# Supplementary material for: Application of a metathesis reaction in the synthesis of sterically congested medium-sized rings. A direct ring closing versus a double bond migration–ring closing process
Source: Royal Society of Chemistry journal article supplement (doi:10.1039/c1ob05086a), 2011-01-01

**Application of metathesis reaction in the synthesis of sterically congested medium-sized rings. A direct ring closing versus a double bond migration – ring closing process.**

Michał Michalak,<sup>[a]</sup> and Jerzy Wicha<sup>[a]\*</sup>

<sup>[a]</sup>Institute of Organic Chemistry

Polish Academy of Sciences

Kasprzaka 44/52, 01-224 Warsaw

Fax: (+) 48 22 632 66 81

E-mail: jwicha@icho.edu.pl

**Supporting Information**

**Selected <sup>1</sup>H and <sup>13</sup>C NMR spectra of reported compounds**

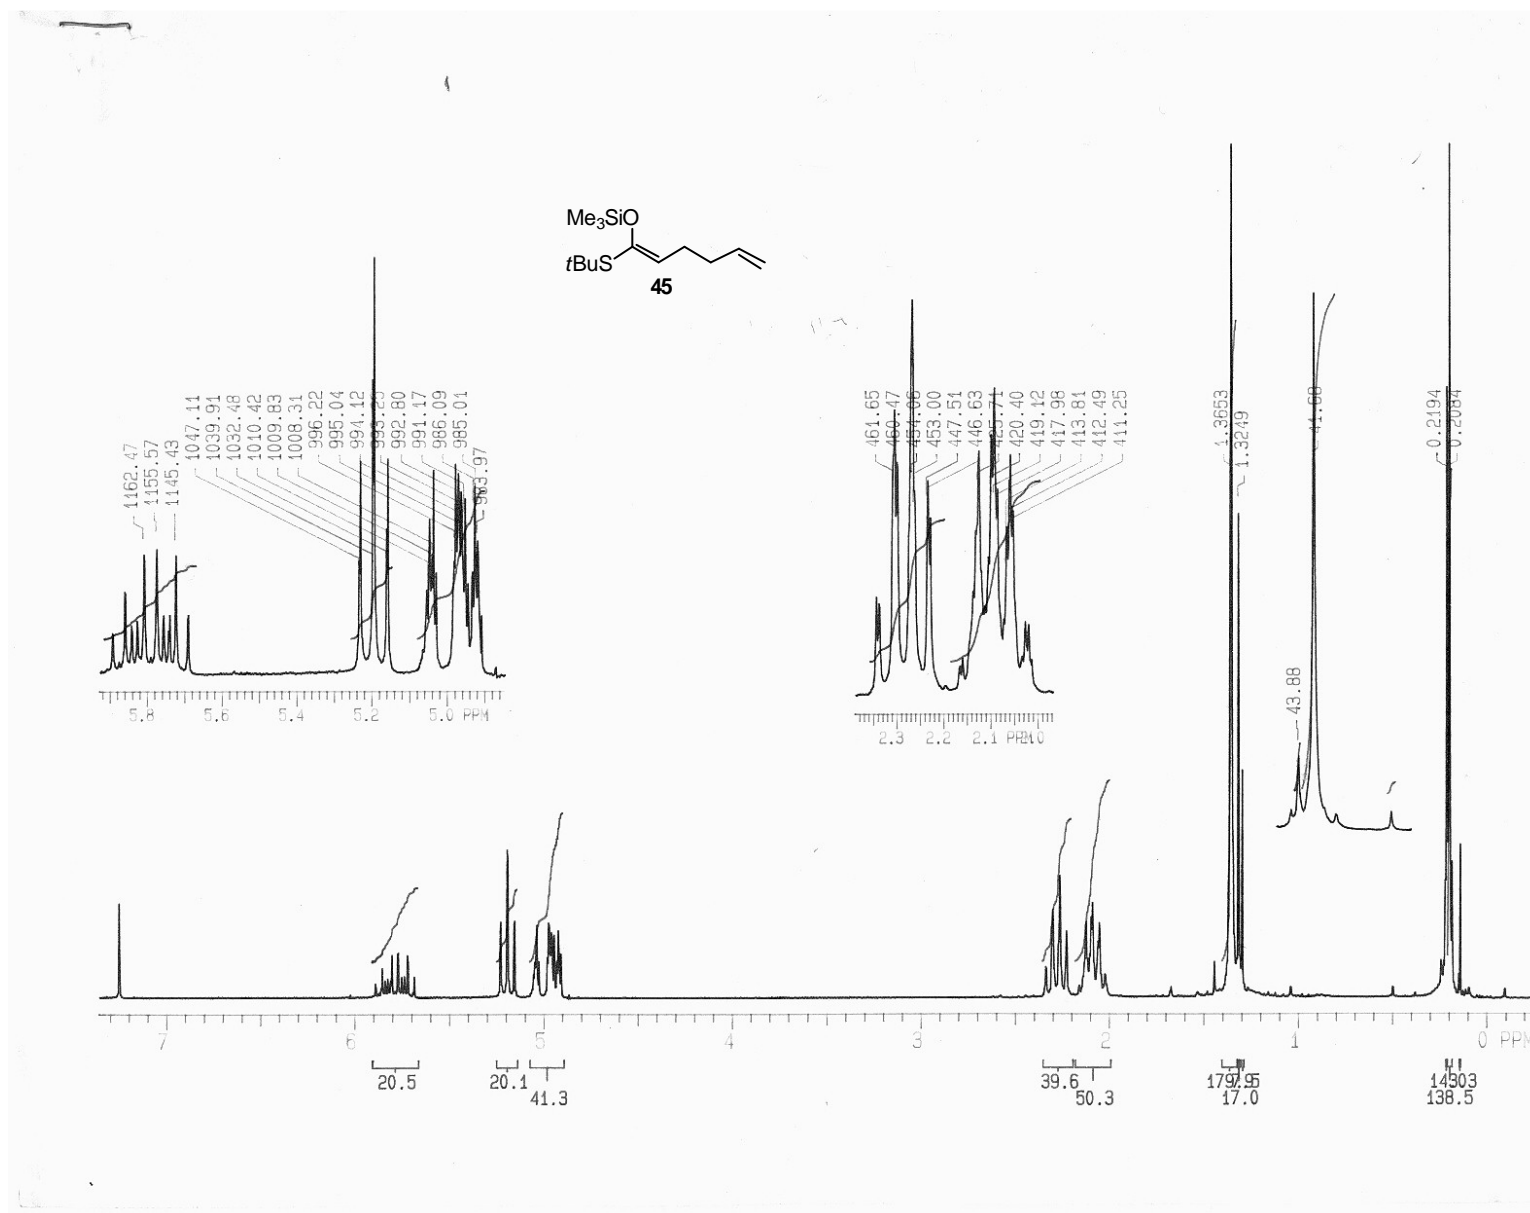

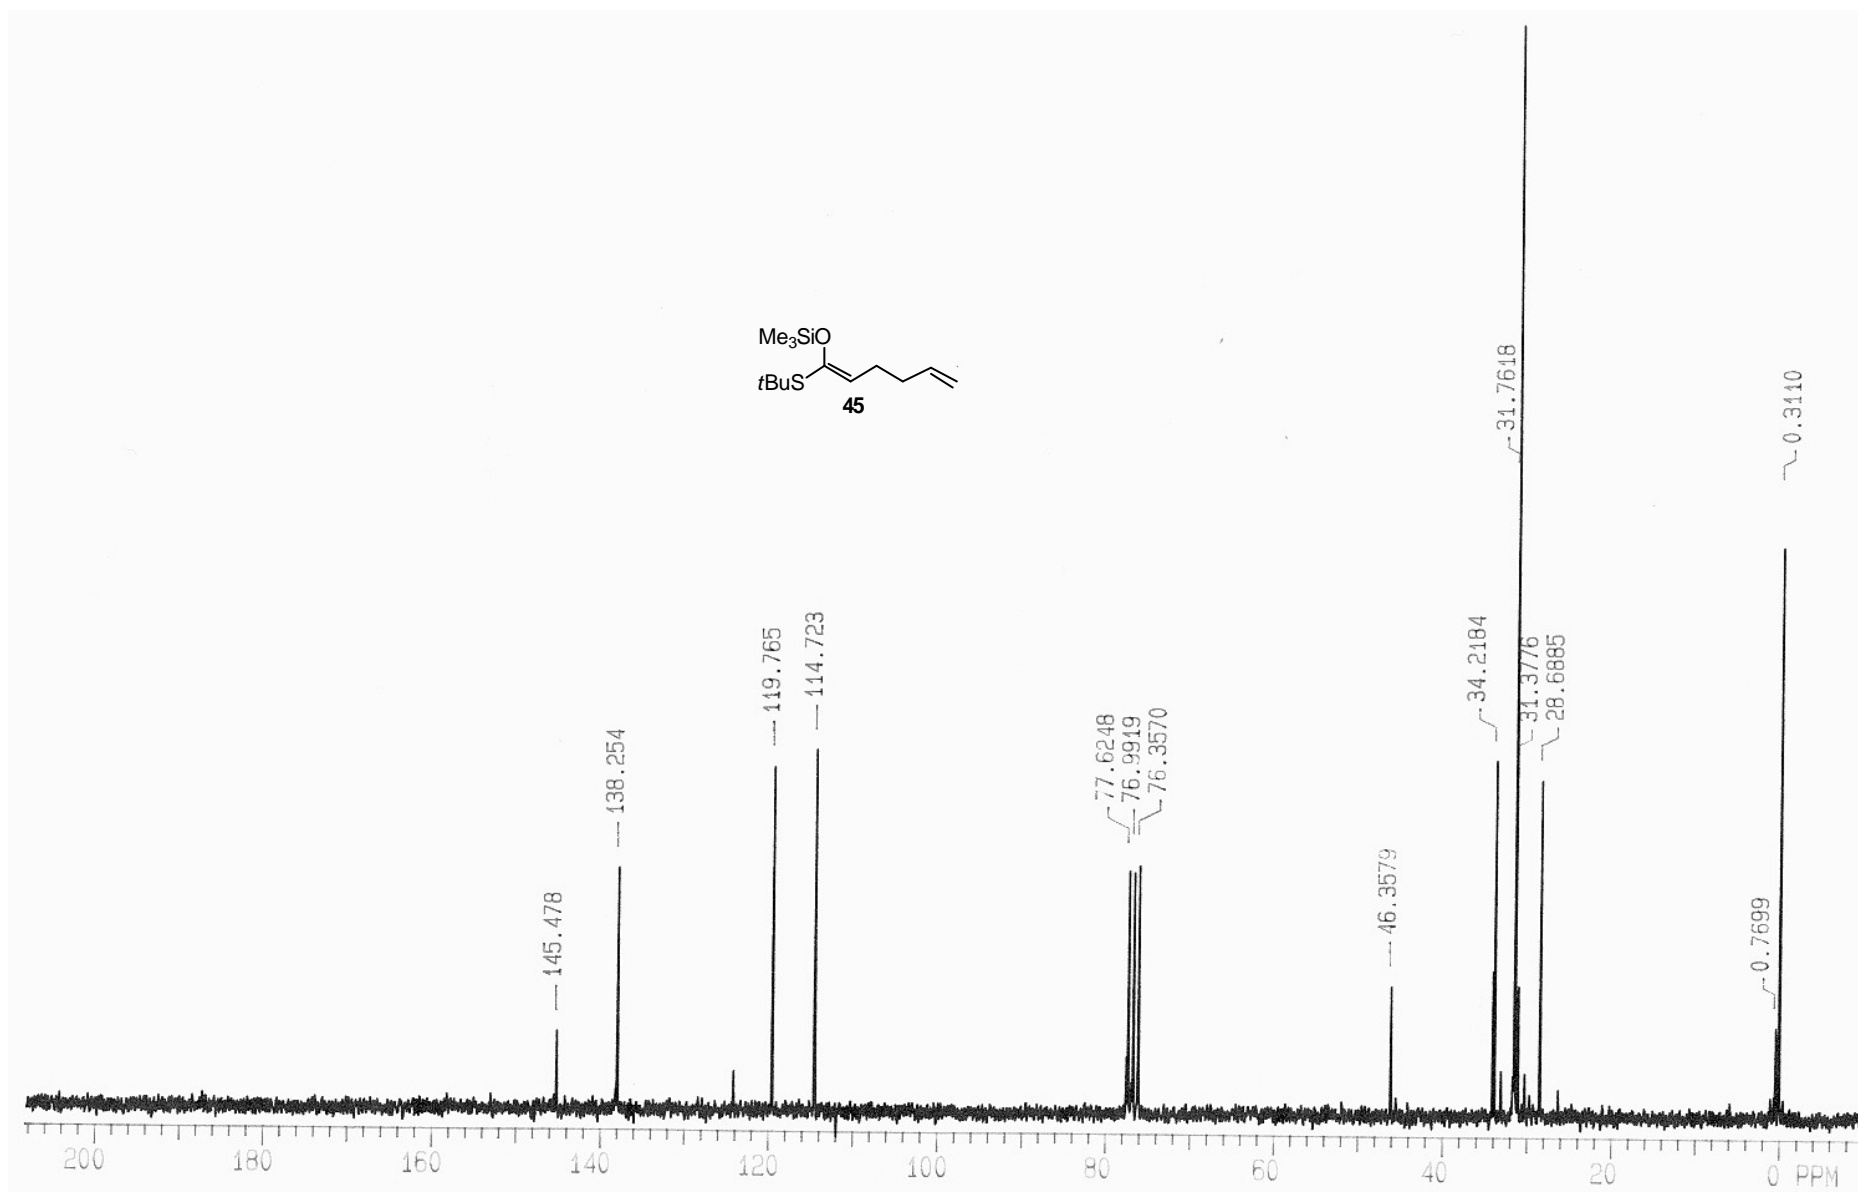

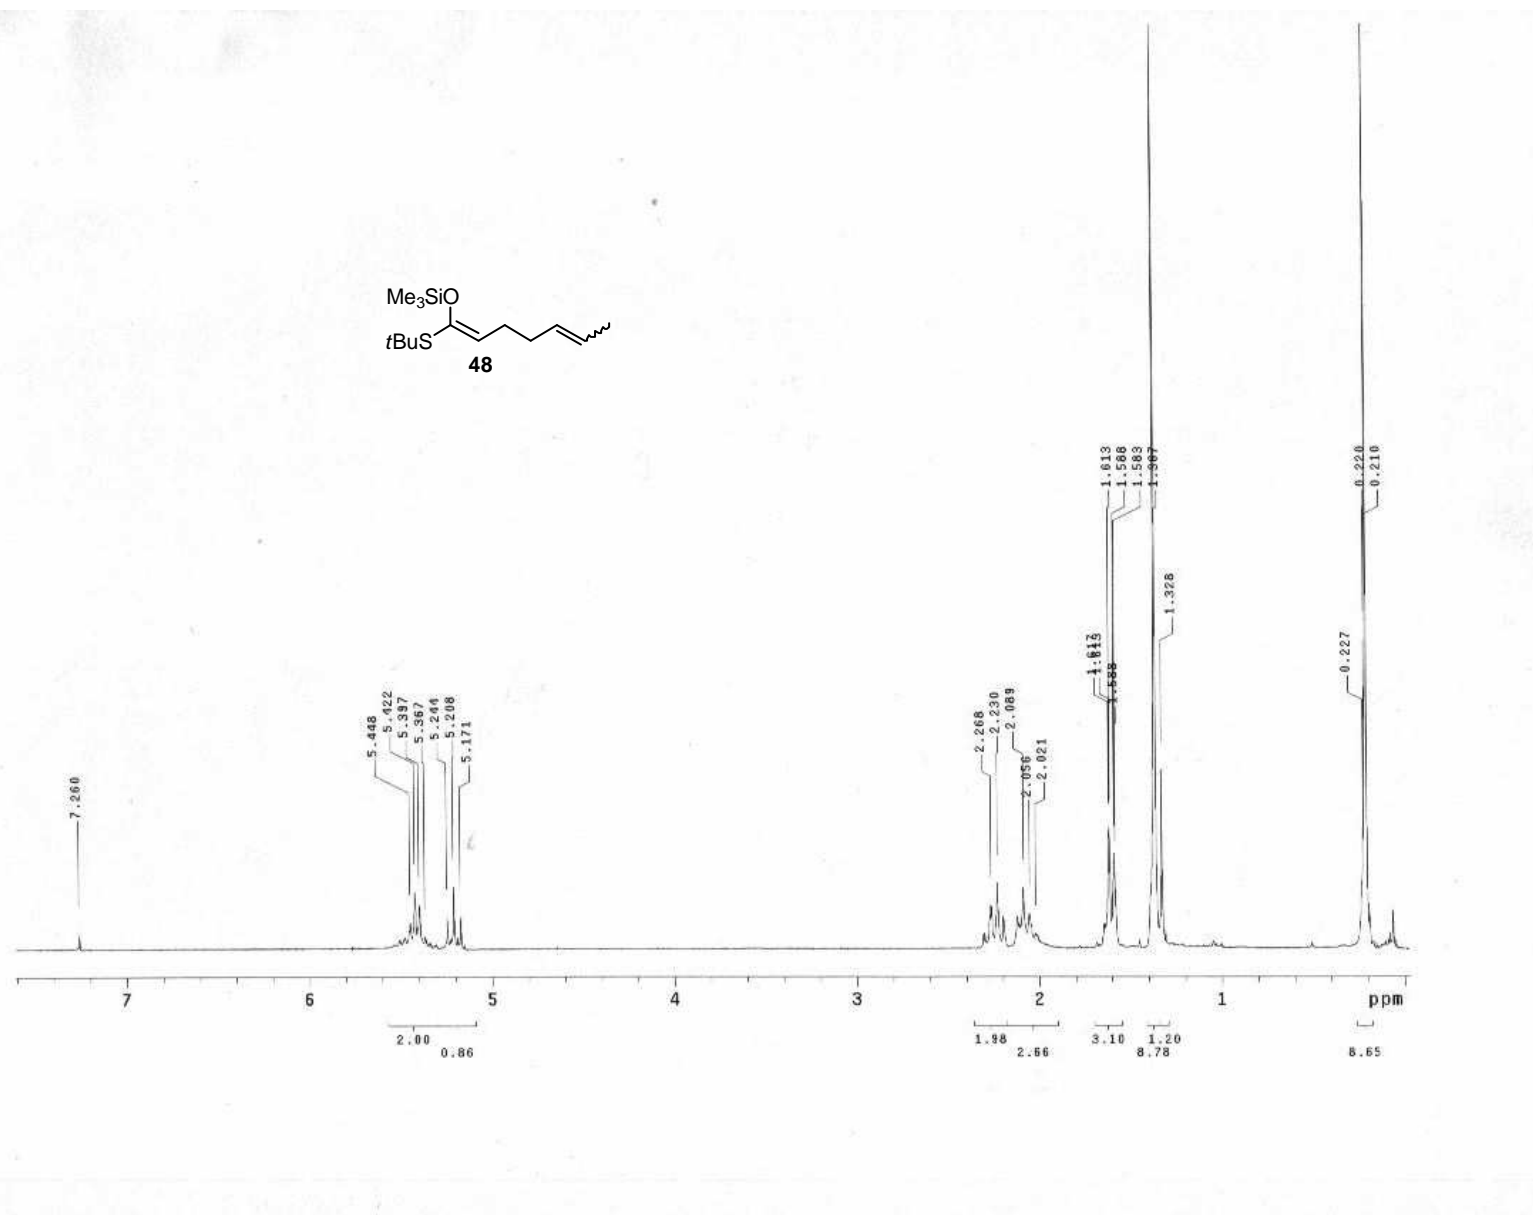



mm332c  
Pulse Sequence: s2pu1  
Solvent: CDCl3  
Ambient temperature  
GEMINI-200BB "nmr200"  
  
Relax. delay 2.000 sec  
Pulse 45.0 degrees  
Acq. time 1.499 sec  
Width 16000.0 Hz  
656 repetitions  
OBSERVE C13, 50.2827724 MHz  
DECOUPLE H1, 199.9717975 MHz  
Power 38 dB  
continuously on  
WALTZ-16 modulated  
DATA PROCESSING  
Line broadening 1.0 Hz  
FT size 65536

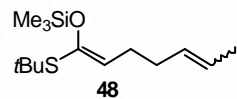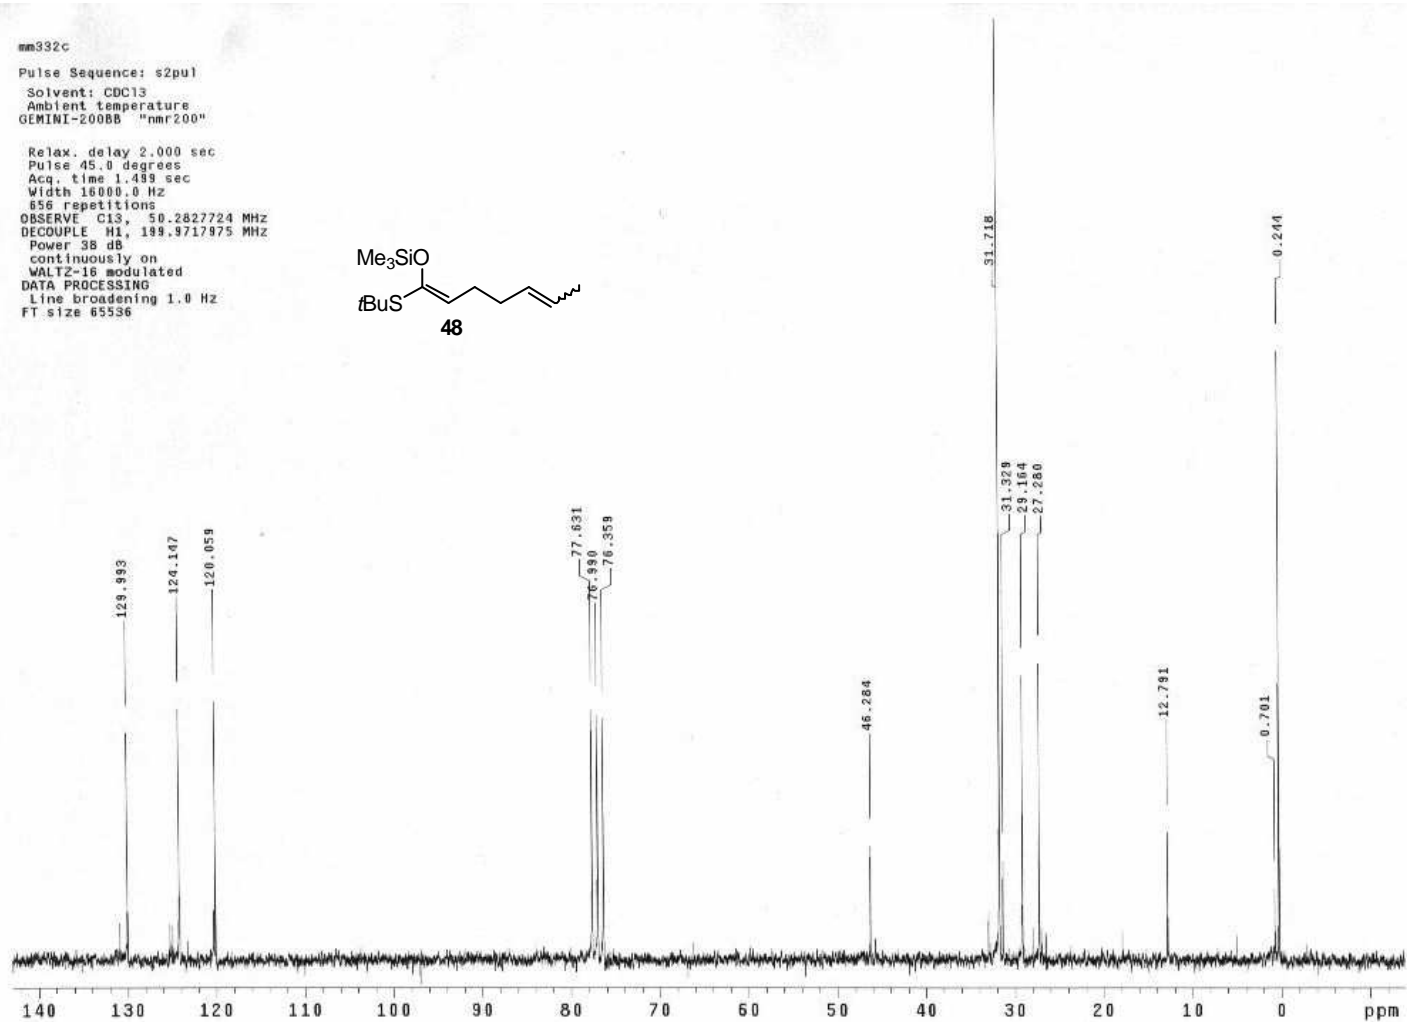

alkoholderabiany  
Pulse Sequence: s2pu1  
Solvent: CDCl3  
Ambient temperature  
CEMIRI-200BB "nmr200"  
  
Relax. delay 0.100 sec  
Pulse 56.2 degrees  
Acq. time 4.009 sec  
Width 2531.2 Hz  
44 repetitions  
OBSERVE H1, 199.9710974 MHz  
DATA PROCESSING  
FT size 32768

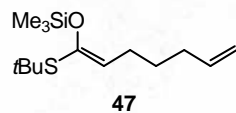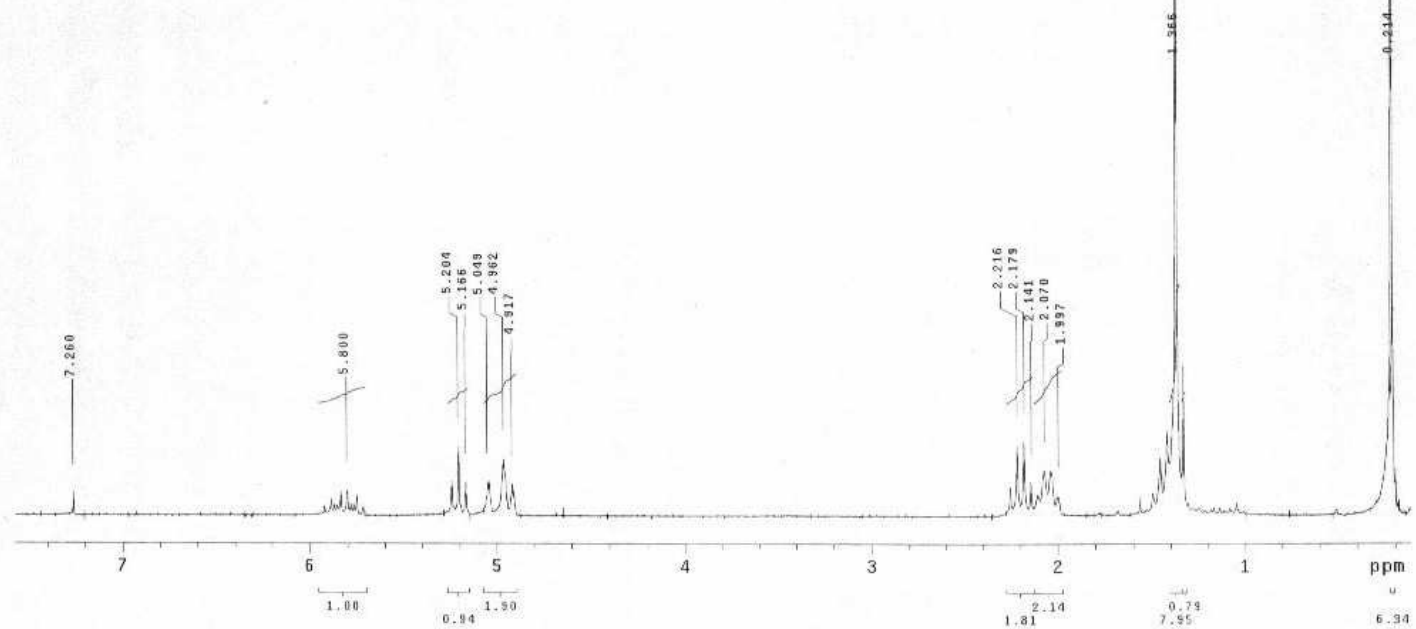

13C OBSERVE  
Pulse Sequence: s2pul  
Solvent: CDCl3  
Ambient temperature  
GEMINI-200BB "nmr200"  
  
Relax. delay 2.000 sec  
Pulse 45.0 degrees  
Acq. time 1.499 sec  
Width 12000.0 Hz  
224 repetitions  
OBSERVE C13, 50.2827724 MHz  
DECOUPLE H1, 199.9717975 MHz  
Power 38 dB  
continuously on  
WALTZ-16 modulated  
DATA PROCESSING  
Line broadening 1.0 Hz  
FT size 65536

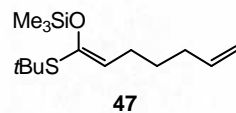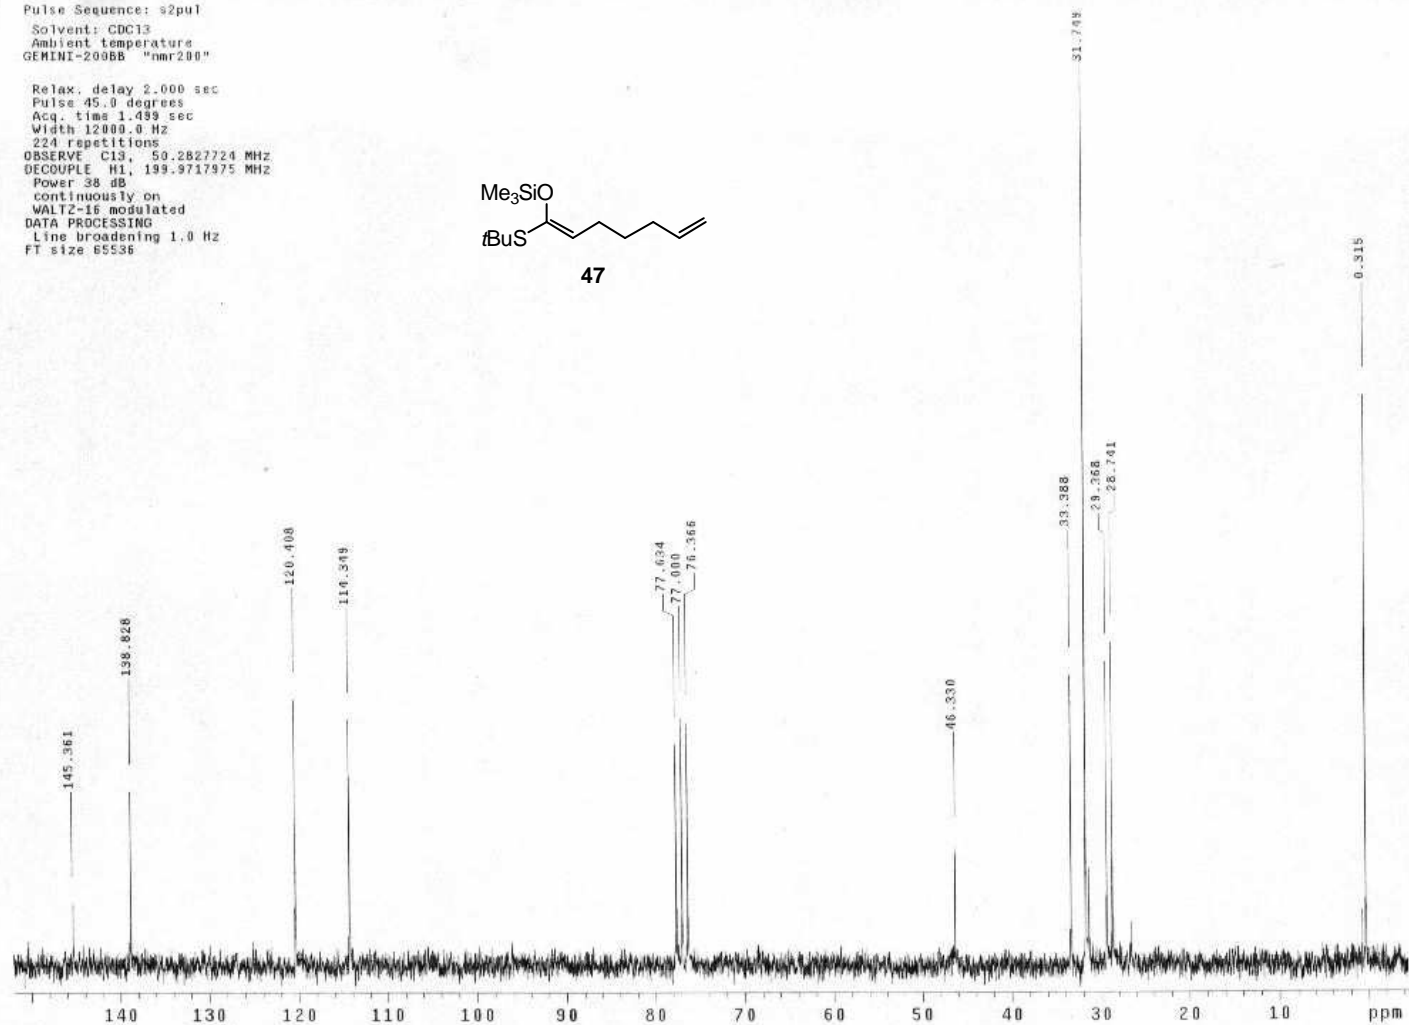

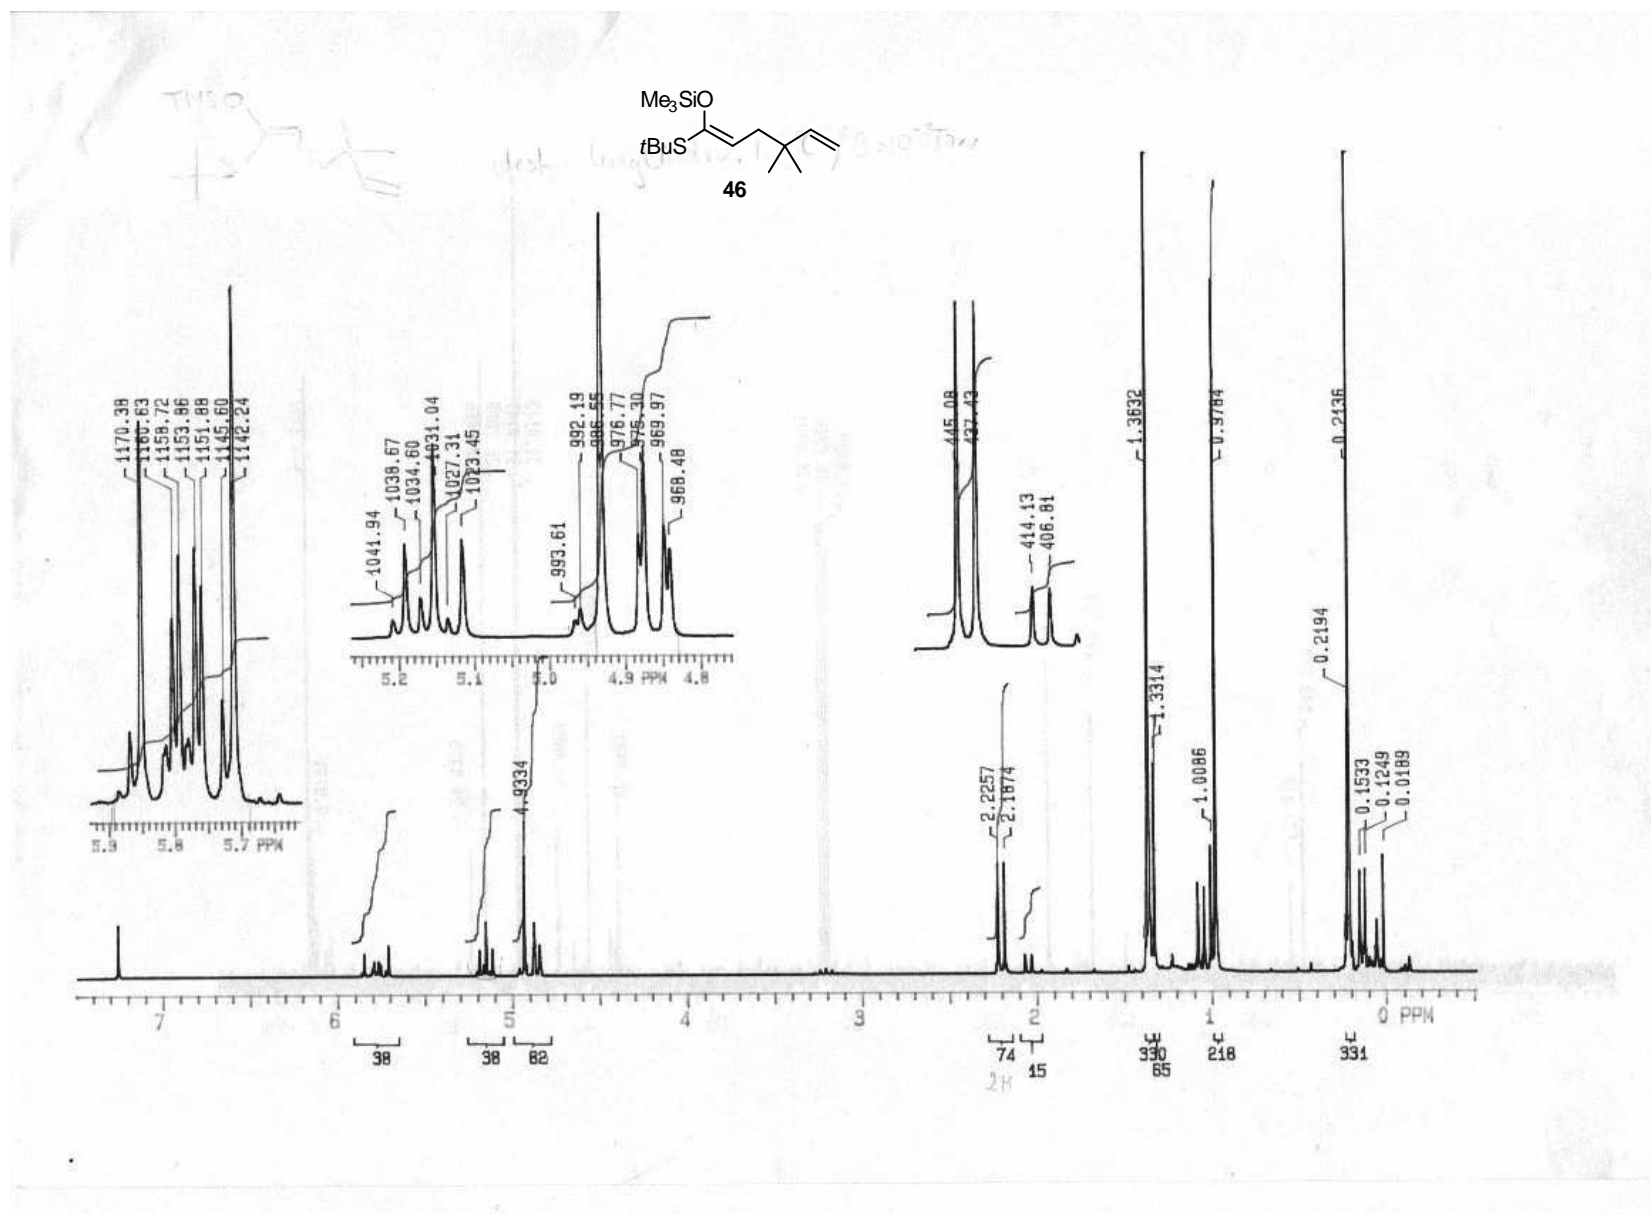

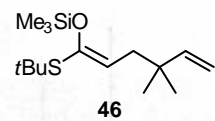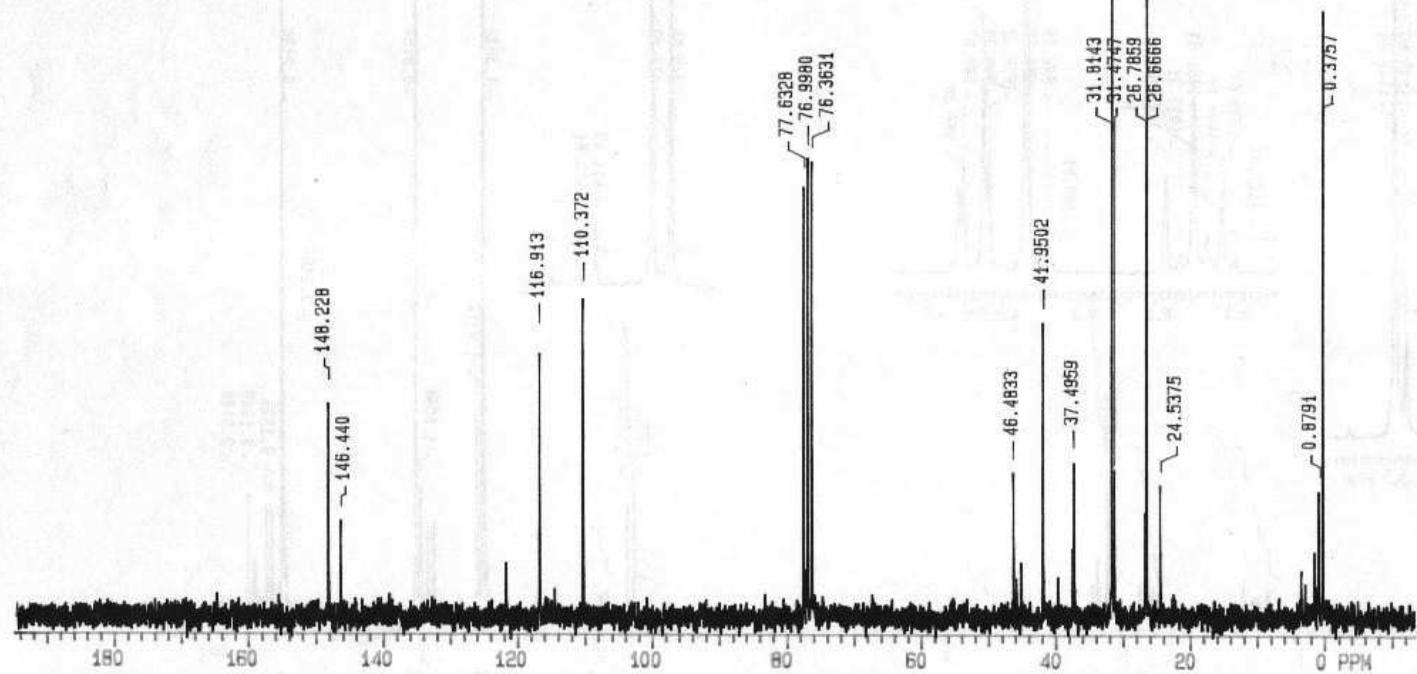

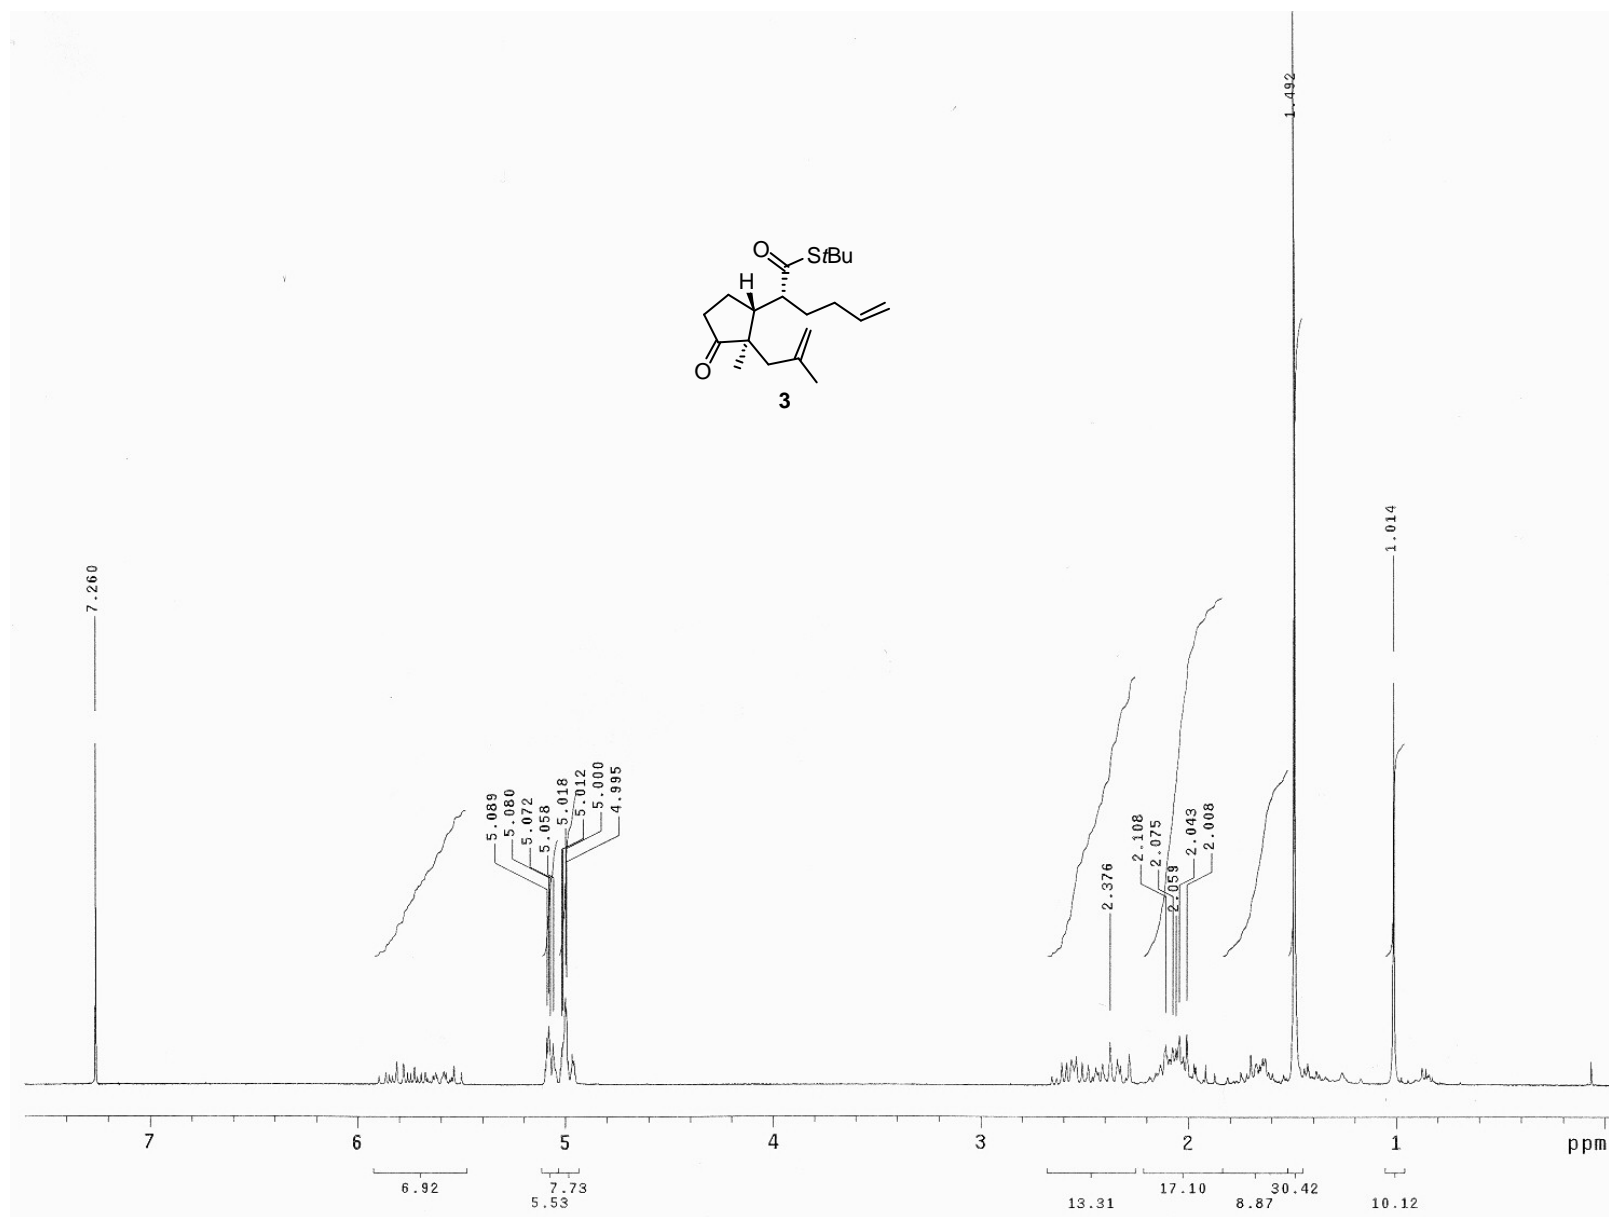

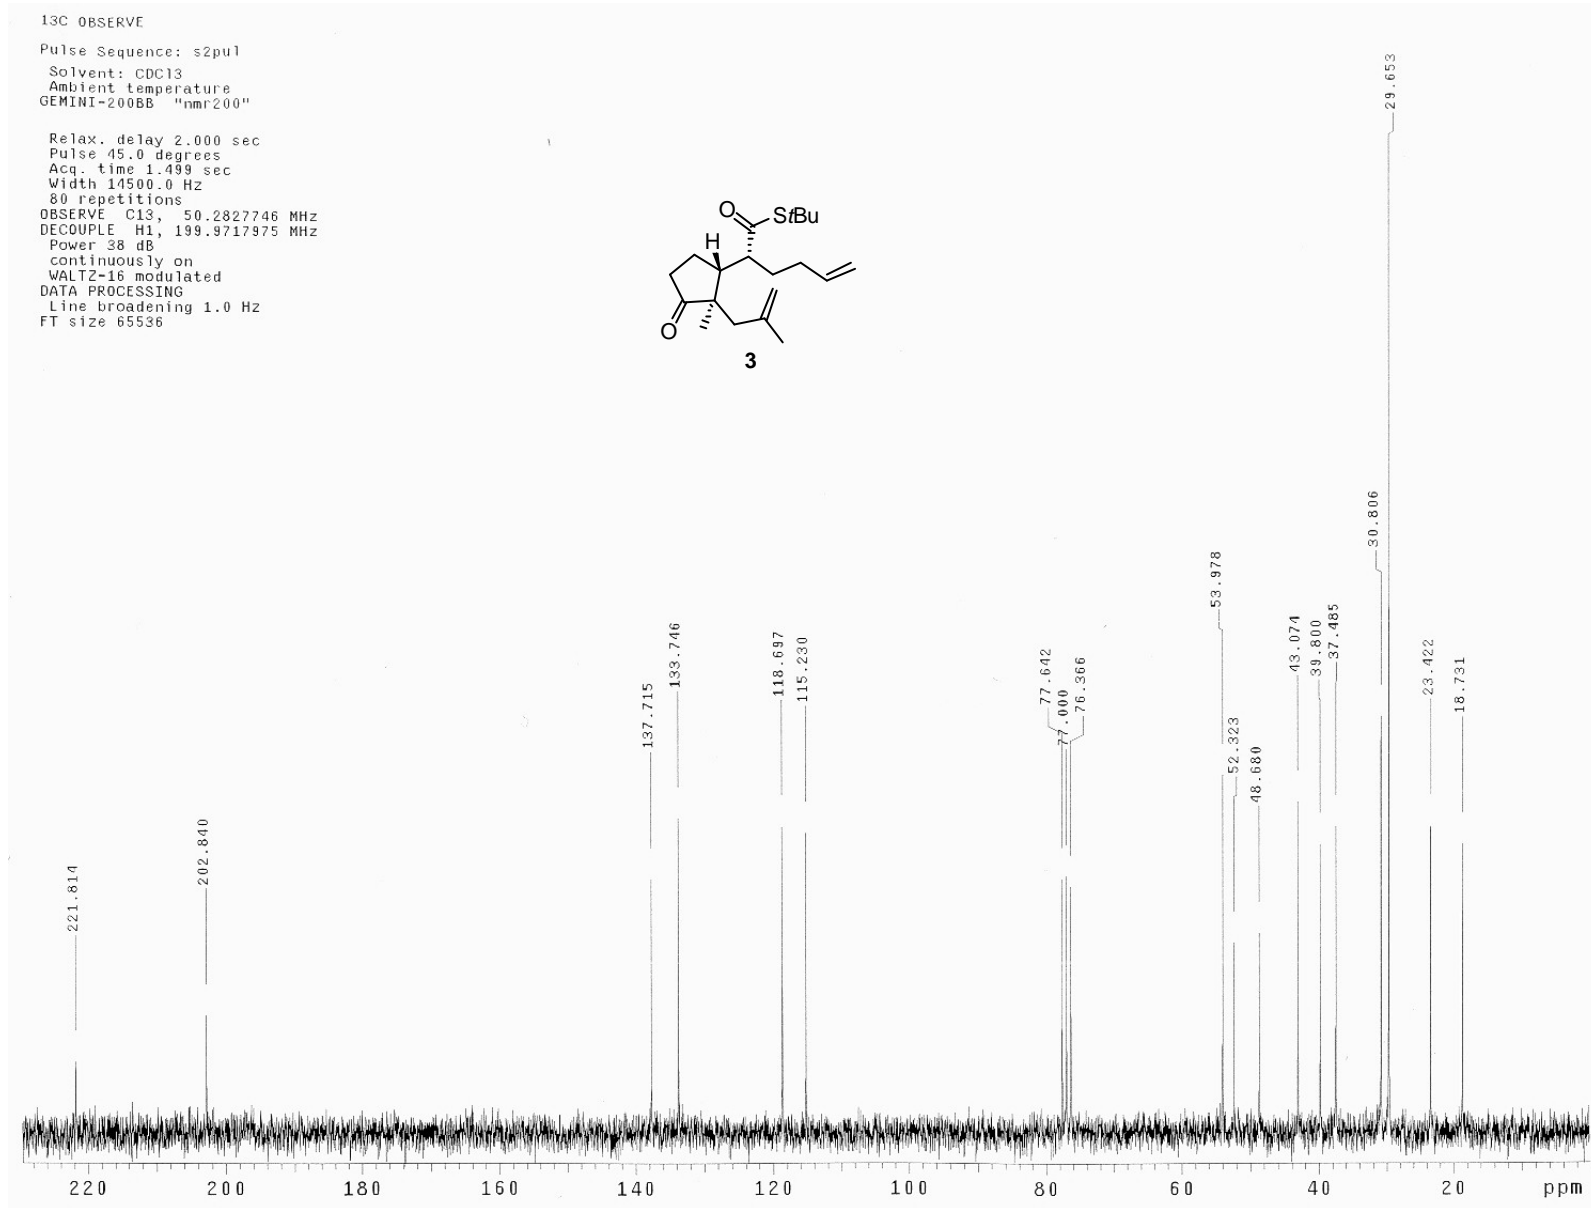

alkoholadorabiany  
Pulse Sequence: s2pu1  
Solvent: CDCl3  
Ambient temperature  
GEMINI-2006B "nmr200"  
  
Relax. delay 0.100 sec  
Pulse 56.2 degrees  
Acq. time 4.000 sec  
Width 2581.2 Hz  
60 repetitions  
OBSERVE H1, 199.9710977 MHz  
DATA PROCESSING  
FT size 32768

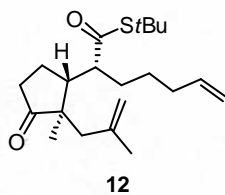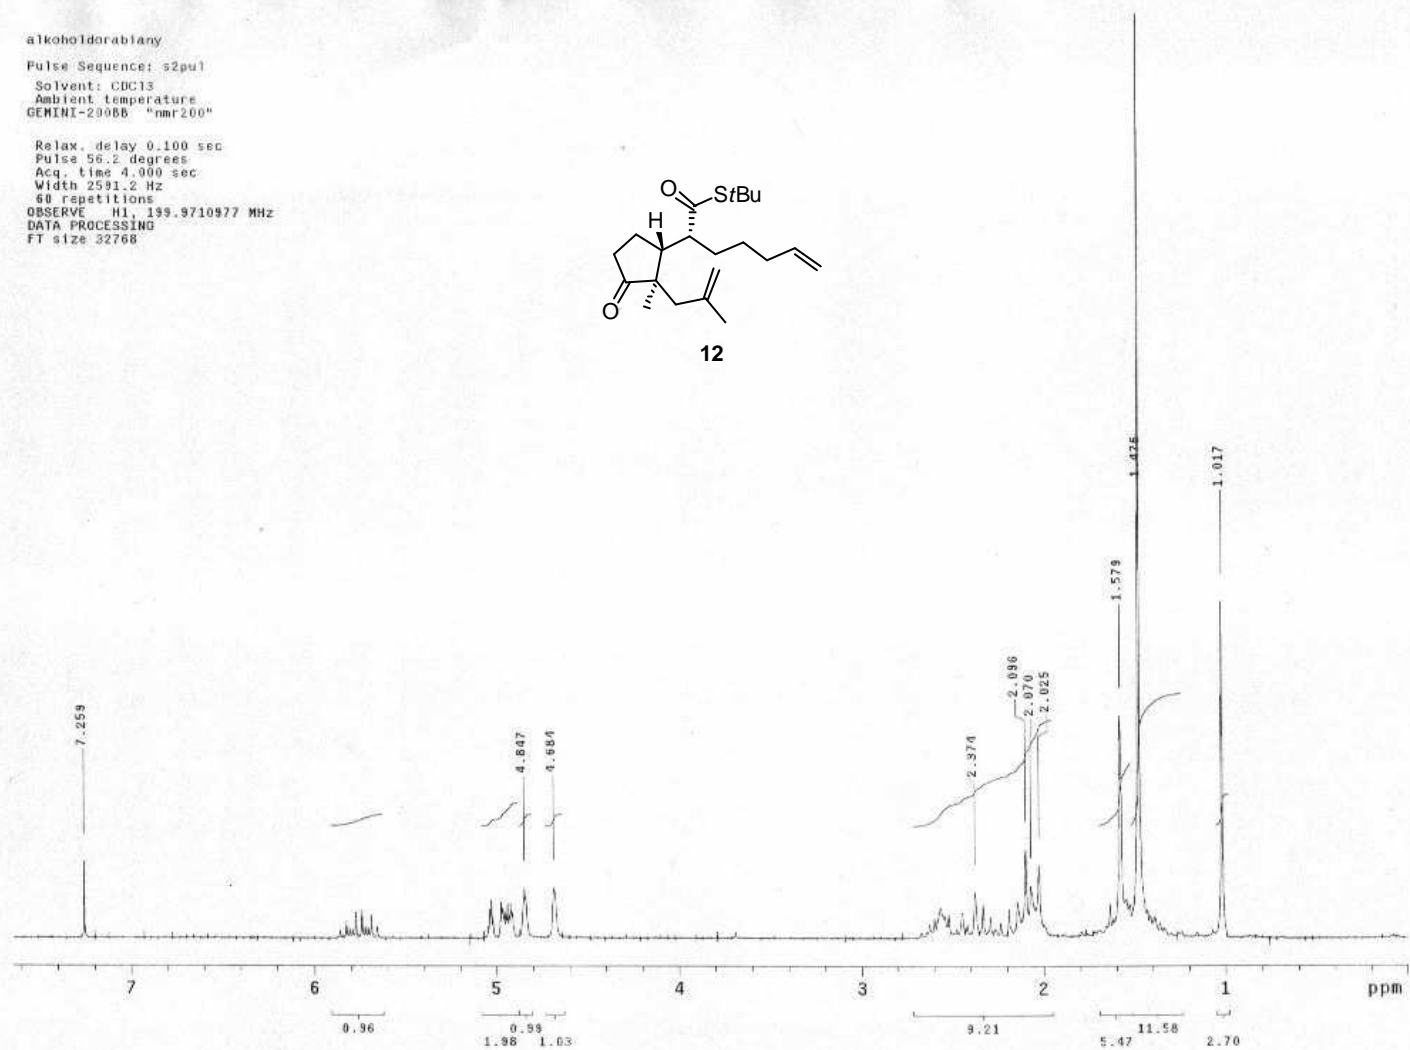



13C OBSERVE  
Pulse Sequence: s2pu1  
Solvent: CDCl3  
Ambient temperature  
GENI-200SB "nmr200"

Relax. delay 2.000 sec  
Pulse 45.0 degrees  
Acq. time 1.489 sec  
Width 14500.0 Hz  
288 repetitions  
OBSERVE C13, 50.2827741 MHz  
DECOUPLE H1, 199.9717975 MHz  
Power 38 dB  
continuously on  
WALTZ-16 modulated  
DATA PROCESSING  
Line broadening 1.0 Hz  
FT size 65536

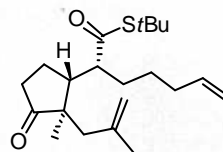

12

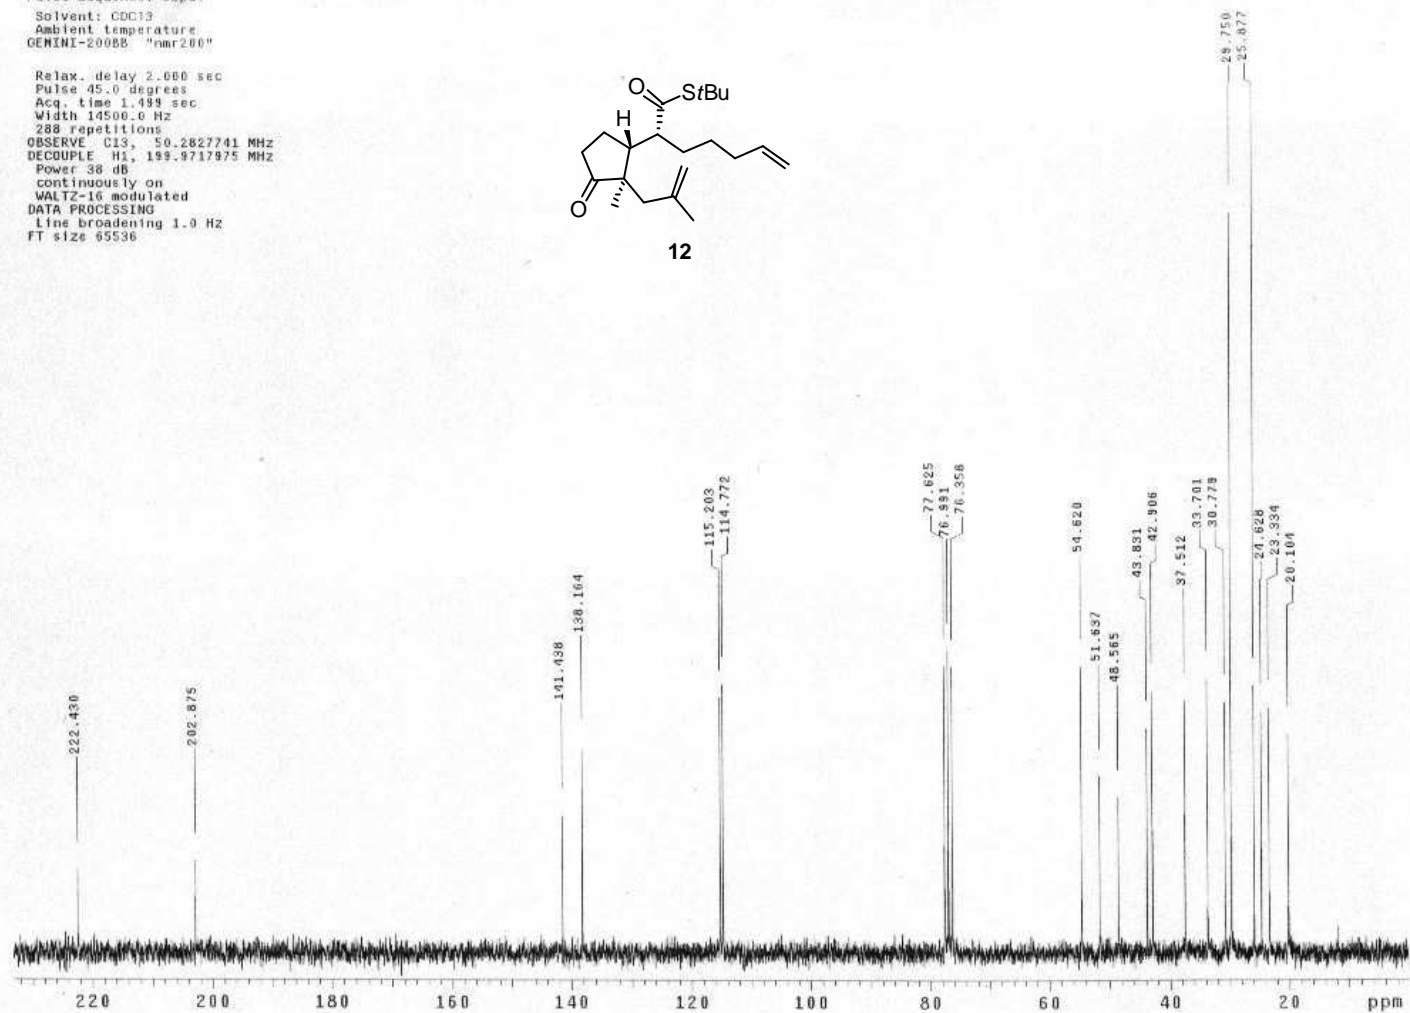

nm173  
Pulse Sequence: s2pu1  
Solvent: CDCl3  
Ambient temperature  
GERINI-2008B "nmr200"  
  
Relax. delay 0.100 sec  
Pulse 30.0 degrees  
Acq. time 3.151 sec  
Width 2600.0 Hz  
36 repetitions  
OBSERVE H1, 199.9750737 MHz  
DATA PROCESSING  
FT size 32768  
Total time 30 min, 34 sec

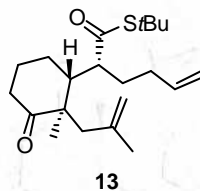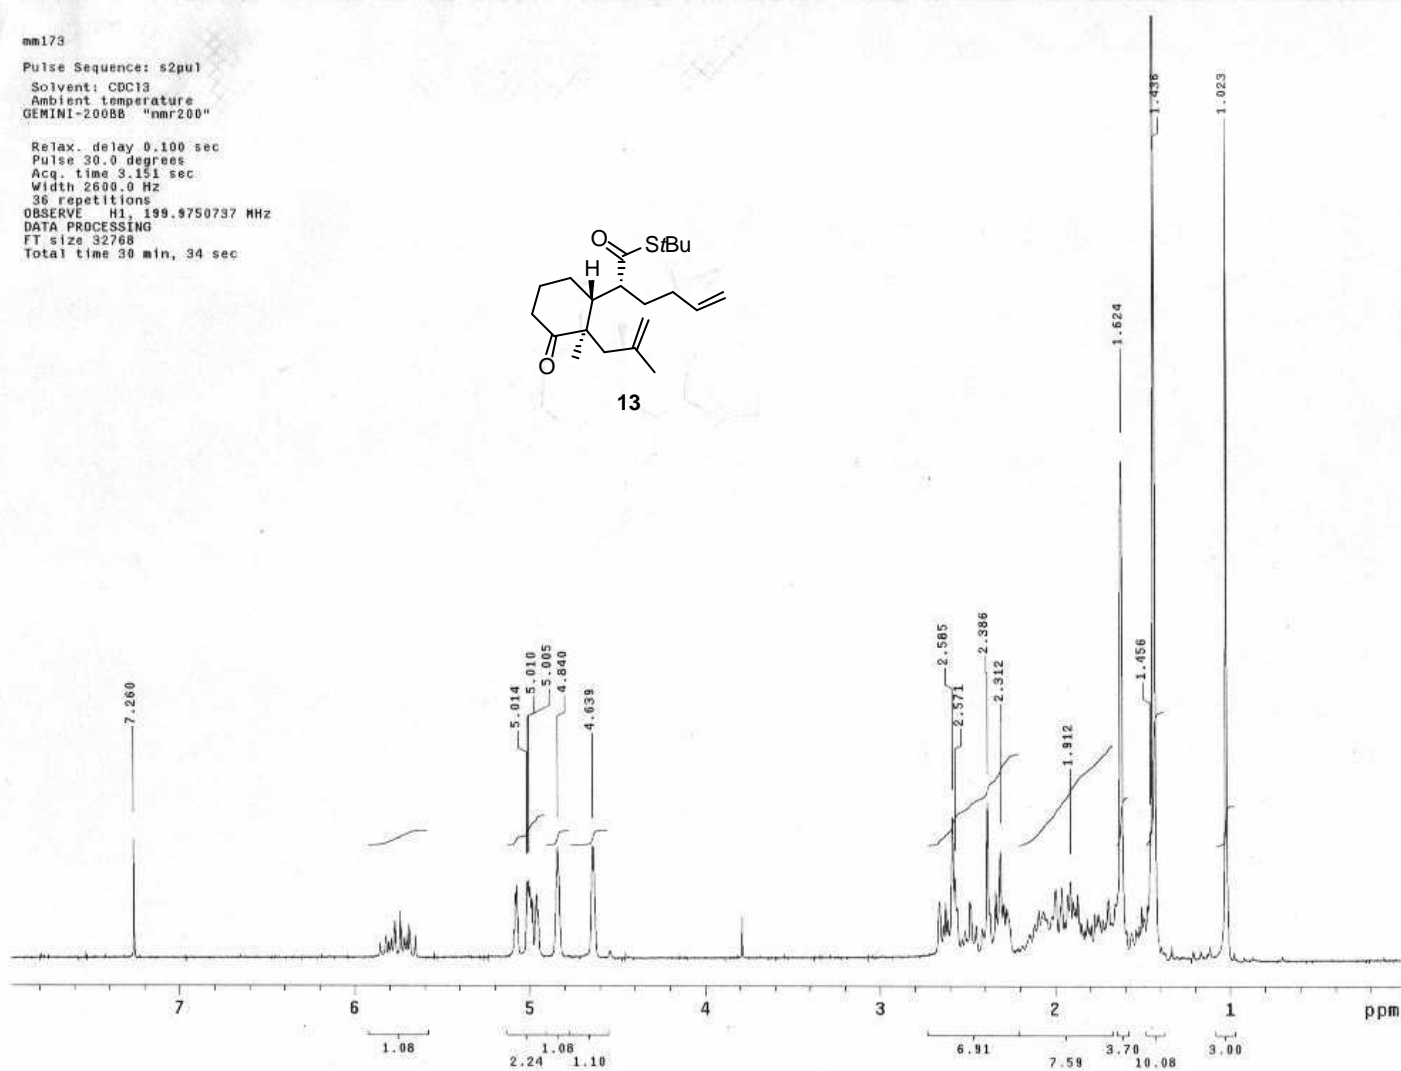

nm173  
Pulse Sequence: s2pul  
Solvent: CDCl3  
Ambient temperature  
GEMINI-200BB "nmr200"  
  
Relax. delay 2.000 sec  
Pulse 48.0 degrees  
Acq. time 2.000 sec  
Width 15500.0 Hz  
176 repetitions  
OBSERVE C13, 50.2837730 MHz  
DECOUPLE H1, 199.9761736 MHz  
Power 38 dB  
continuously on  
WALTZ-16 modulated  
DATA PROCESSING  
Line broadening 1.0 Hz  
FT size 131072  
Total time 118 hr, 45 min, 39 sec

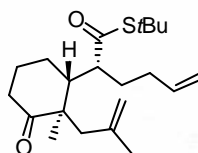

13

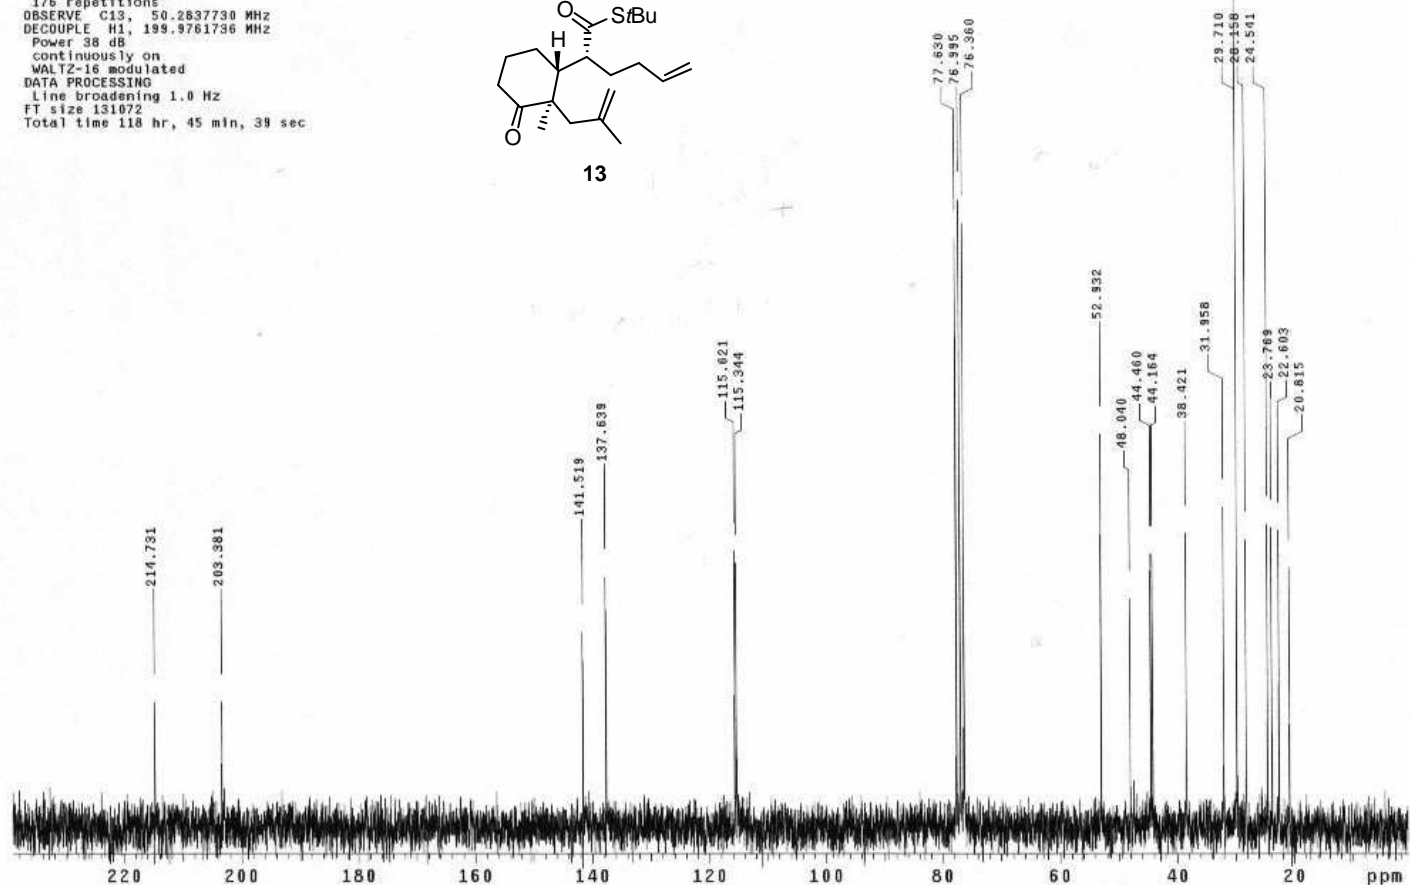

mm518

Pulse Sequence: s2pu1  
Solvent: CDCl3  
Ambient temperature  
GEMINI-200BB "nmr200"

Relax. delay 0.100 sec  
Pulse 56.2 degrees  
Acq. time 4.000 sec  
Width 2591.2 Hz  
24 repetitions  
OBSERVE H1, 199.9710974 MHz  
DATA PROCESSING  
FT size 32768

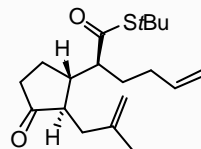

14

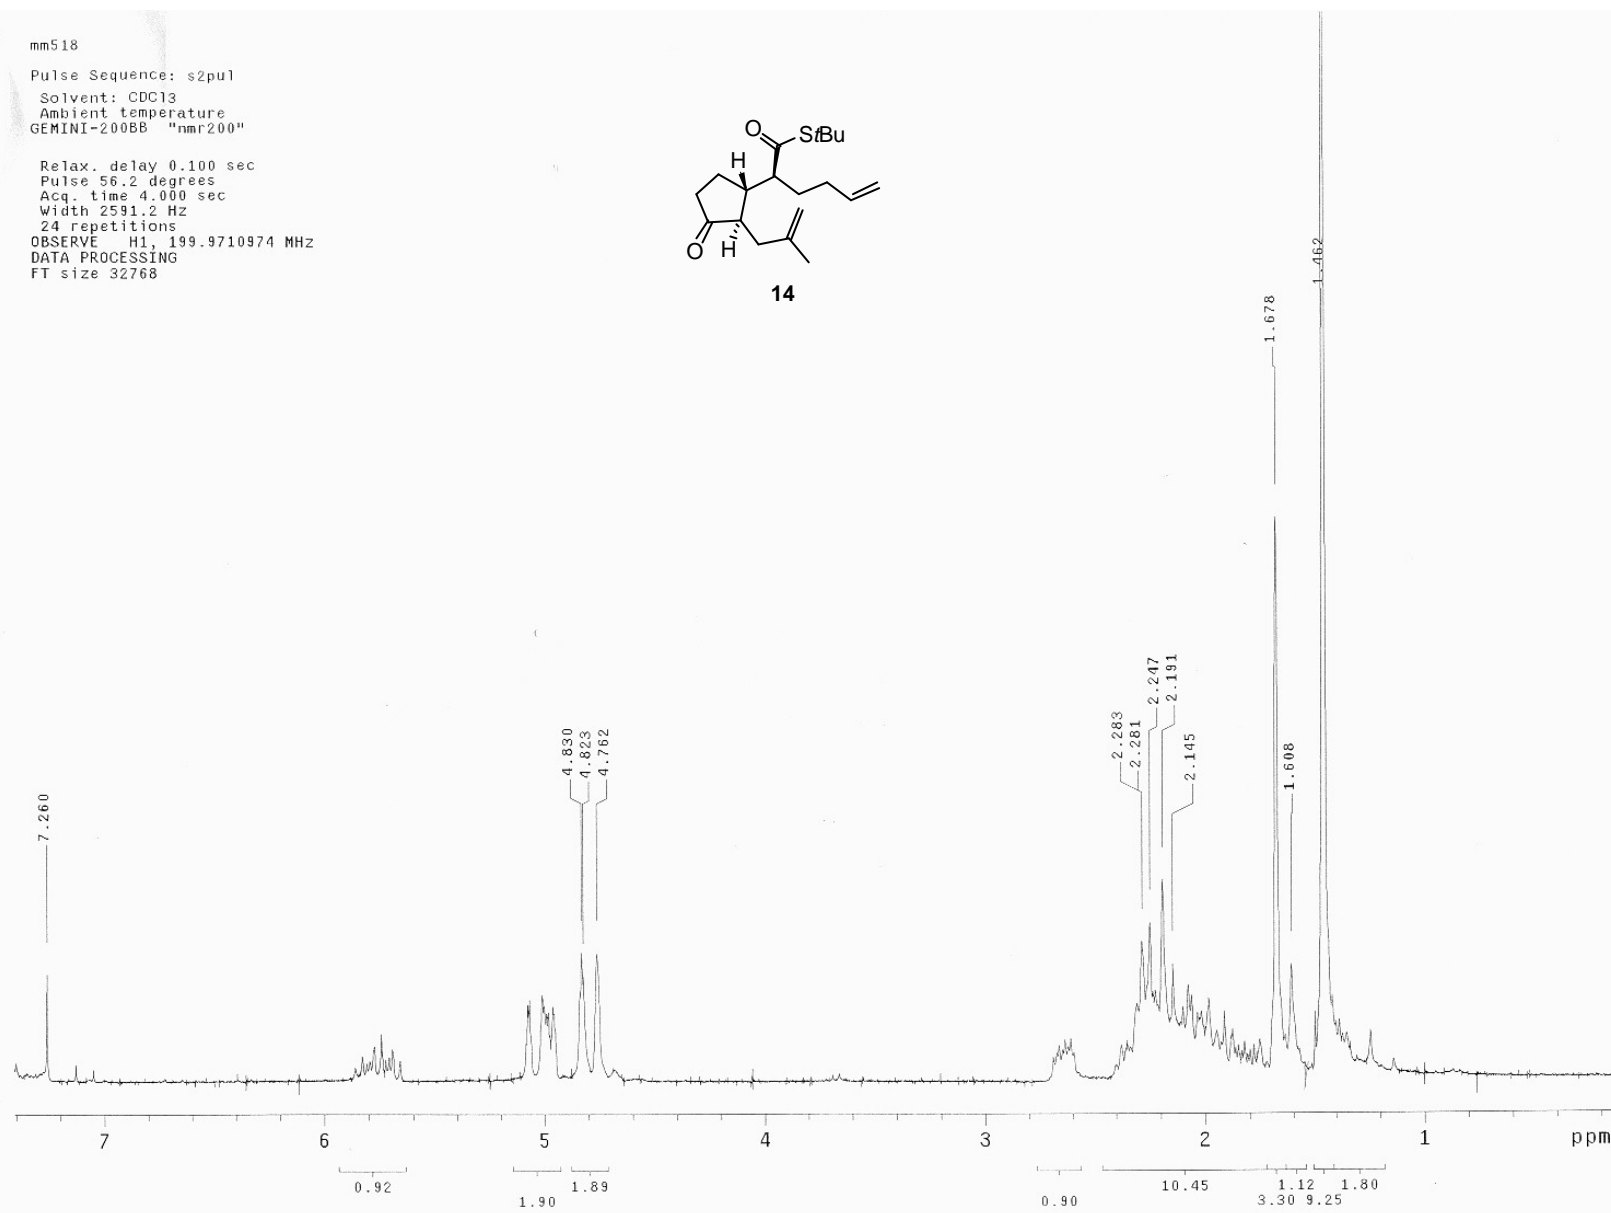

mm491

Pulse Sequence: s2pu1  
Solvent: CDCl3  
Ambient temperature  
GEMINI-200BB "nmr200"

Relax. delay 2.000 sec  
Pulse 45.0 degrees  
Acq. time 1.499 sec  
Width 20000.0 Hz  
272 repetitions  
OBSERVE C13, 50.2827732 MHz  
DECOUPLE H1, 199.9717975 MHz  
Power 38 dB  
continuously on  
WALTZ-16 modulated  
DATA PROCESSING  
Line broadening 1.0 Hz  
FT size 65536

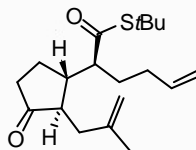

14

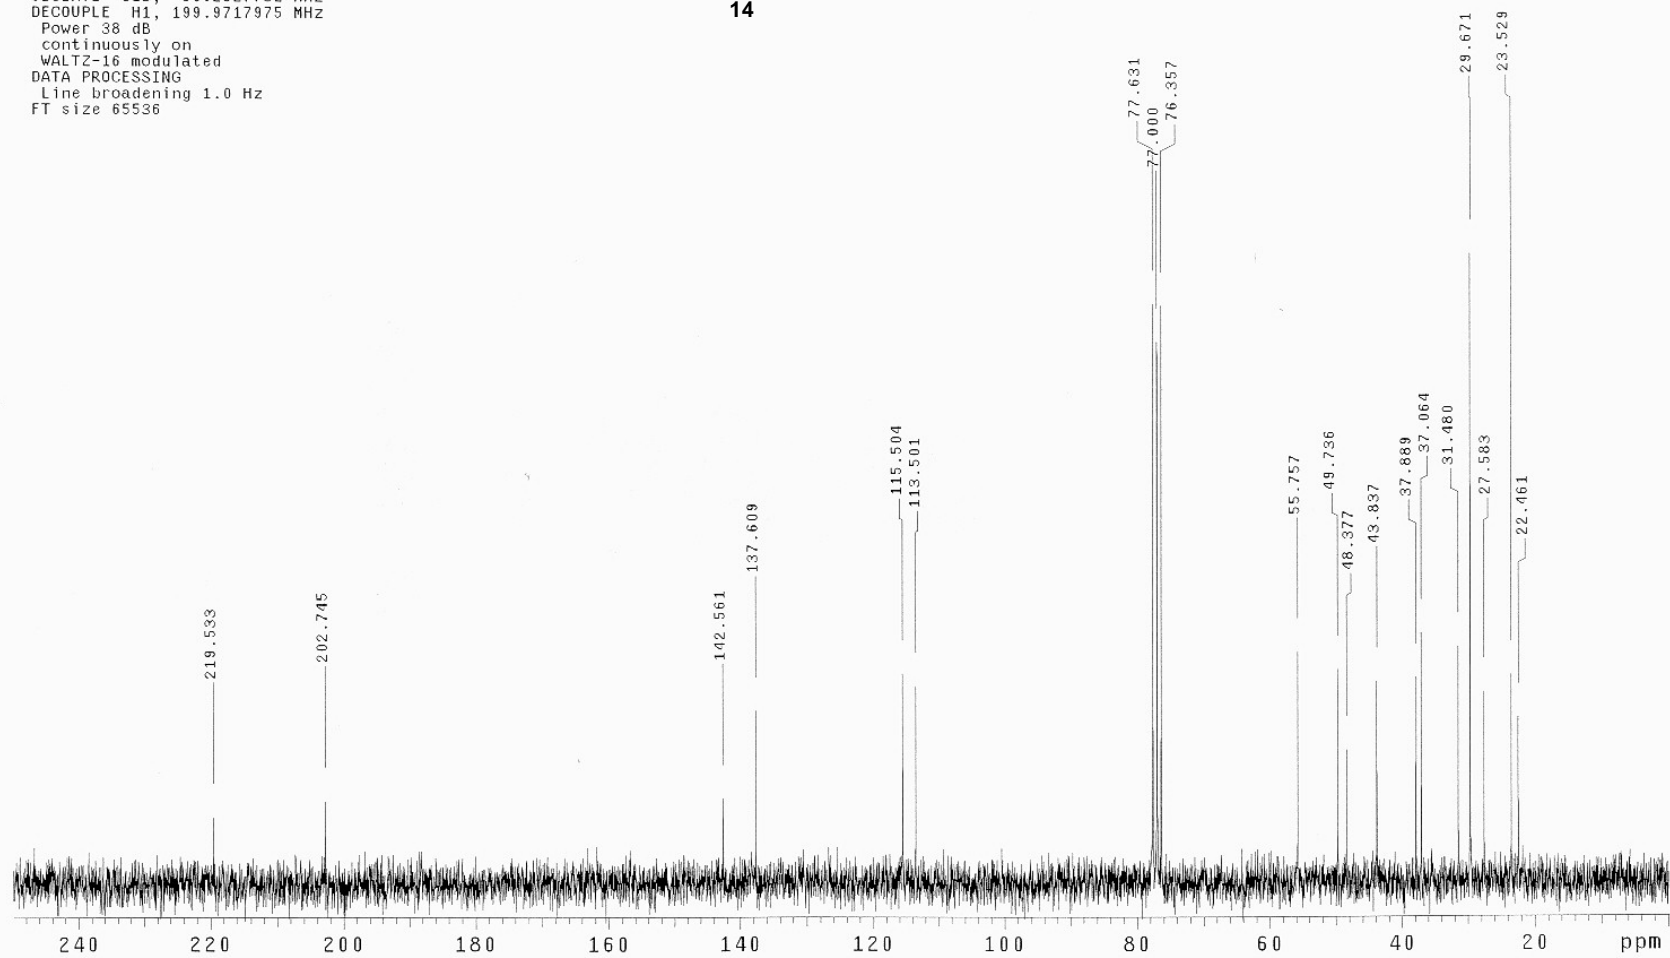

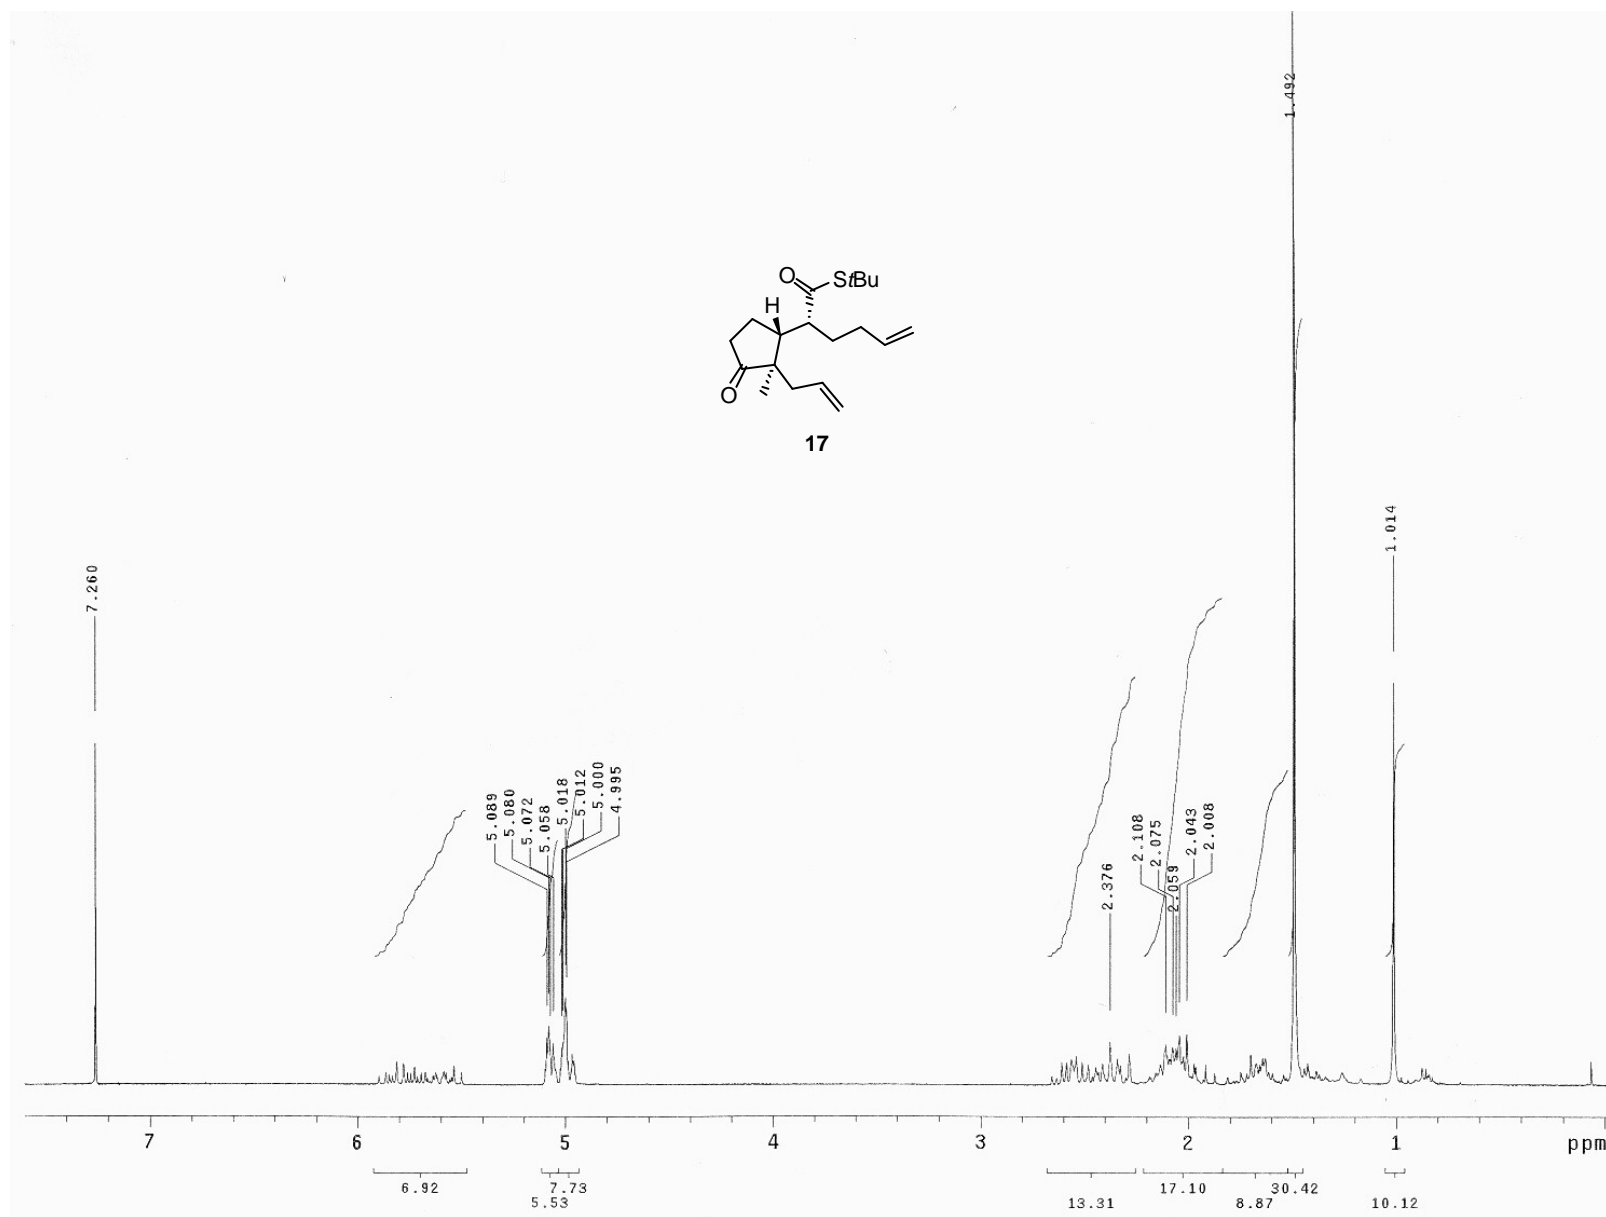

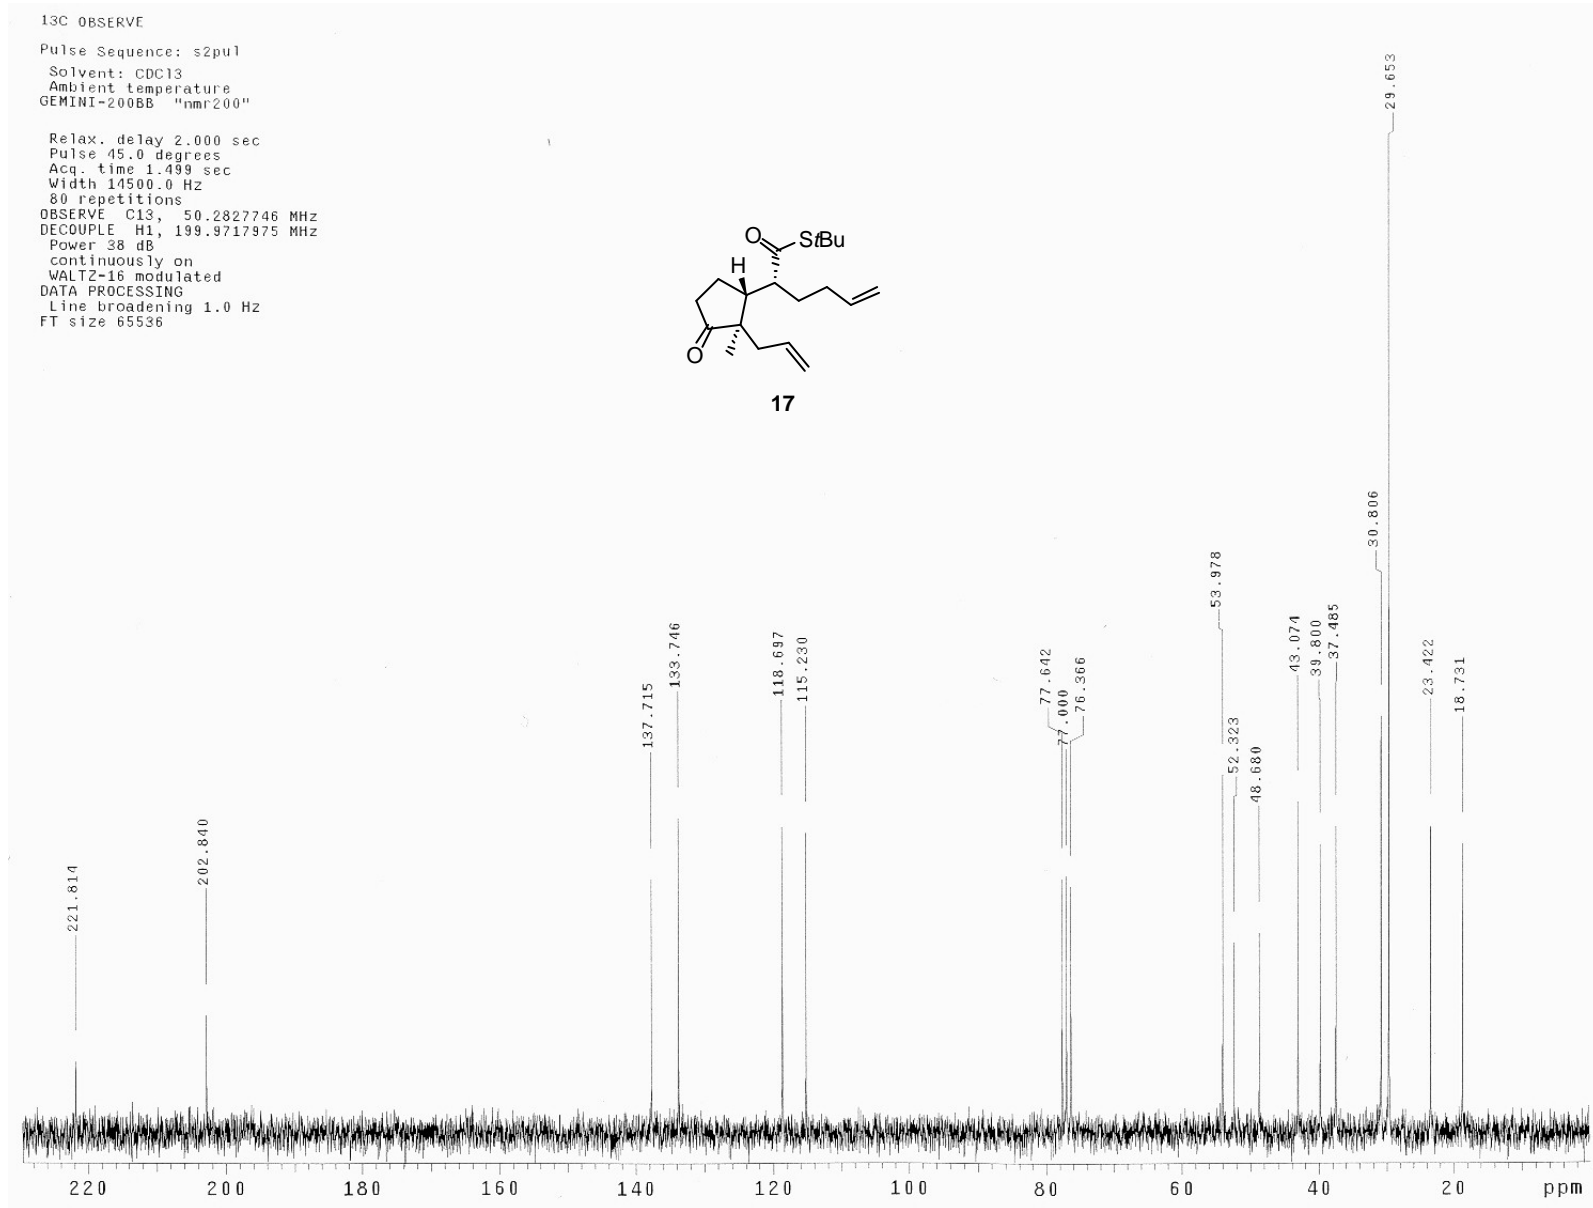

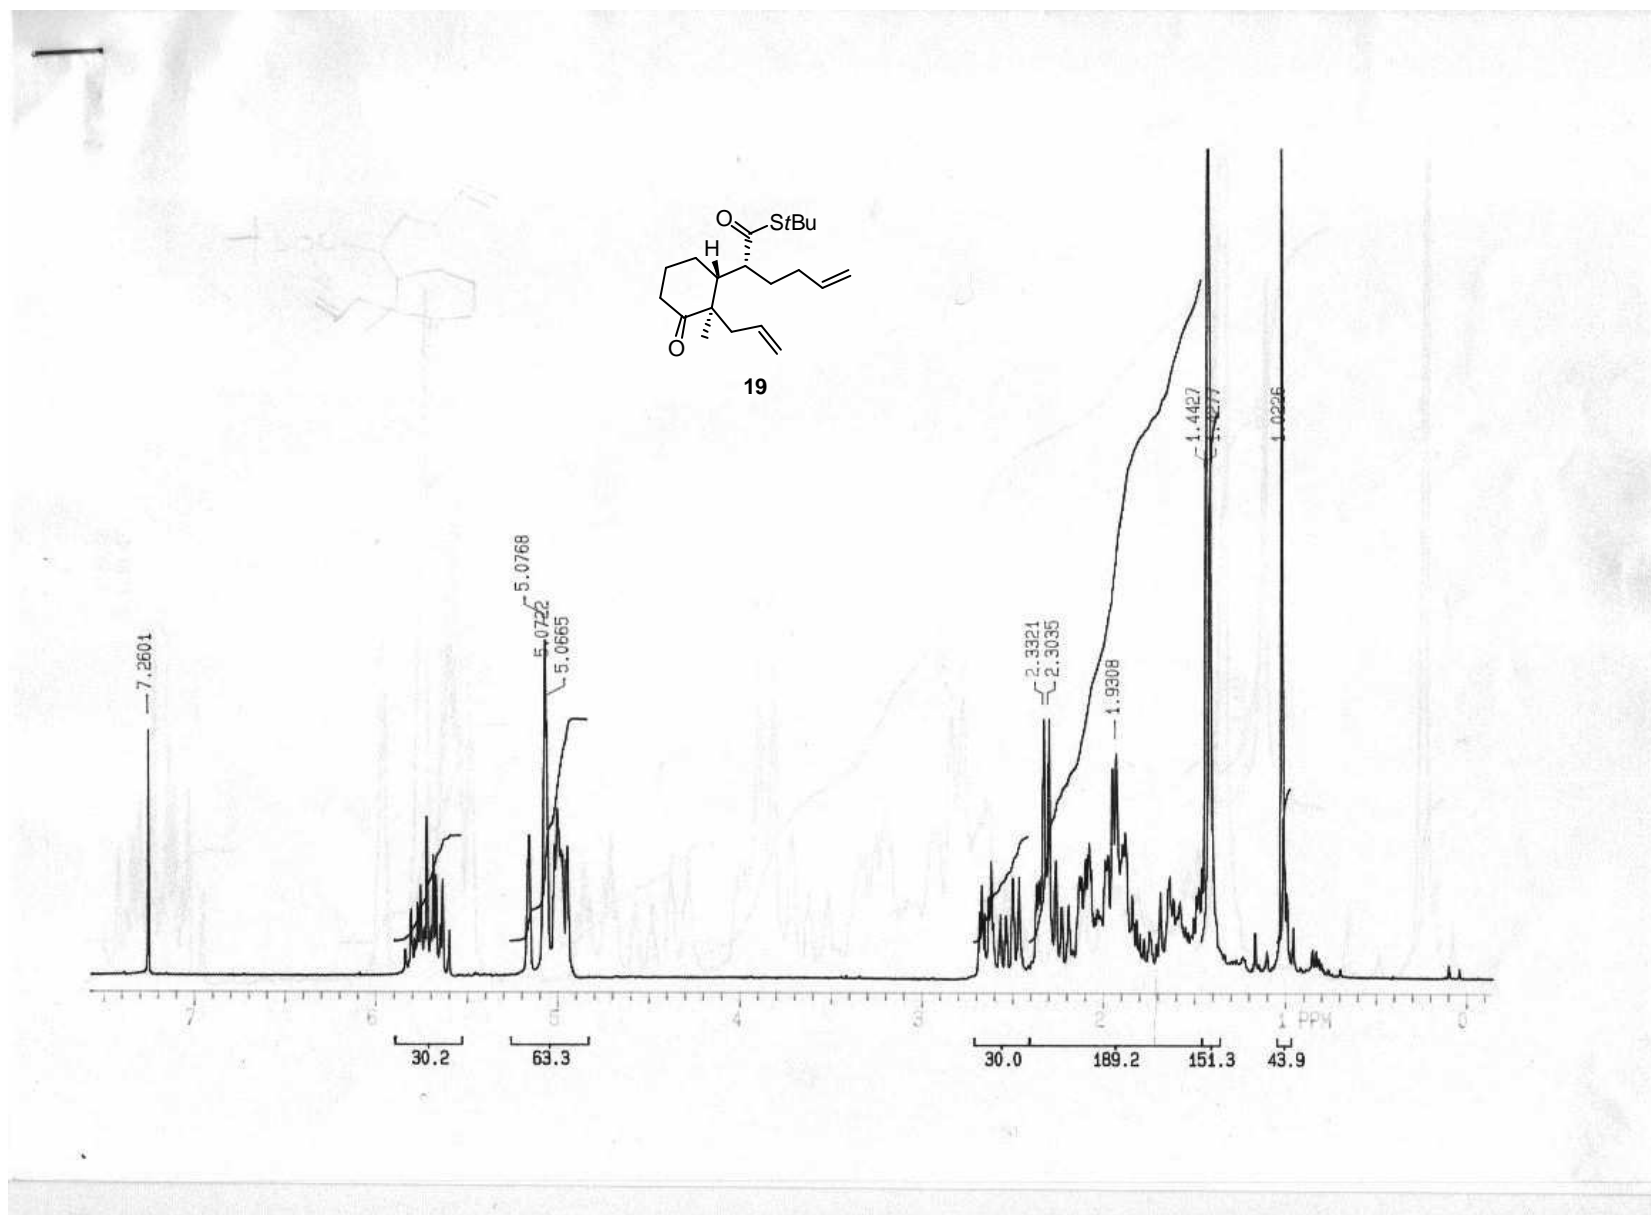



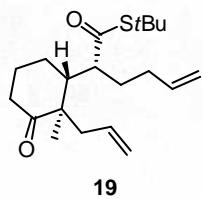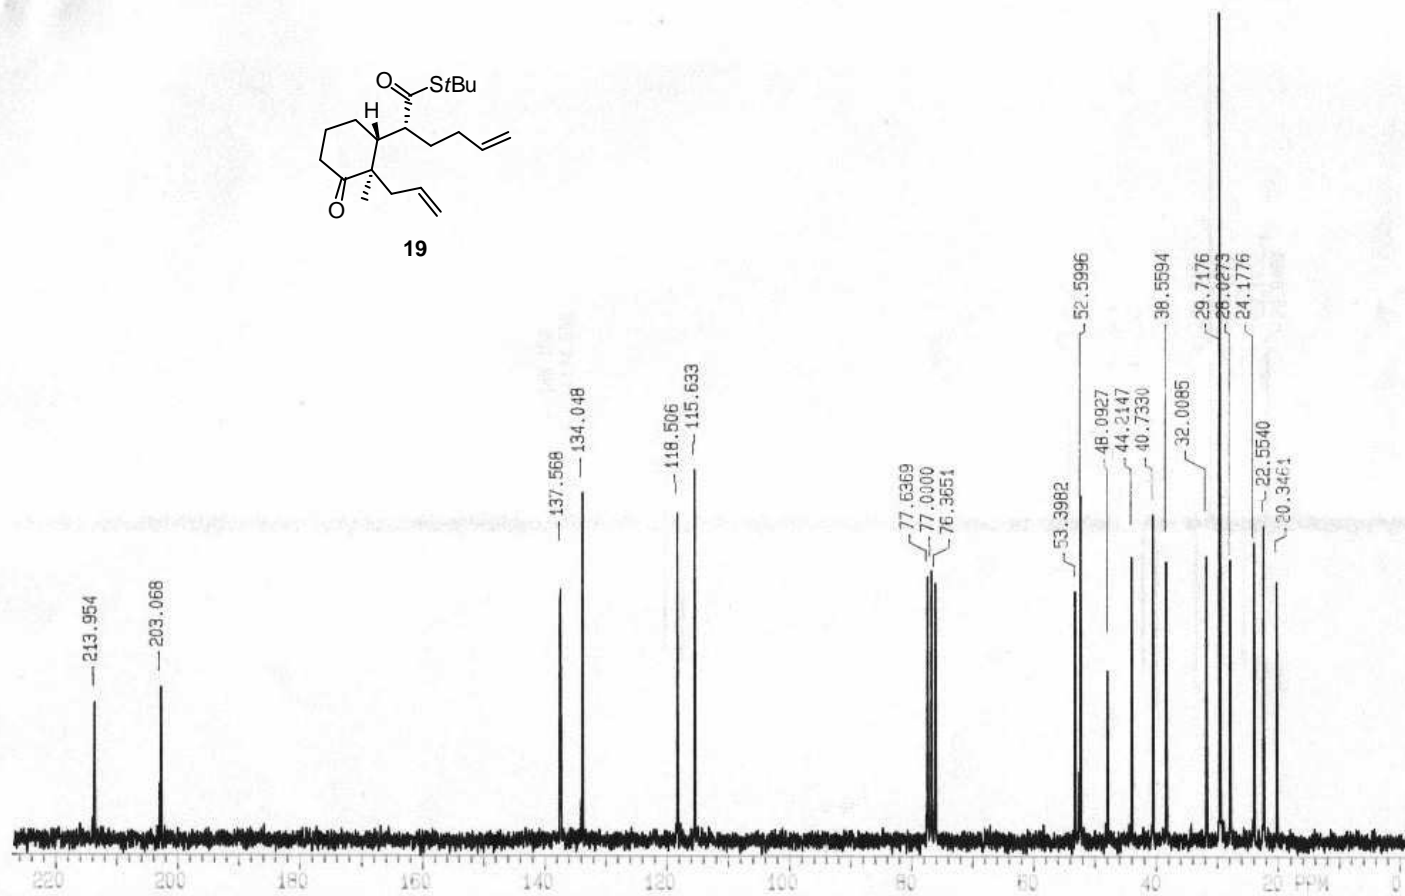

nm179chybasubstrat  
Pulse Sequence: s2pu1  
Solvent: CDCl3  
Ambient temperature  
GENI1-200BB "nmr200"

Relax. delay 0.100 sec  
Pulse 30.0 degrees  
Acq. time 3.151 sec  
Width 2600.0 Hz  
68 repetitions  
OBSERVE H1, 199.9750735 MHz  
DATA PROCESSING  
FT size 32768  
Total time 0 min, 0 sec

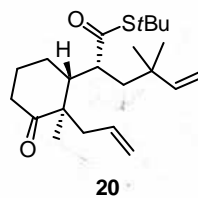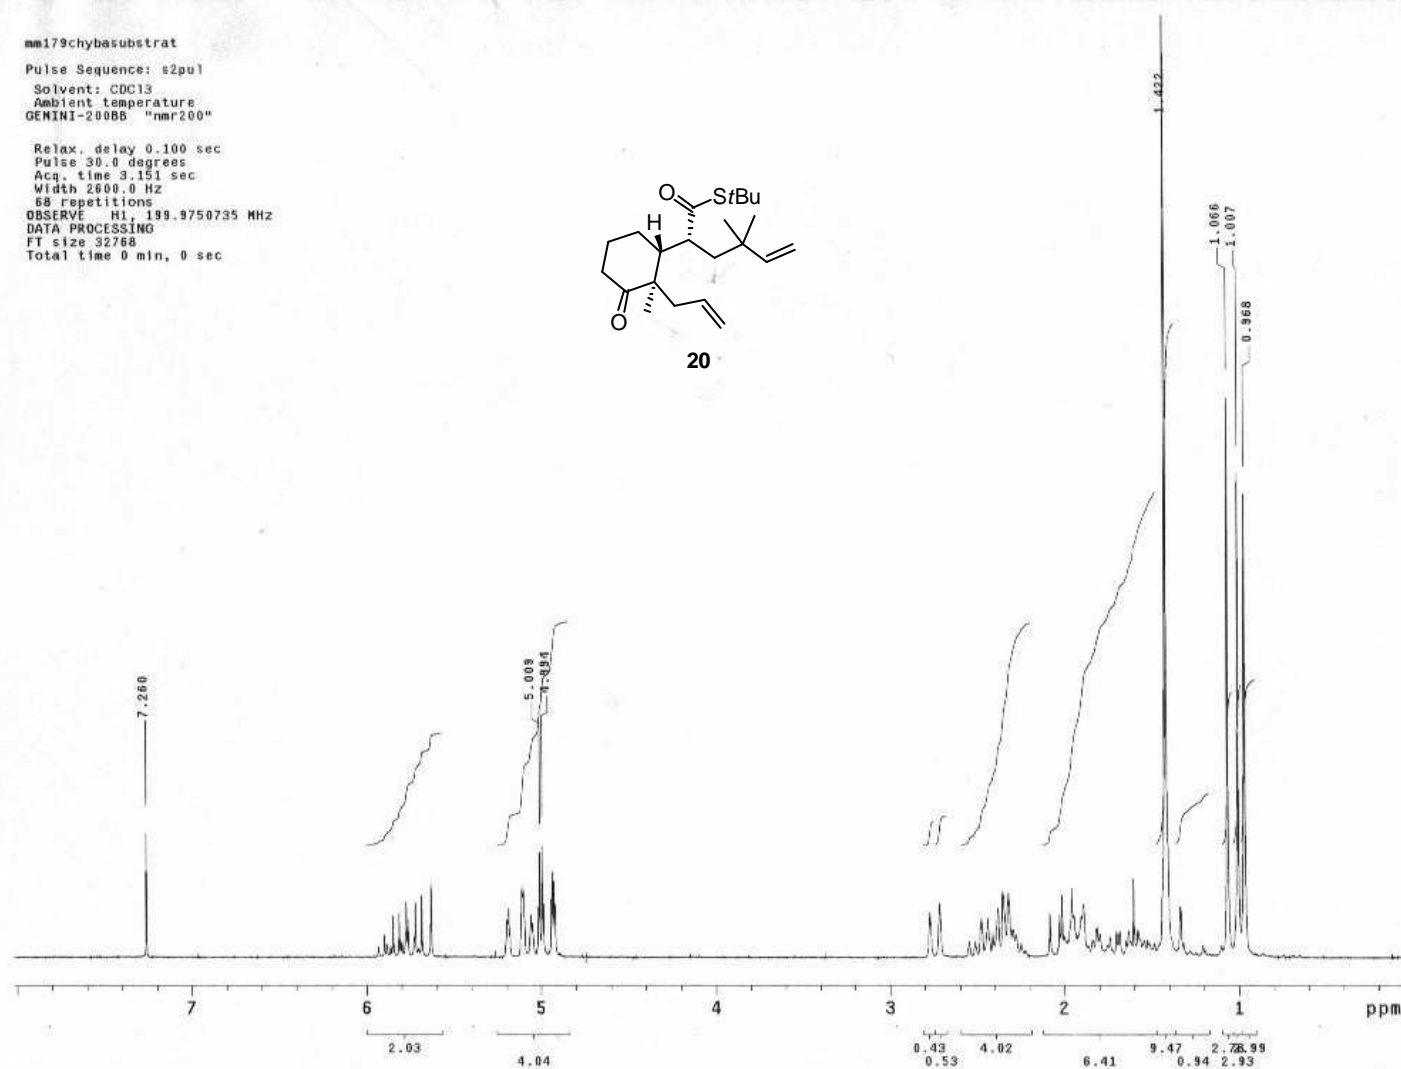

nm173

Pulse Sequence: s2pul  
Solvent: CDCl3  
Ambient temperature  
GERINI-2008B "nmr200"

Relax. delay 2.000 sec  
Pulse 48.0 degrees  
Acq. time 2.000 sec  
Width 15500.0 Hz  
256 repetitions  
OBSERVE C13, 50.2837725 MHz  
DECOUPLE H1, 199.9761736 MHz  
Power 38 dB  
continuously On  
WALTZ-16 modulated  
DATA PROCESSING  
Line broadening 1.0 Hz  
FT size 131072  
Total time 118 hr, 45 min, 39 sec

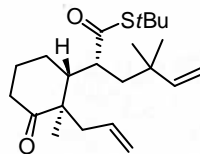

20

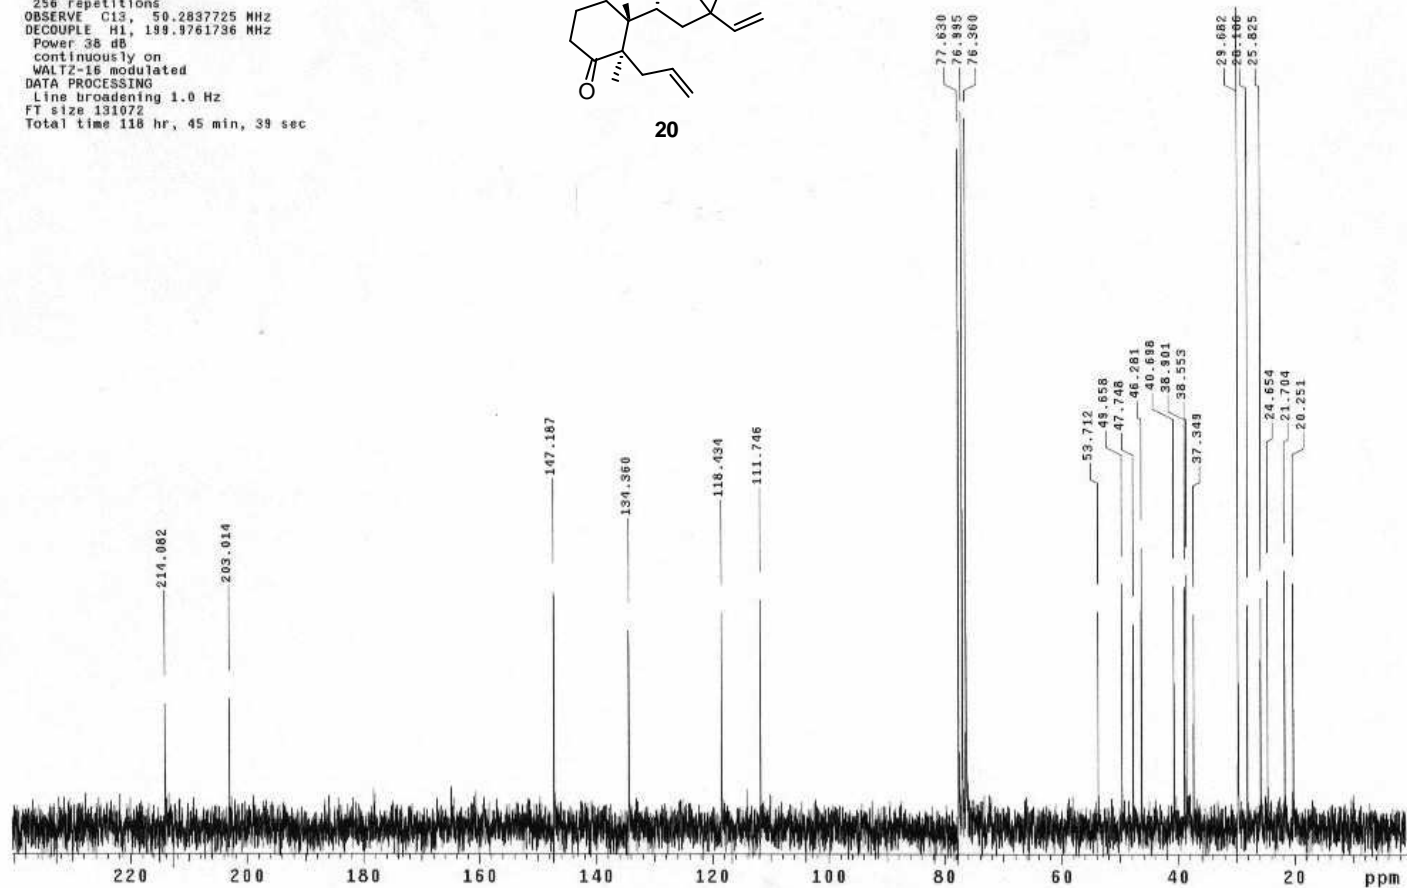

M. Michalak  
VIJ MM 411  
ZESPOL\_18/vijmm411  
Pulse Sequence: s2pul  
Solvent: CDCl3  
Ambient temperature  
Mercury-400BB "SchiffSUN"  
Relax. delay 1.000 sec  
Pulse 33.3 degrees  
Acq. time 4.736 sec  
Width 4504.5 Hz  
256 repetitions  
OBSERVE H1, 400.0418341 MHz  
DATA PROCESSING  
FT size 65536

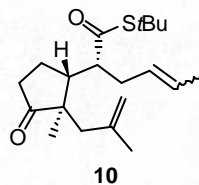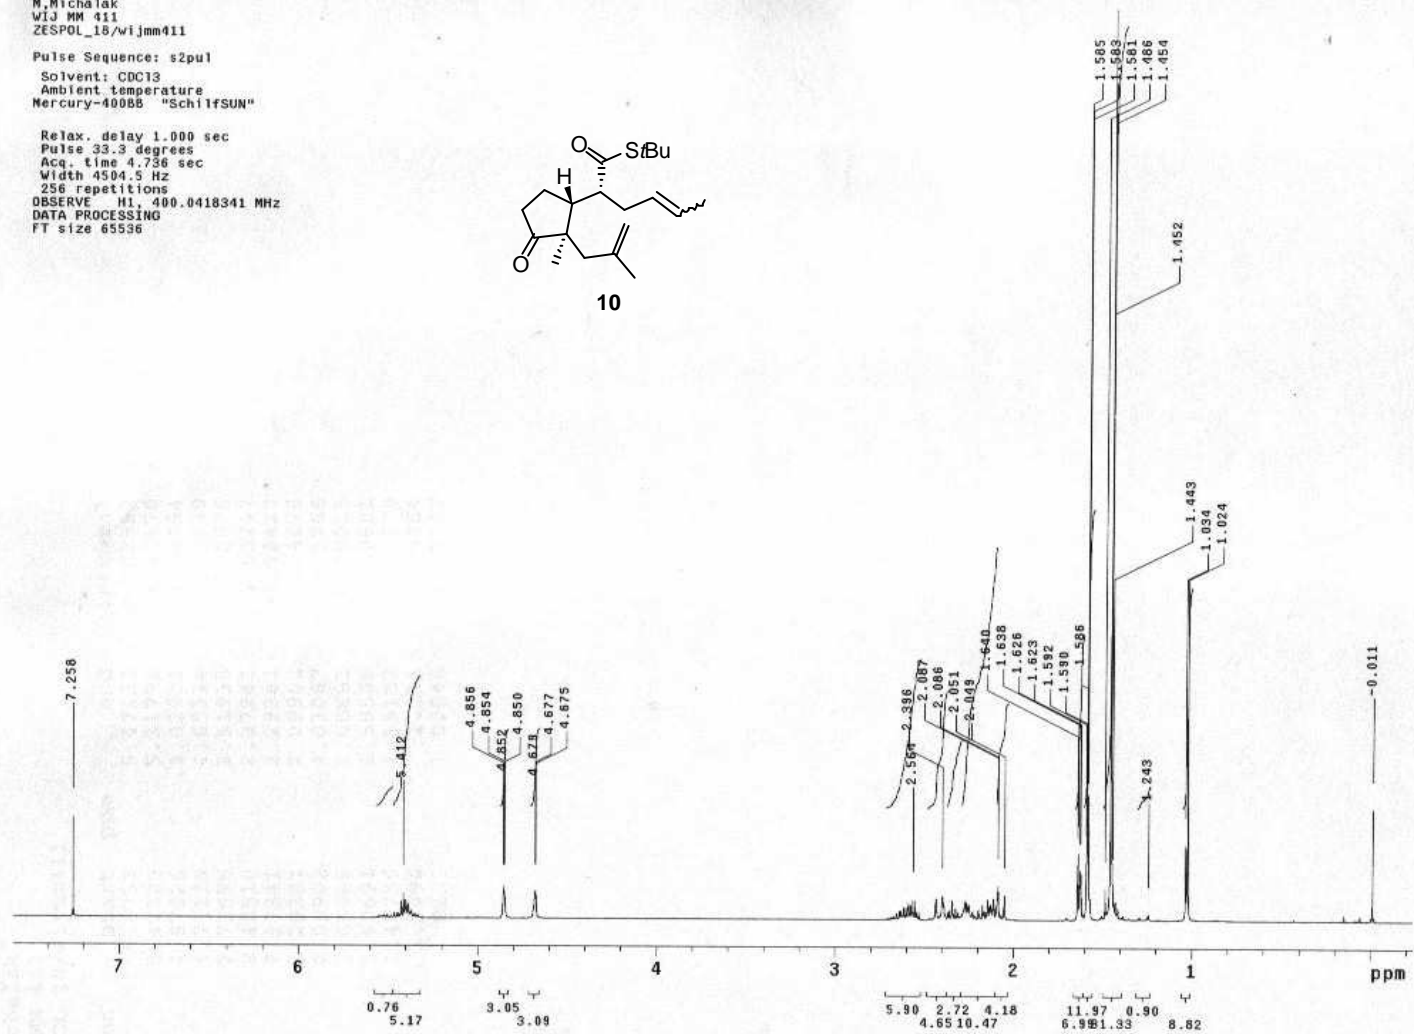

mm378wyzs2yrf-c  
Pulse Sequence: szpul  
Solvent: CDCl3  
Ambient temperature  
GENI1-200BB "nmr200"

Relax. delay 2.000 sec  
Pulse 45.0 degrees  
Acq. time 1.459 sec  
Width 16000.0 Hz  
432 repetitions  
OBSERVE C13, 50.2827729 MHz  
DECOUPLE H1, 199.9717975 MHz  
Power 38 dB  
Continuously on  
WALTZ-16 modulated  
DATA PROCESSING  
Line broadening 1.0 Hz  
FT size 65536

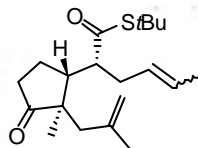

10

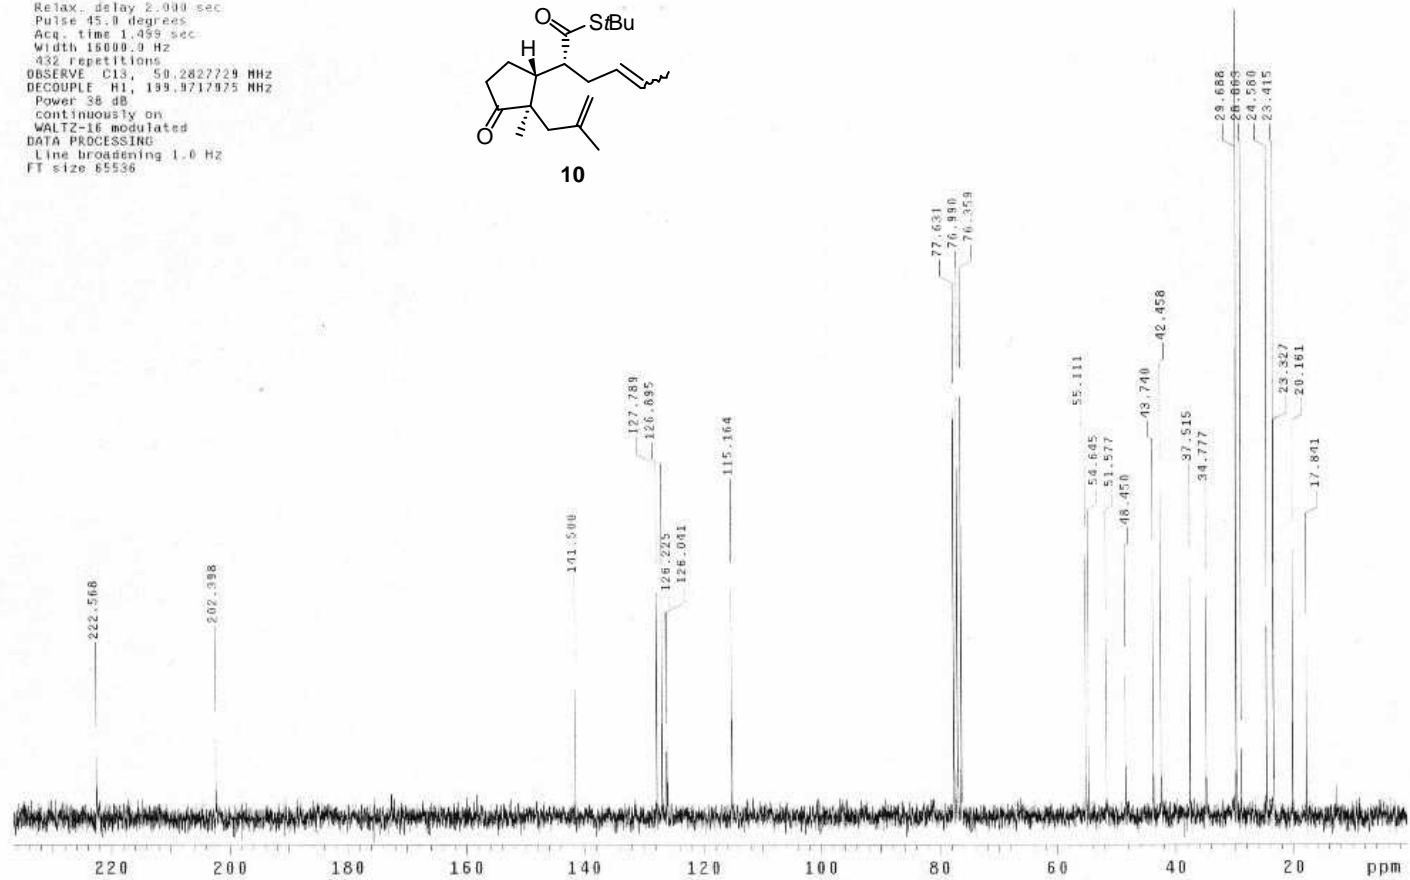

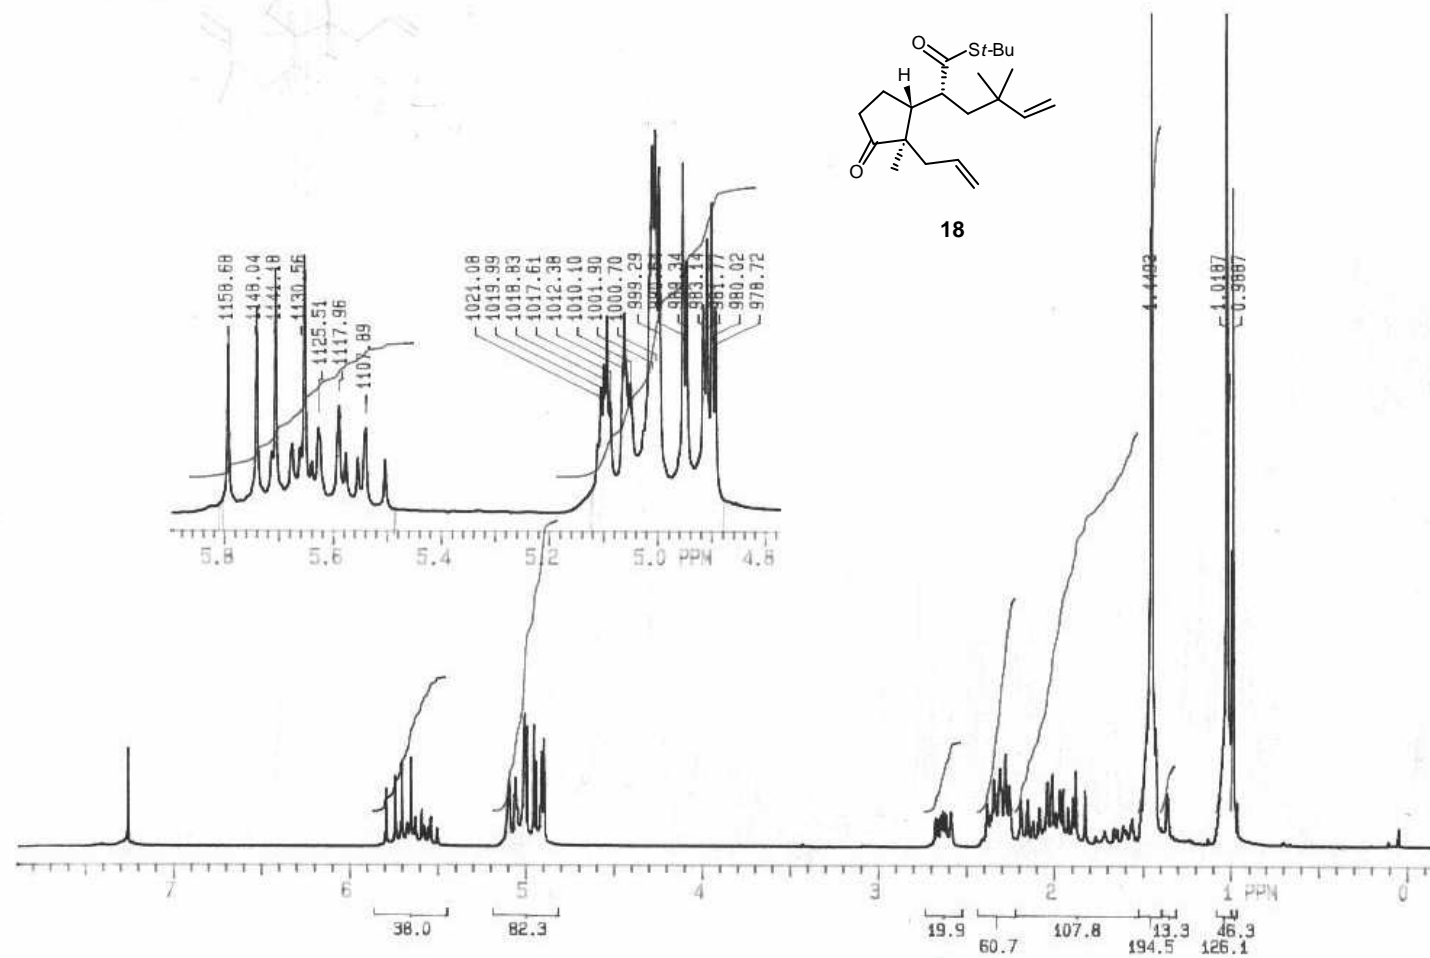

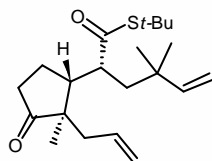

**18**

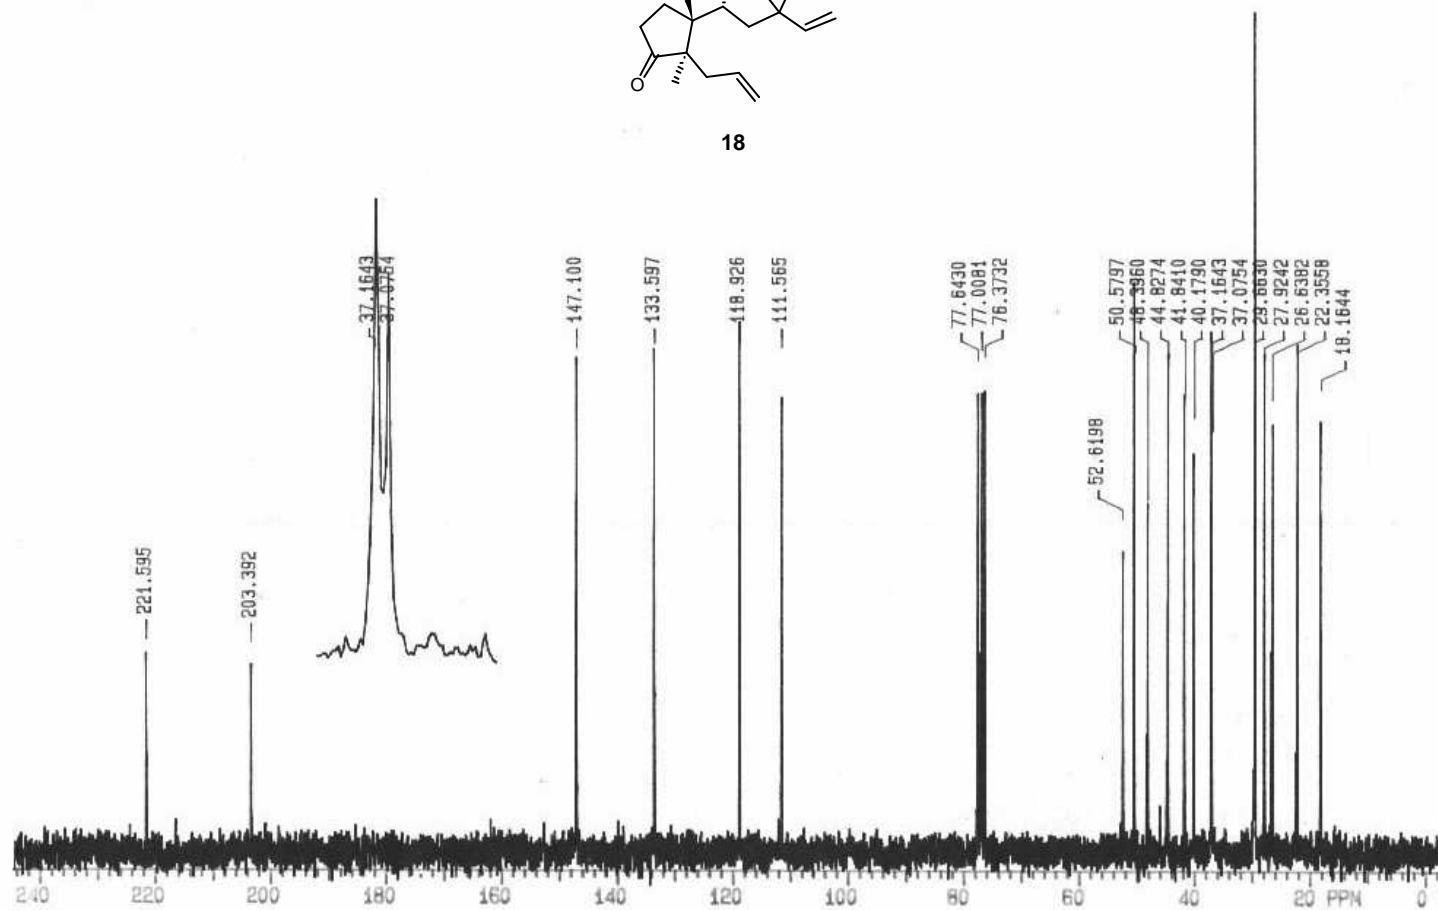

mm114-wyzszy Rf

Pulse Sequence: s2pul

Solvent: CDCl<sub>3</sub>  
Ambient temperature  
GEMINI-200BB "nmr200"

Relax. delay 0.100 sec  
Pulse 30.0 degrees  
Acq. time 3.151 sec  
Width 2600.0 Hz  
76 repetitions  
OBSERVE H1, 199.9750735 MHz  
DATA PROCESSING  
FT size 32768  
Total time 30 min, 34 sec

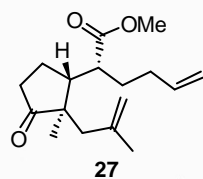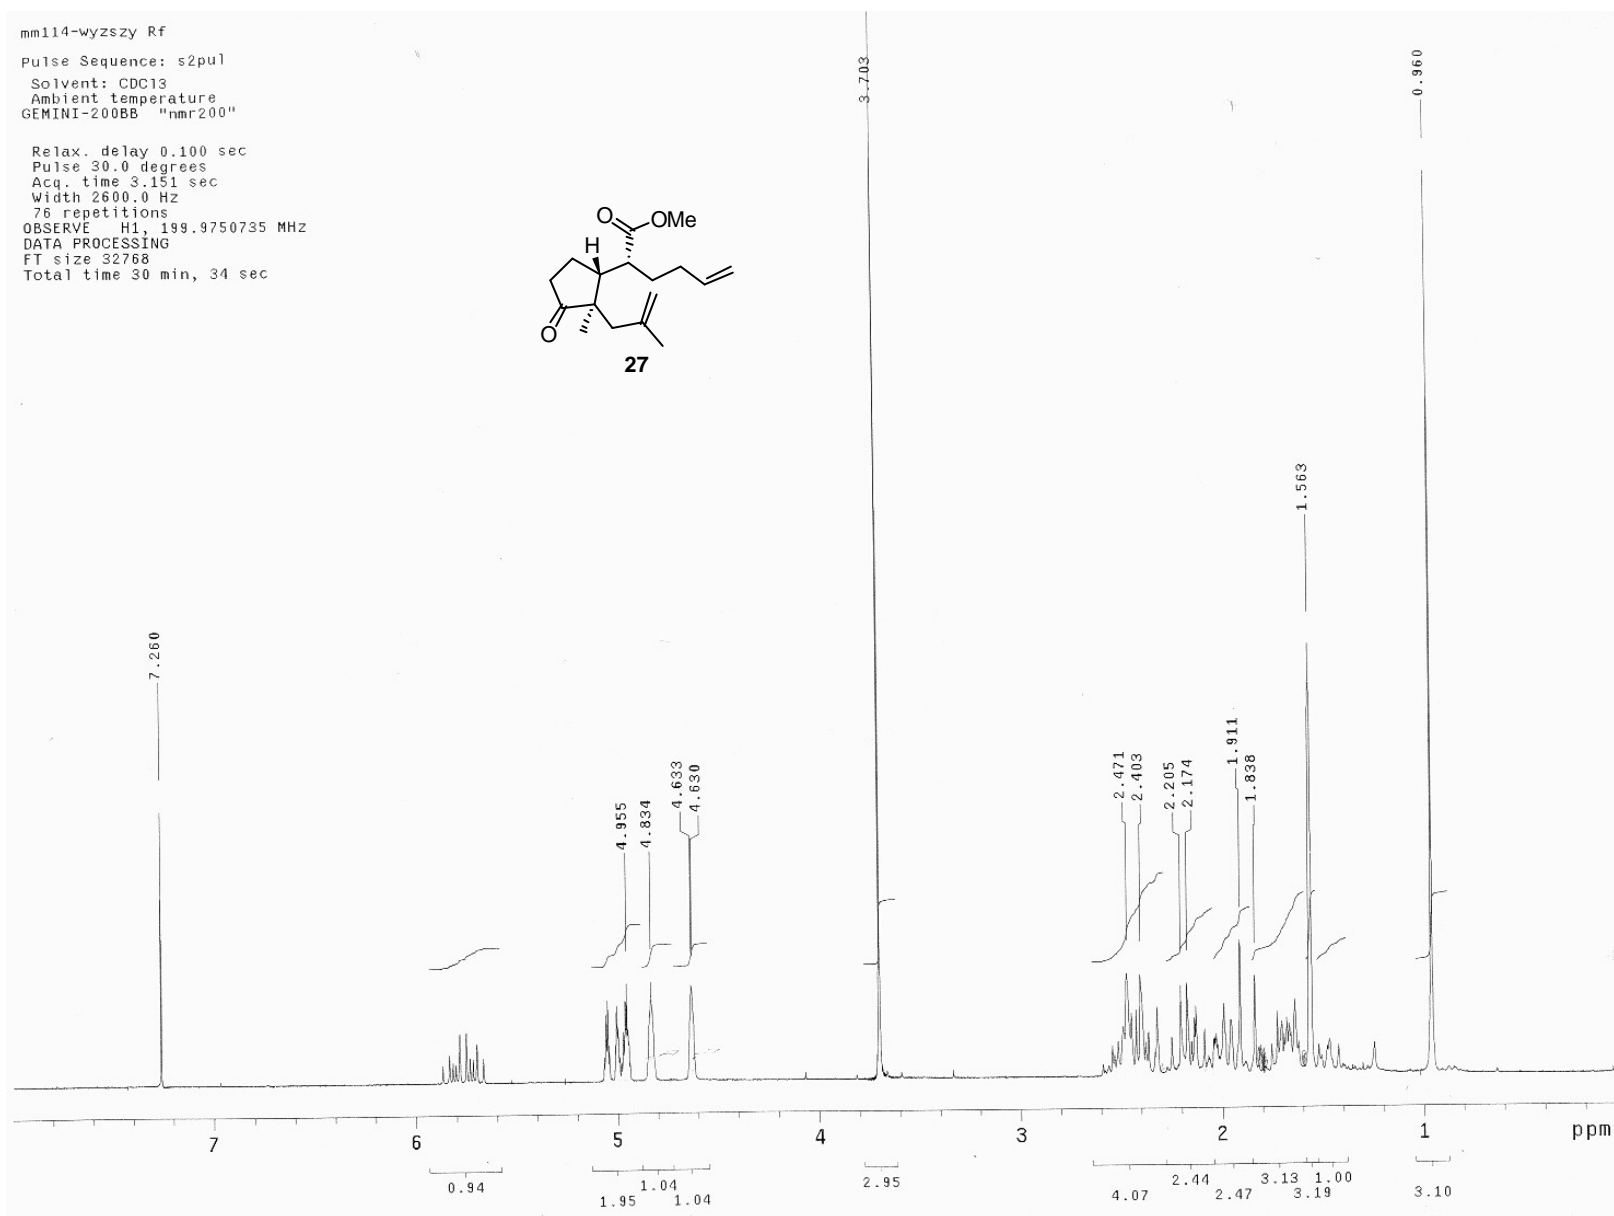



mm114-wyzszyRf

Pulse Sequence: s2pu1

Solvent: CDC13

Ambient temperature

GEMINI-200BB "nmr200"

Relax. delay 2.000 sec

Pulse 48.0 degrees

Acq. time 2.000 sec

Width 15500.0 Hz

512 repetitions

OBSERVE C13, 50.2837730 MHz

DECOUPLE H1, 199.9761736 MHz

Power 38 dB

continuously on

WALTZ-16 modulated

DATA PROCESSING

Line broadening 1.0 Hz

FT size 131072

Total time 23 hr, 4 min, 30 sec

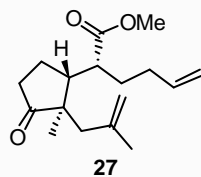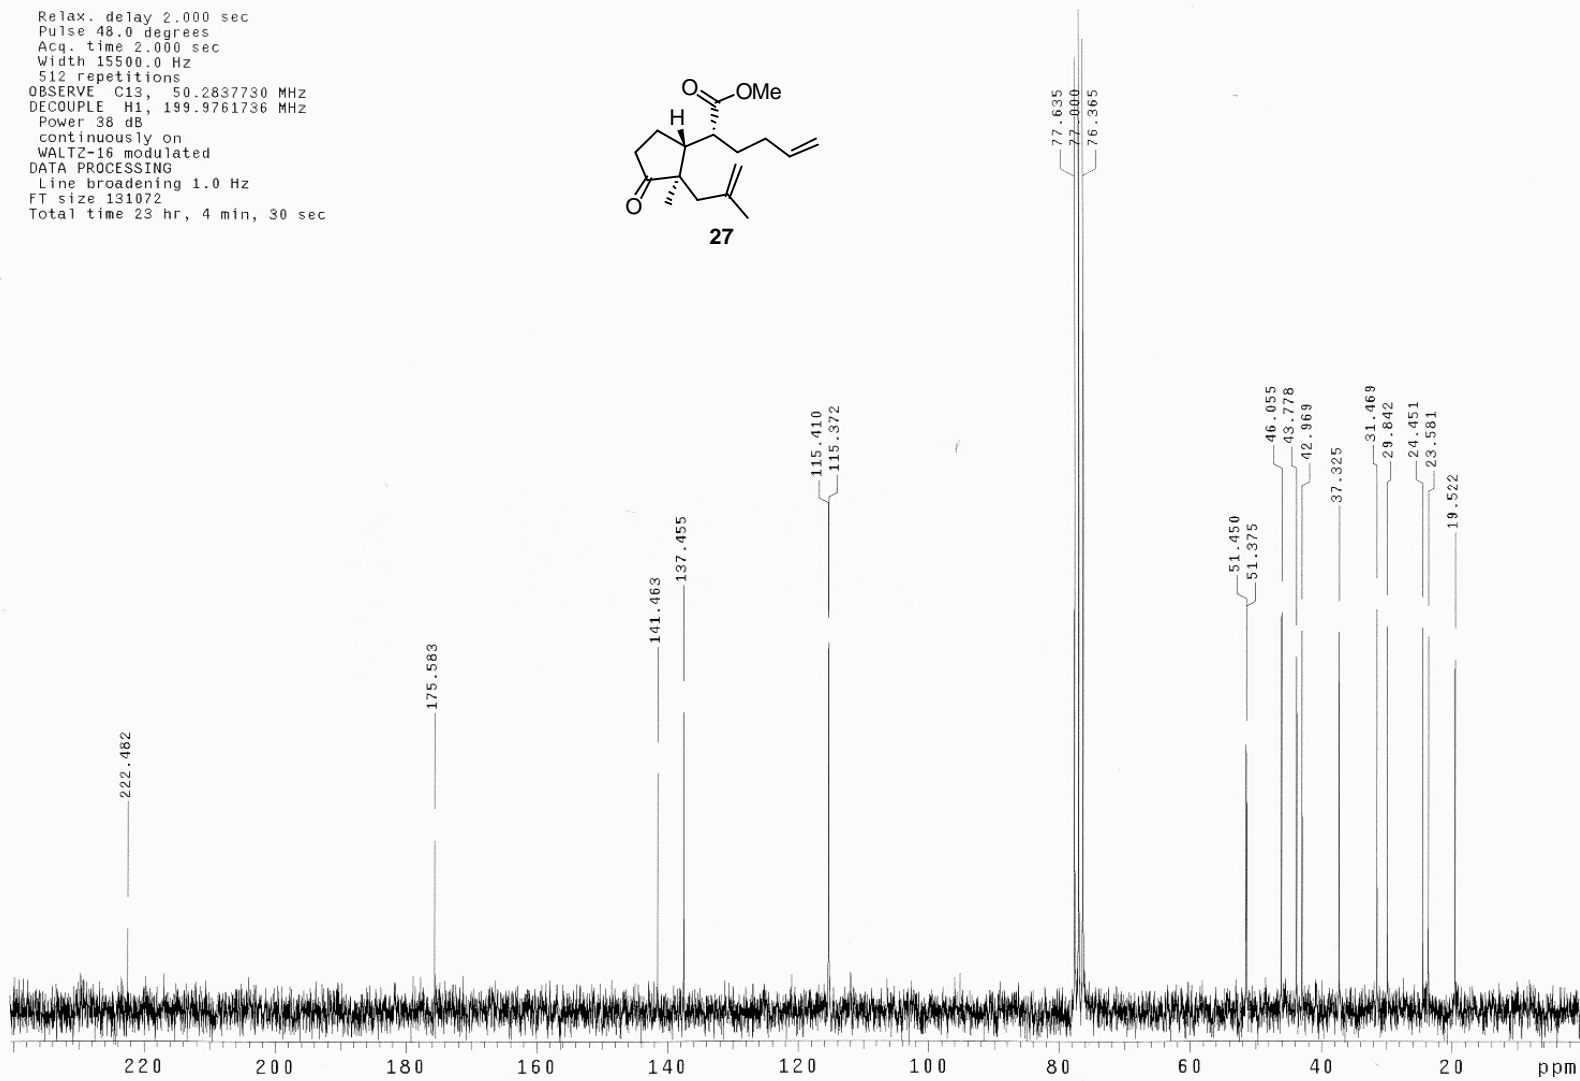

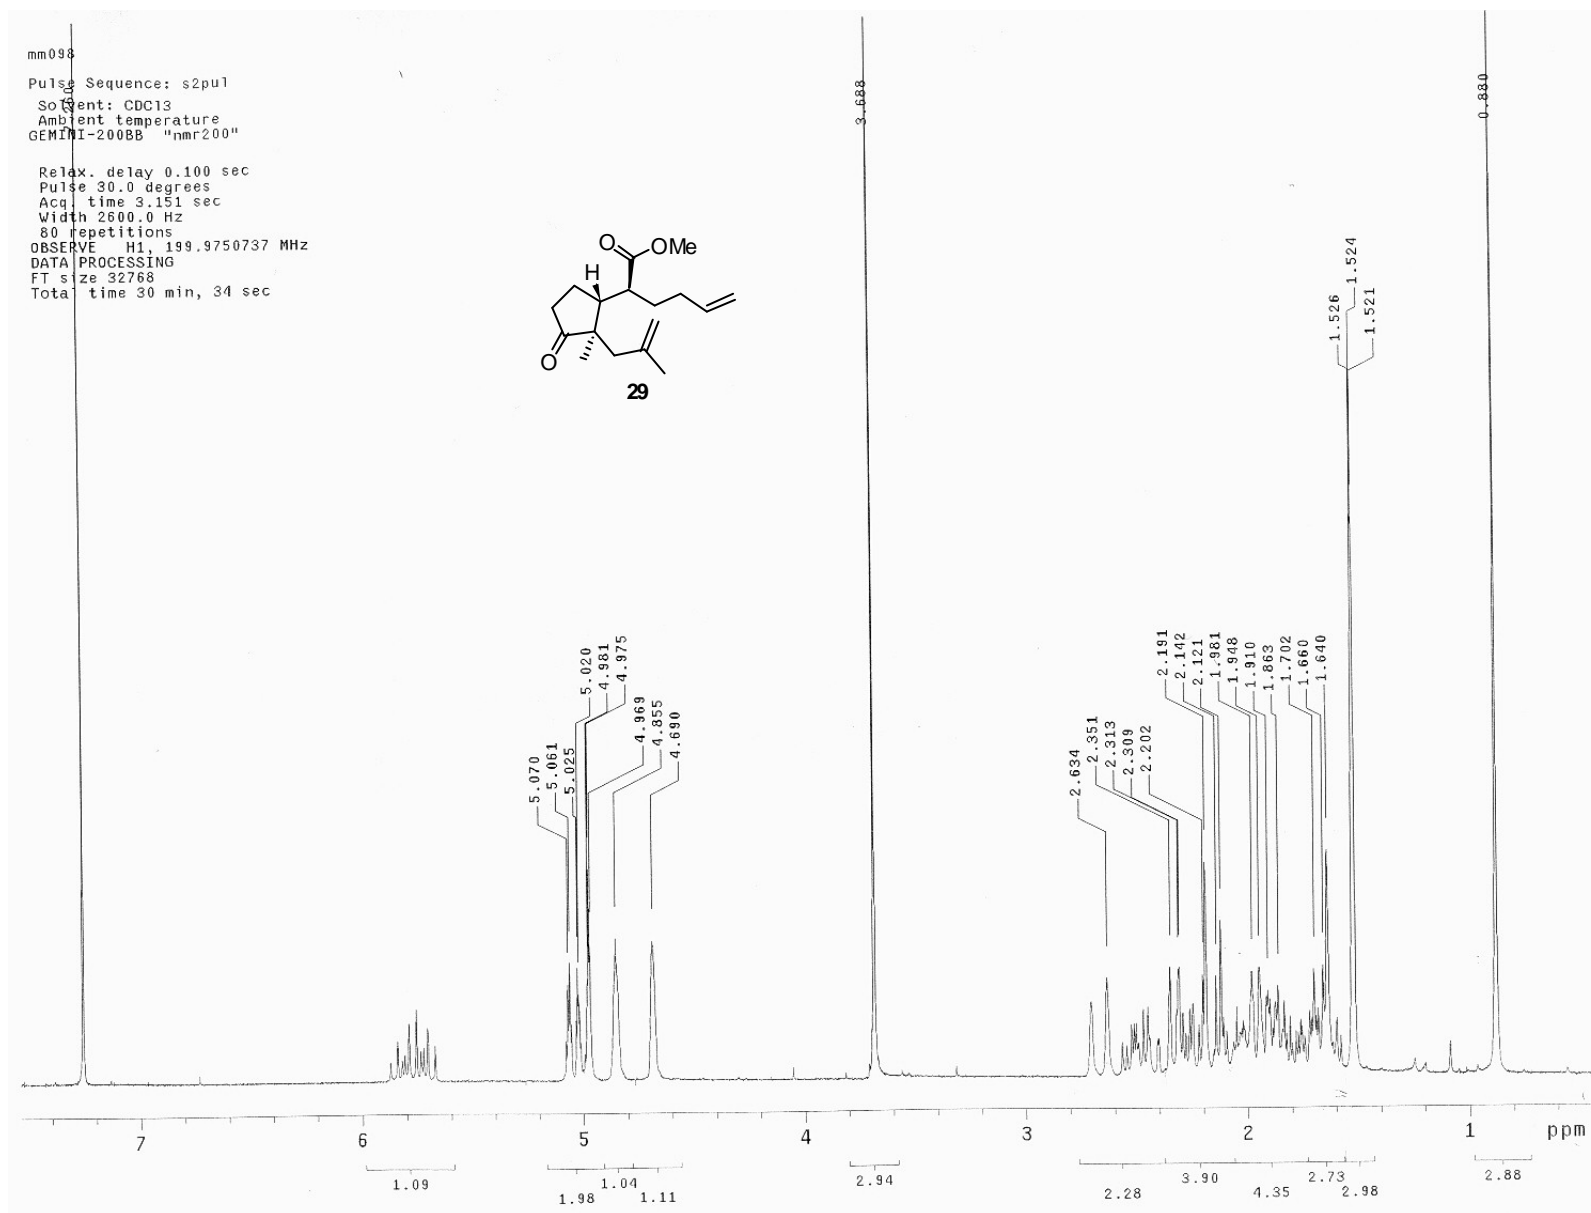

114-nizszyRf

Pulse Sequence: s2pu1

Solvent: CDCl<sub>3</sub>

Ambient temperature

GEMINI-200BB "nmr200"

Relax. delay 2.000 sec

Pulse 48.0 degrees

Acq. time 2.000 sec

Width 15500.0 Hz

416 repetitions

OBSERVE C13, 50.2837732 MHz

DECOUPLE H1, 199.9761736 MHz

Power 38 dB

continuously on

WALTZ-16 modulated

DATA PROCESSING

Line broadening 1.0 Hz

FT size 131072

Total time 23 hr, 4 min, 30 sec

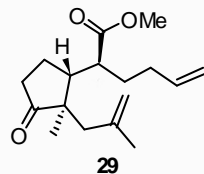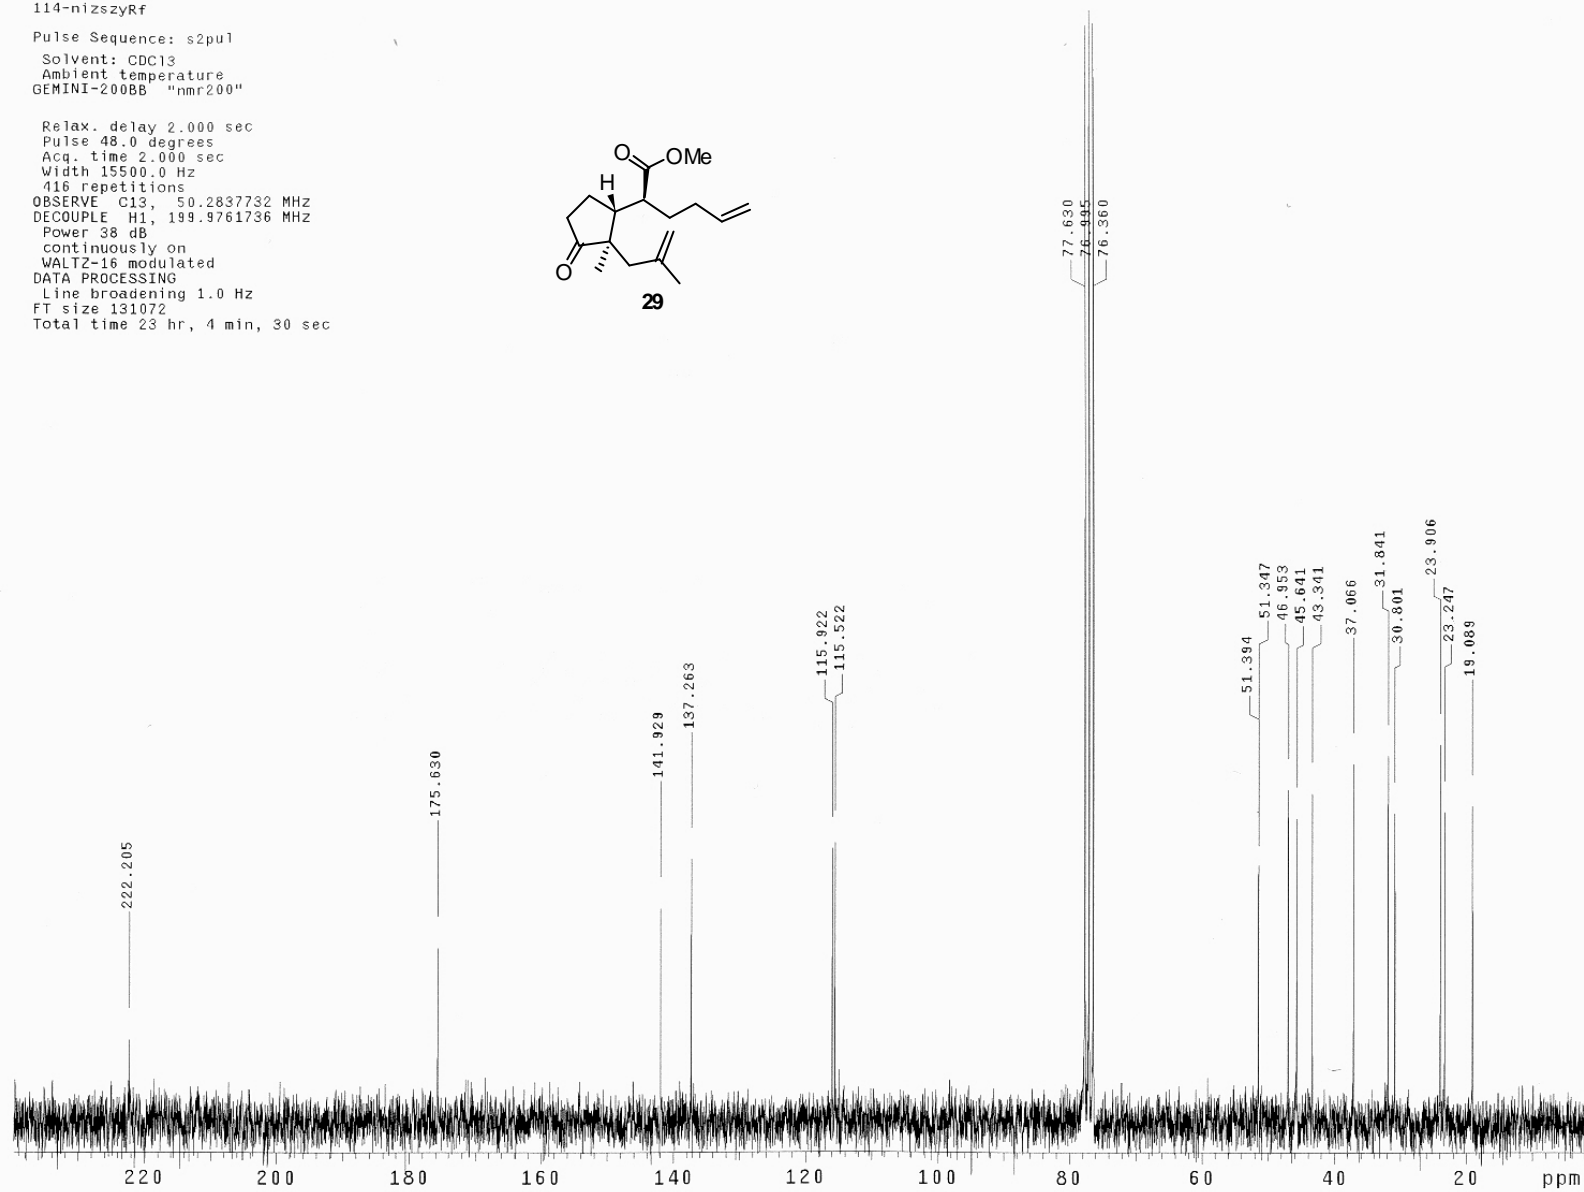

nm173  
Pulse Sequence: s2pu1  
Solvent: CDCl3  
Ambient temperature  
GEMINI-200BB "nmr200"

Relax. delay 0.100 sec  
Pulse 30.0 degrees  
Acq. time 3.151 sec  
Width 2600.0 Hz  
76 repetitions  
OBSERVE H1, 199.9750734 MHz  
DATA PROCESSING  
FT size 32768  
Total time 30 min, 34 sec

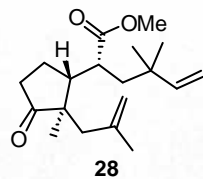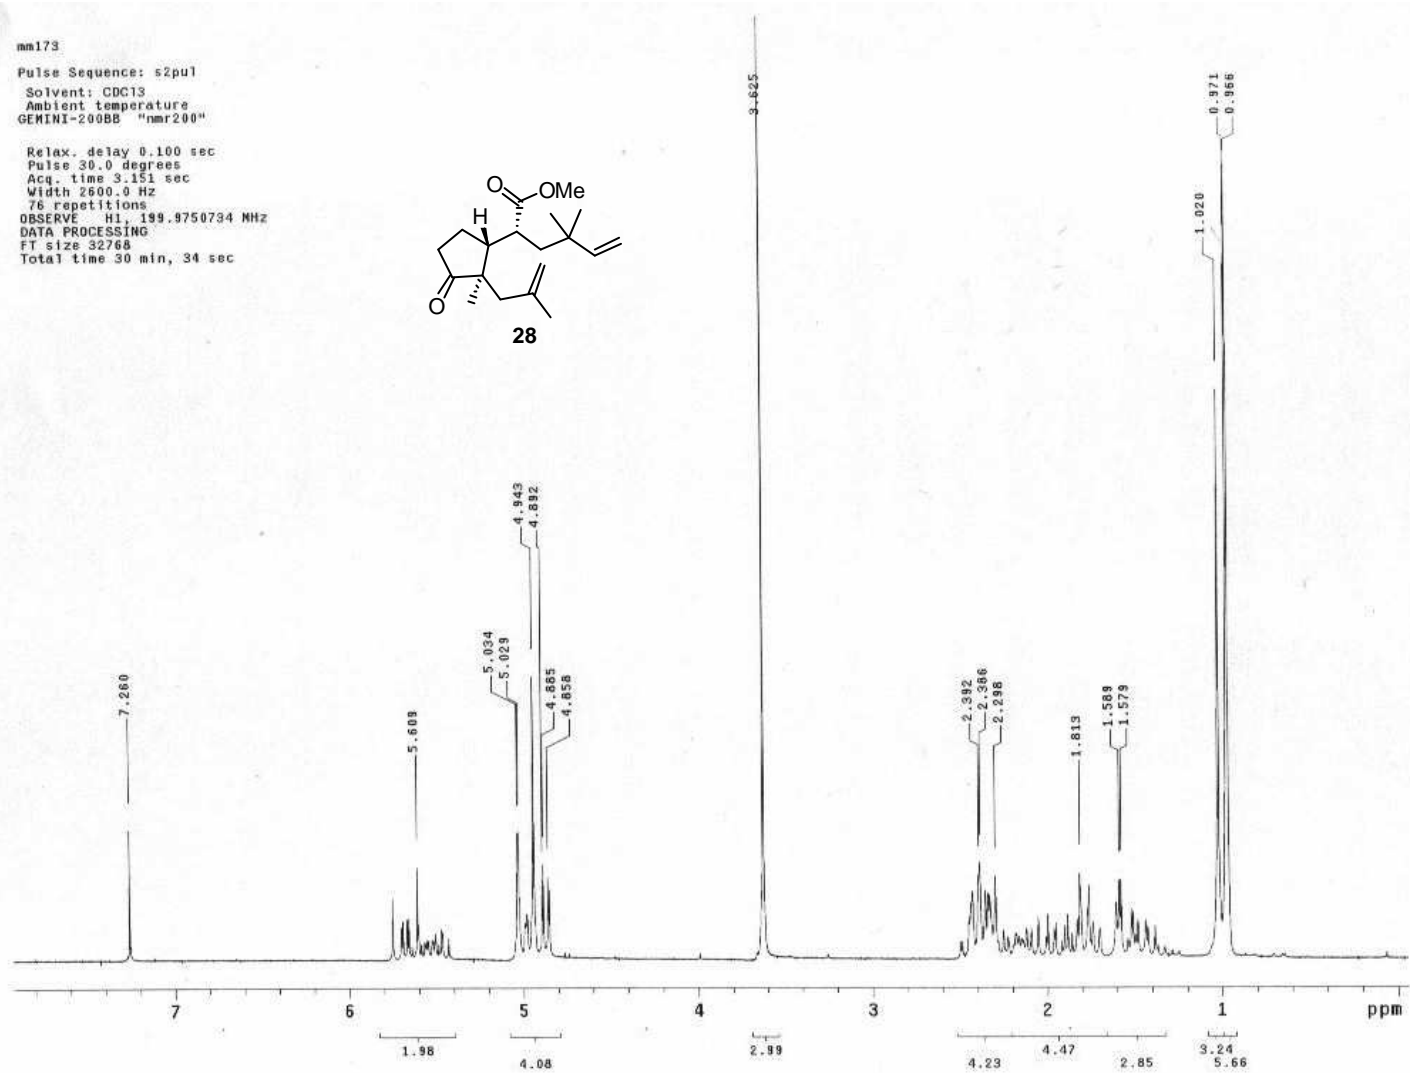

nm173  
Pulse Sequence: s2pu1  
Solvent: CDCl3  
Ambient temperature  
GEMINI-200BB "nmr200"  
  
Relax. delay 2.000 sec  
Pulse 48.0 degrees  
Acq. time 2.000 sec  
Width 15500.0 Hz  
272 repetitions  
OBSERVE C13, 50.2837725 MHz  
DECOUPLE H1, 199.9761736 MHz  
Power 38 dB  
continuously on  
WALTZ-16 modulated  
DATA PROCESSING  
Line broadening 1.0 Hz  
FT size 131072  
Total time 118 hr, 45 min, 39 sec

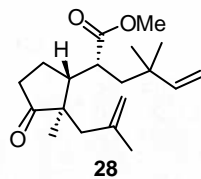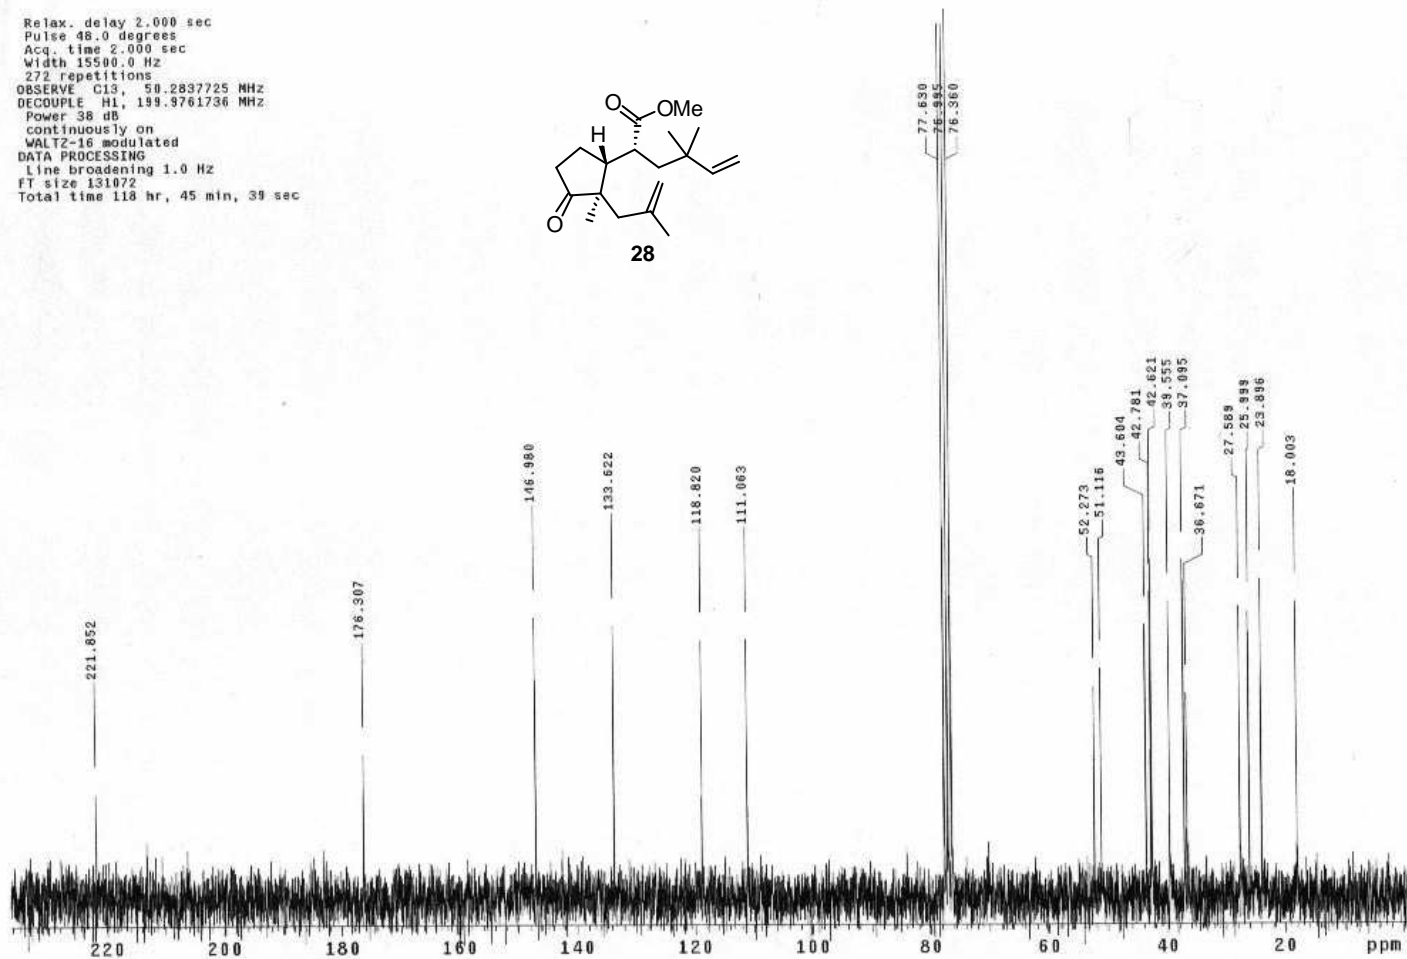

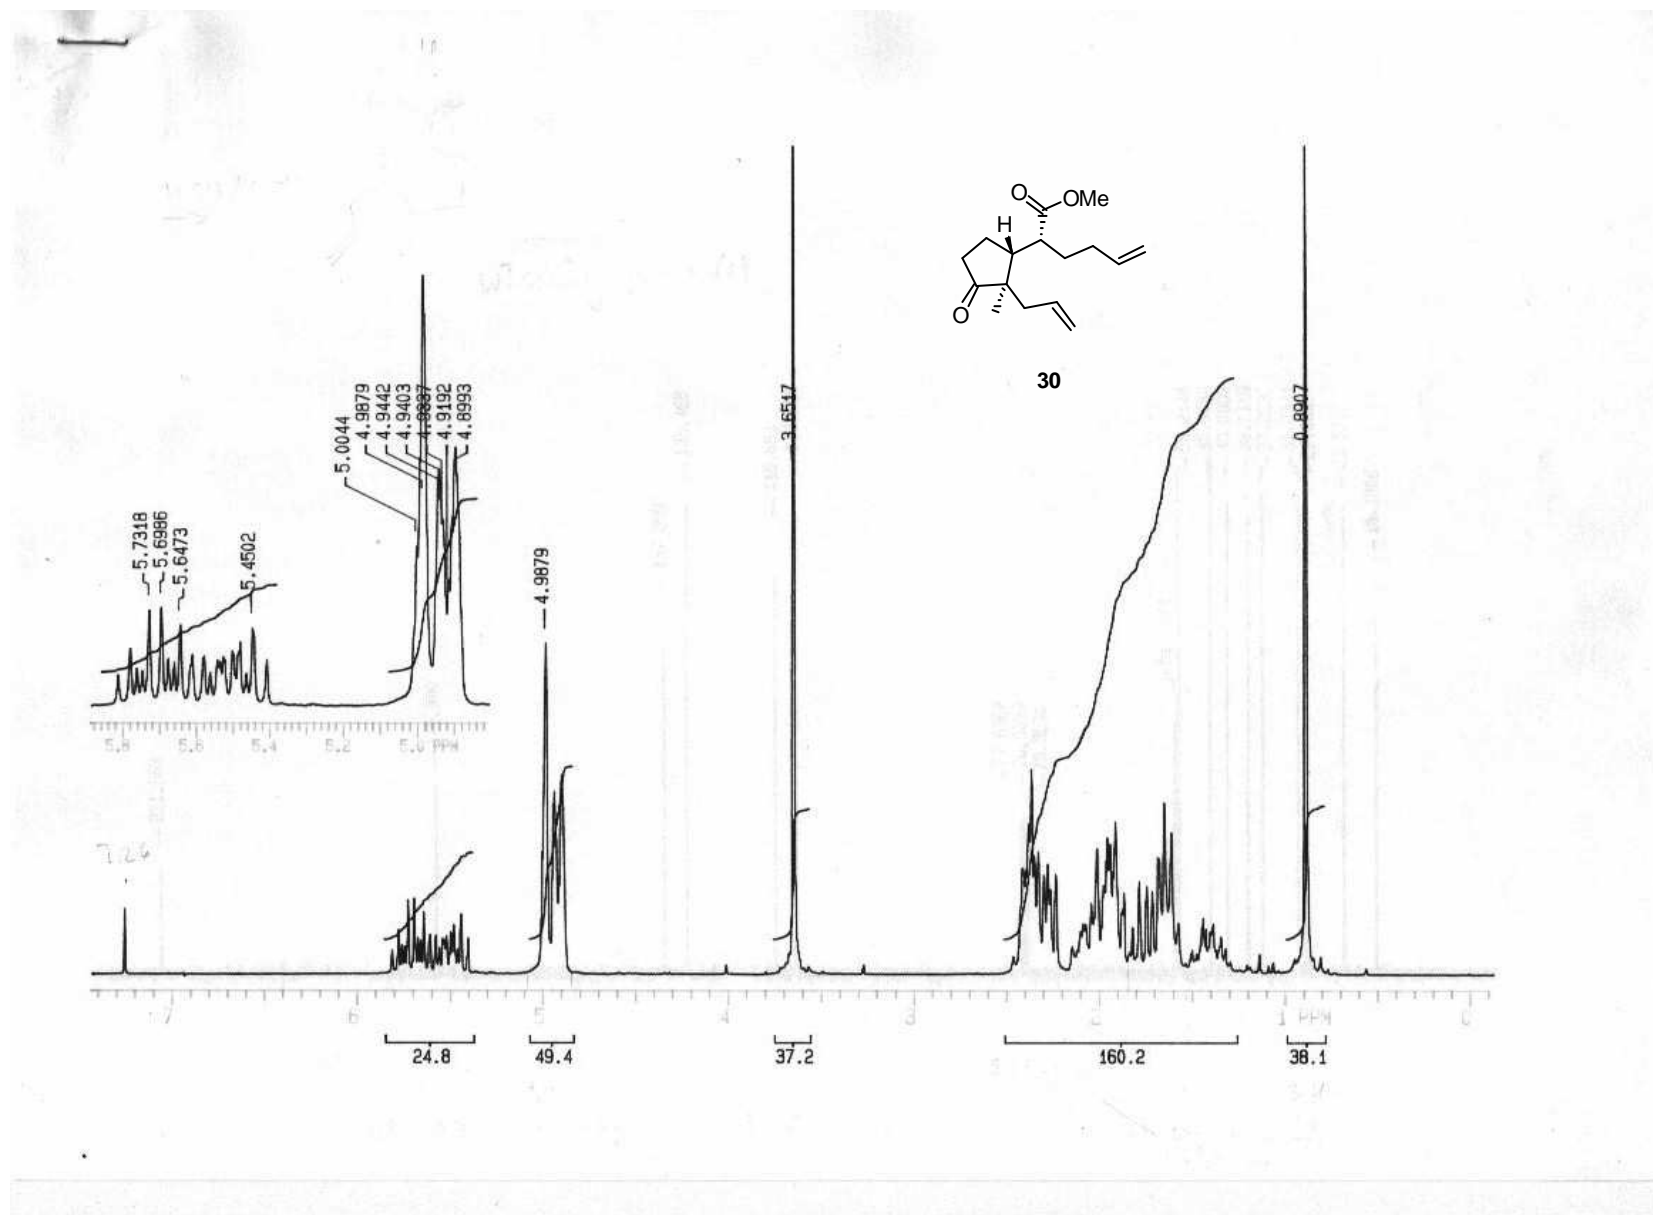

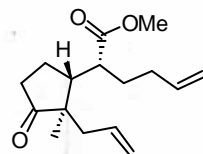

30

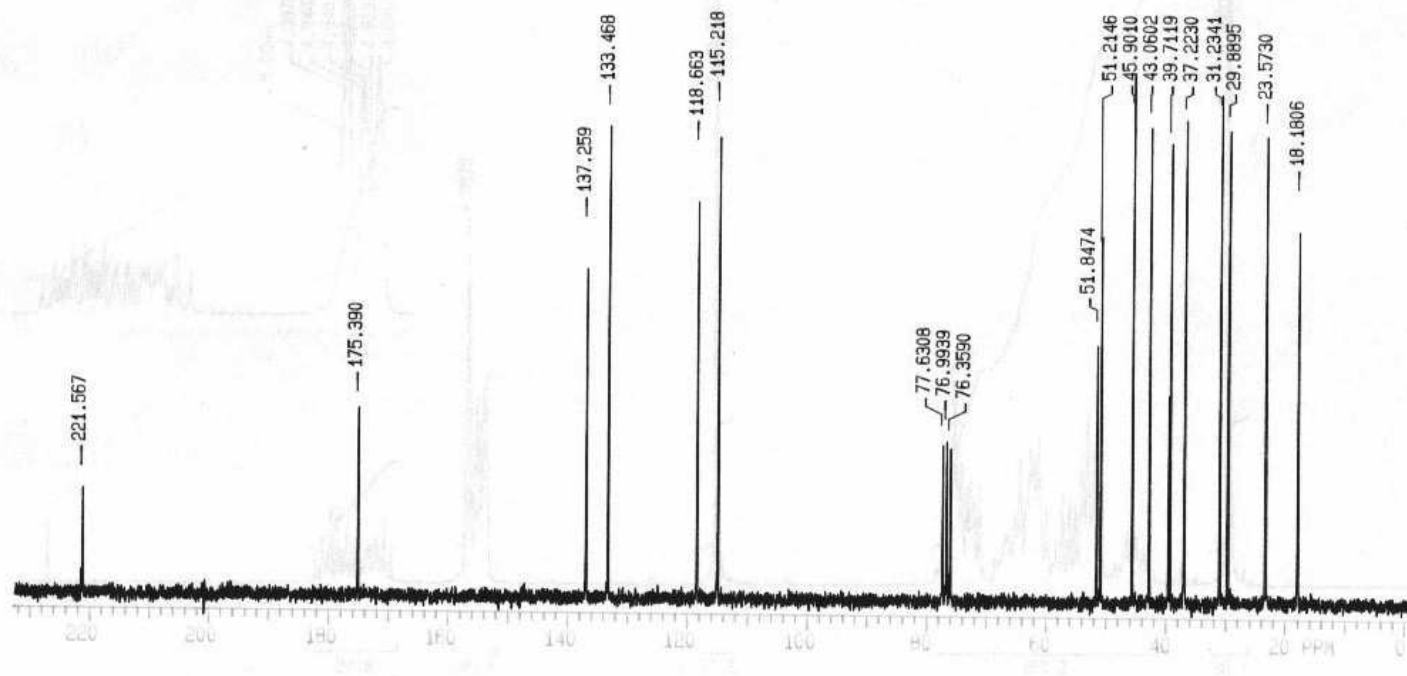

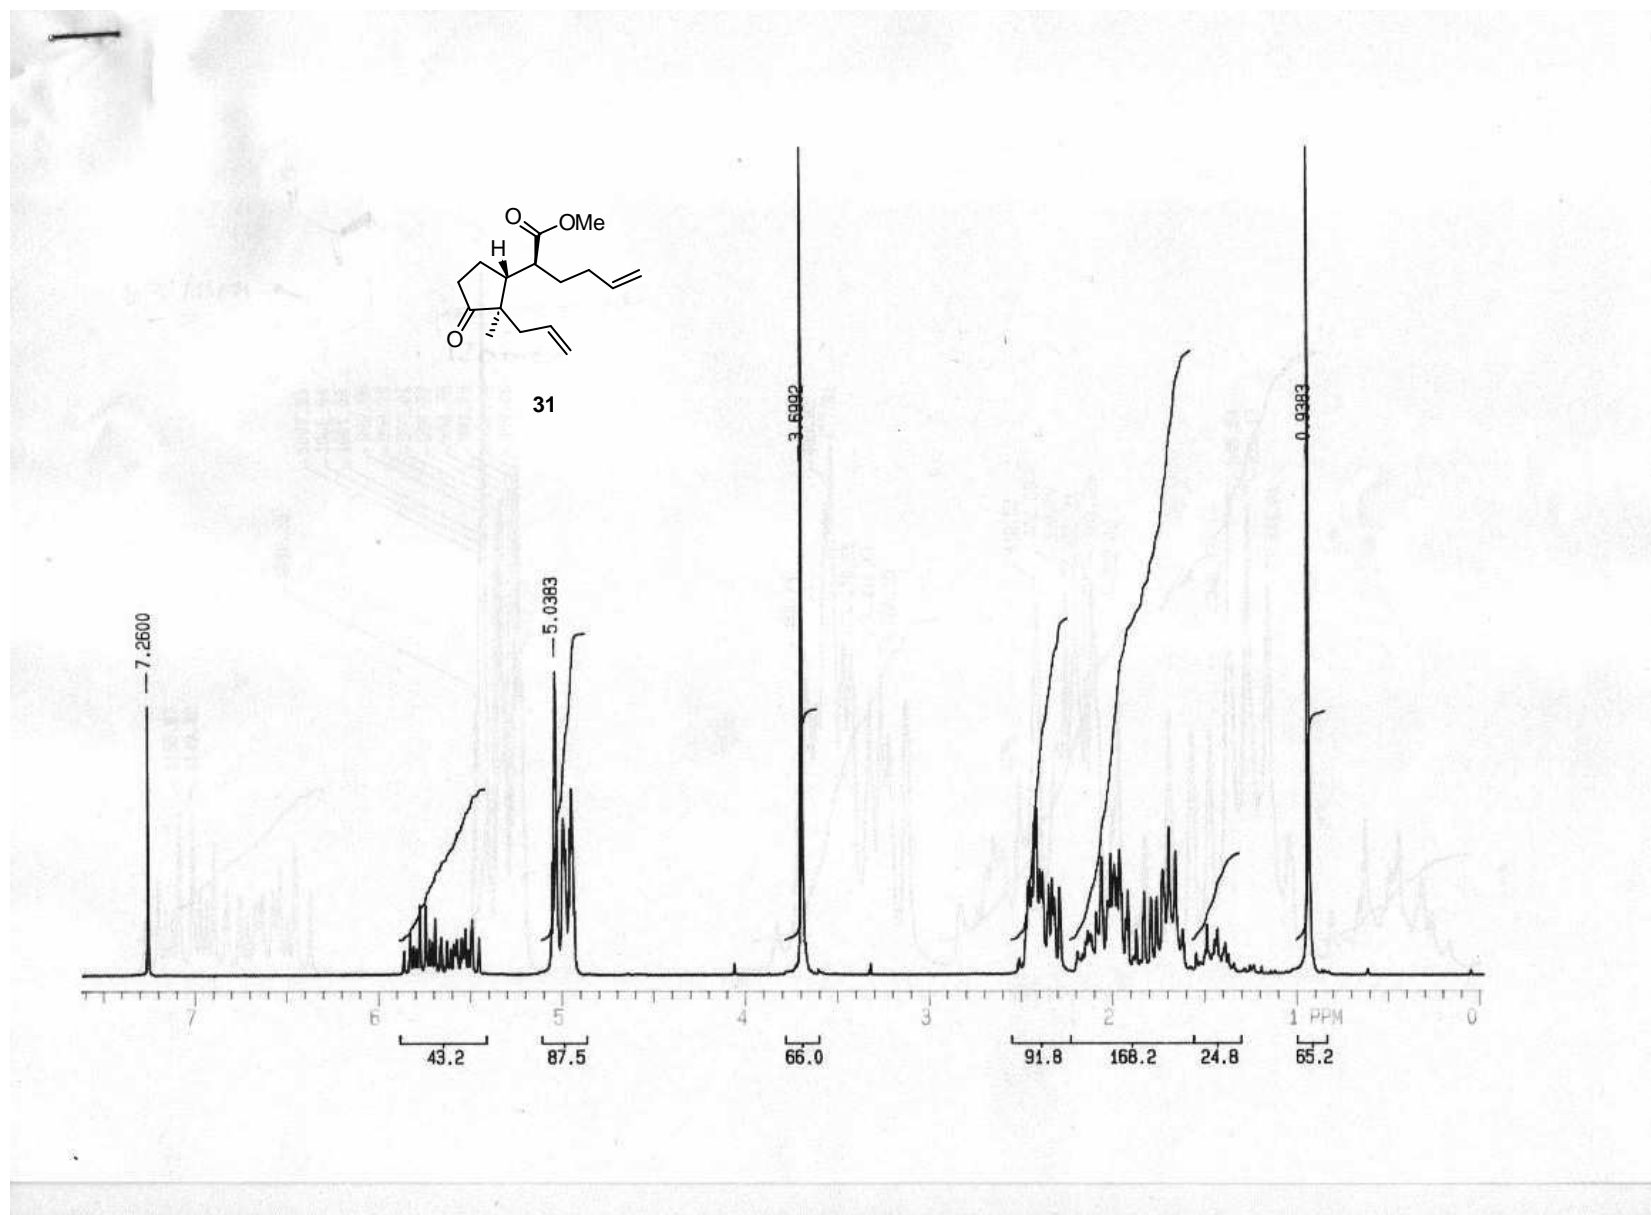



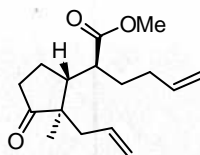

31

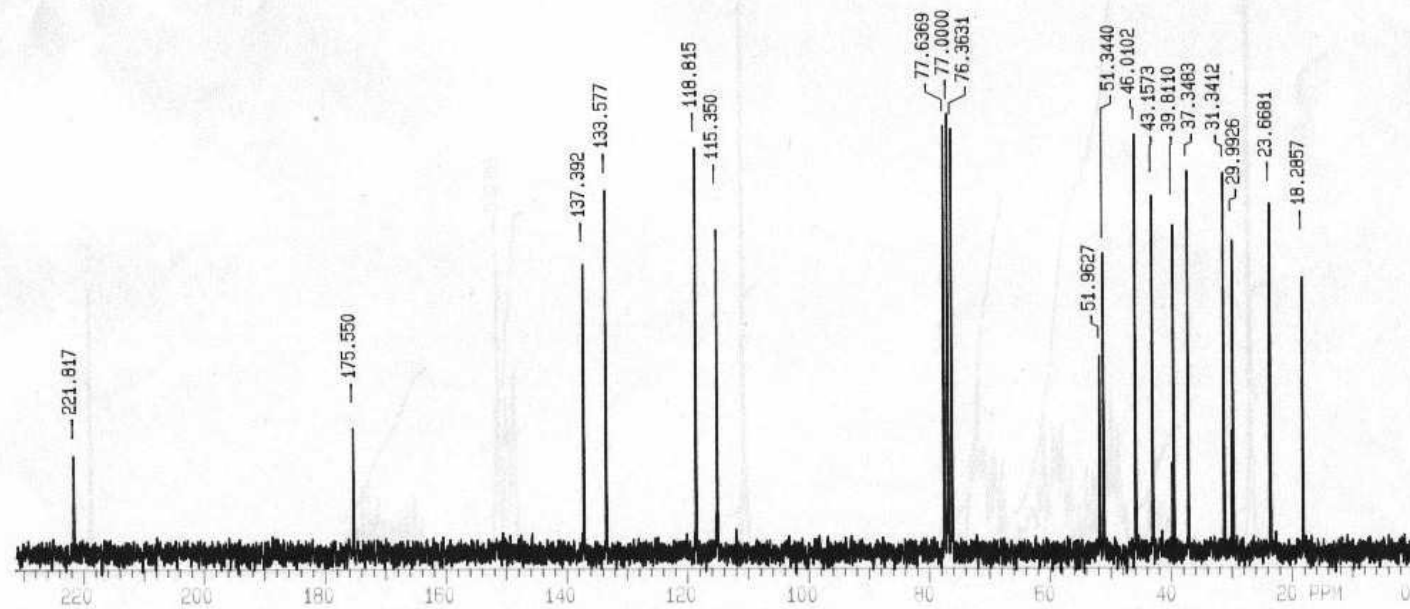

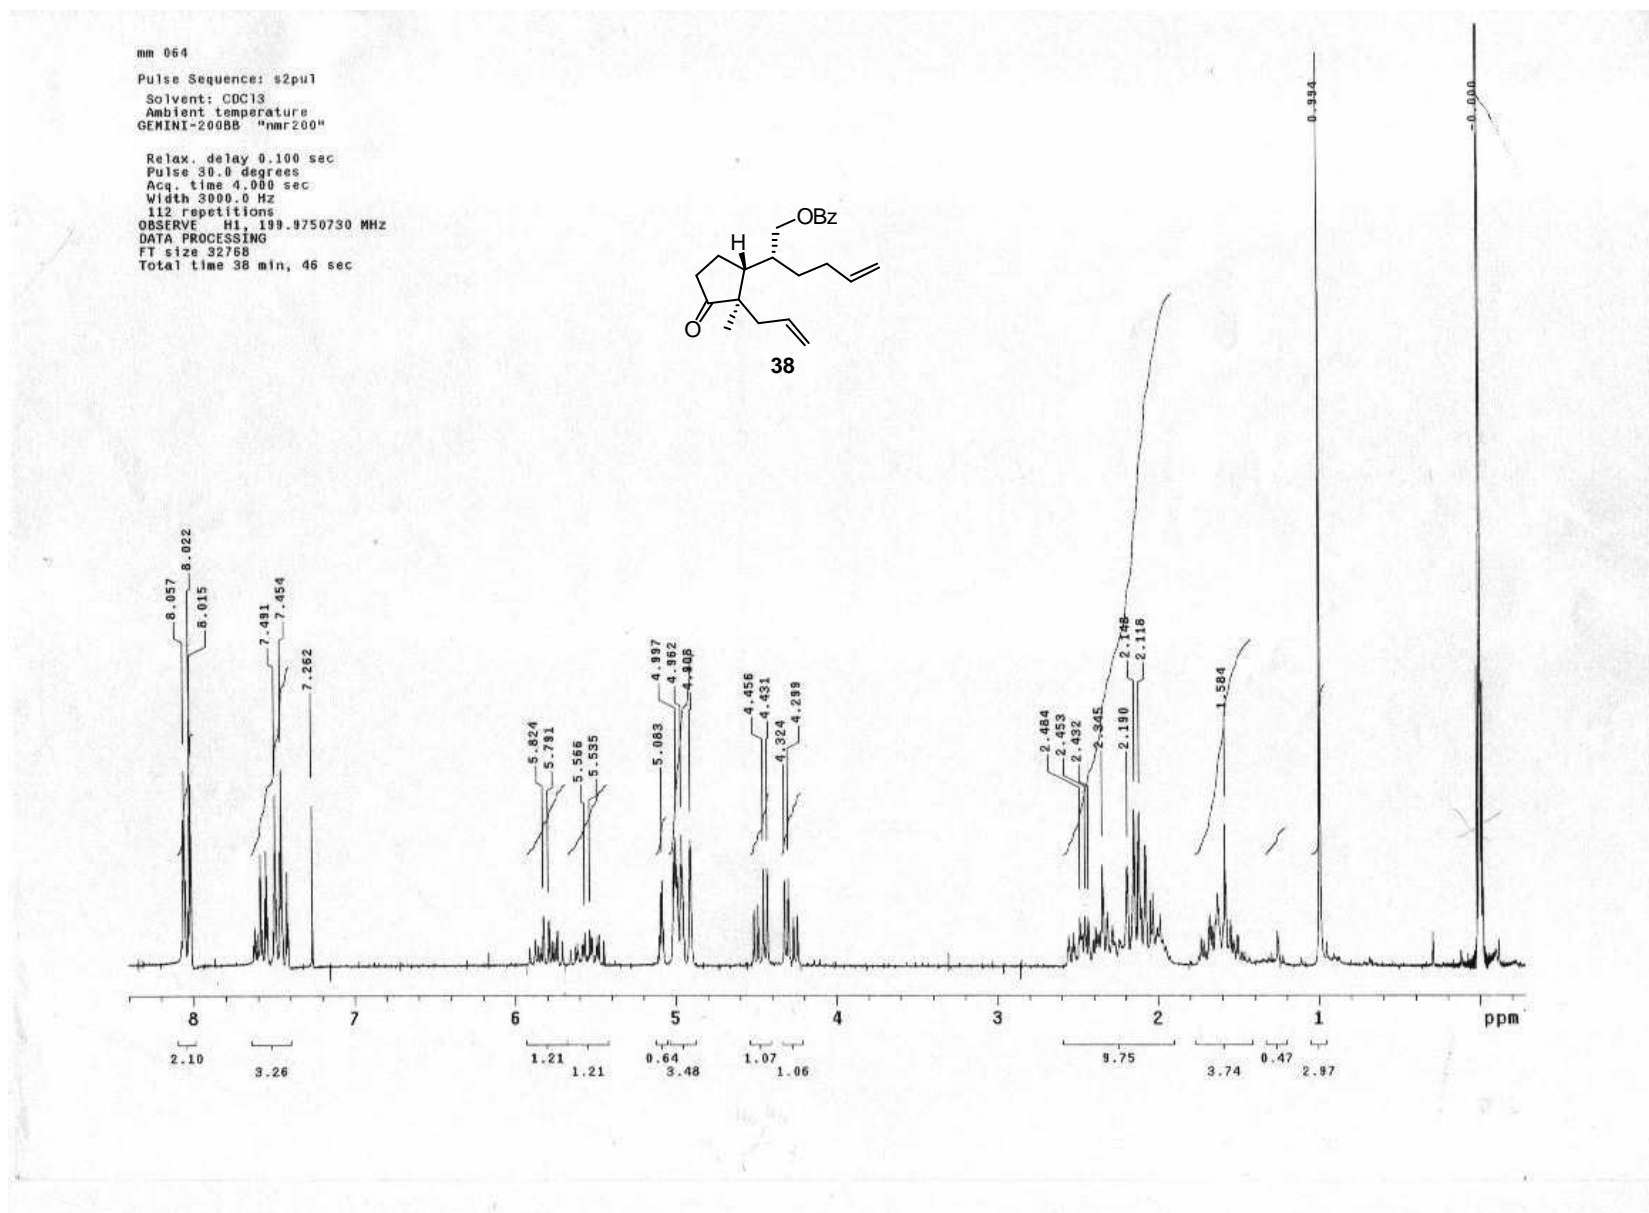

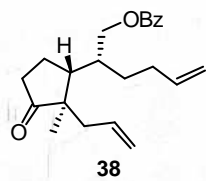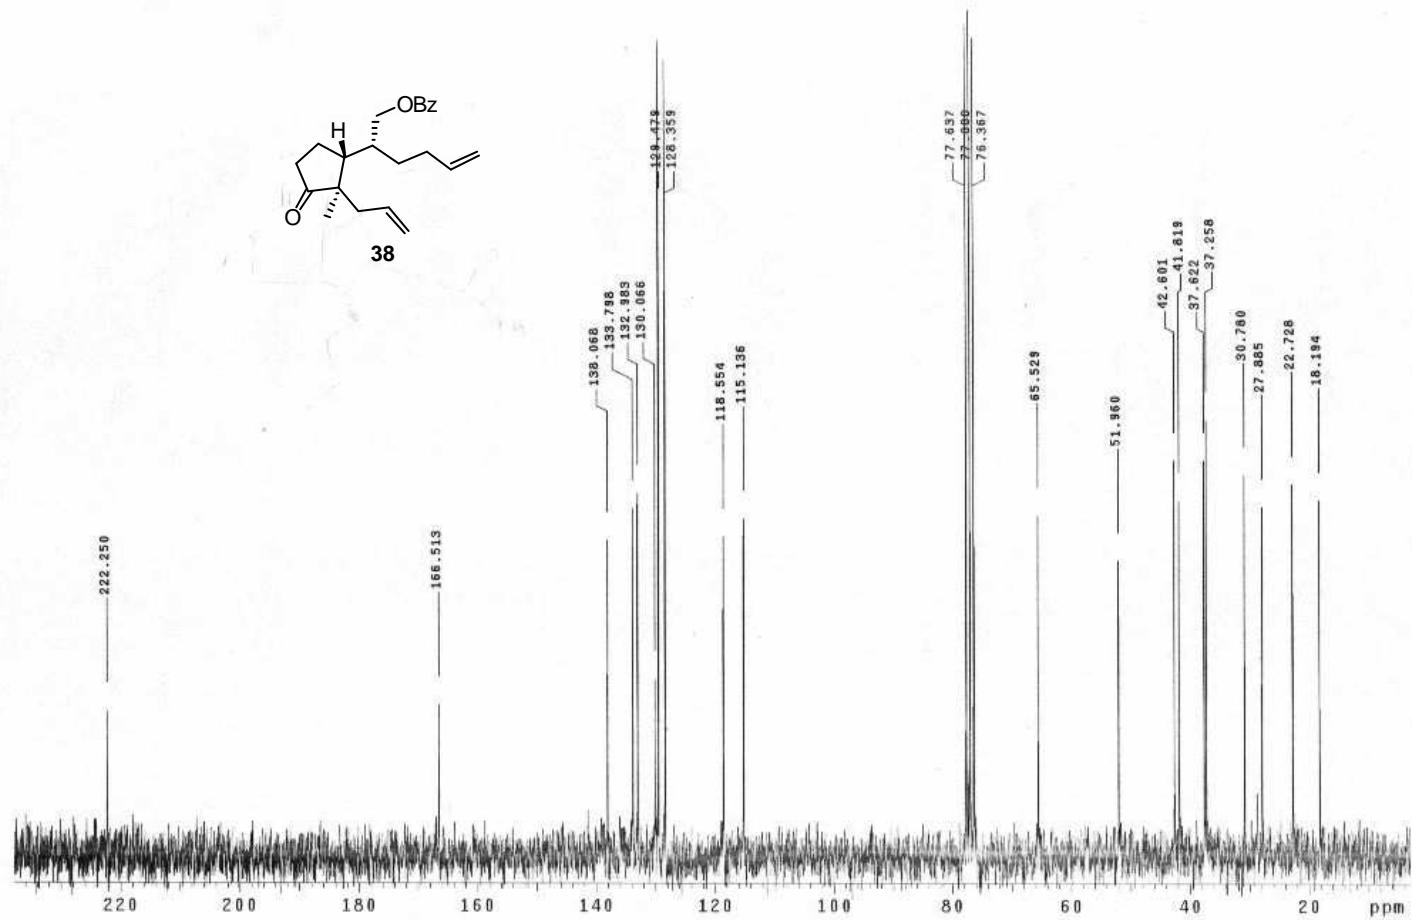

tioester+D2O  
Pulse Sequence: s2pul  
Solvent: CDCl3  
Ambient temperature  
GEMINI-200BB "nmr200"  
  
Relax. delay 0.100 sec  
Pulse 30.0 degrees  
Acq. time 3.151 sec  
Width 2600.0 Hz  
44 repetitions  
OBSERVE H1, 199.9750732 MHz  
DATA PROCESSING  
FT size 32768  
Total time 0 min, 0 sec

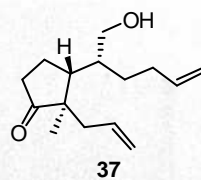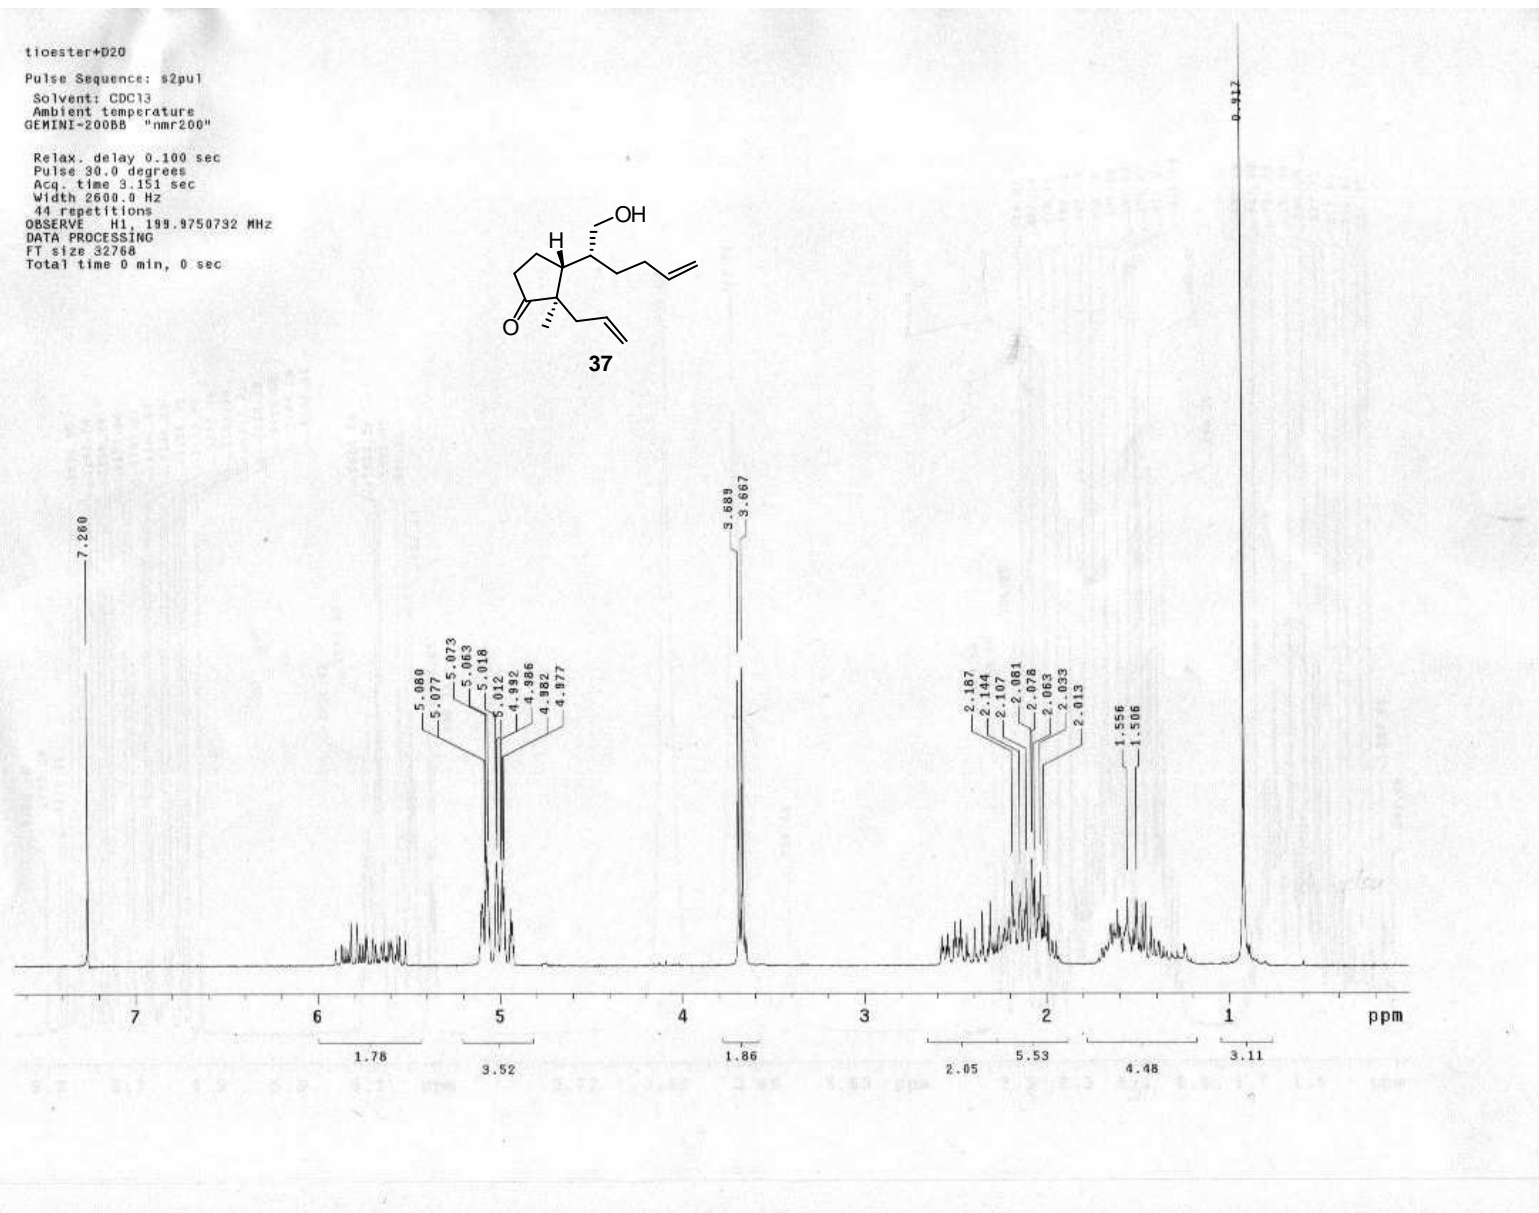

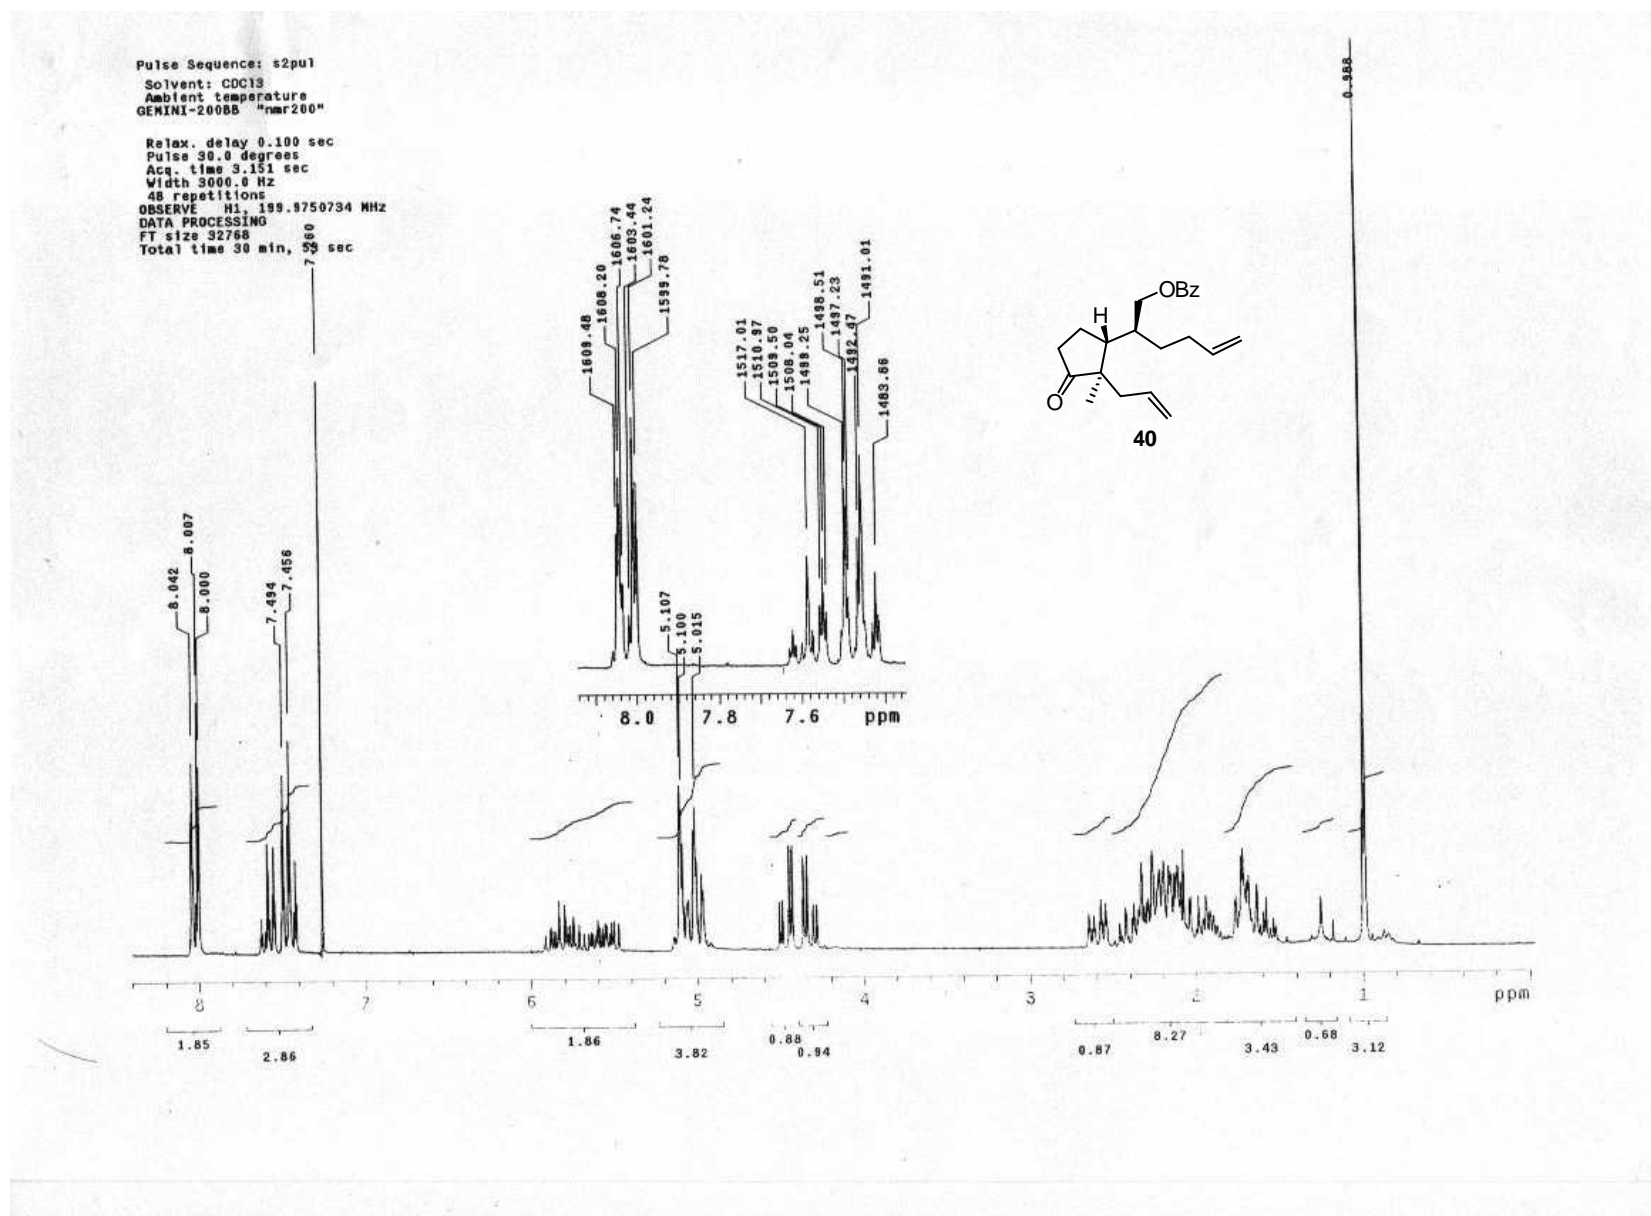



nm090  
ppm090  
Sequence: s2pu1  
exp2 std13c

| SAMPLE      |            | DEC. & VT  |         |
|-------------|------------|------------|---------|
| date        | May 3 2003 | dfrq       | 199.976 |
| solvent     | CDCl3      | dn         | H1      |
| file        | exp        | dpwr       | 38      |
| ACQUISITION |            | 100.0      |         |
| sfrq        | 50.289     | dm         | yyy     |
| tn          | C13        | dmm        | w       |
| at          | 2.000      | dmf        | 9300    |
| np          | 56000      | PROCESSING |         |
| sw          | 14500.0    | lb         | 1.00    |
| fb          | 8000       | wtfile     |         |
| bs          | 32         | proc       | ft      |
| tpwr        | 46         | fn         | 131072  |
| pw          | 8.0        |            |         |
| d1          | 2.000      | werr       | react   |
| tof         | 0          | wexp       | wft     |
| nt          | 10000      | wbs        | wft     |
| ct          | 512        | wnt        |         |
| alock       | n          |            |         |
| gain        | 29         |            |         |
| FLAGS       |            |            |         |
| ll          | n          |            |         |
| ln          | n          |            |         |
| dp          | y          |            |         |
| DISPLAY     |            |            |         |
| sp          | -18.7      |            |         |
| wp          | 12076.6    |            |         |
| vs          | 12988      |            |         |
| sc          | 0          |            |         |
| wc          | 250        |            |         |
| hzm         | 48.31      |            |         |
| is          | 500.00     |            |         |
| rfl         | 6246.9     |            |         |
| rff         | 3871.8     |            |         |
| th          | 9          |            |         |
| ins         | 100.000    |            |         |
| ai          | no         | ph         |         |

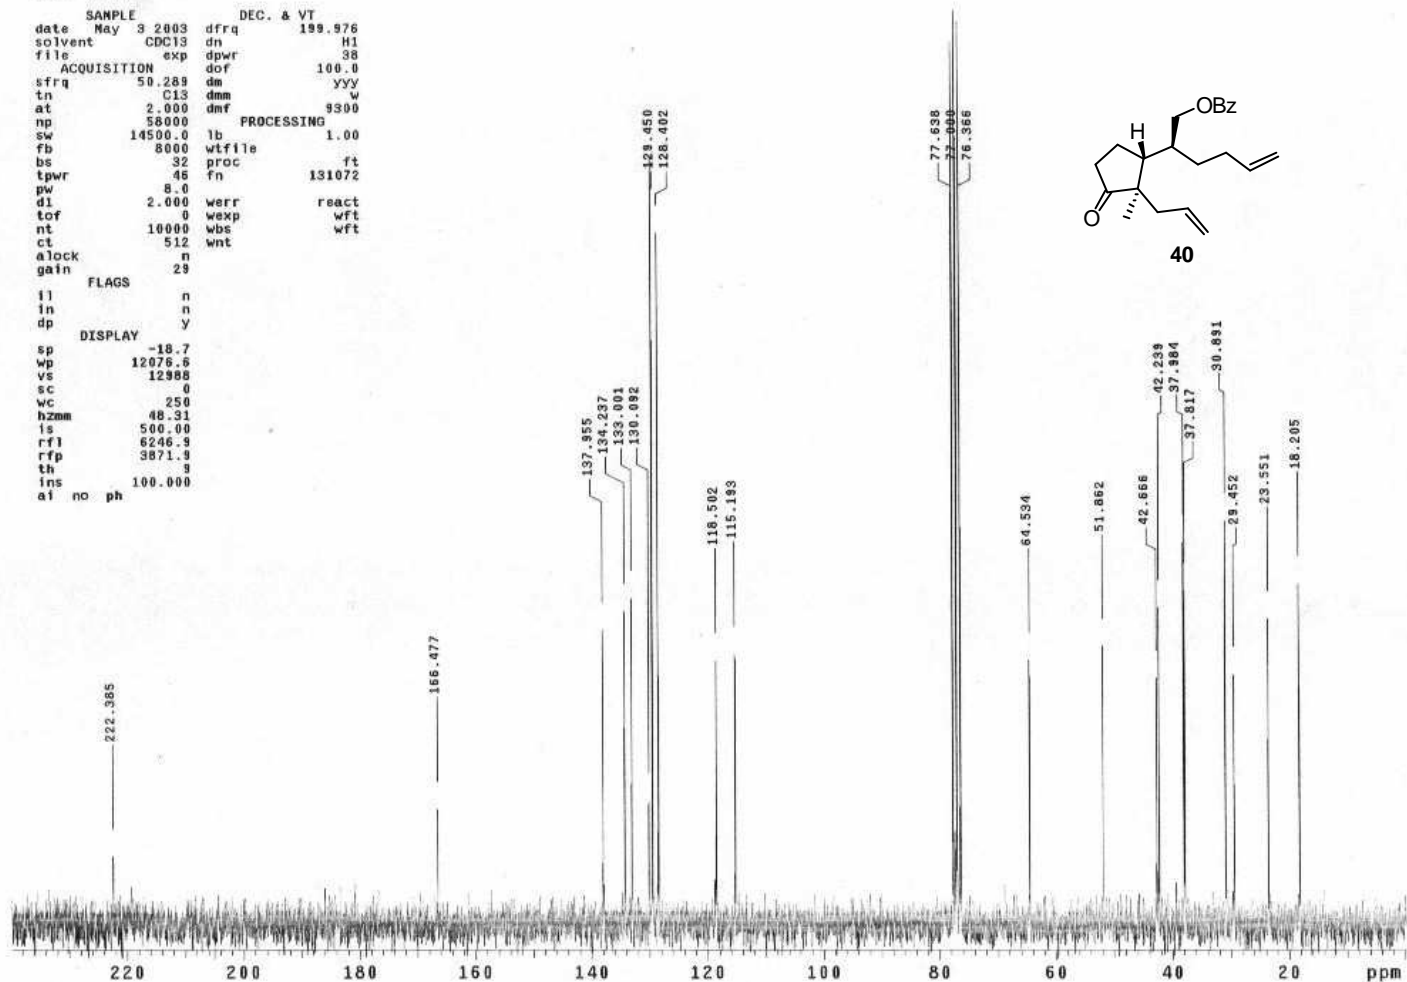

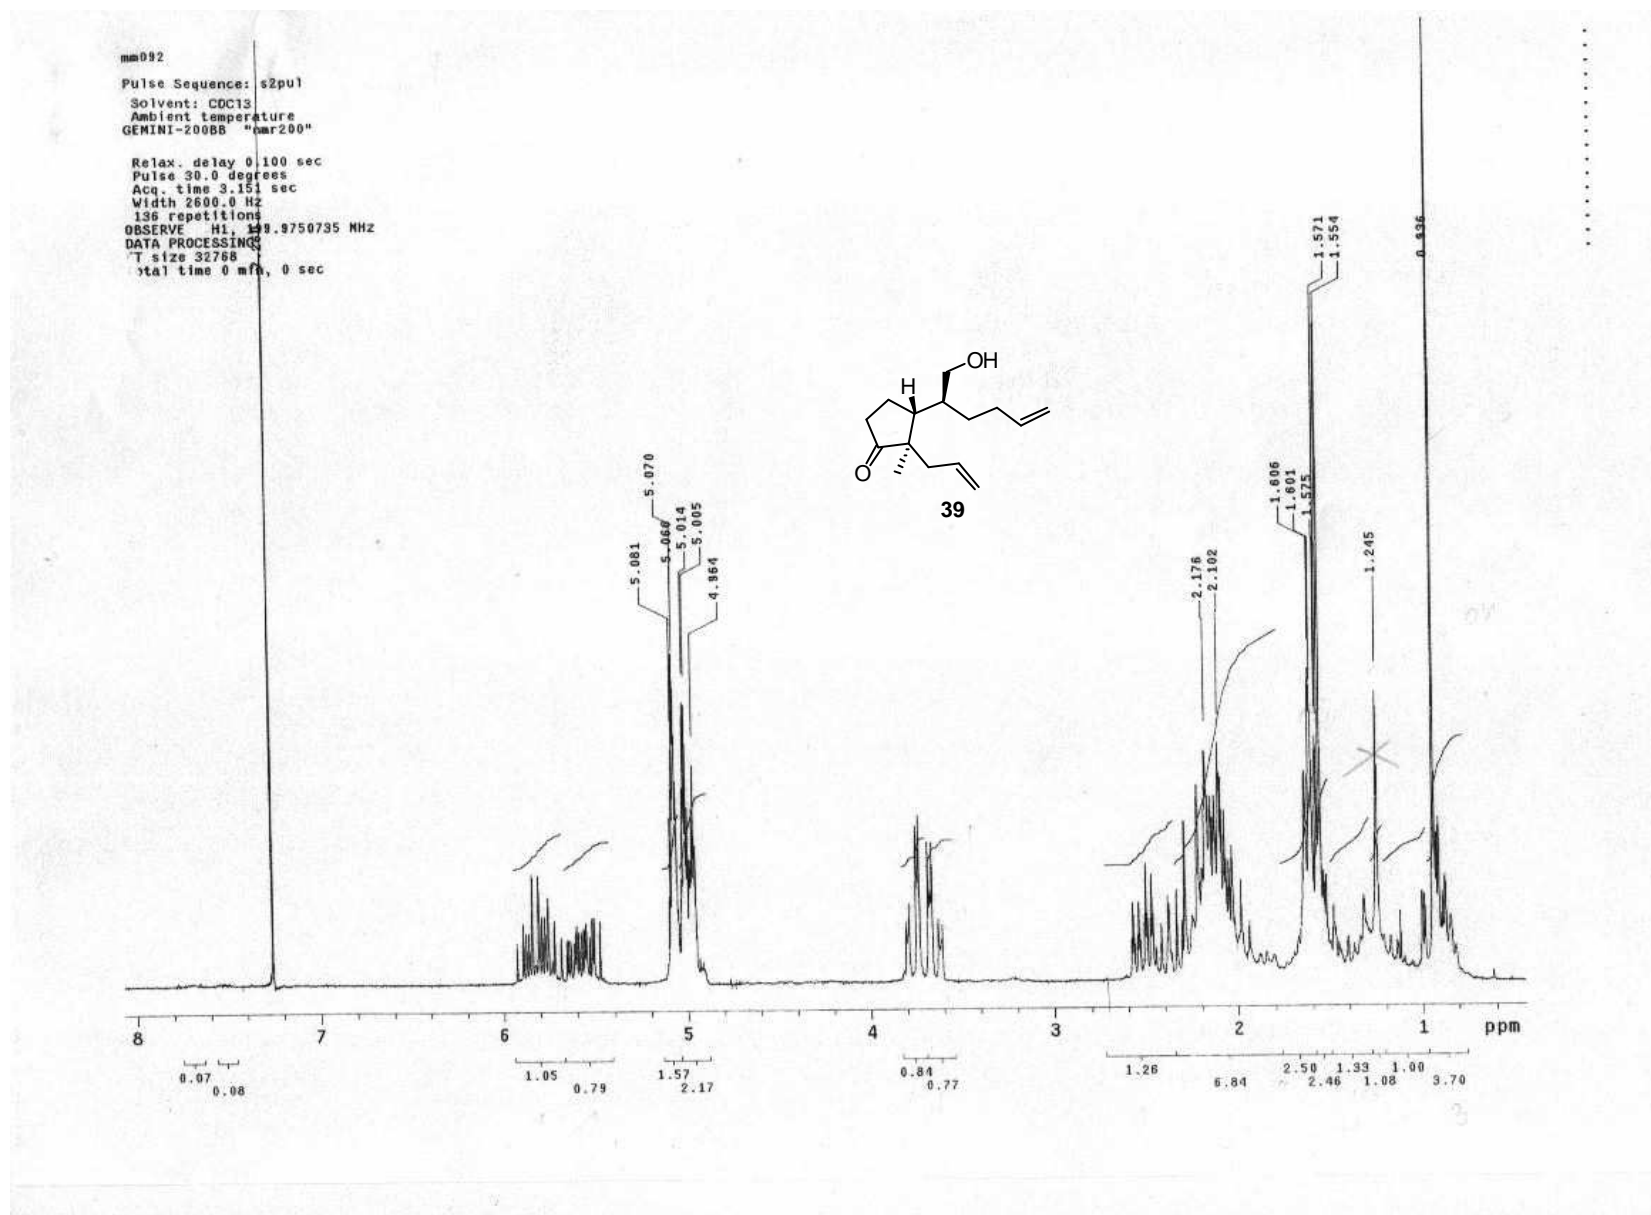

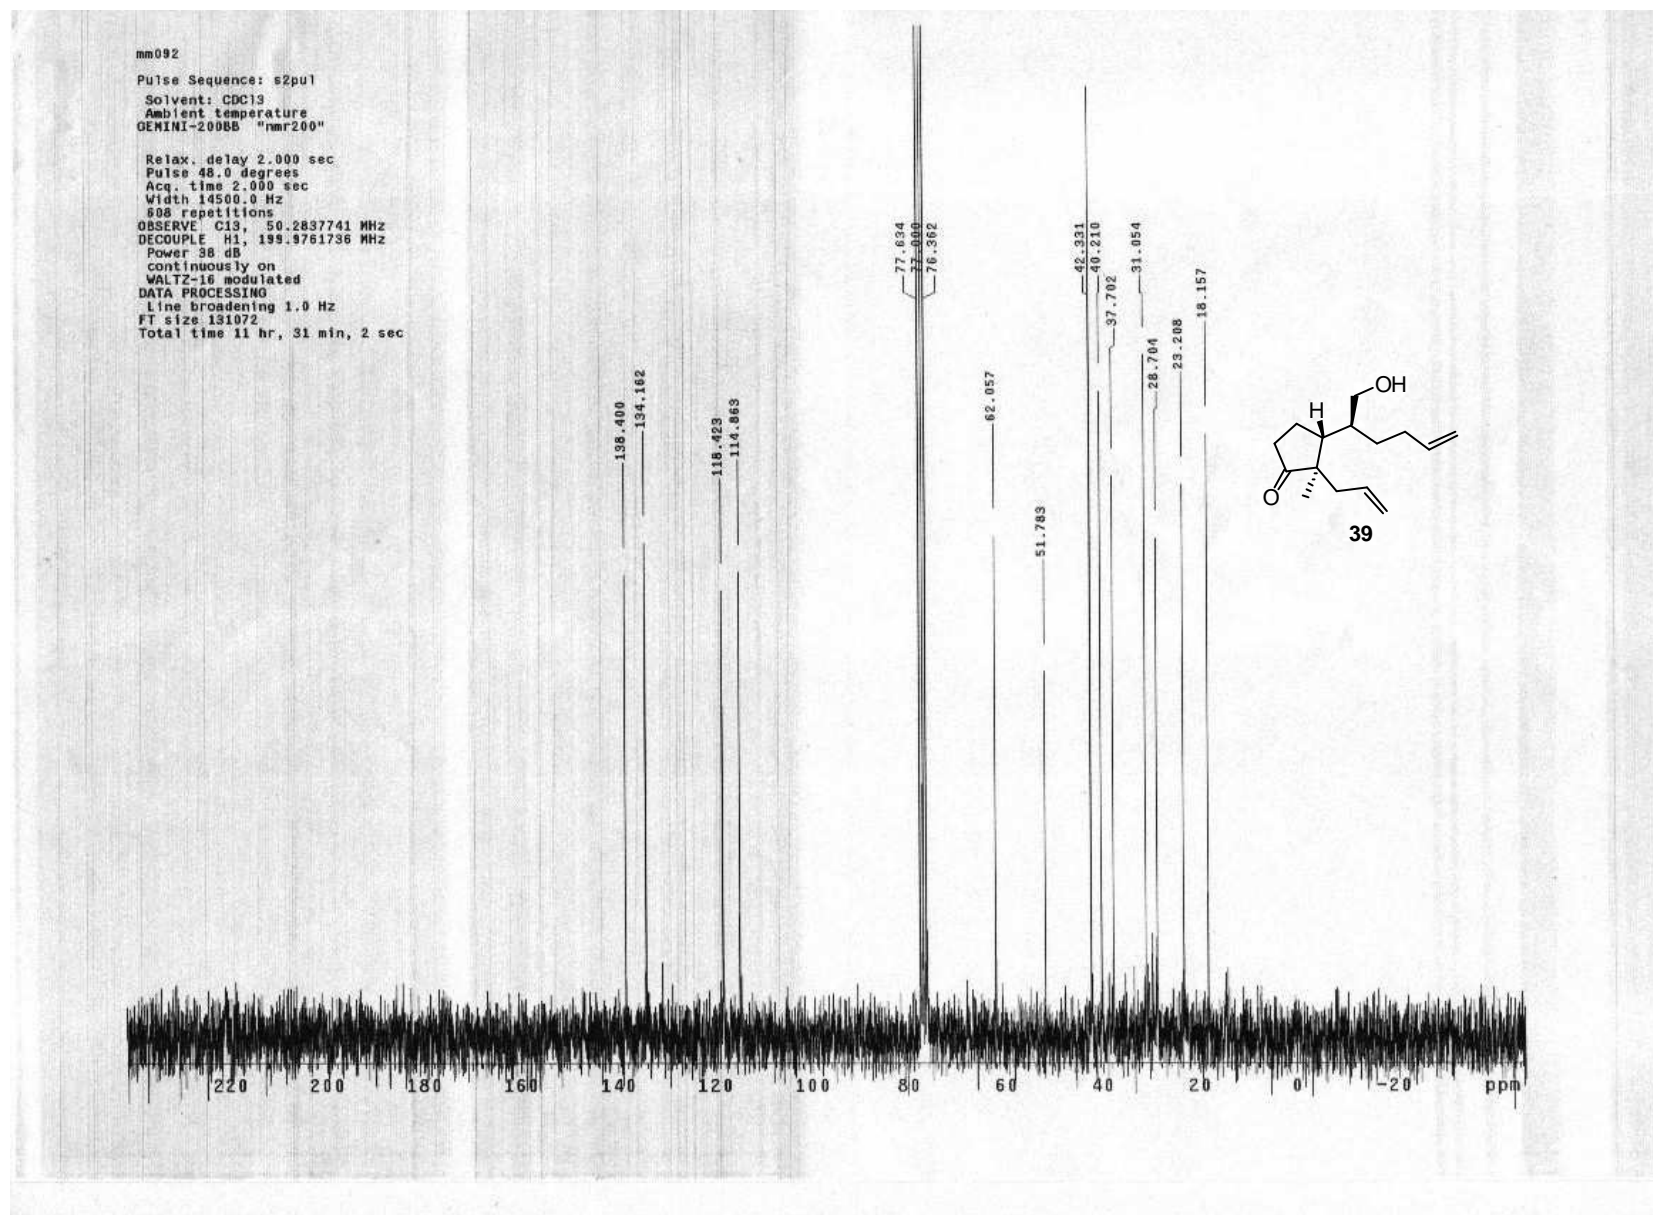



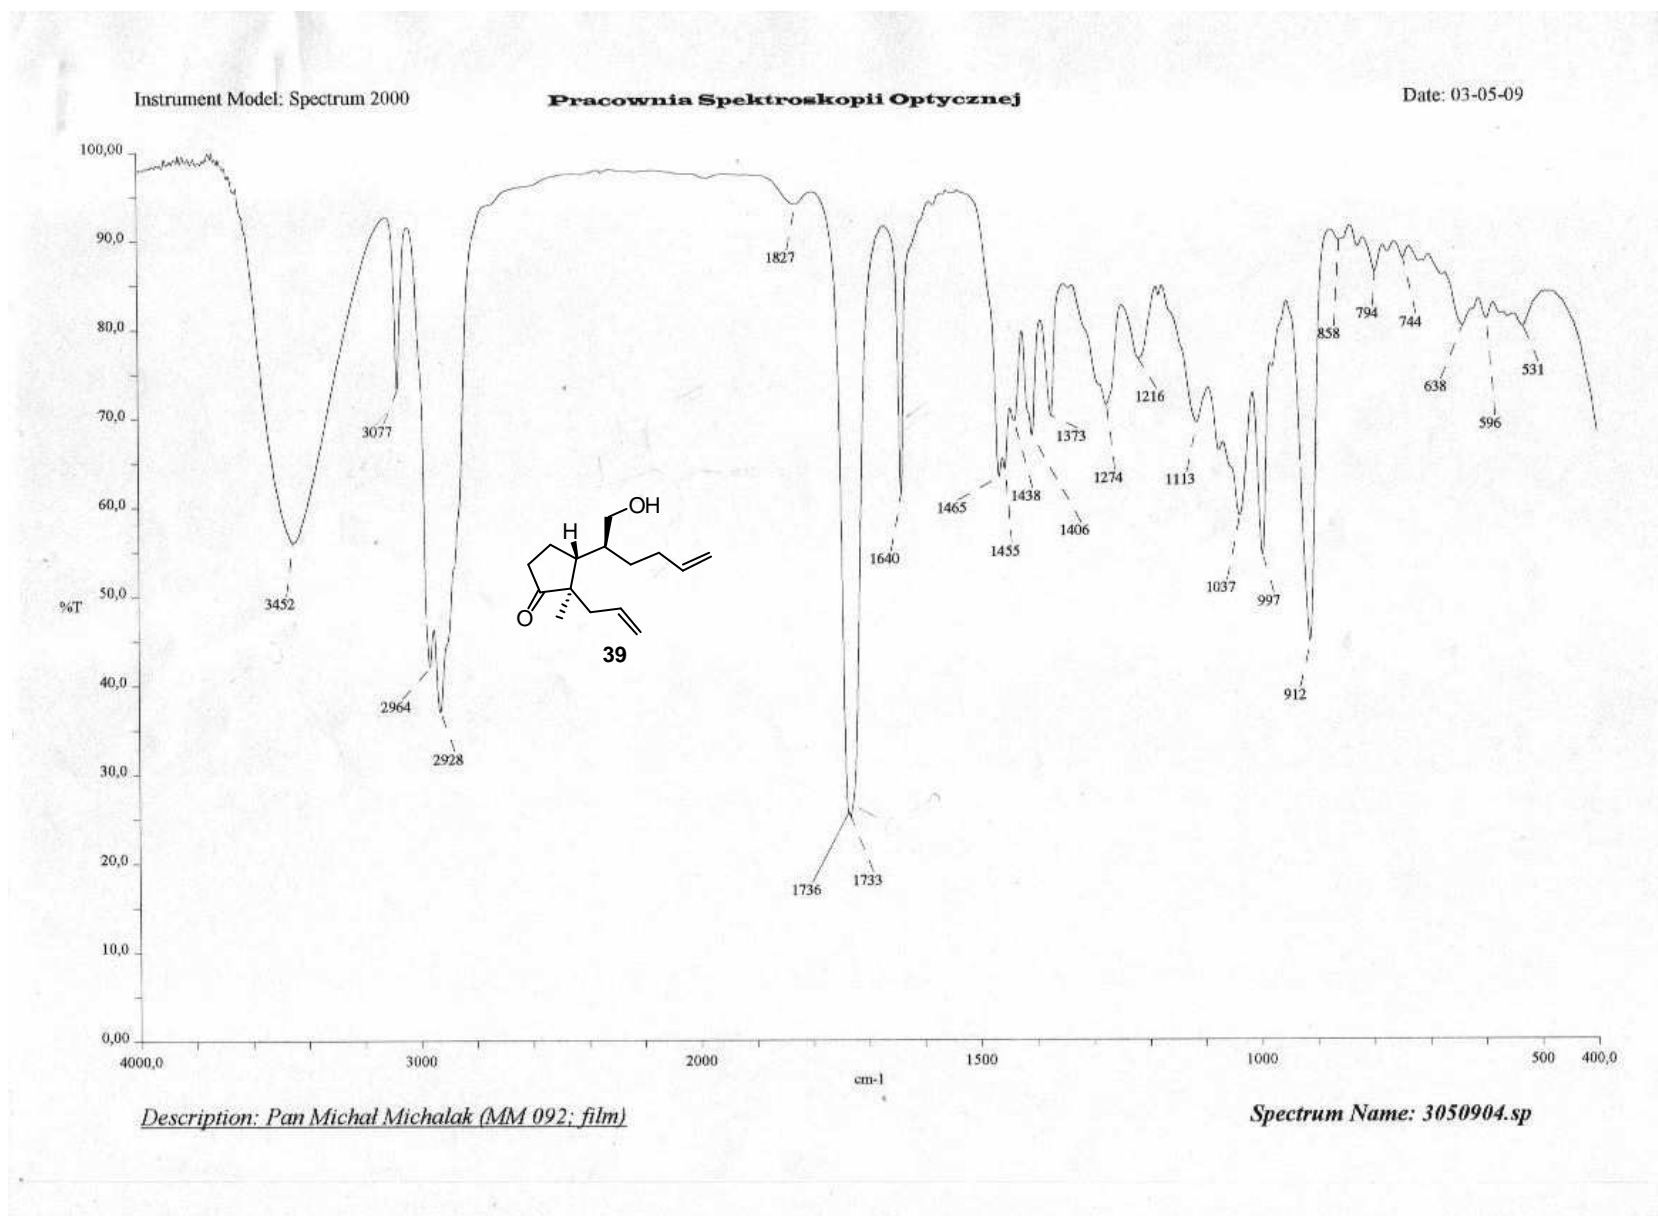

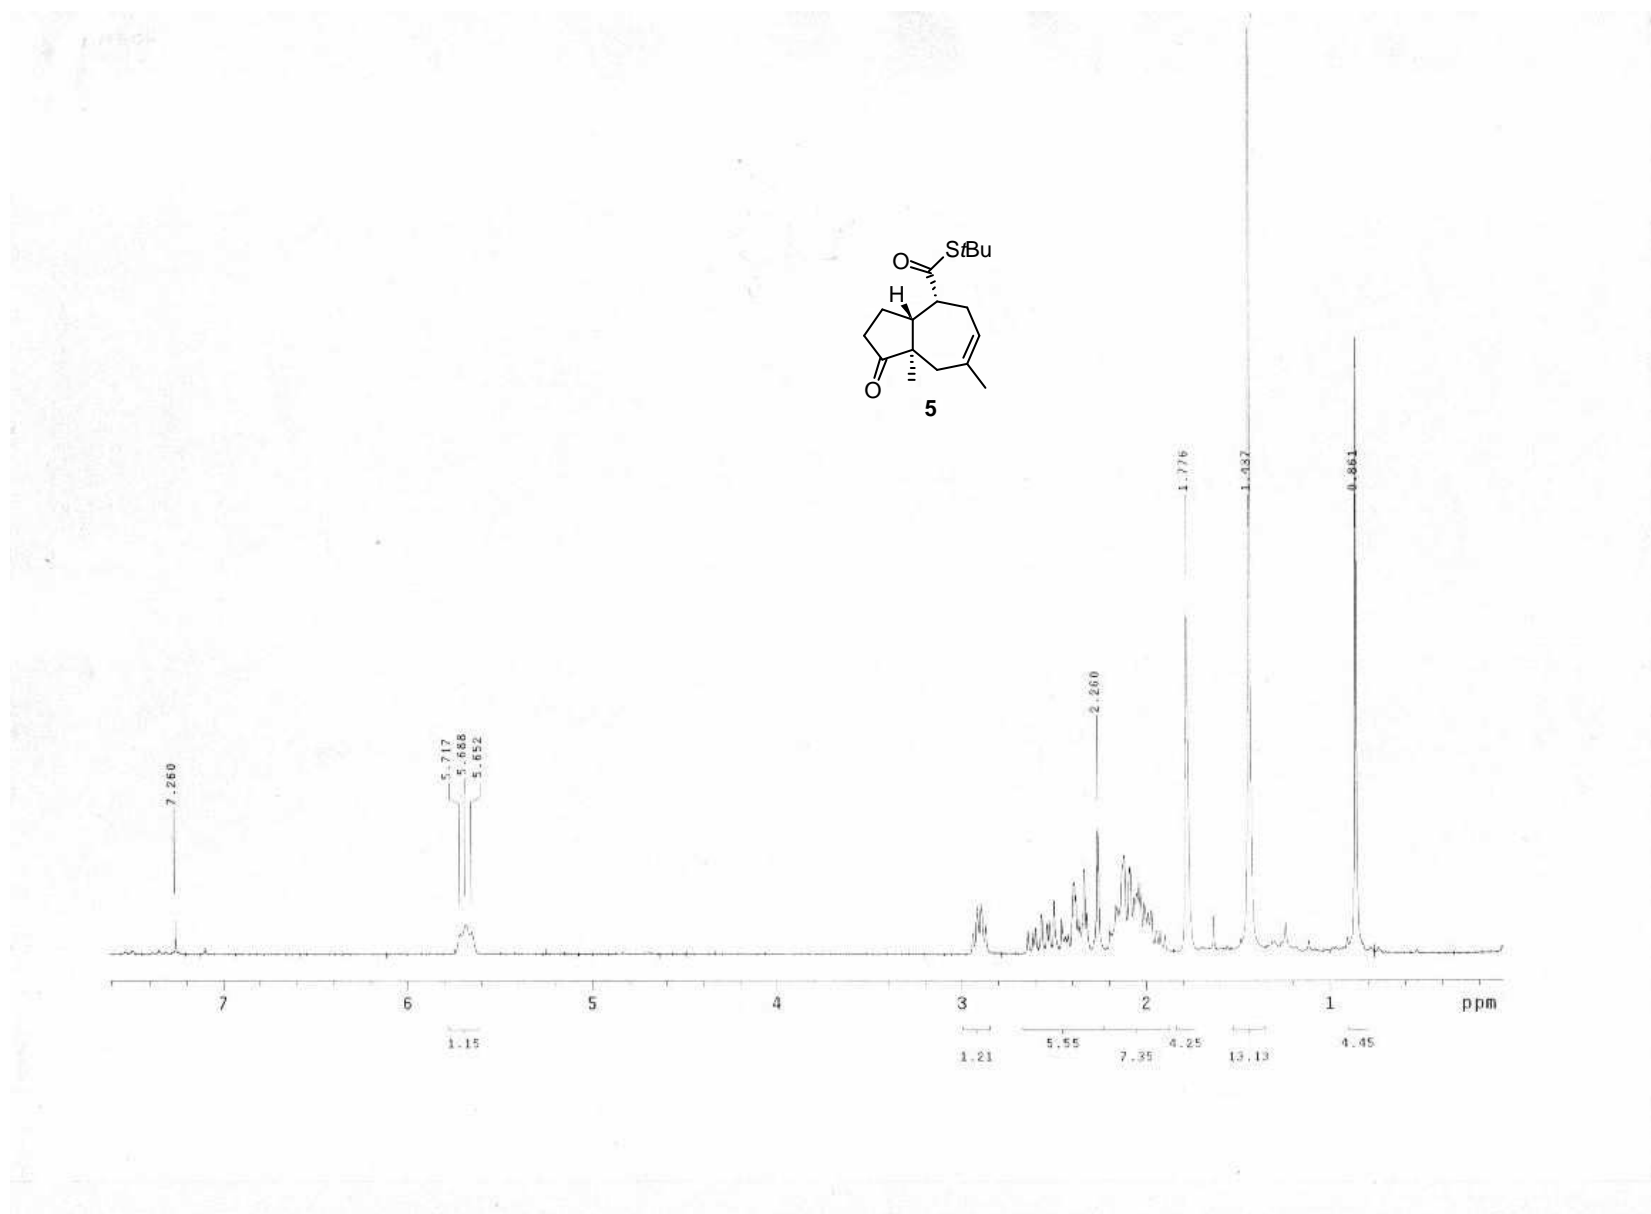

mm370wyzs2yrf-c M1406  
Pulse Sequence: s2pul  
Solvent: CDCl3  
Ambient temperature  
GEMINI-200EB "nmr200"  
  
Relax. delay 2.000 sec  
Pulse 45.0 degrees  
Acq. time 1.499 sec  
Width 16000.0 Hz  
160 repetitions  
OBSERVE C13, 50.2827735 MHz  
DECOUPLE H1, 199.9717975 MHz  
Power 38 dB  
Continuously On  
WALTZ-16 modulated  
DATA PROCESSING  
Line broadening 1.0 Hz  
FT size 65536

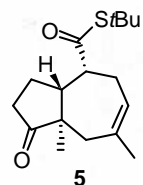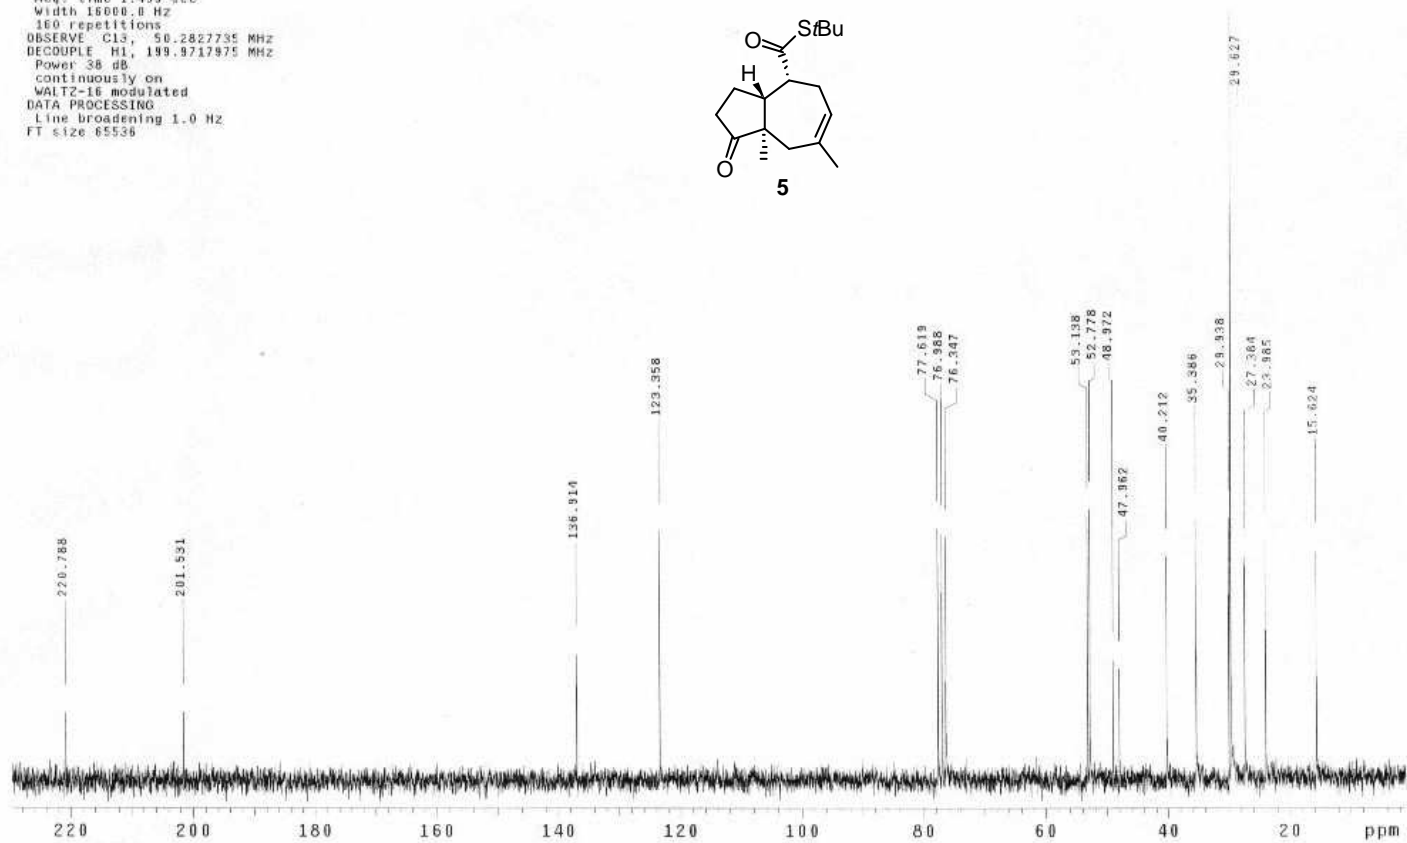

mm335hwyzsyrf

Pulse Sequence: s2pu1

Solvent: CDC13

Ambient temperature

GEMINI-200BB "nmr200"

Relax. delay 0.100 sec

Pulse 56.2 degrees

Acq. time 4.000 sec

Width 2591.2 Hz

20 repetitions

OBSERVE H1, 199.9710974 MHz

DATA PROCESSING

FT size 32768

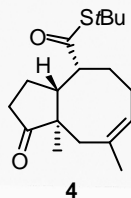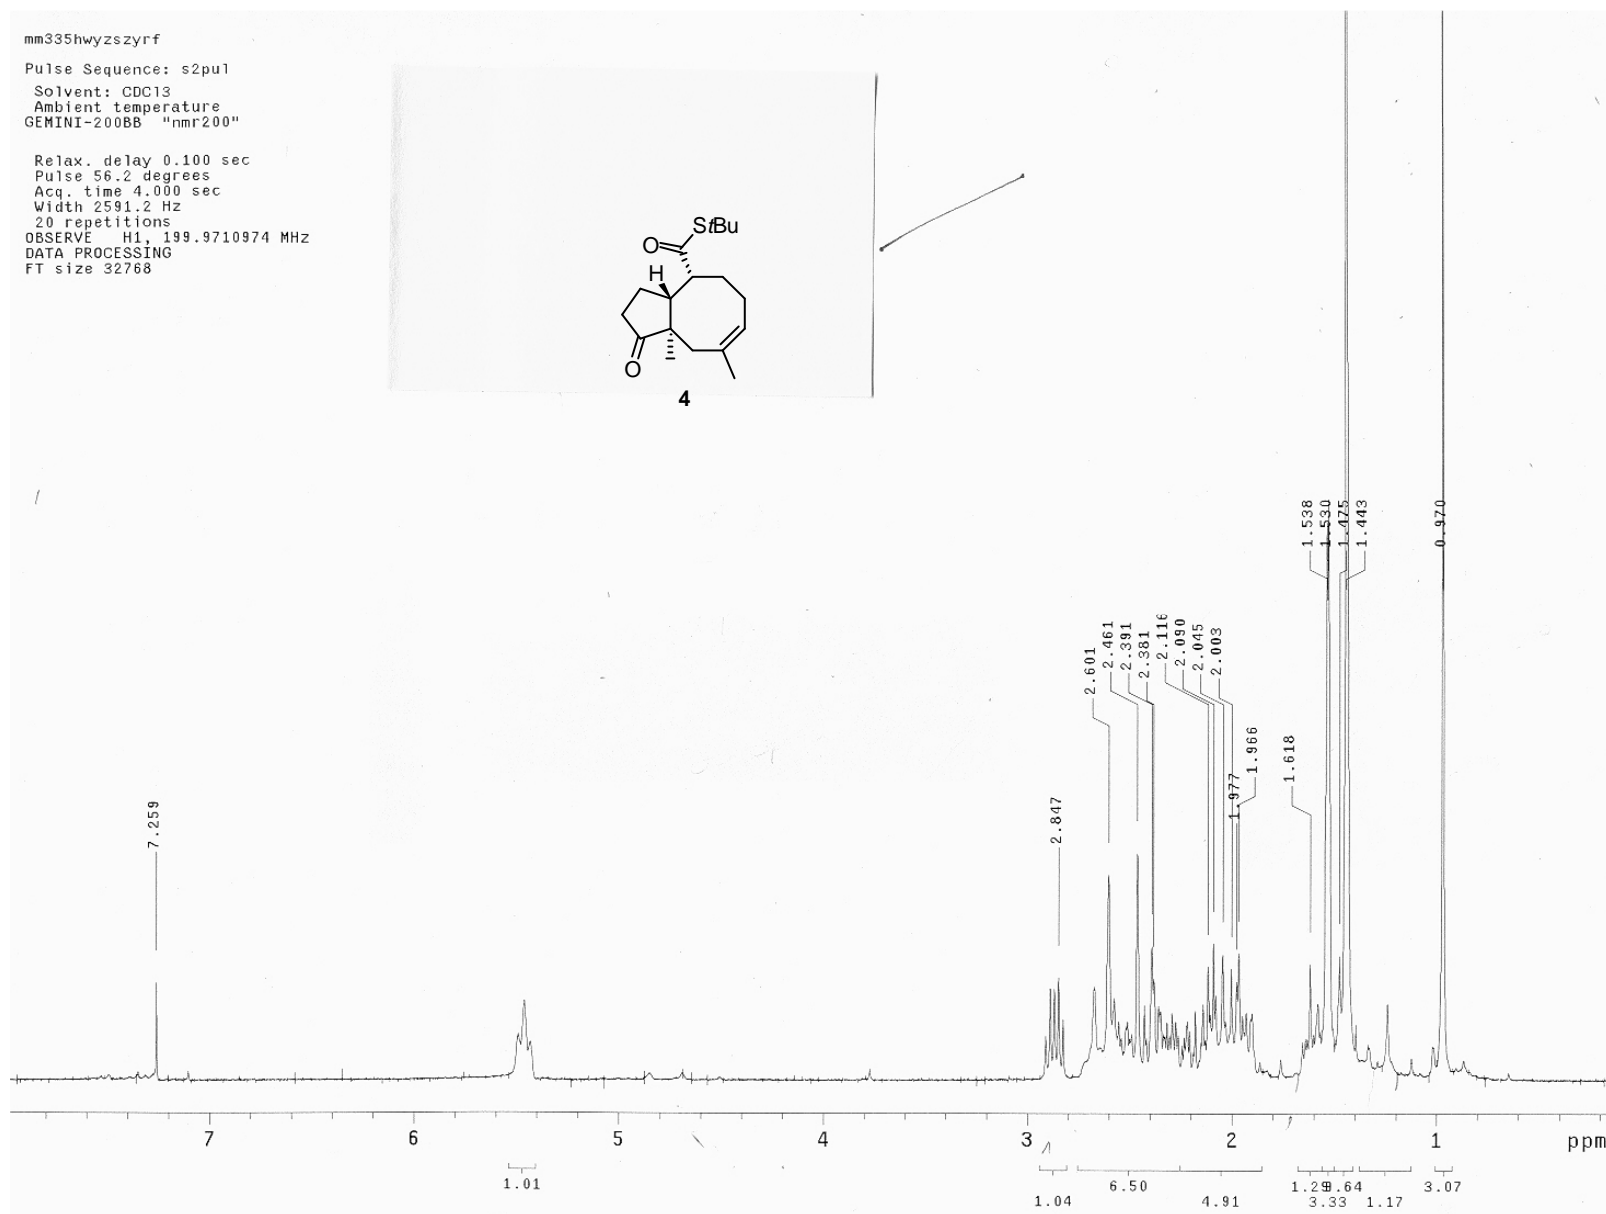

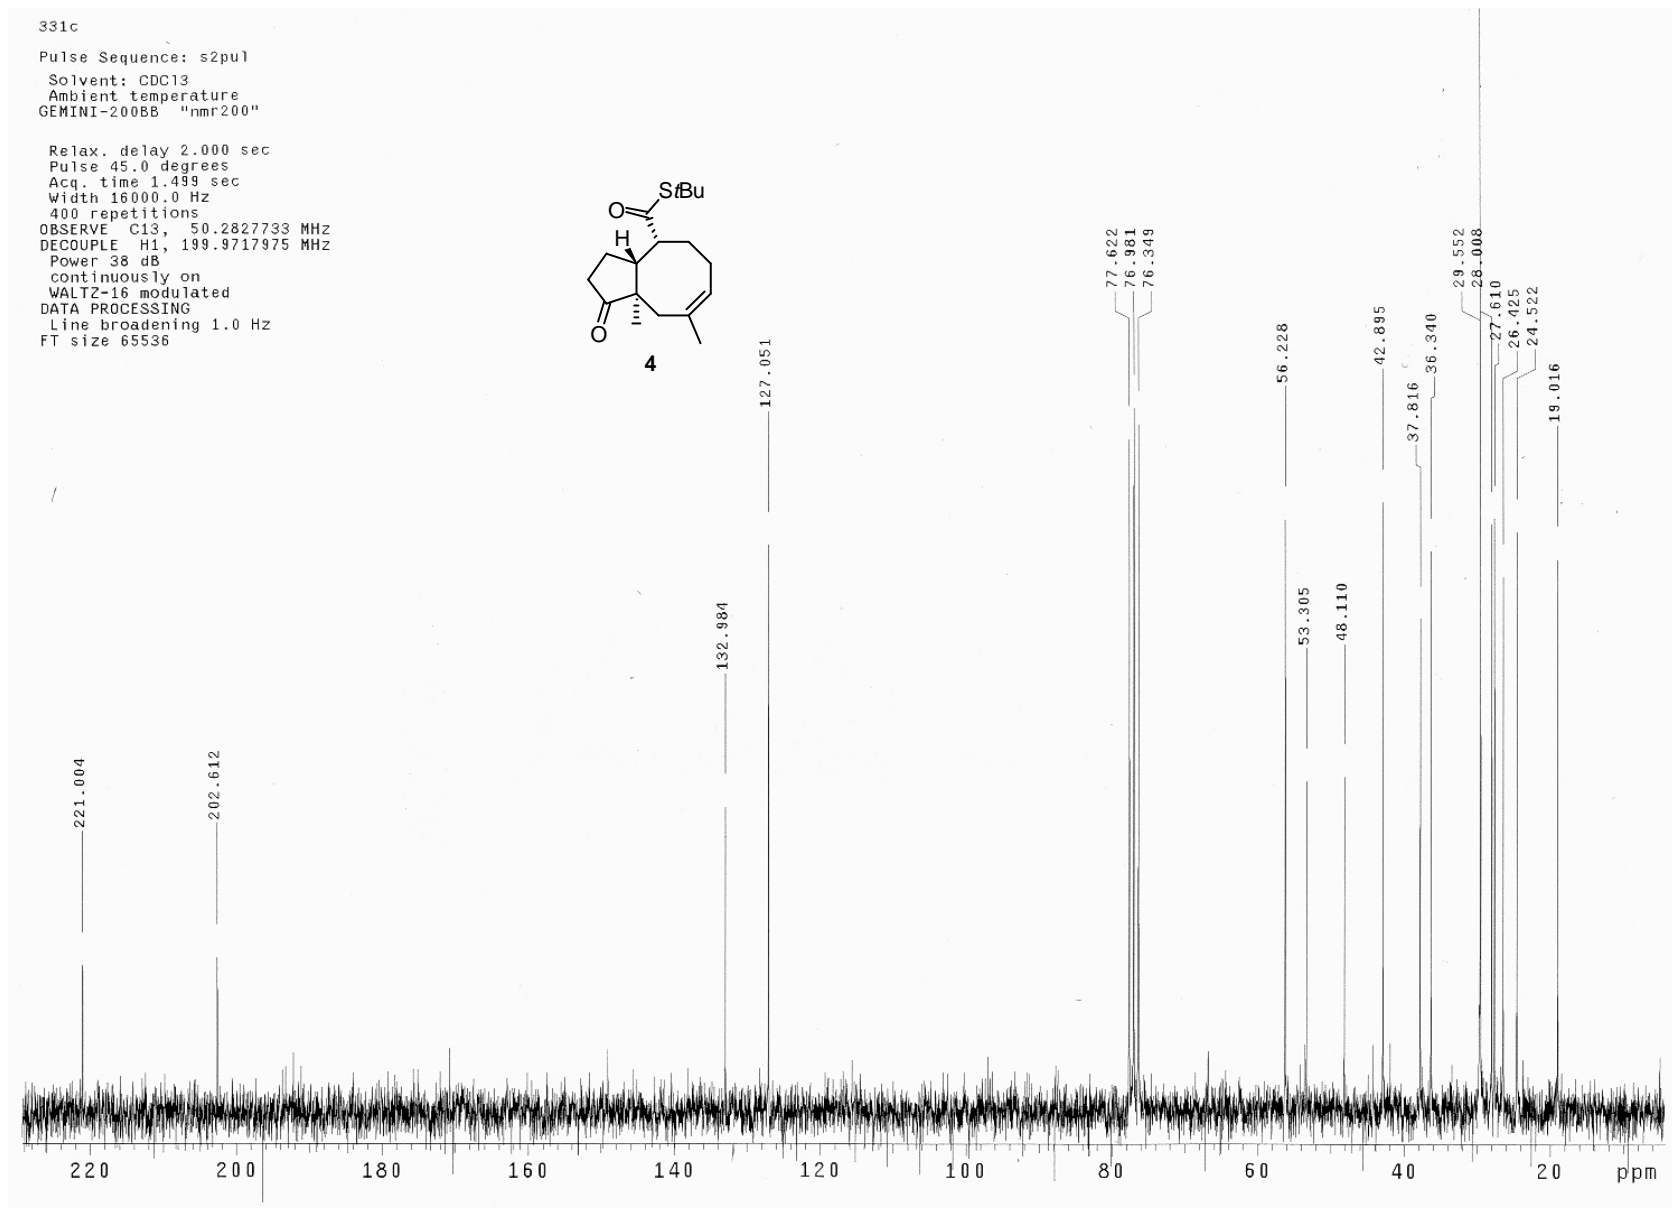

1  
Pulse Sequence: s2pul  
Solvent: CDCl3  
Ambient temperature  
GEMINI-200BB "nmr200"  
  
Relax. delay 0.100 sec  
Pulse 56.2 degrees  
Acq. time 4.000 sec  
Width 2591.2 Hz  
424 repetitions  
OBSERVE H1, 199.9710974 MHz  
DATA PROCESSING  
FT size 32768

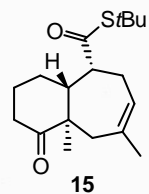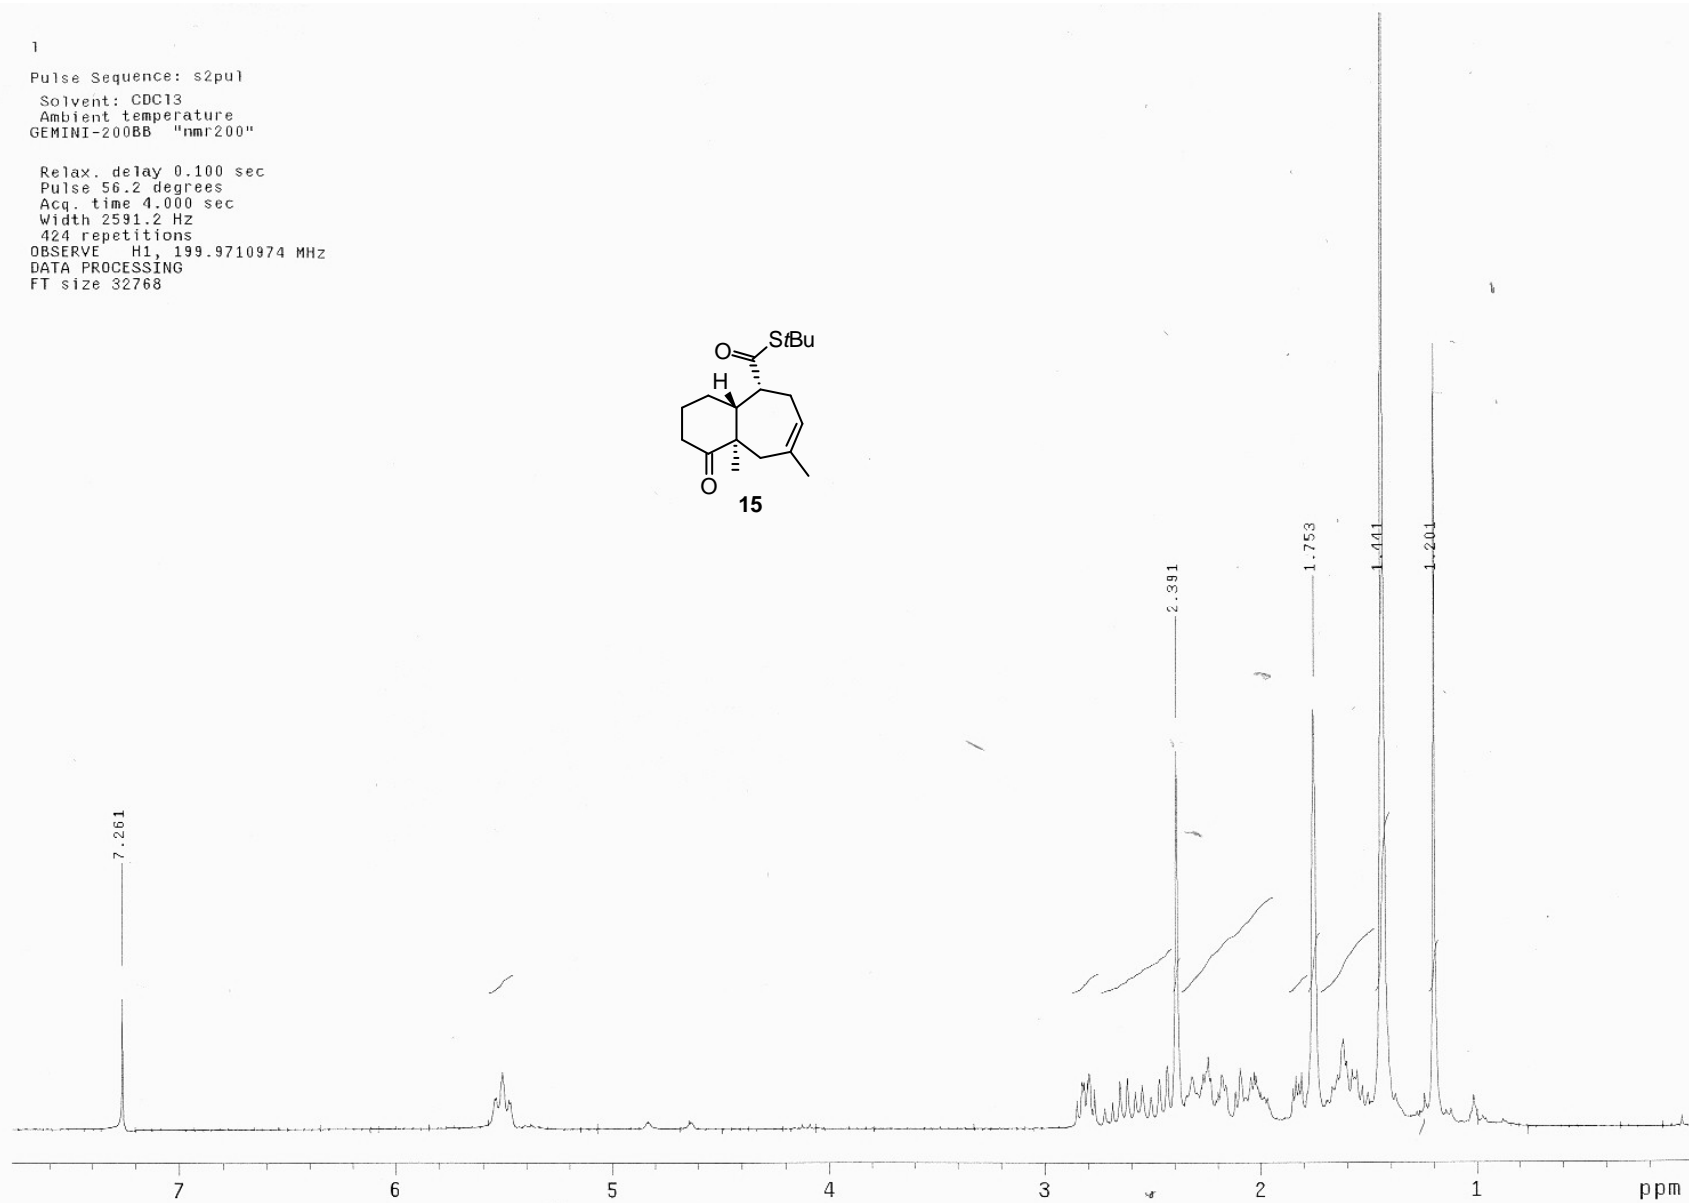

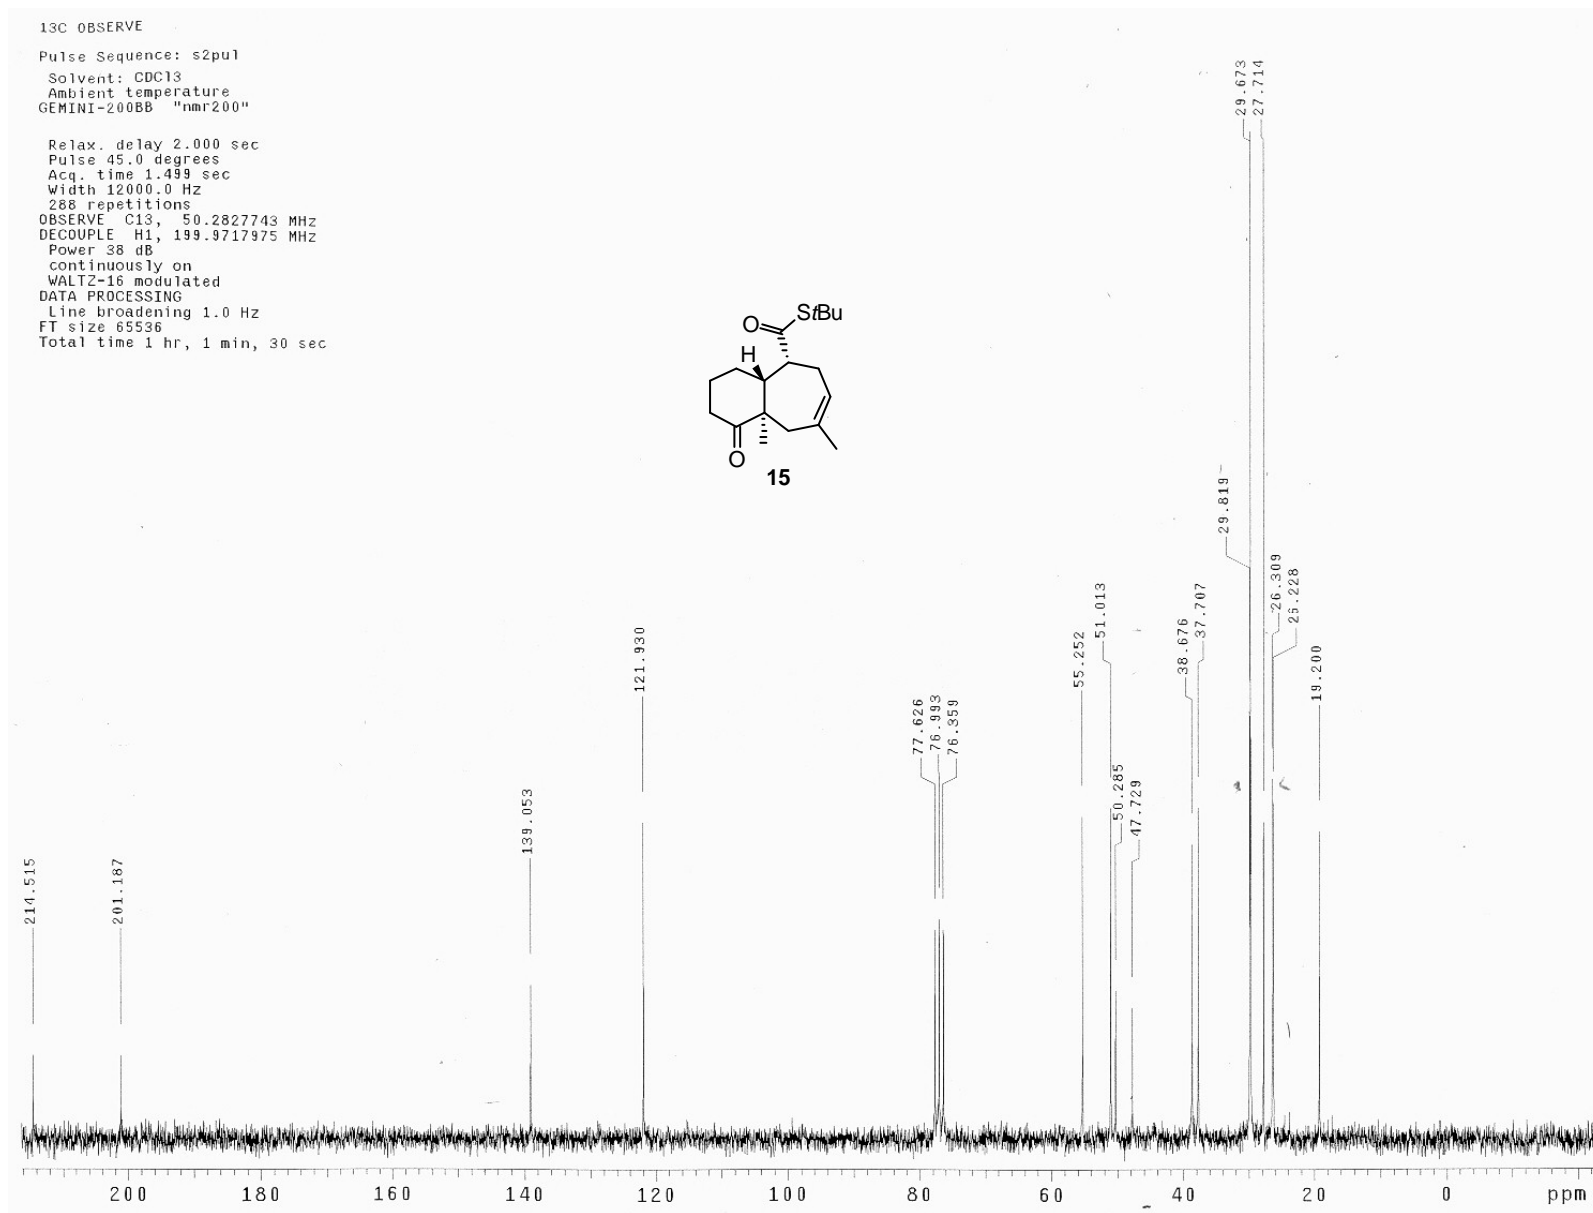

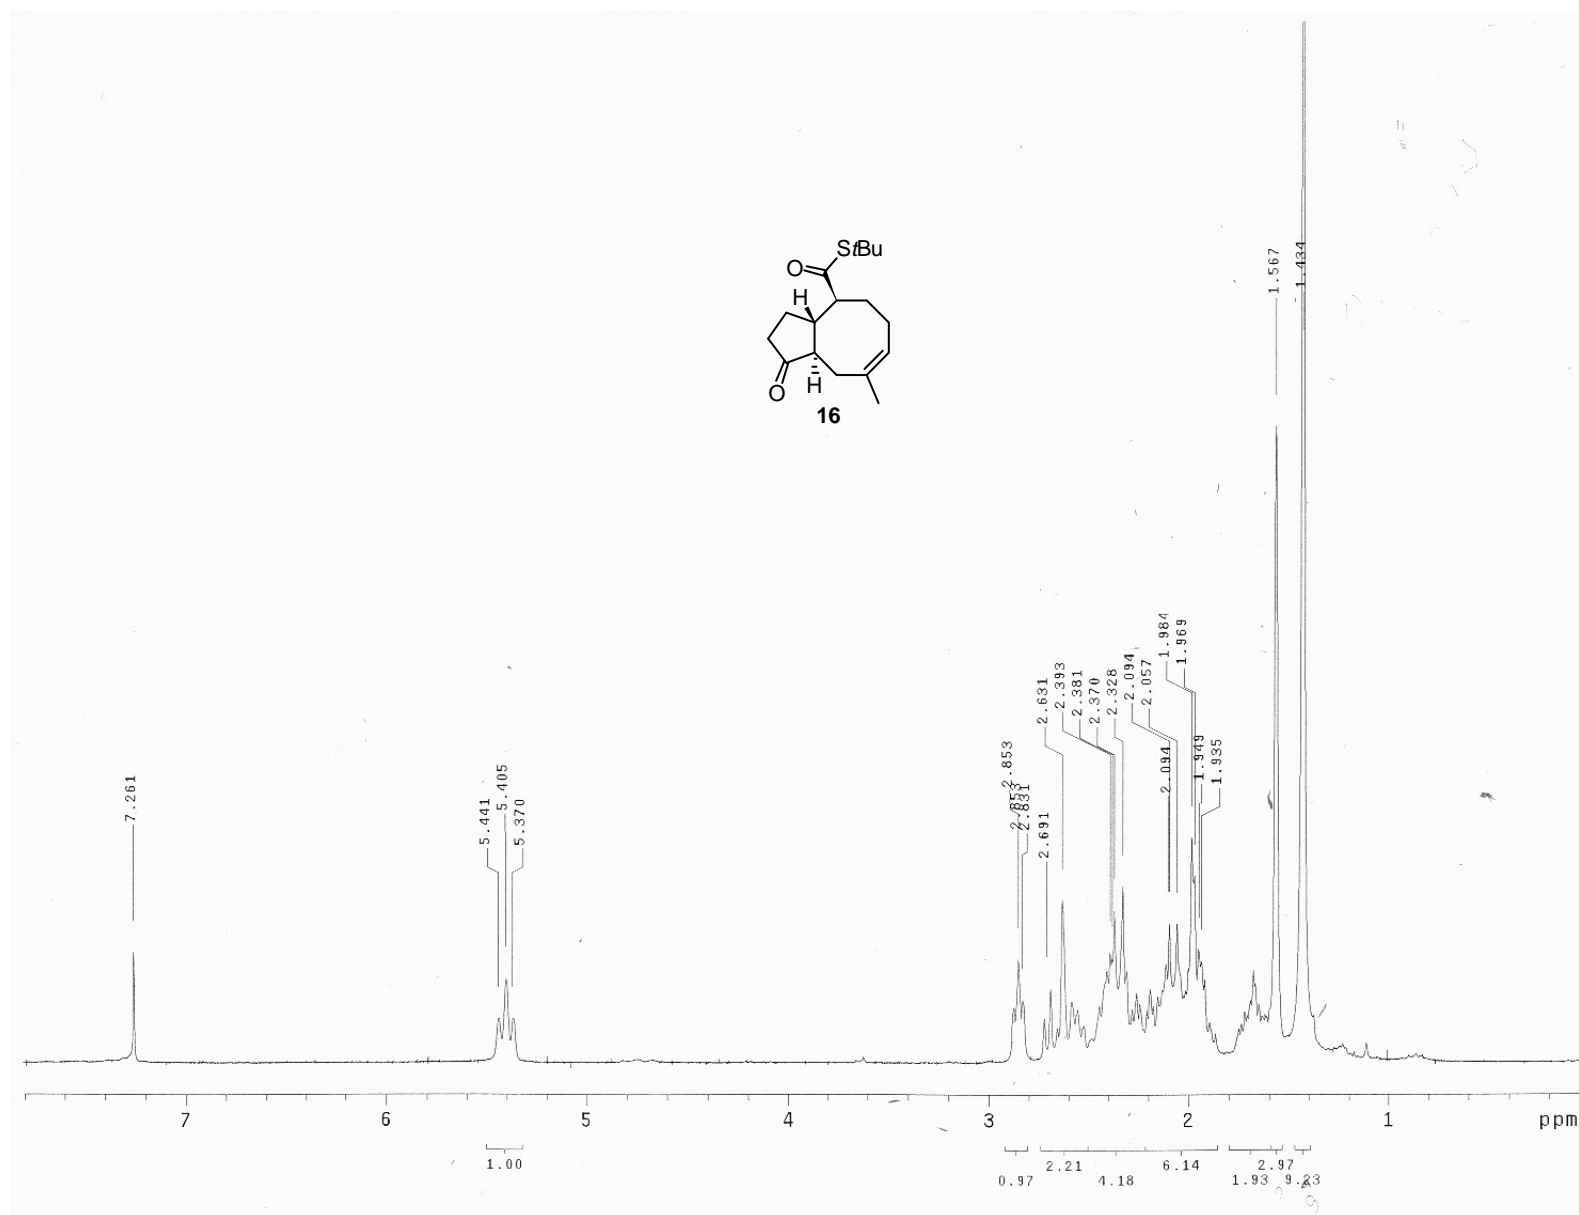



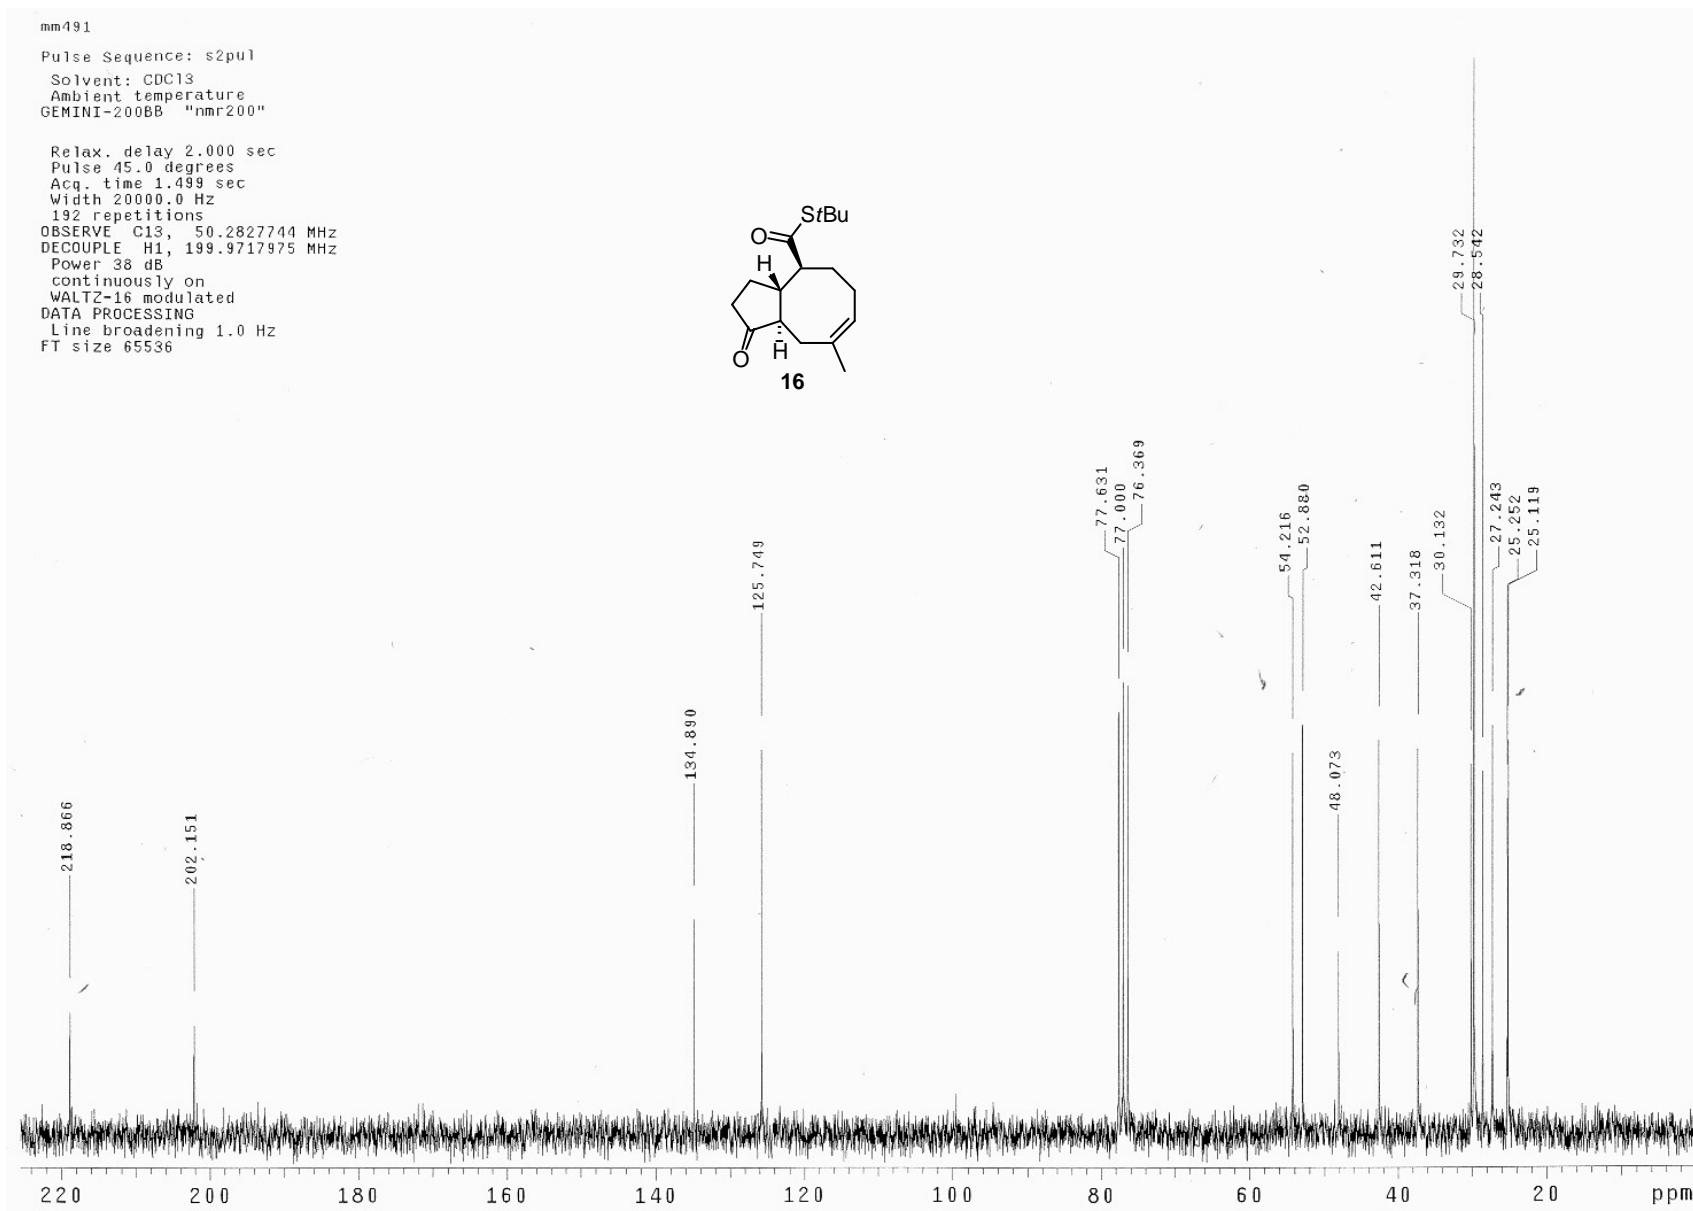

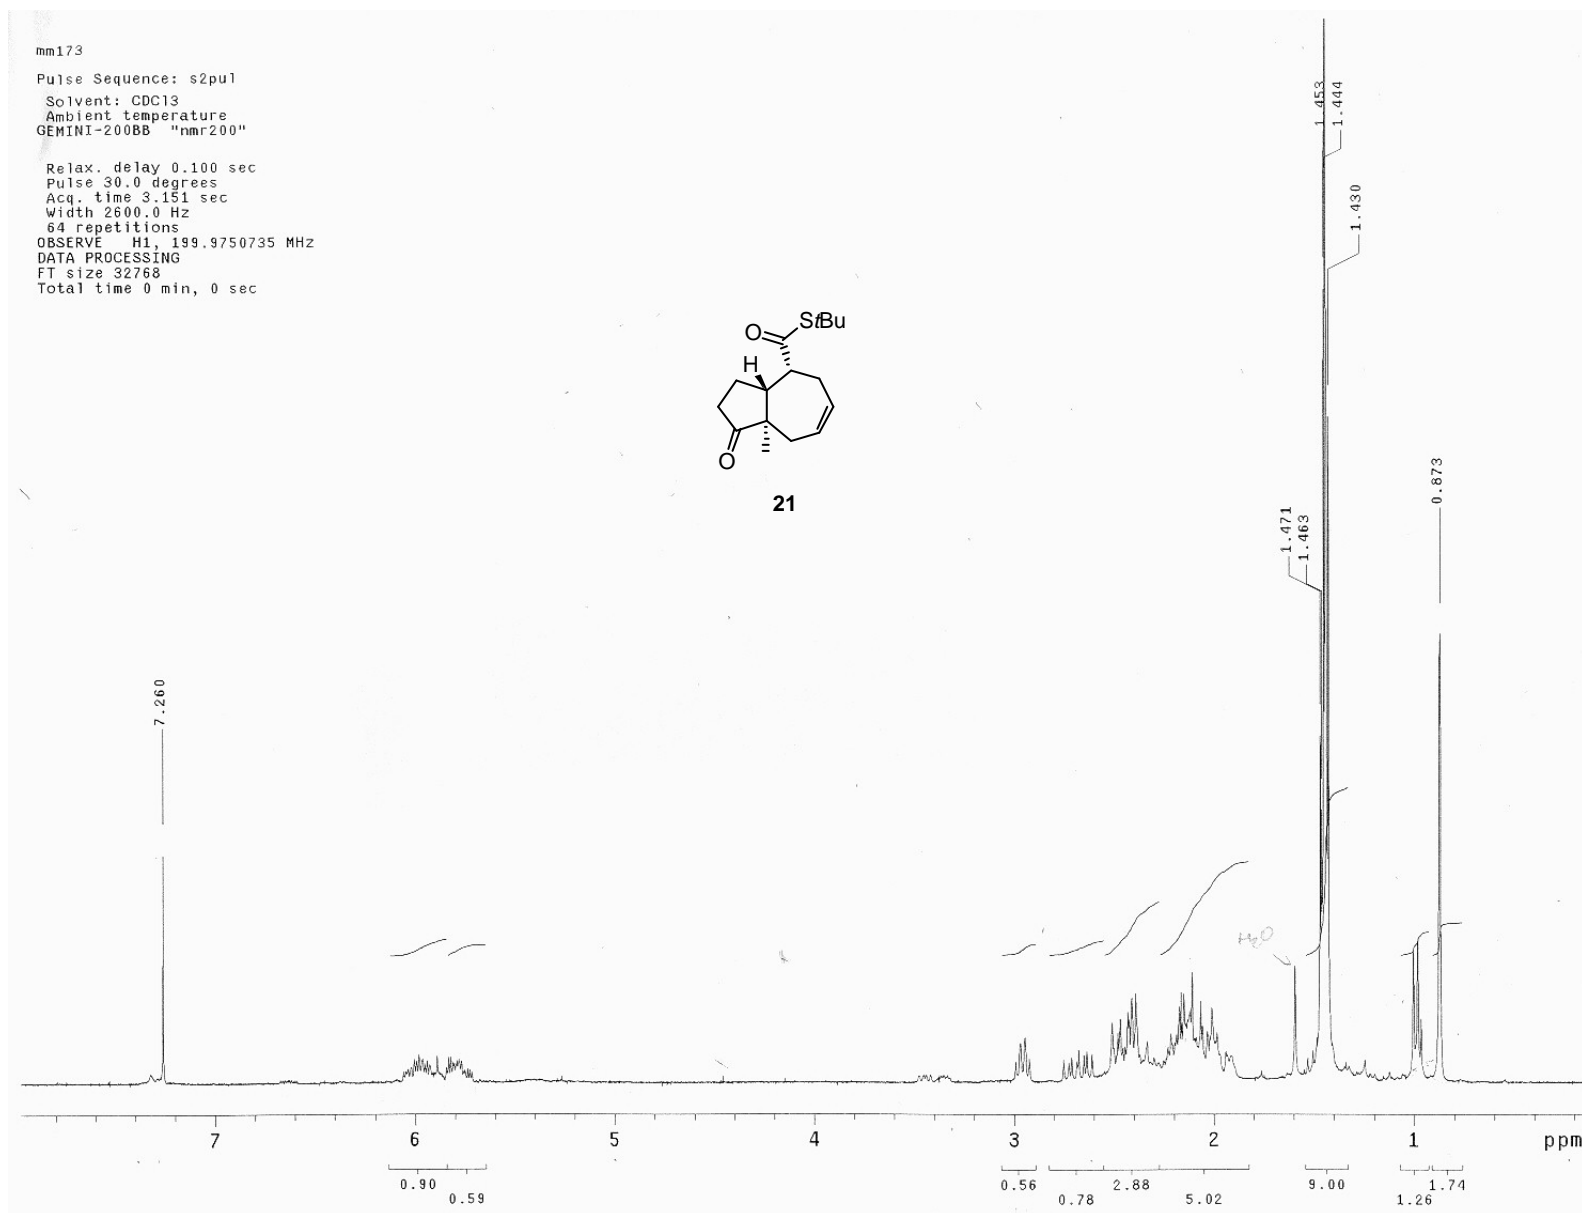

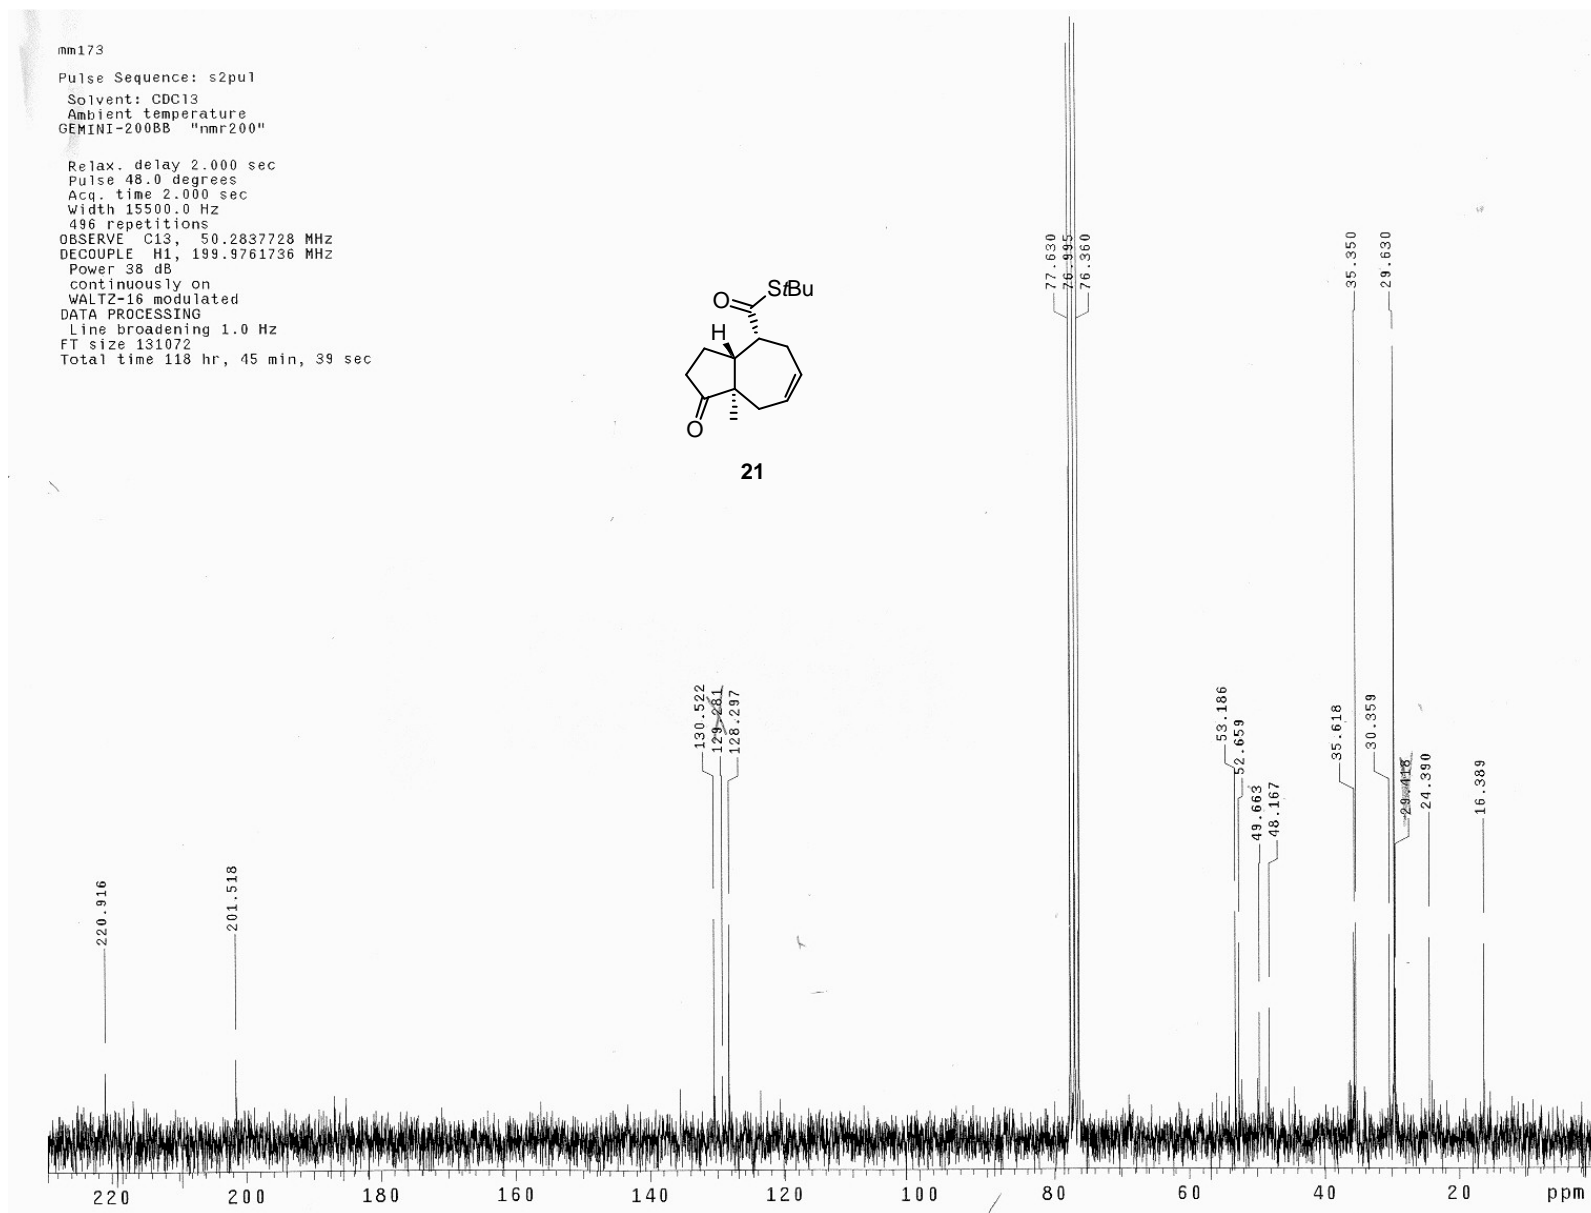

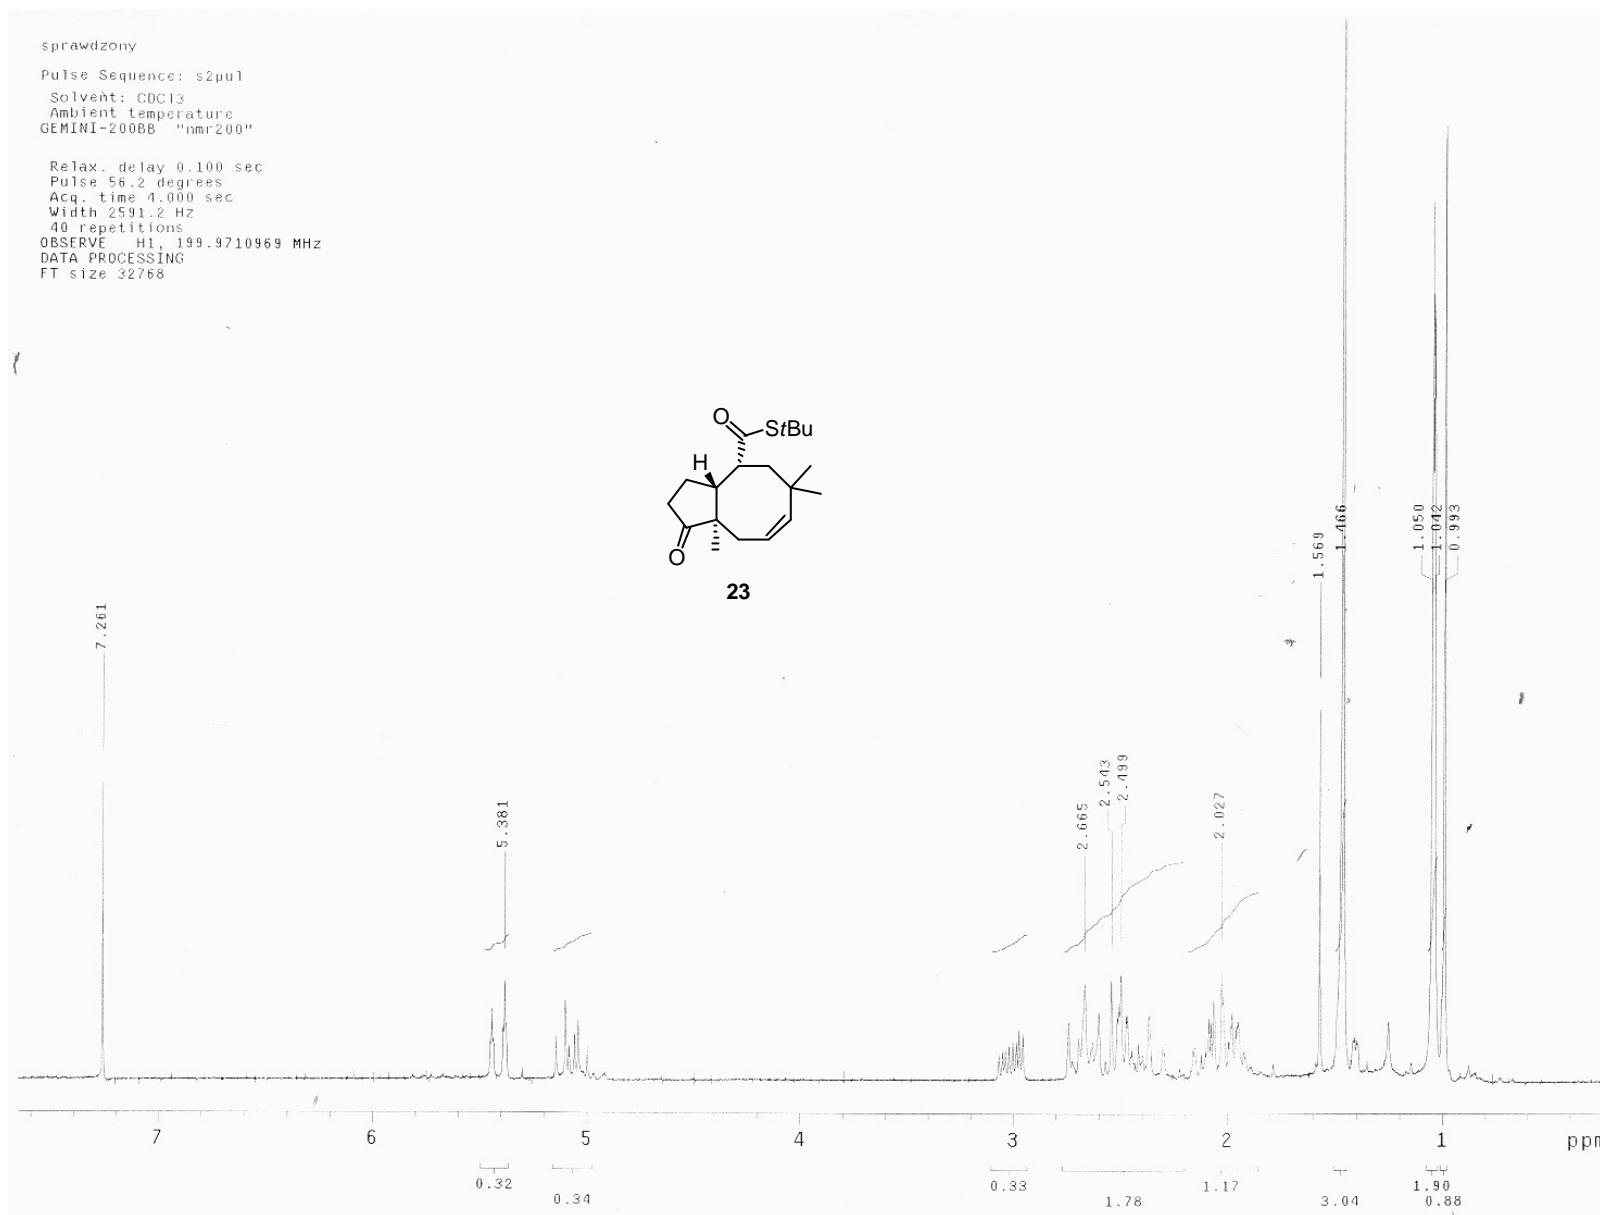

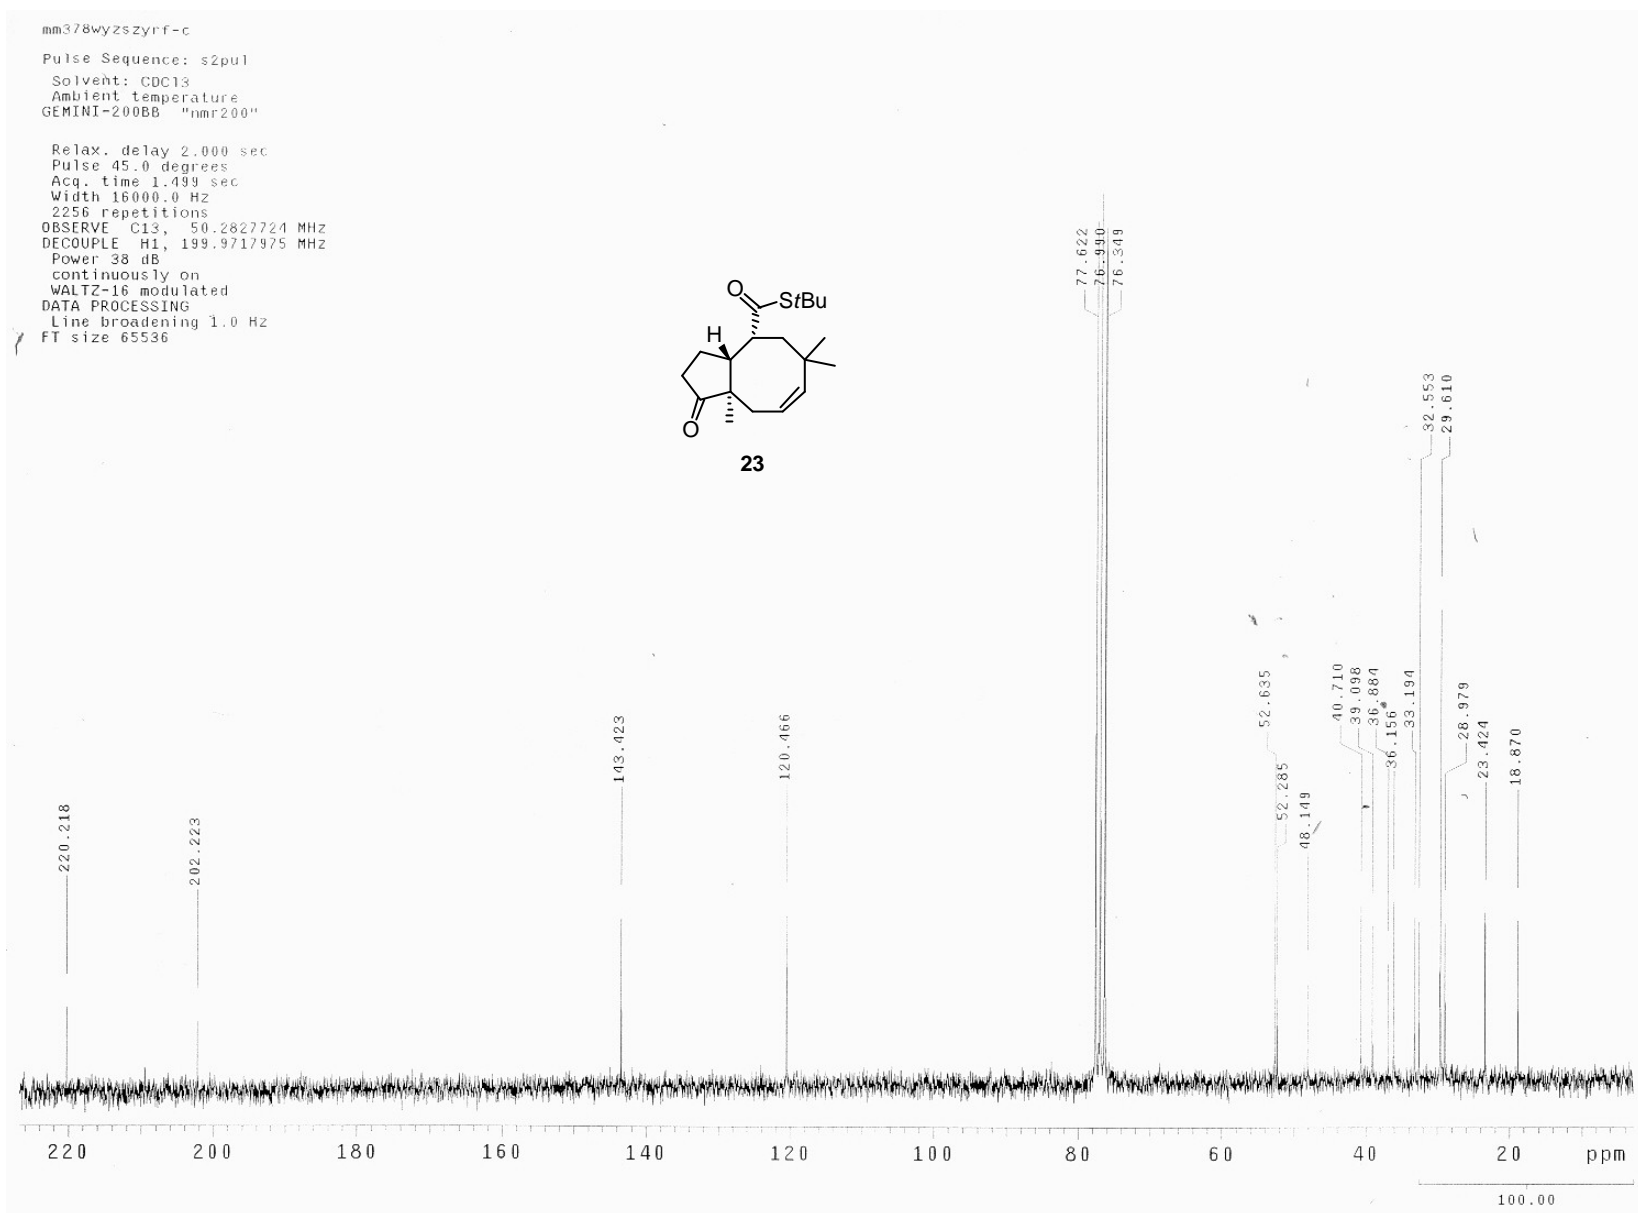

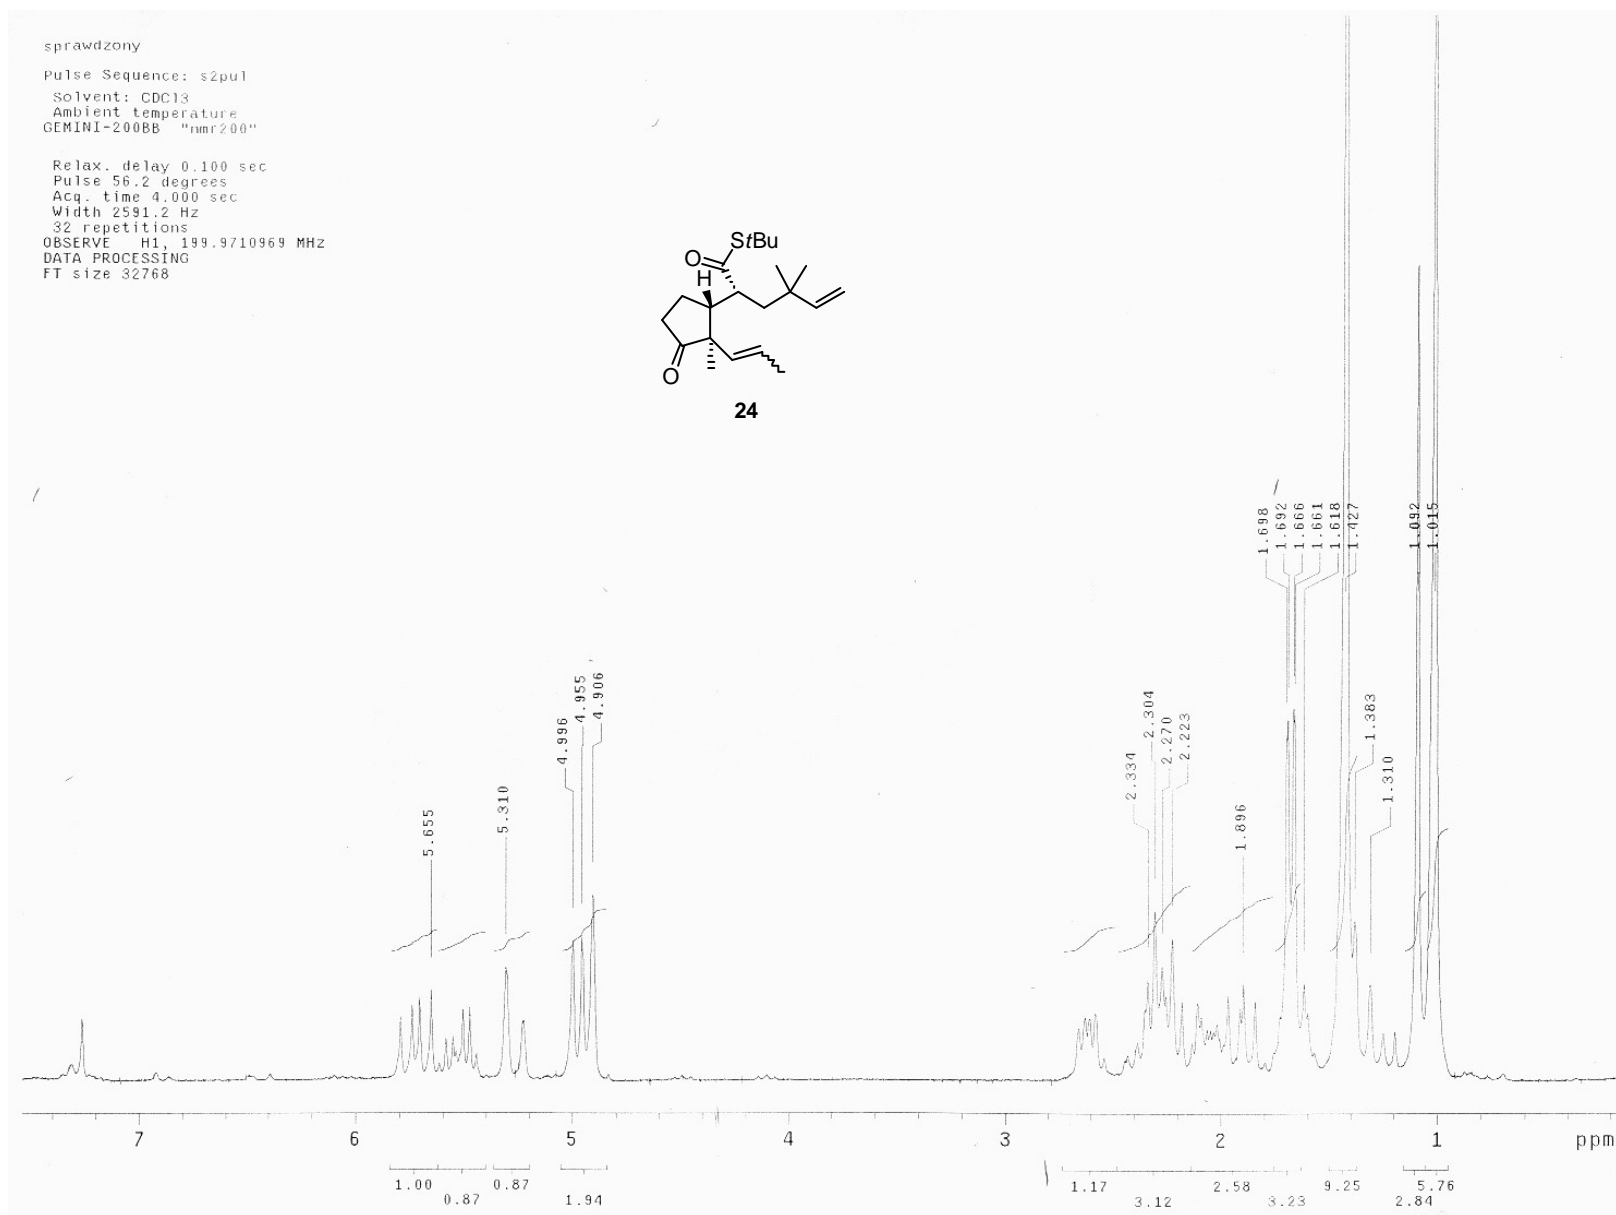

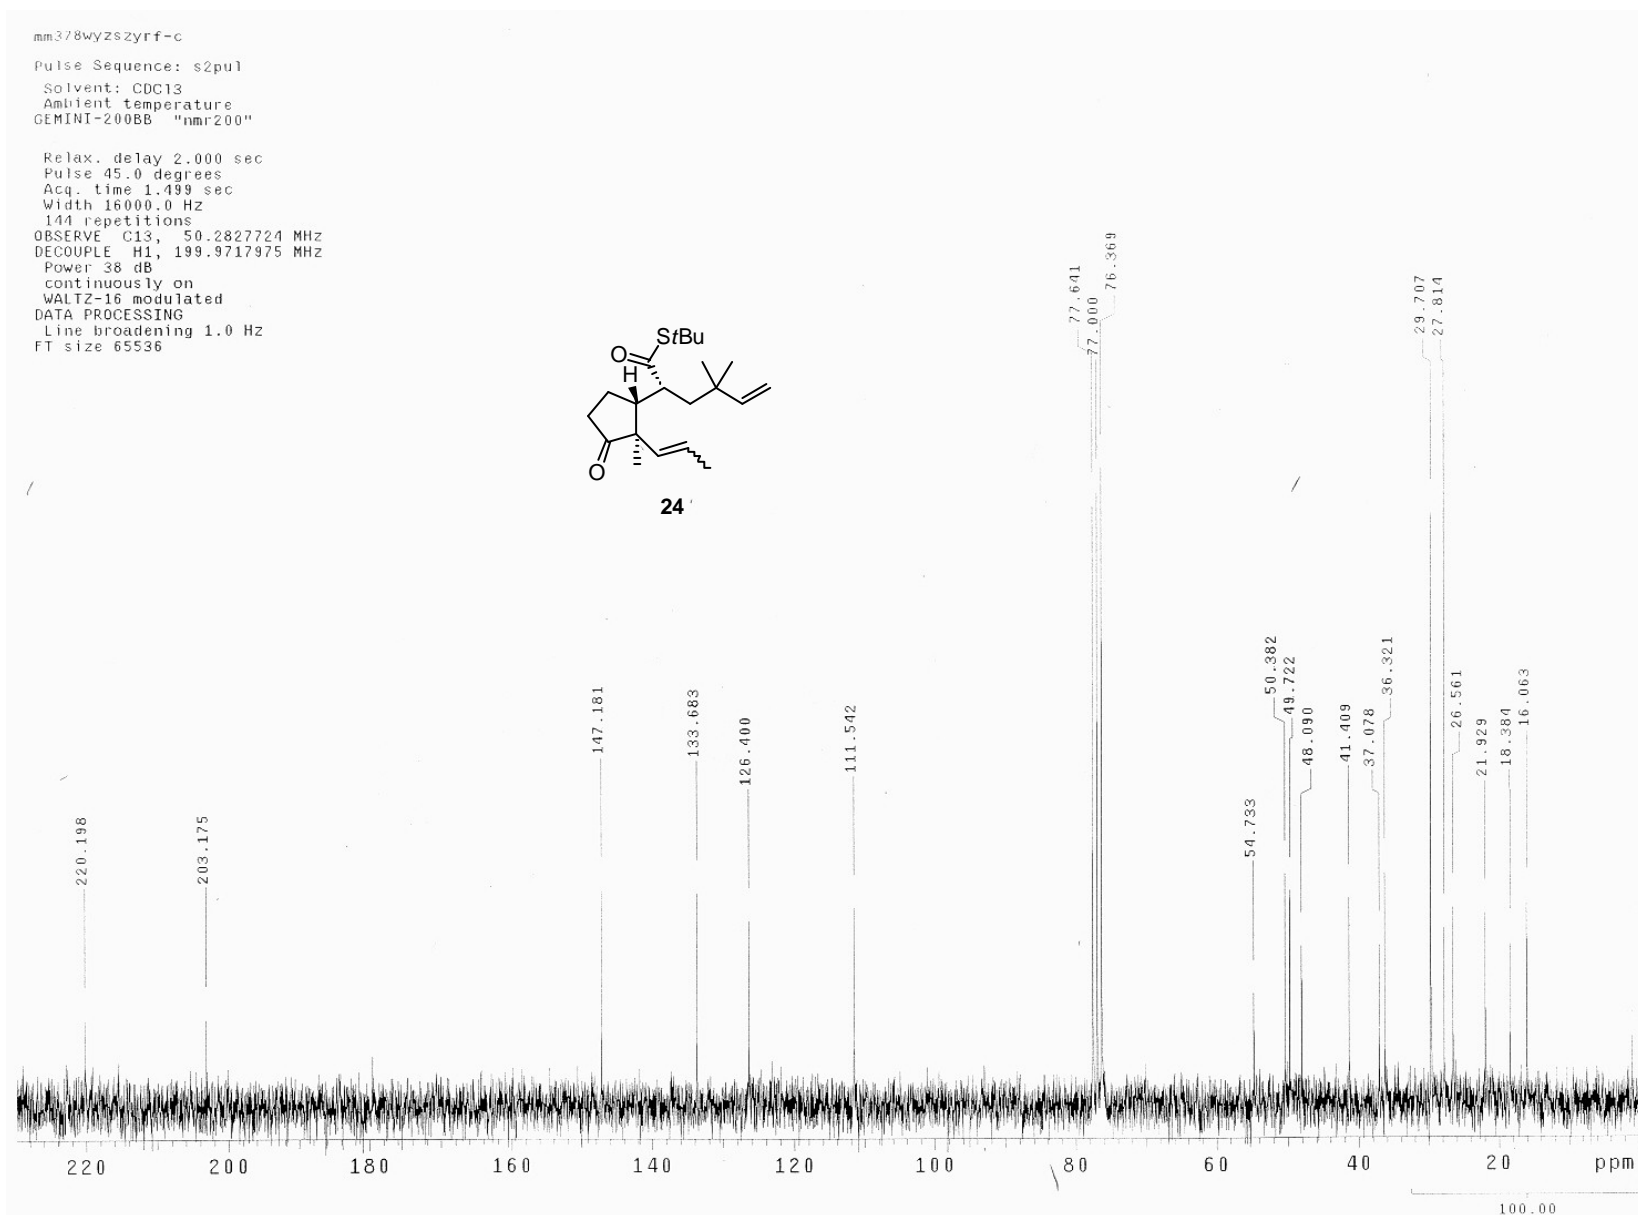

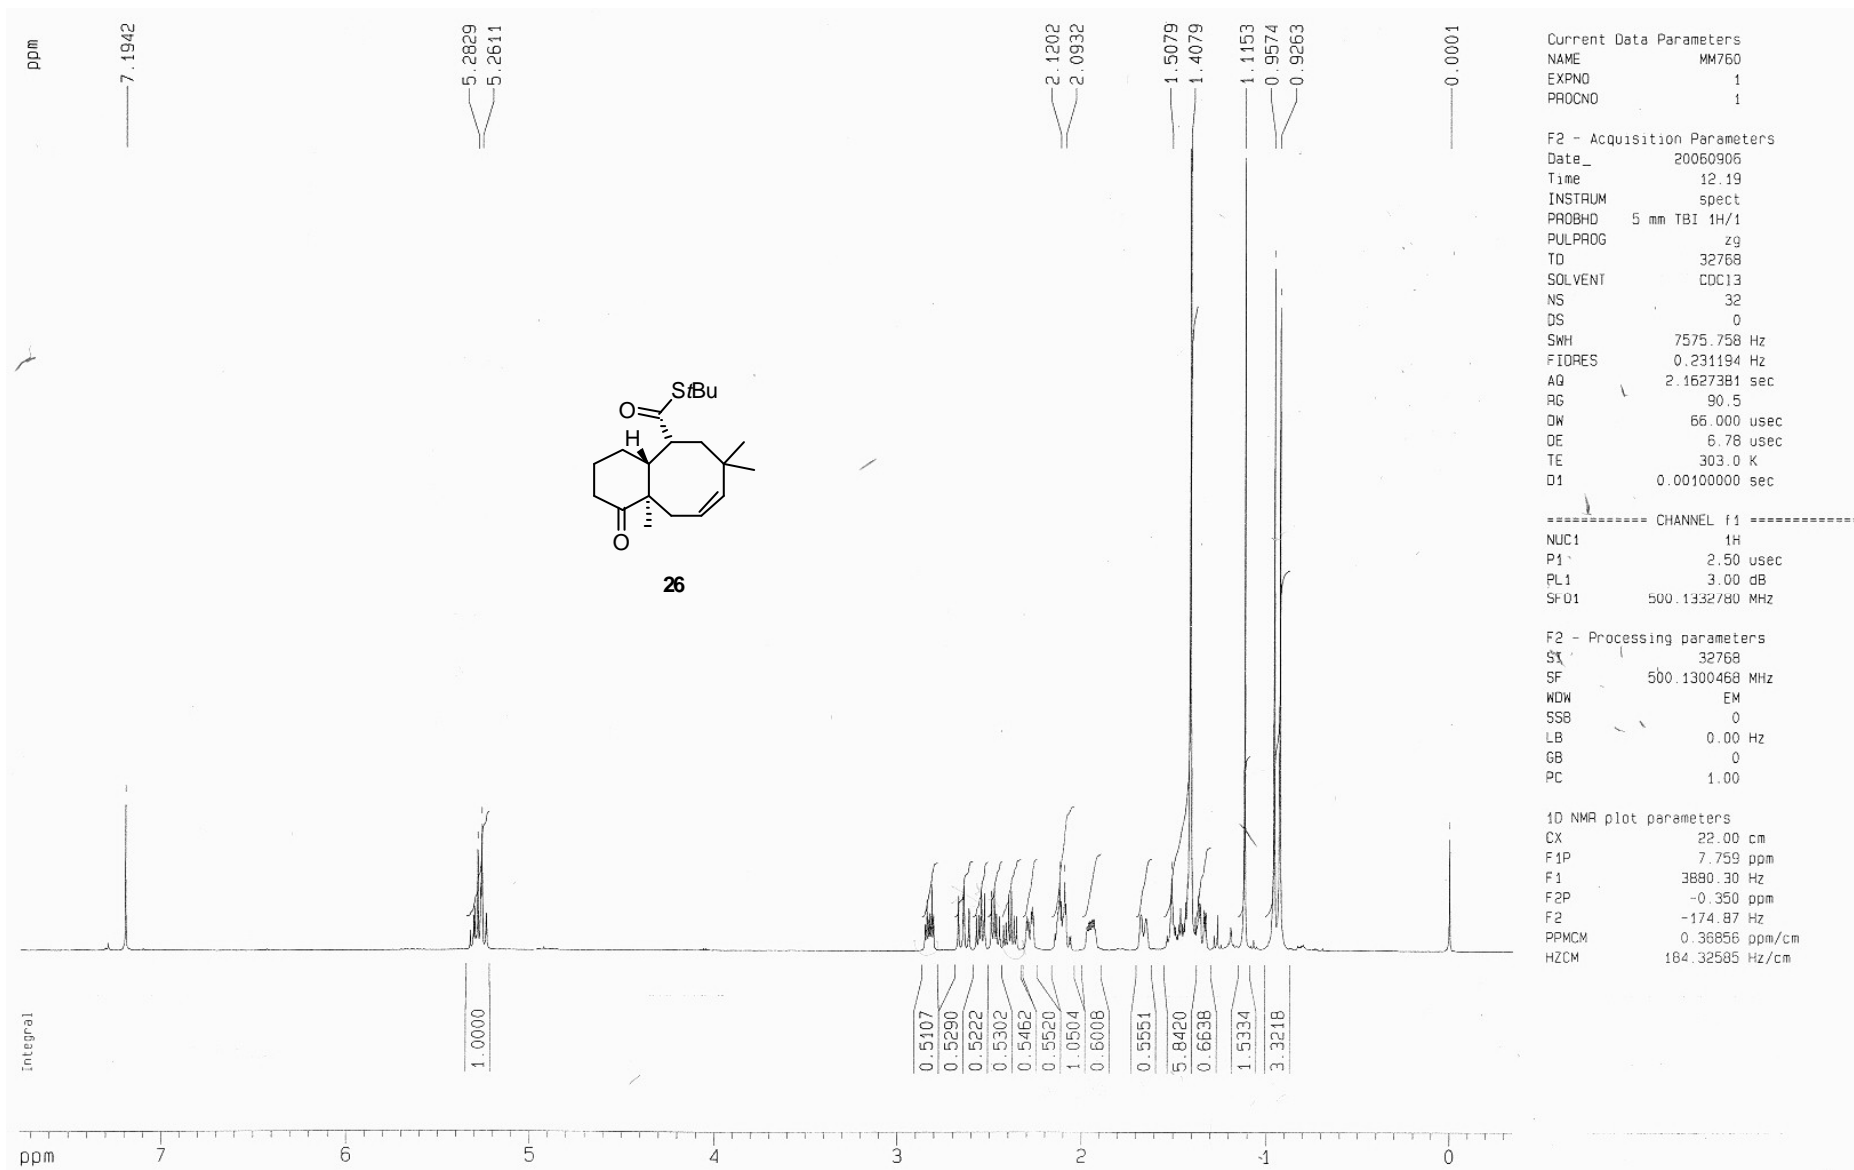



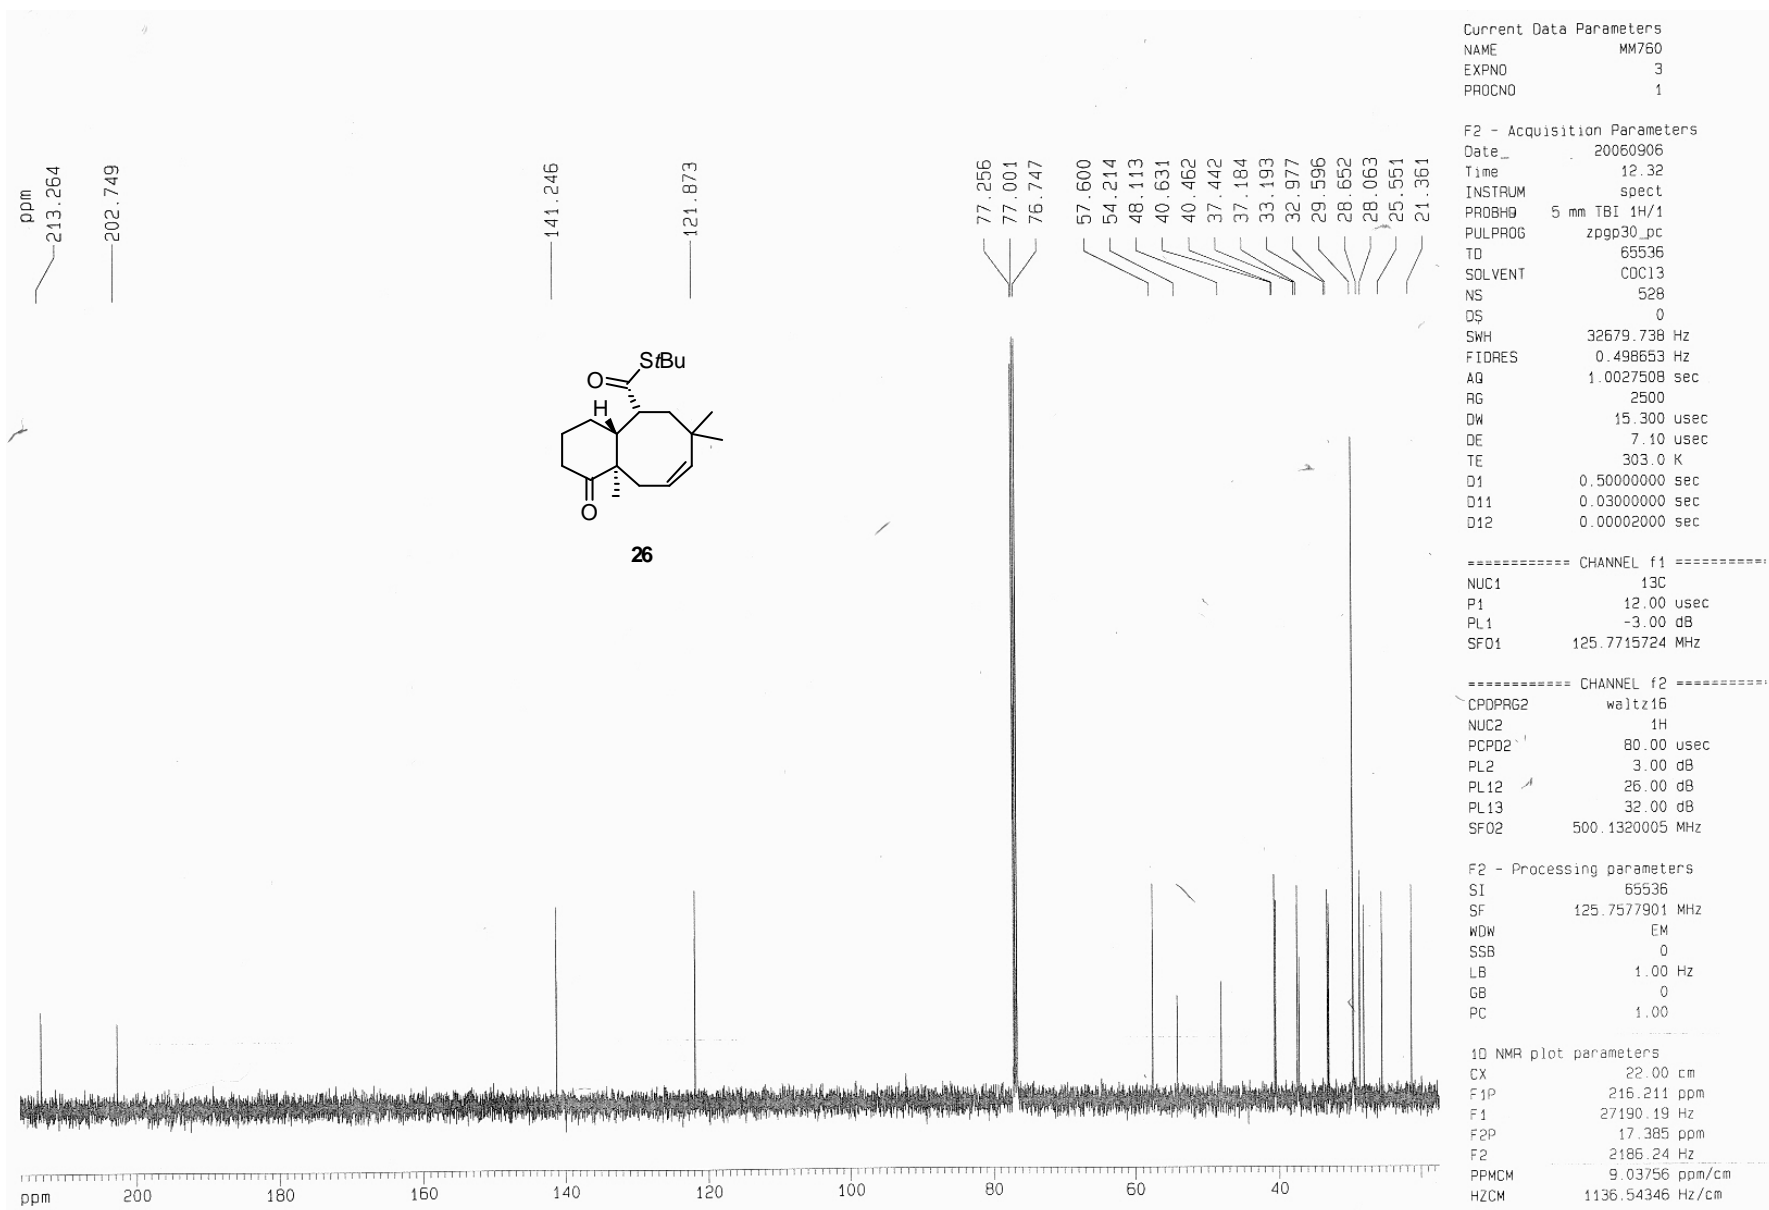

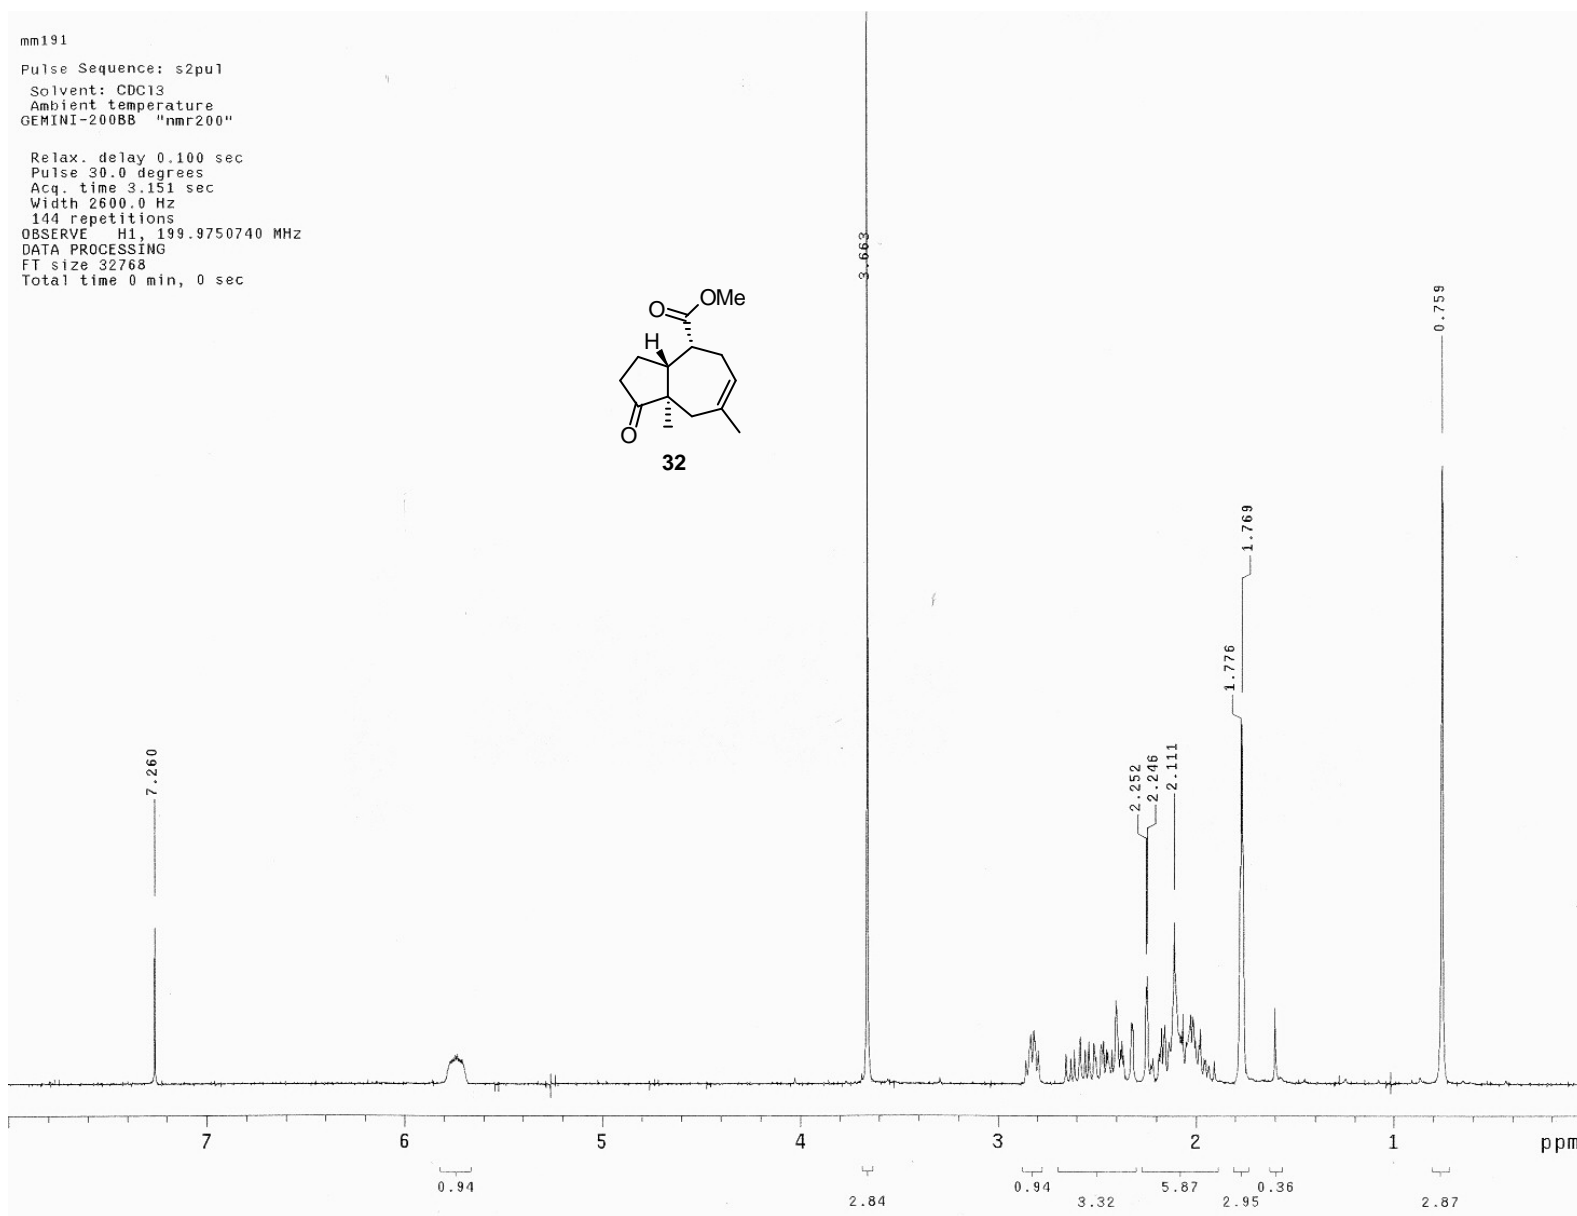

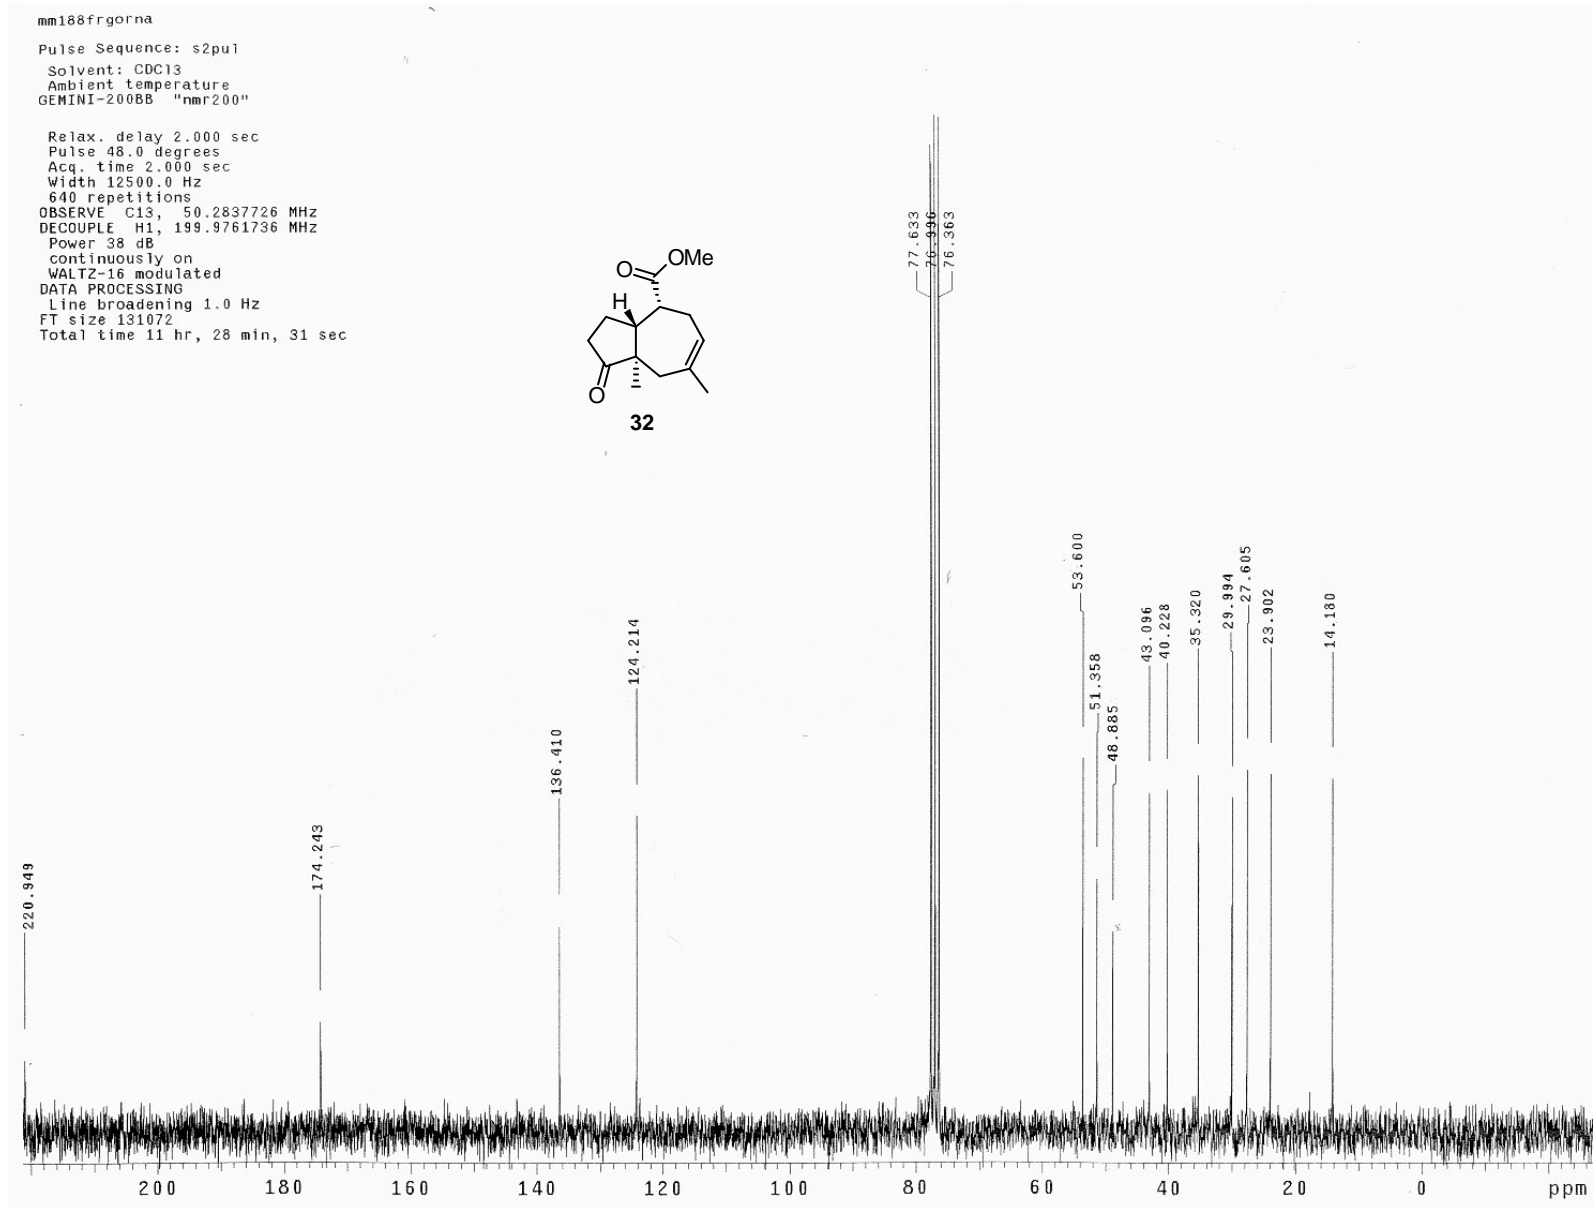

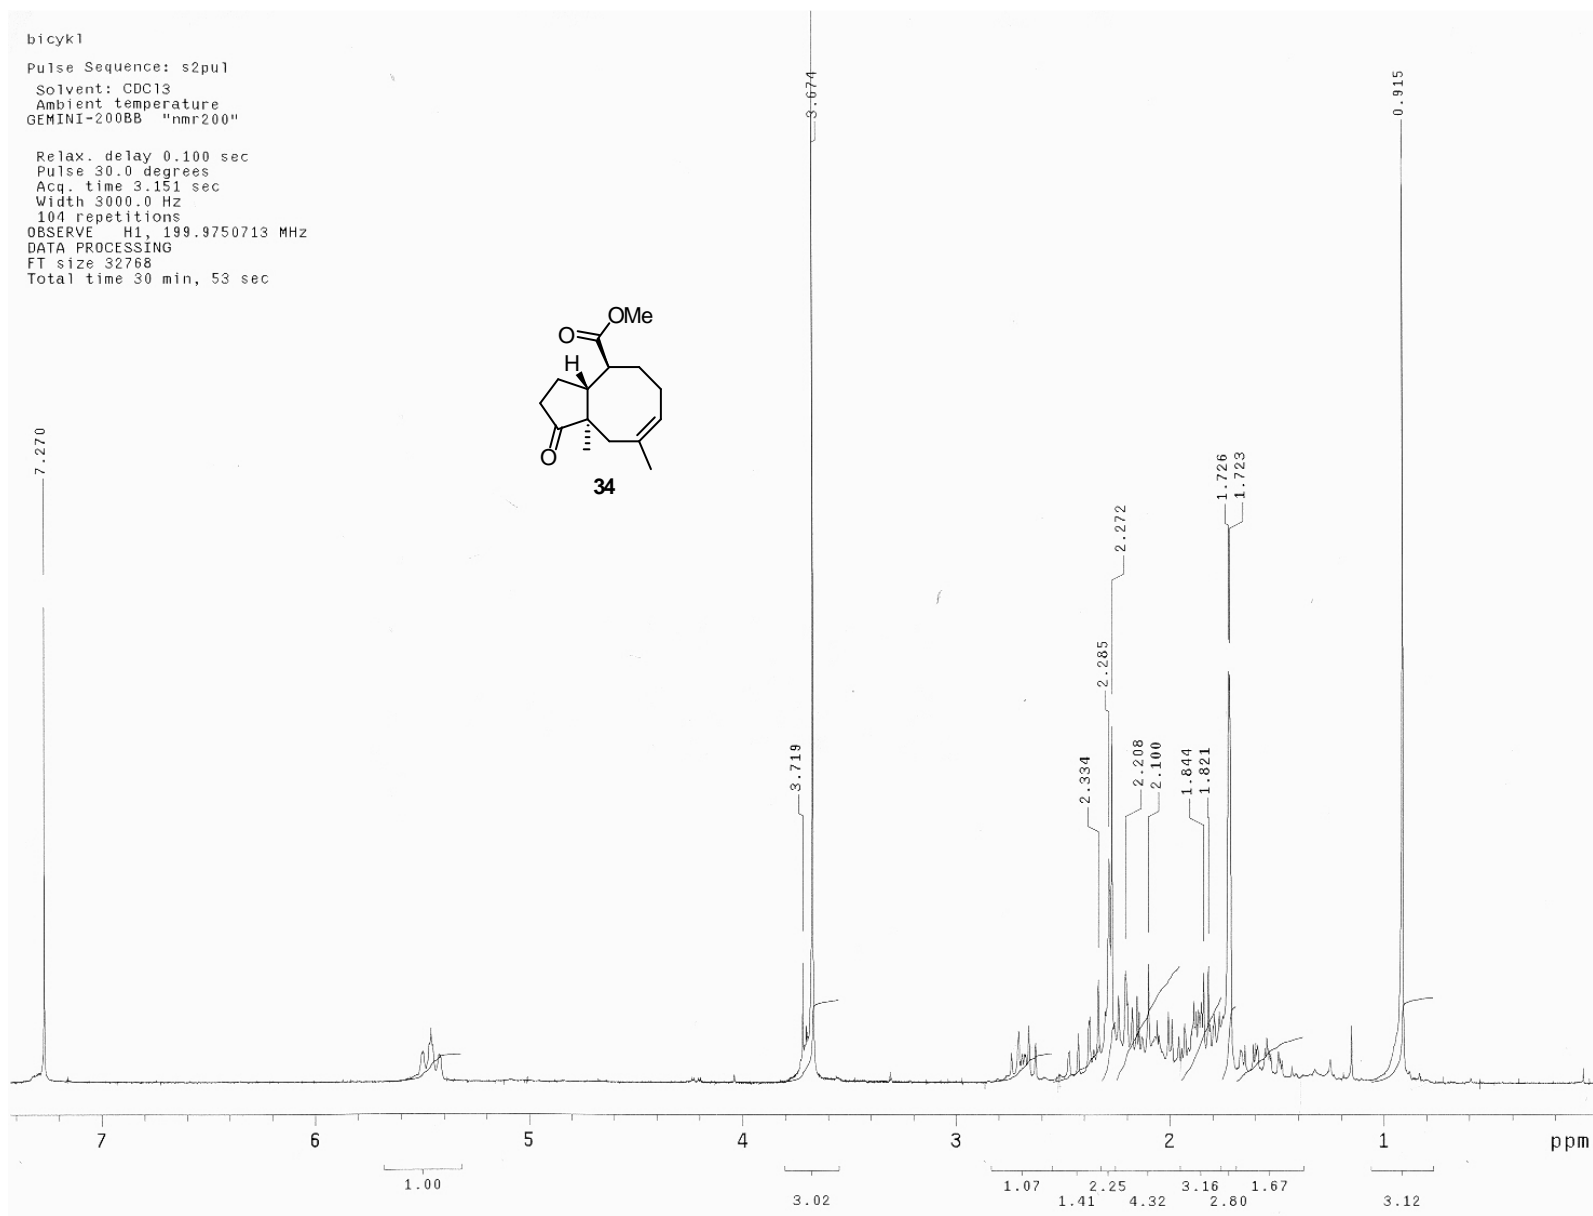

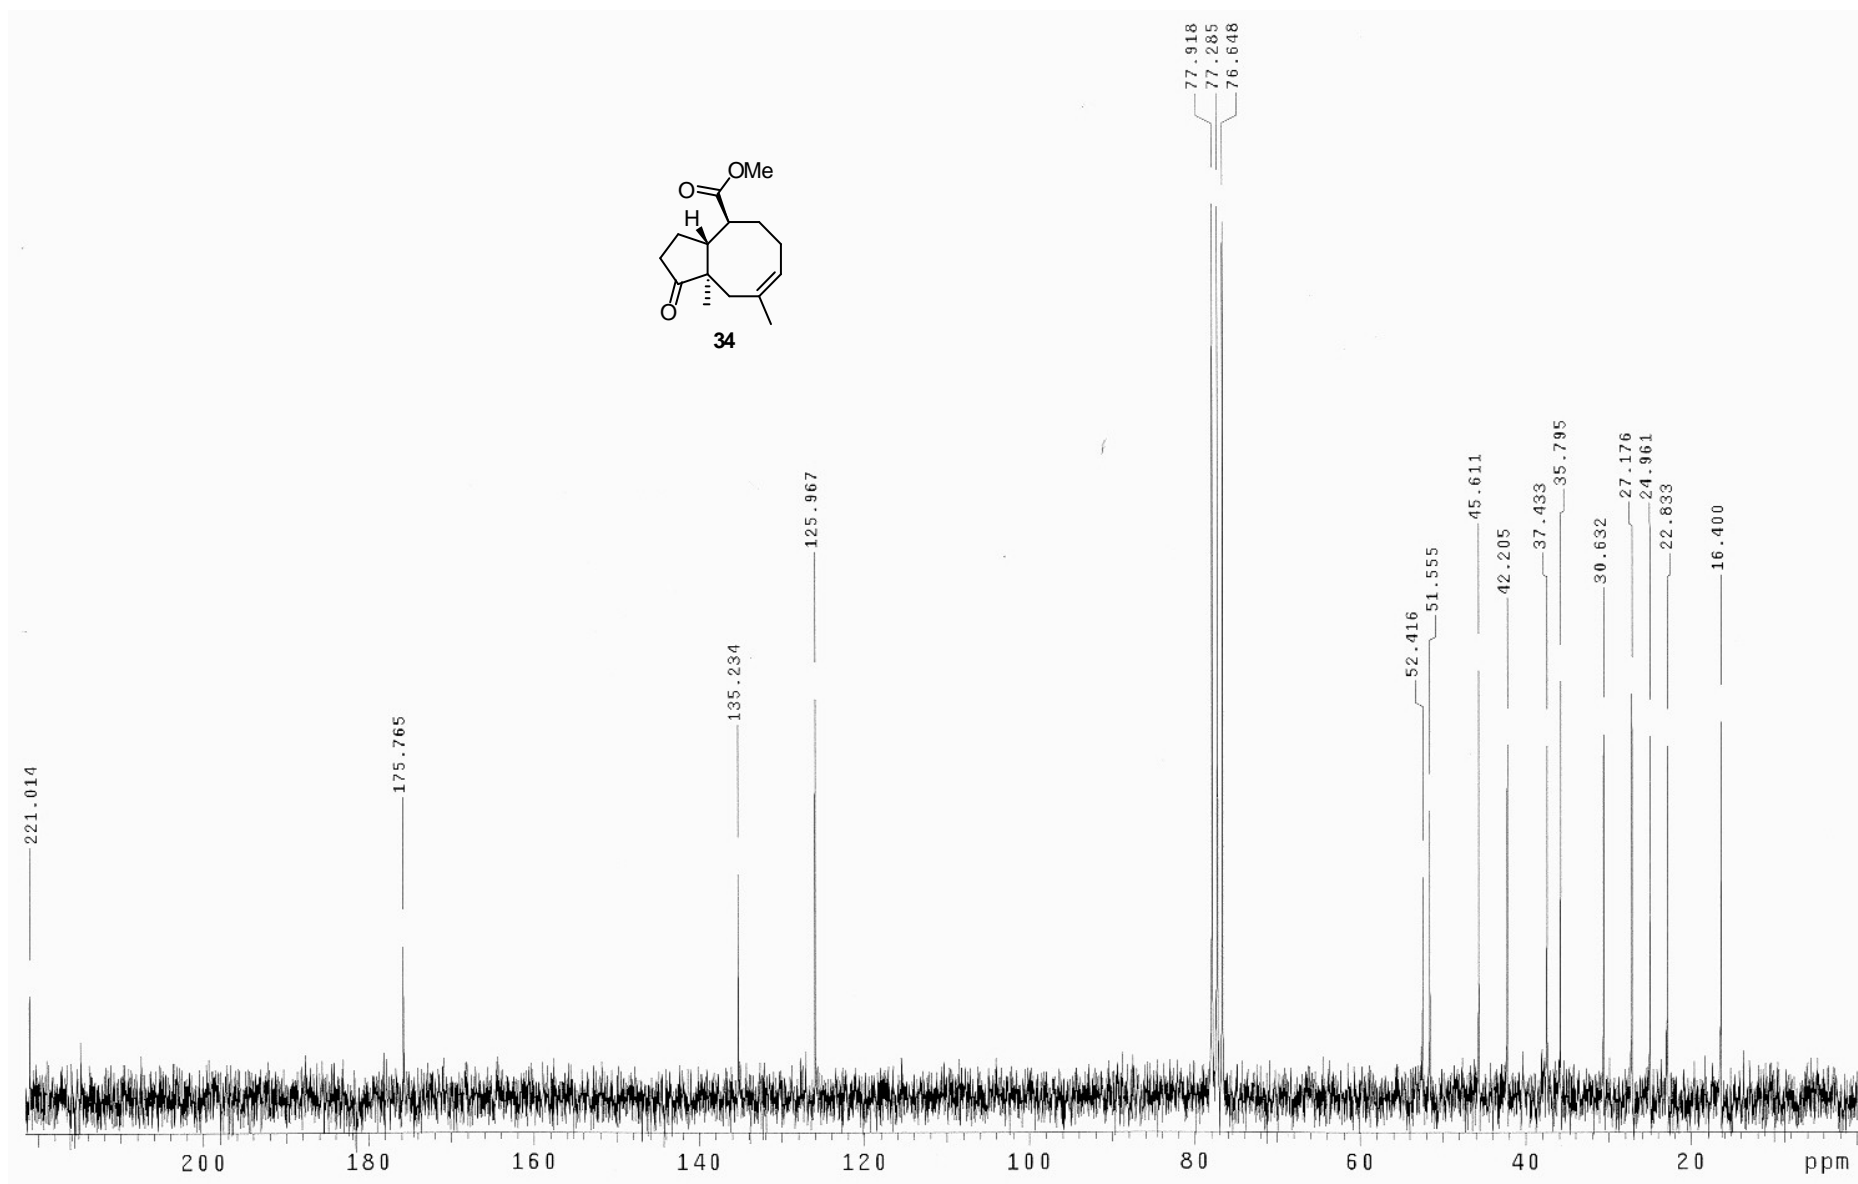

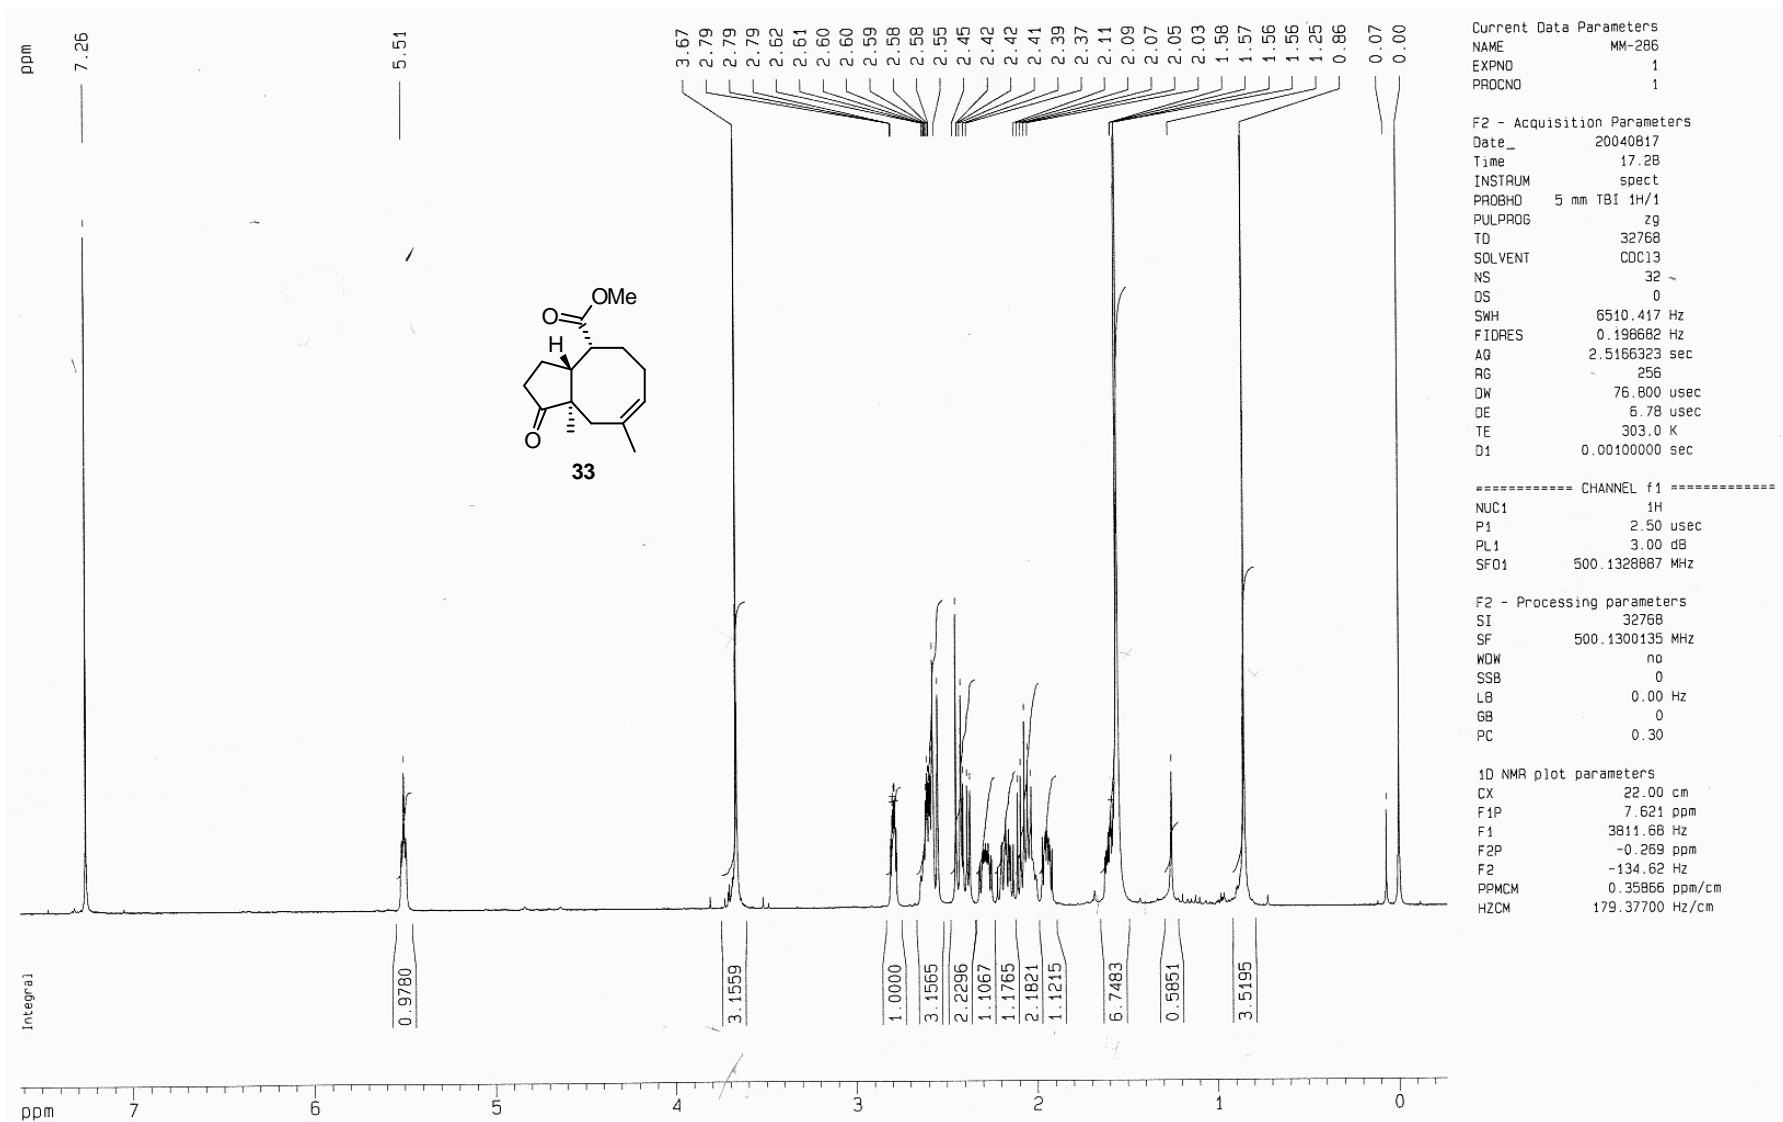

mm286cwyzrf

Pulse Sequence: s2pu1

Solvent: CDCl<sub>3</sub>

Ambient temperature

GEMINI-200BB "nmr200"

Relax. delay 2.000 sec

Pulse 45.0 degrees

Acq. time 1.489 sec

Width 14000.0 Hz

1280 repetitions

OBSERVE C13, 50.2827750 MHz

DECOUPLE H1, 199.9717975 MHz

Power 38 dB

continuously on

WALTZ-16 modulated

DATA PROCESSING

Line broadening 1.0 Hz

FT size 65536

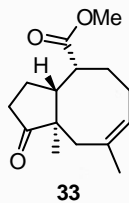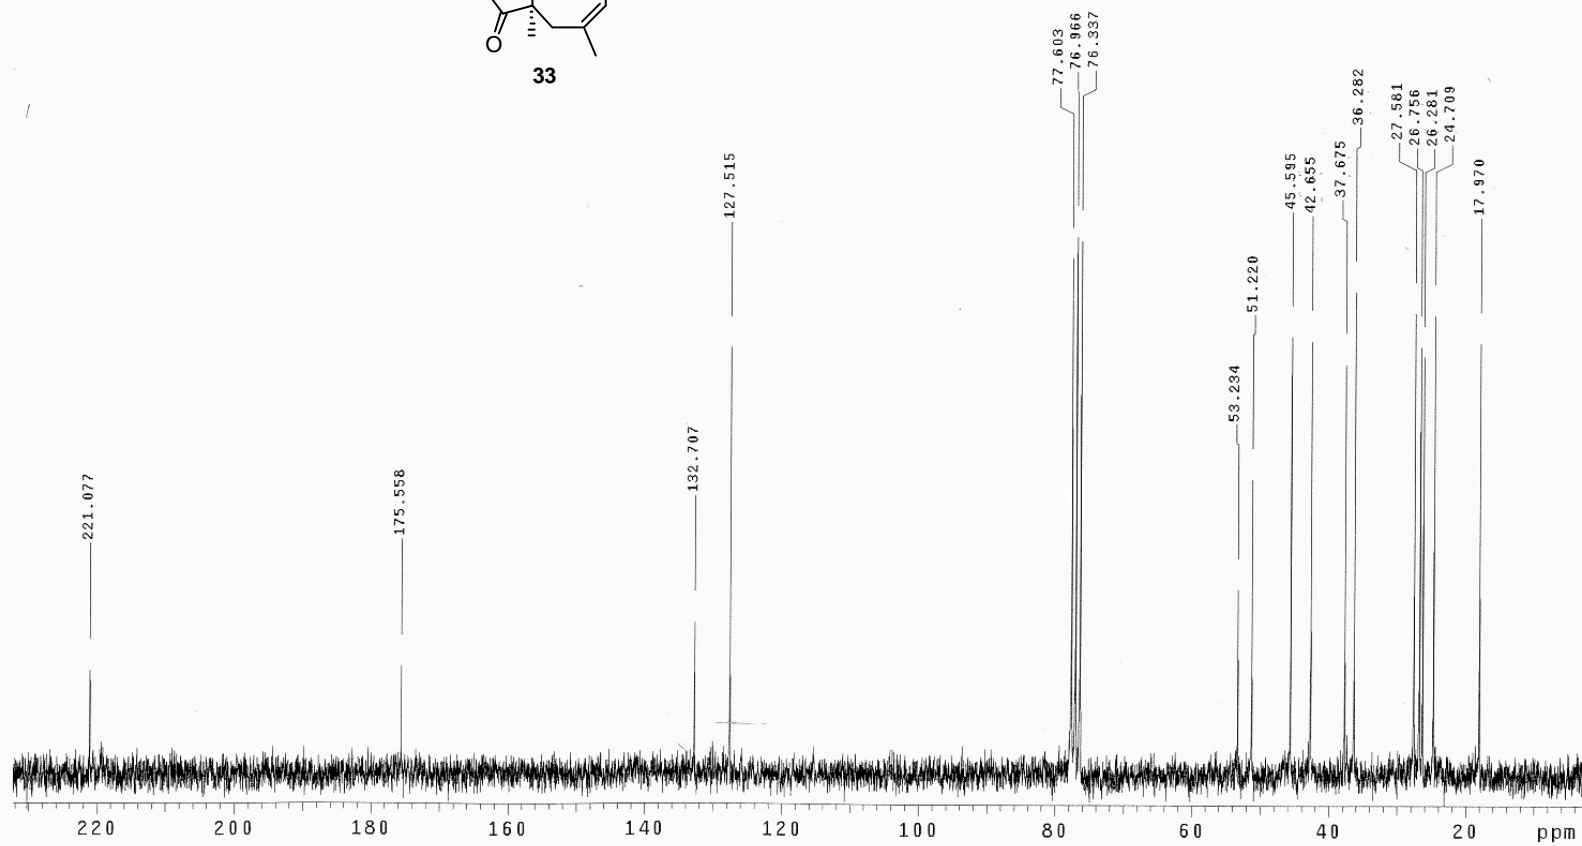

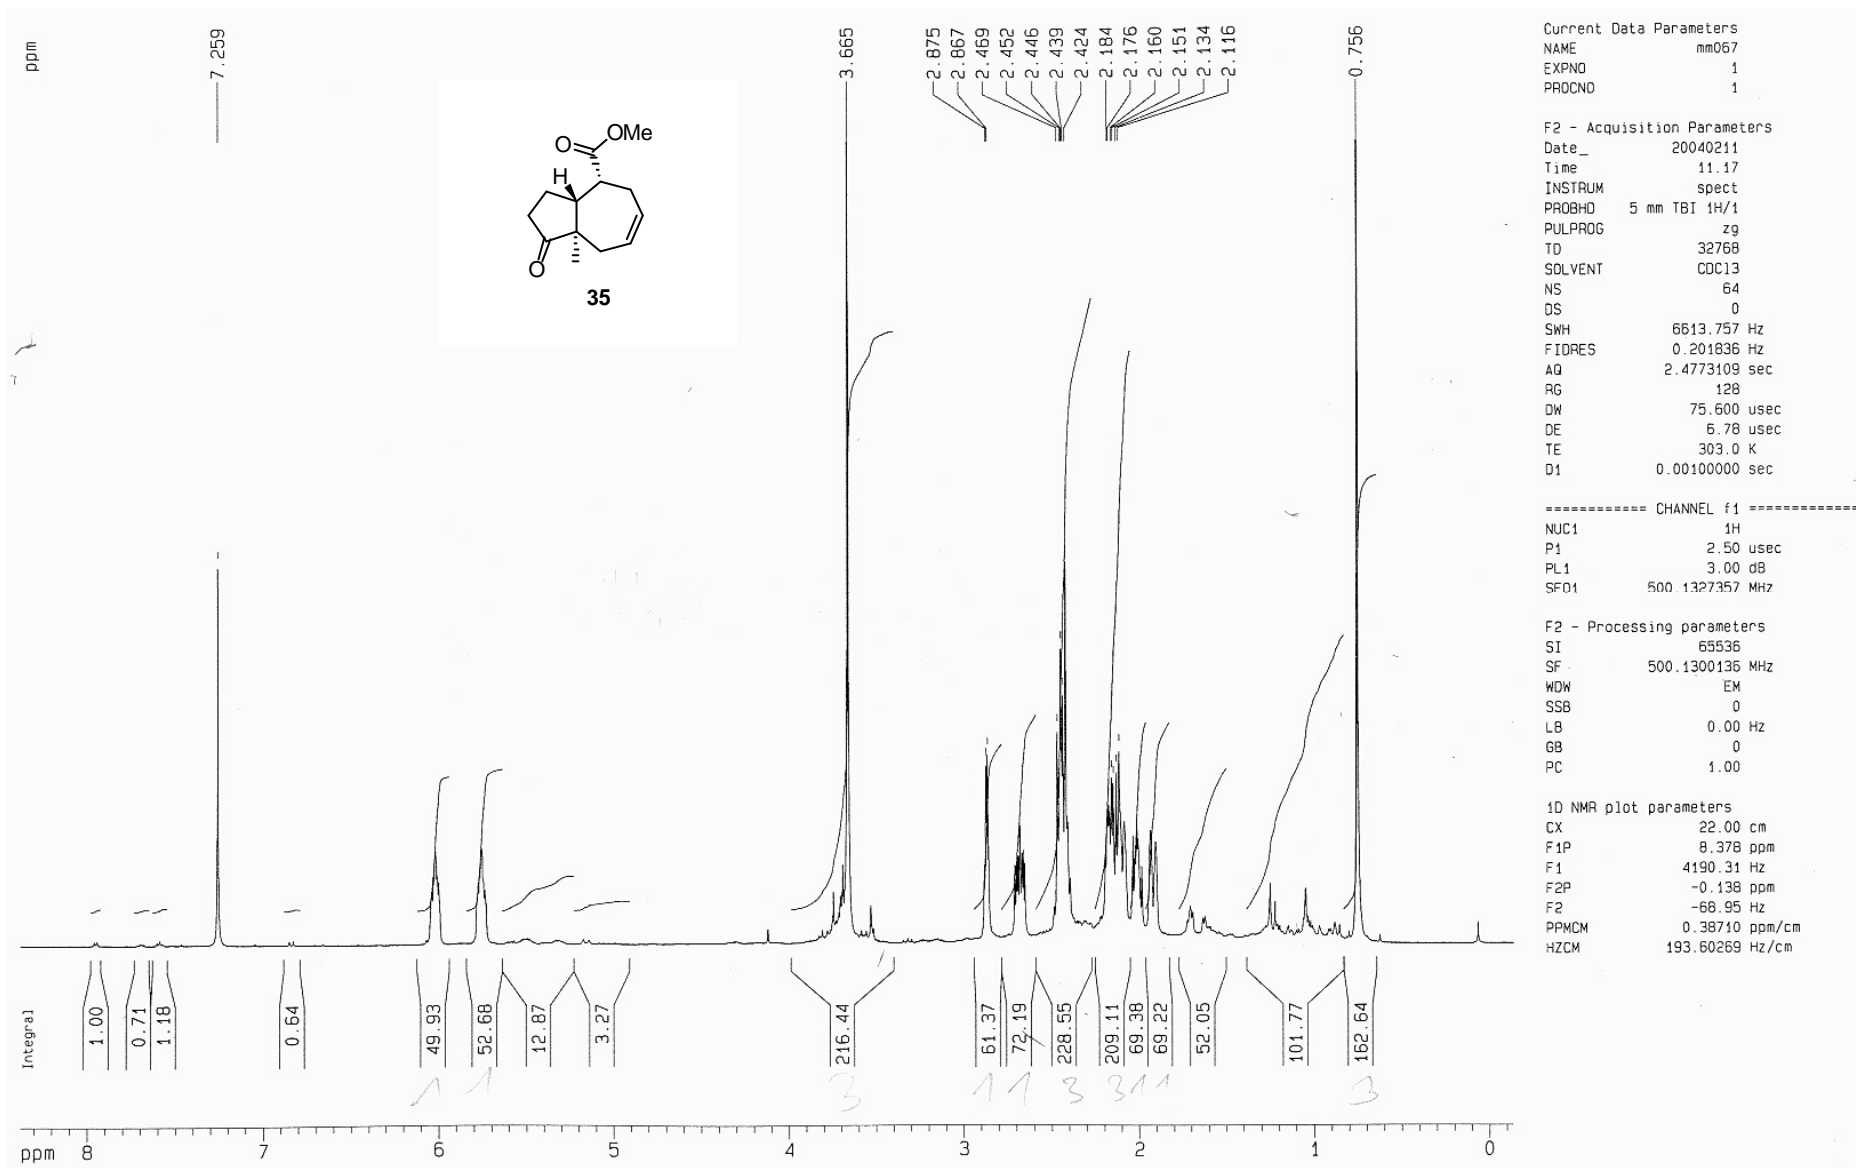



bicyklo z benzylem  
mm081c  
Pulse Sequence: s2pu1  
Solvent: CDC13  
Ambient temperature  
GEMINI-200BB "nmr200"  
Relax. delay 2.000 sec  
Pulse 48.0 degrees  
Acq. time 2.000 sec  
Width 15500.0 Hz  
9824 repetitions  
OBSERVE C13, 50.2837732 MHz  
DECOUPLE H1, 199.9761736 MHz  
Power 38 dB  
continuously on  
WALTZ-16 modulated  
DATA PROCESSING  
Line broadening 1.0 Hz  
FT size 131072  
Total time 23 hr, 4 min, 30 sec

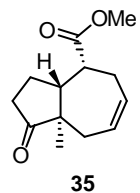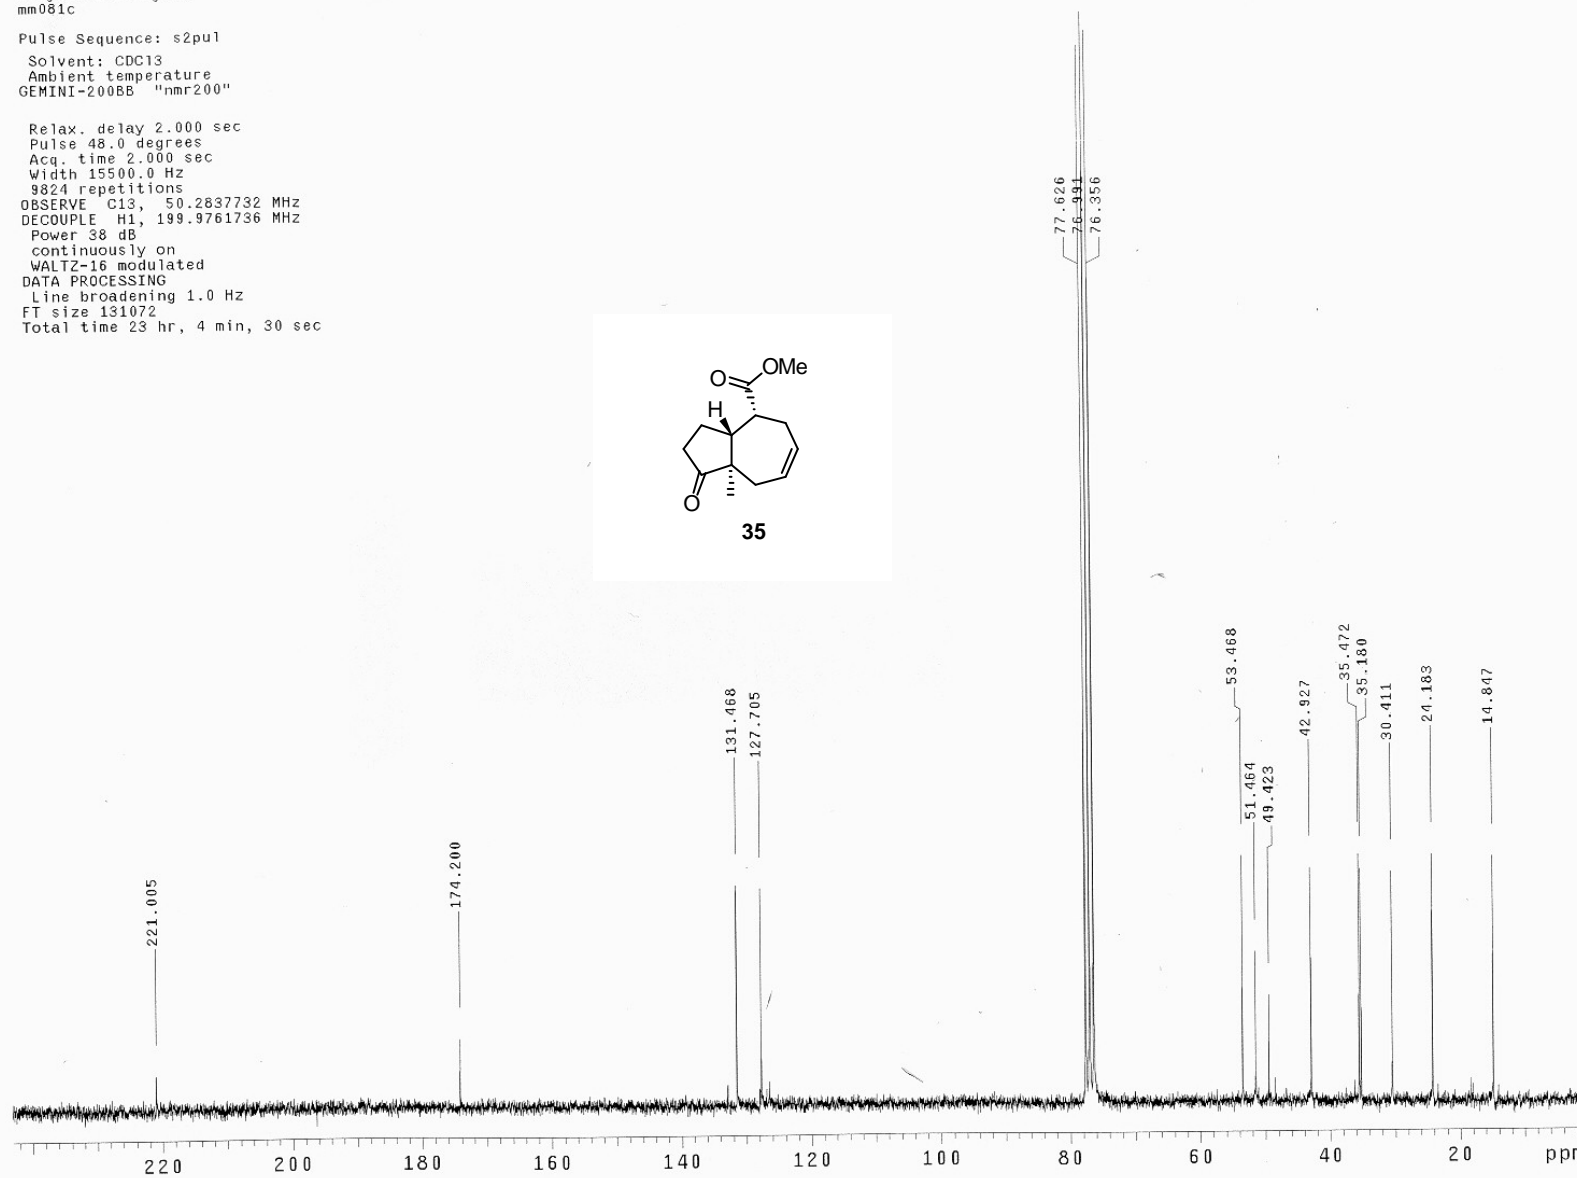

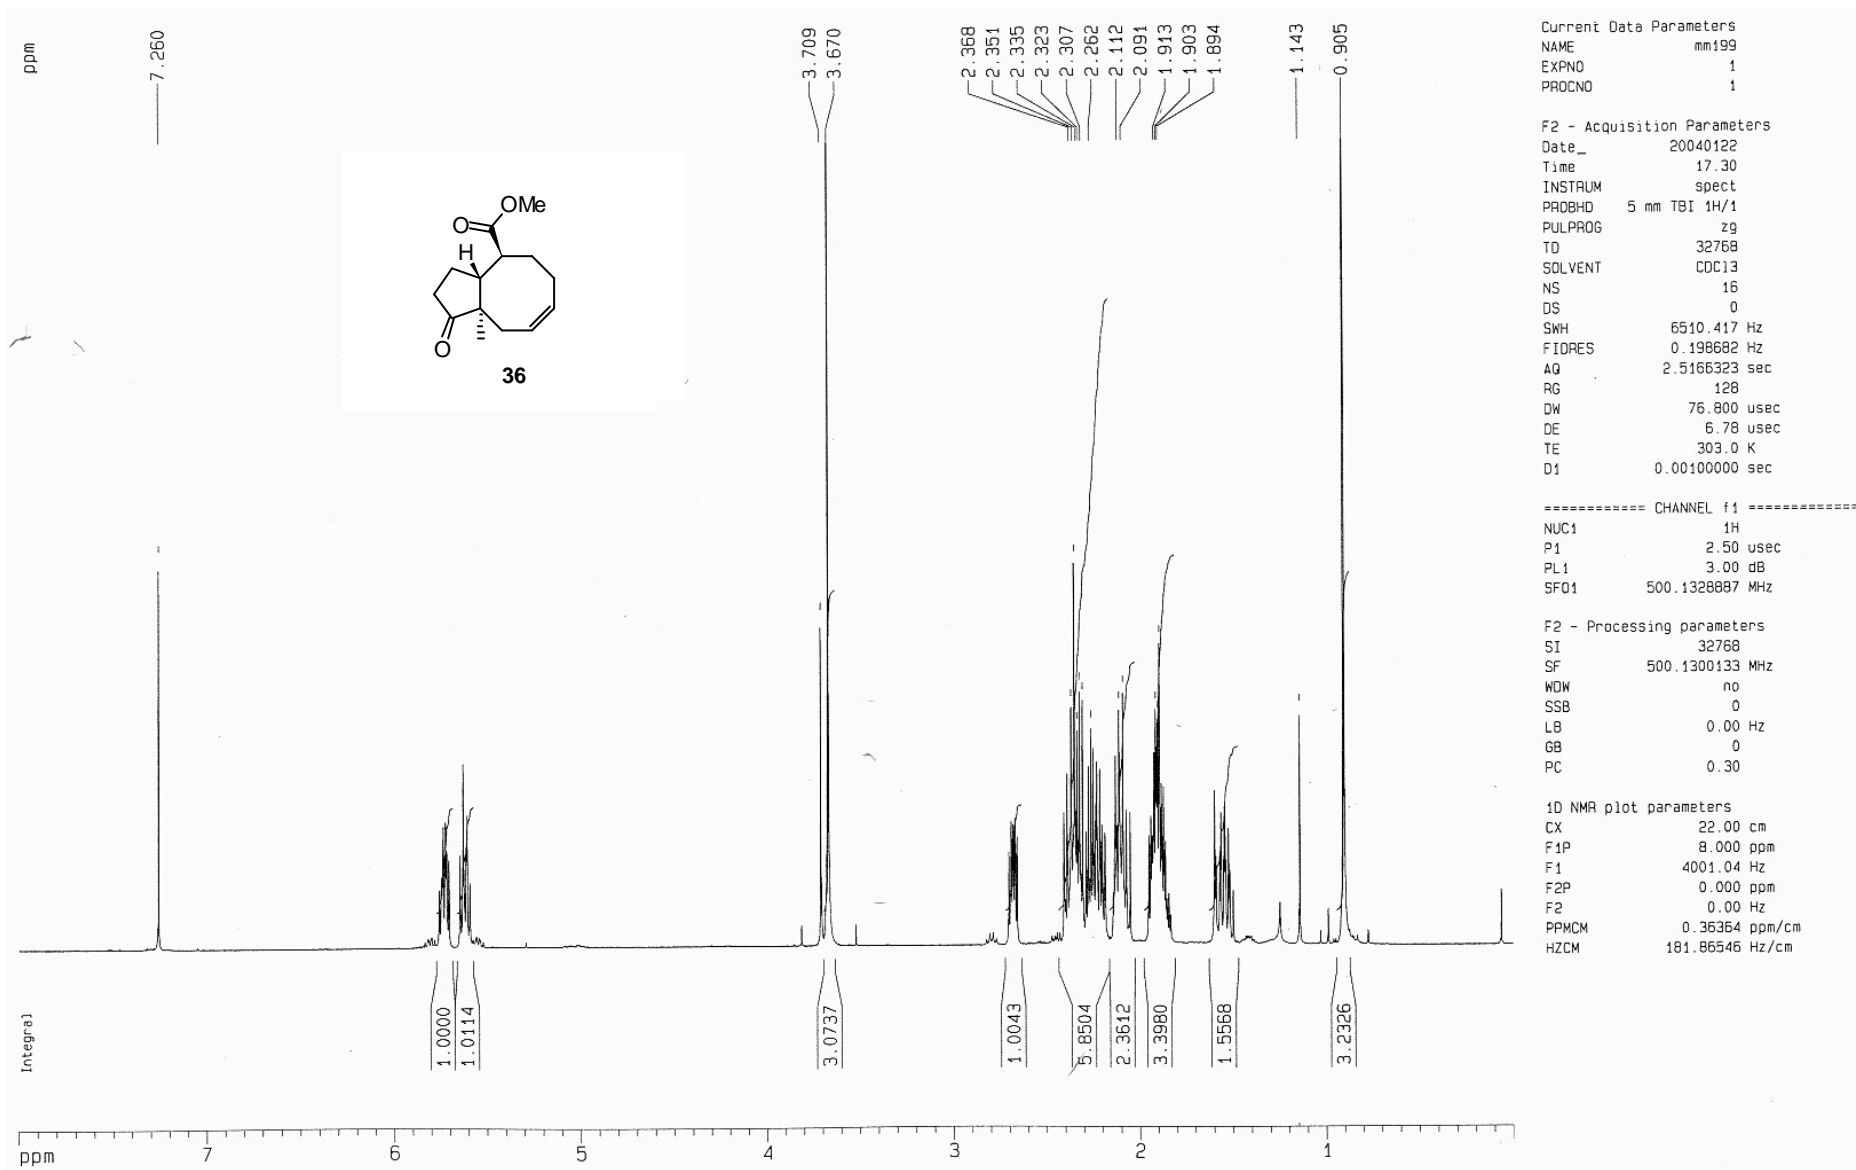

bicyklo z benzylem  
mm081c  
Pulse Sequence: s2pul  
Solvent: CDCl3  
Ambient temperature  
GEMINI-200BB "nmr200"

Relax. delay 2.000 sec  
Pulse 48.0 degrees  
Acq. time 2.000 sec  
Width 15500.0 Hz  
928 repetitions  
OBSERVE C13, 50.2837744 MHz  
DECOUPLE H1, 199.9761736 MHz  
Power 38 dB  
continuously on  
WALTZ-16 modulated  
DATA PROCESSING  
Line broadening 1.0 Hz  
FT size 131072  
Total time 23 hr, 4 min, 30 sec

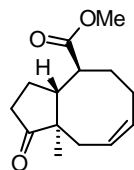

36

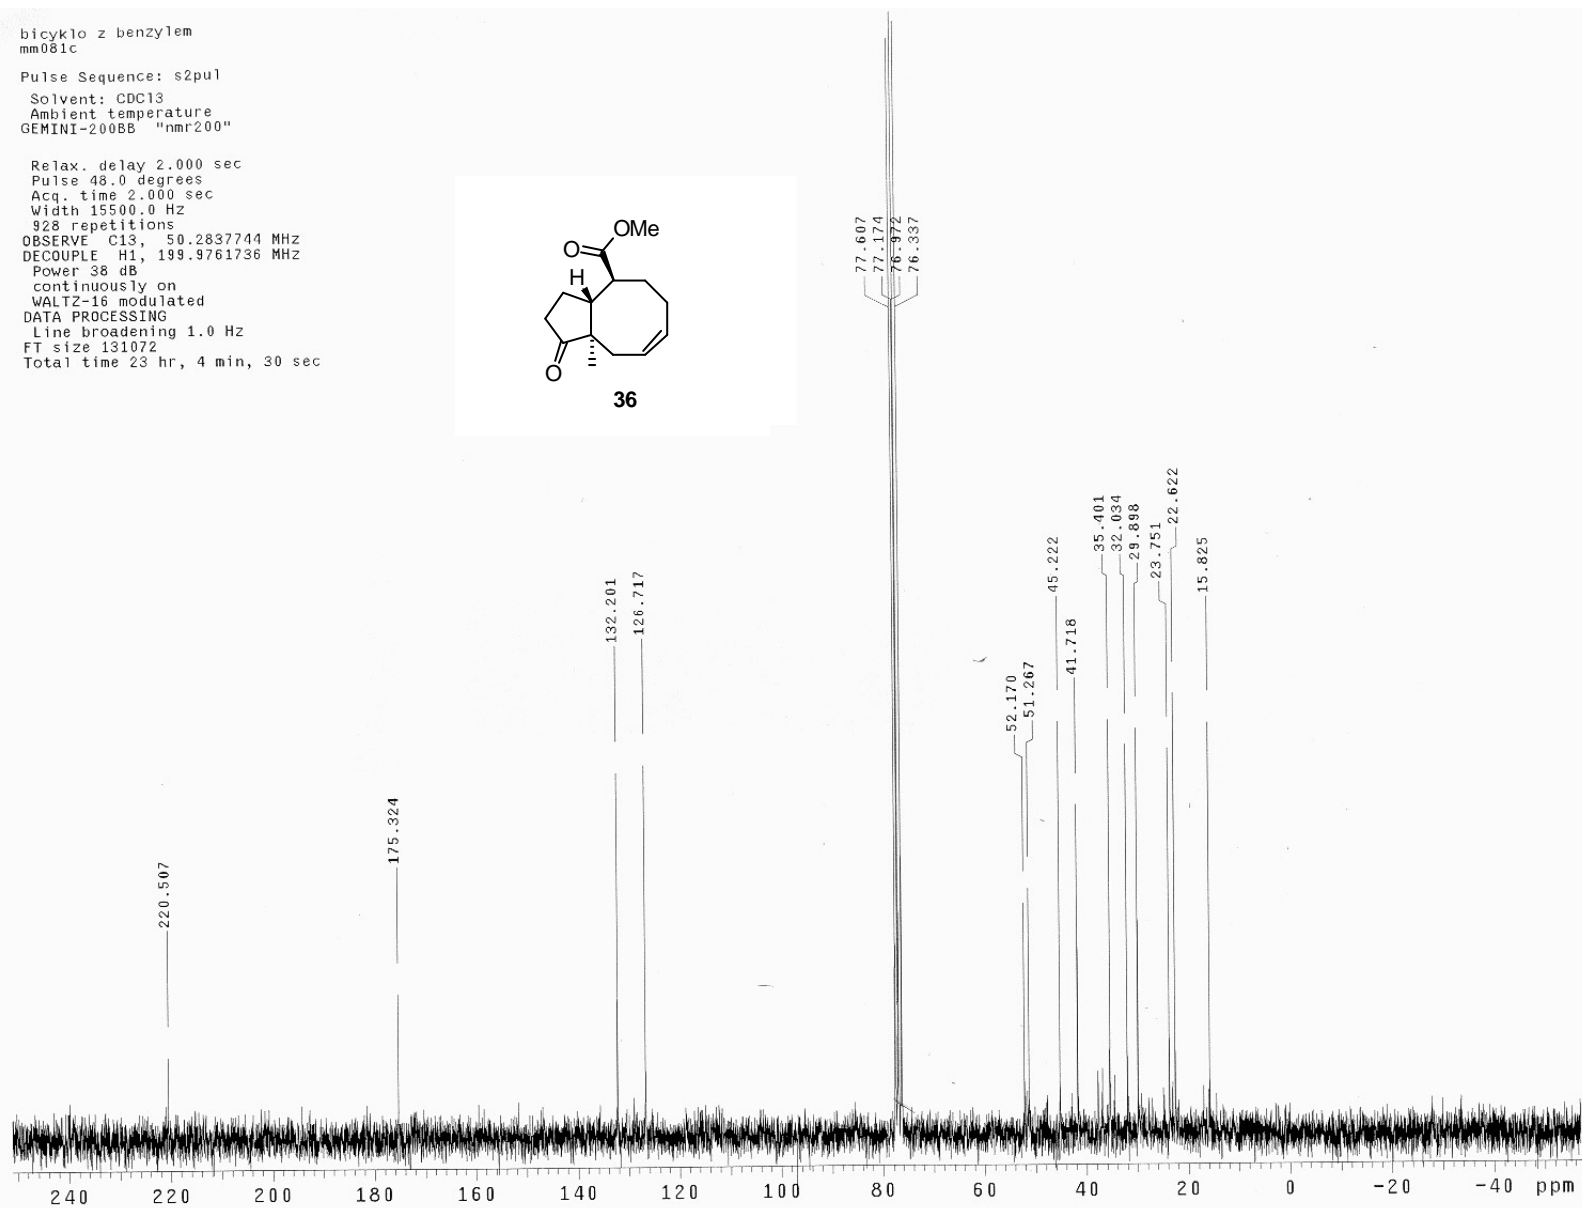

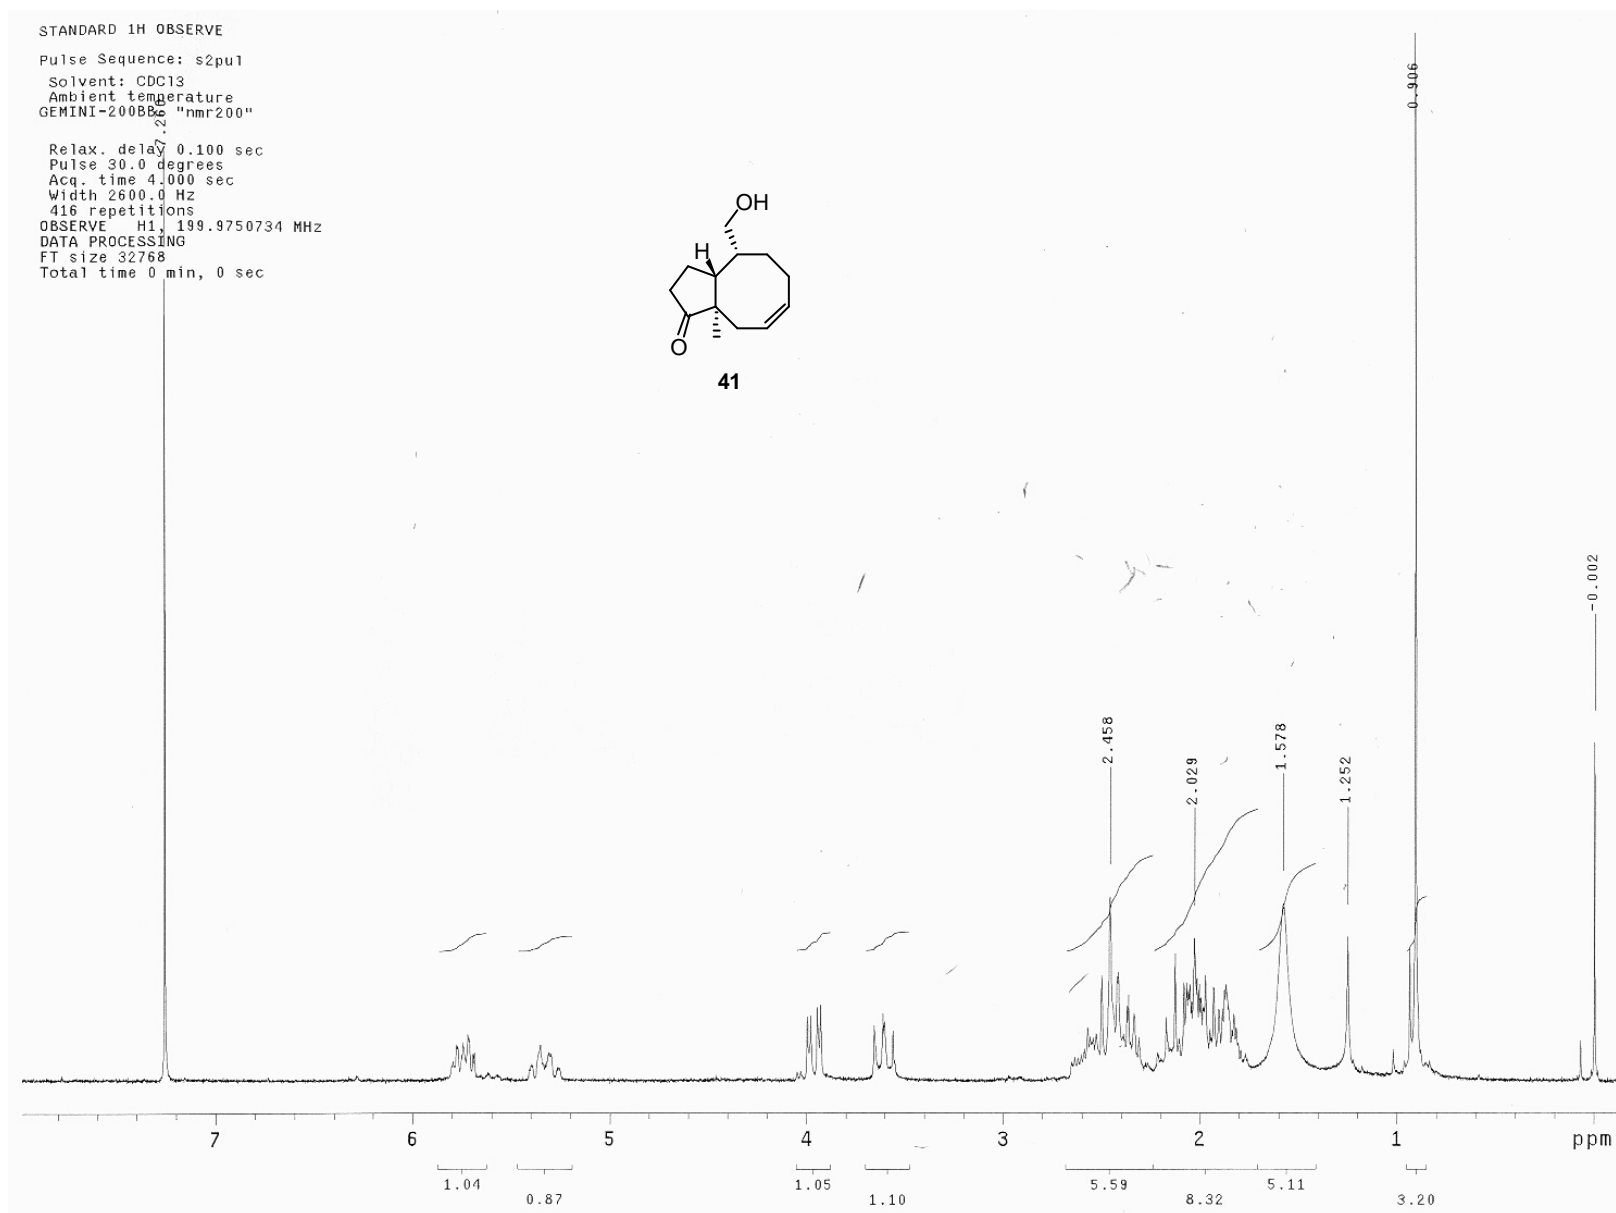

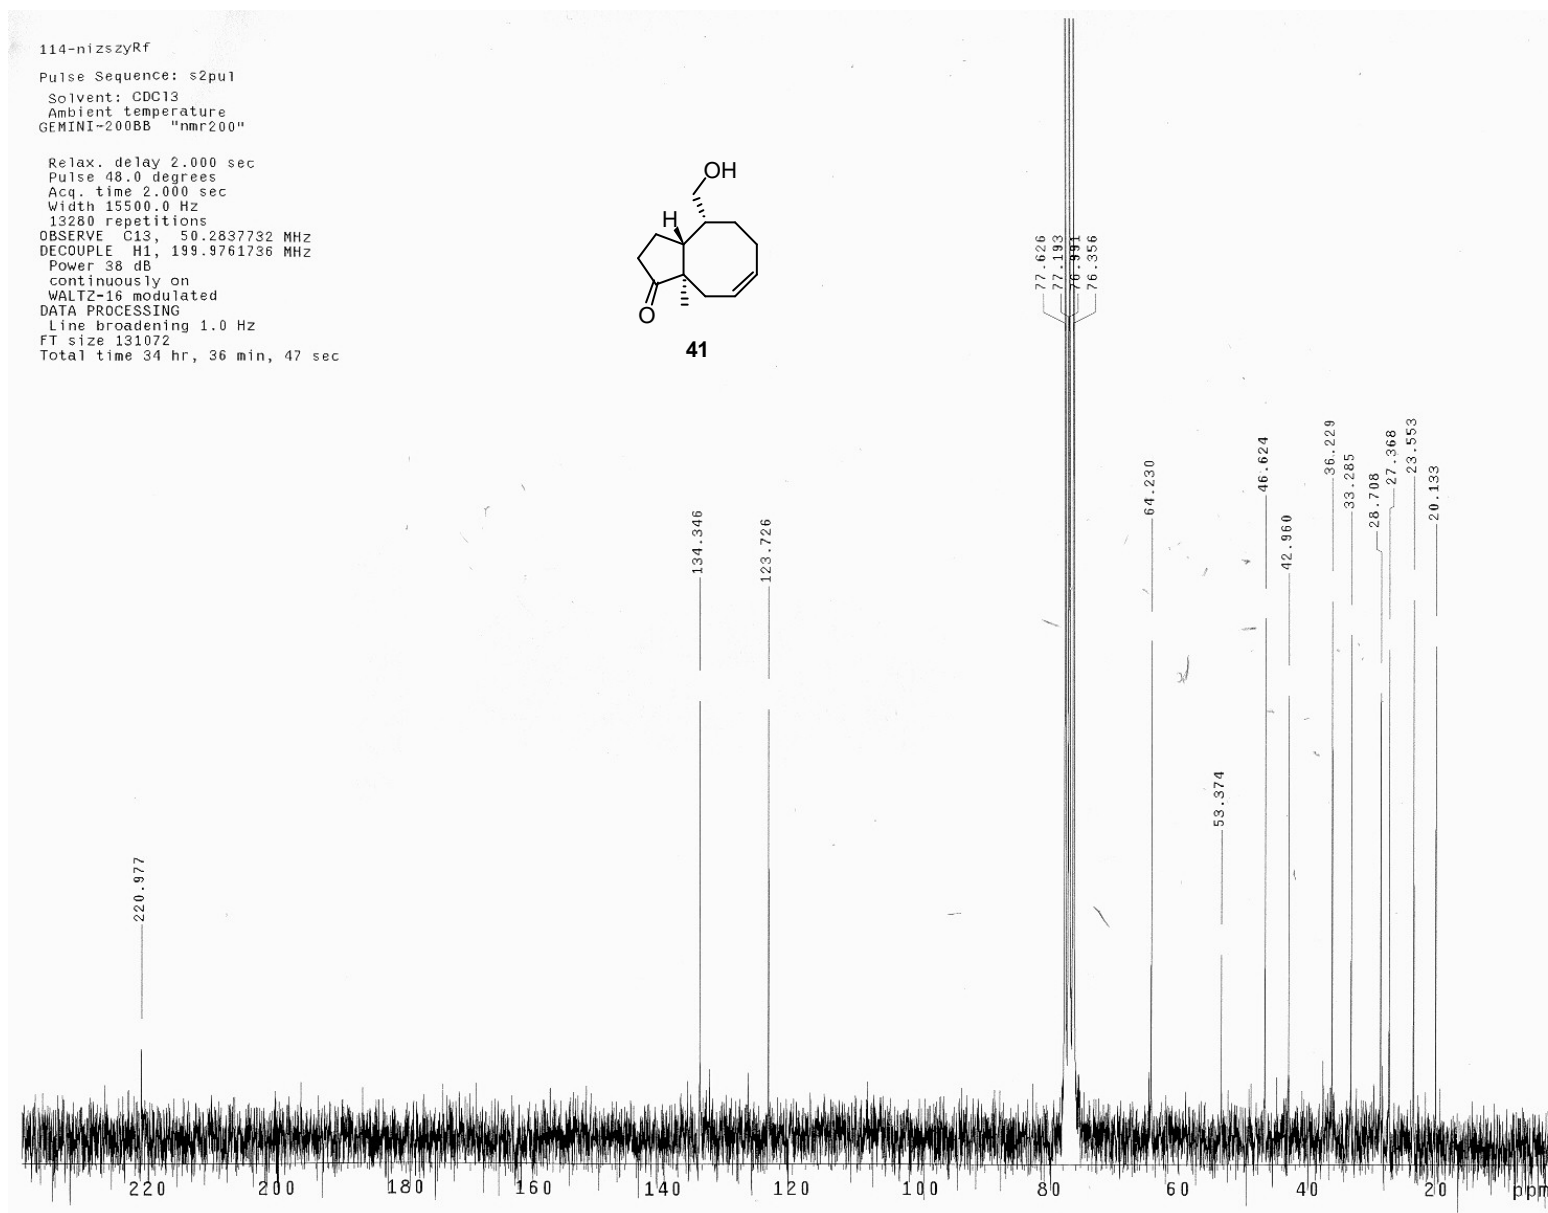

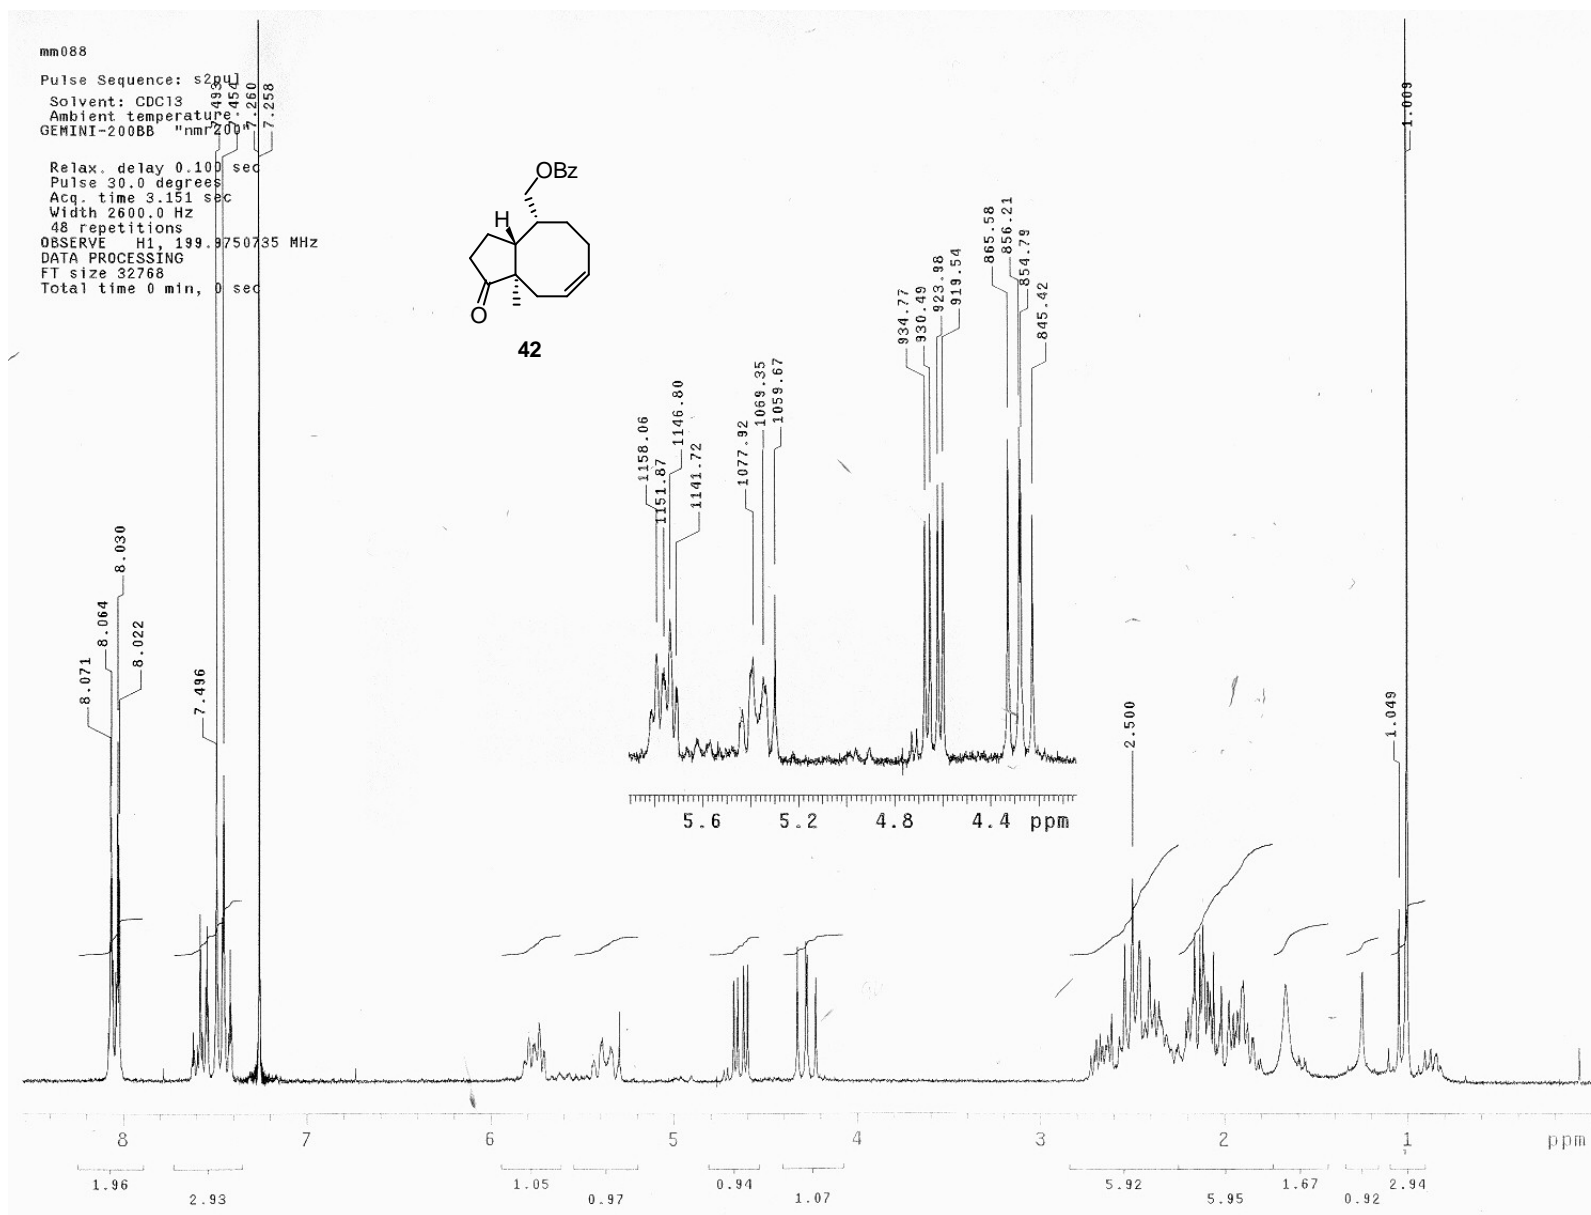

bicyklo z benzylem  
Pulse Sequence: s2pu1  
Solvent: CDCl3  
Ambient temperature  
GEMINI-200BB "nmr200"  
  
Relax. delay 2.000 sec  
Pulse 48.0 degrees  
Acq. time 2.000 sec  
Width 15500.0 Hz  
10000 repetitions  
OBSERVE C13, 50.2837725 MHz  
DECOUPLE H1, 199.9761736 MHz  
Power 38 dB  
continuously on  
WALTZ-16 modulated  
DATA PROCESSING  
Line broadening 1.0 Hz  
FT size 131072  
Total time 11 hr, 32 min, 17 sec

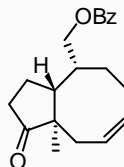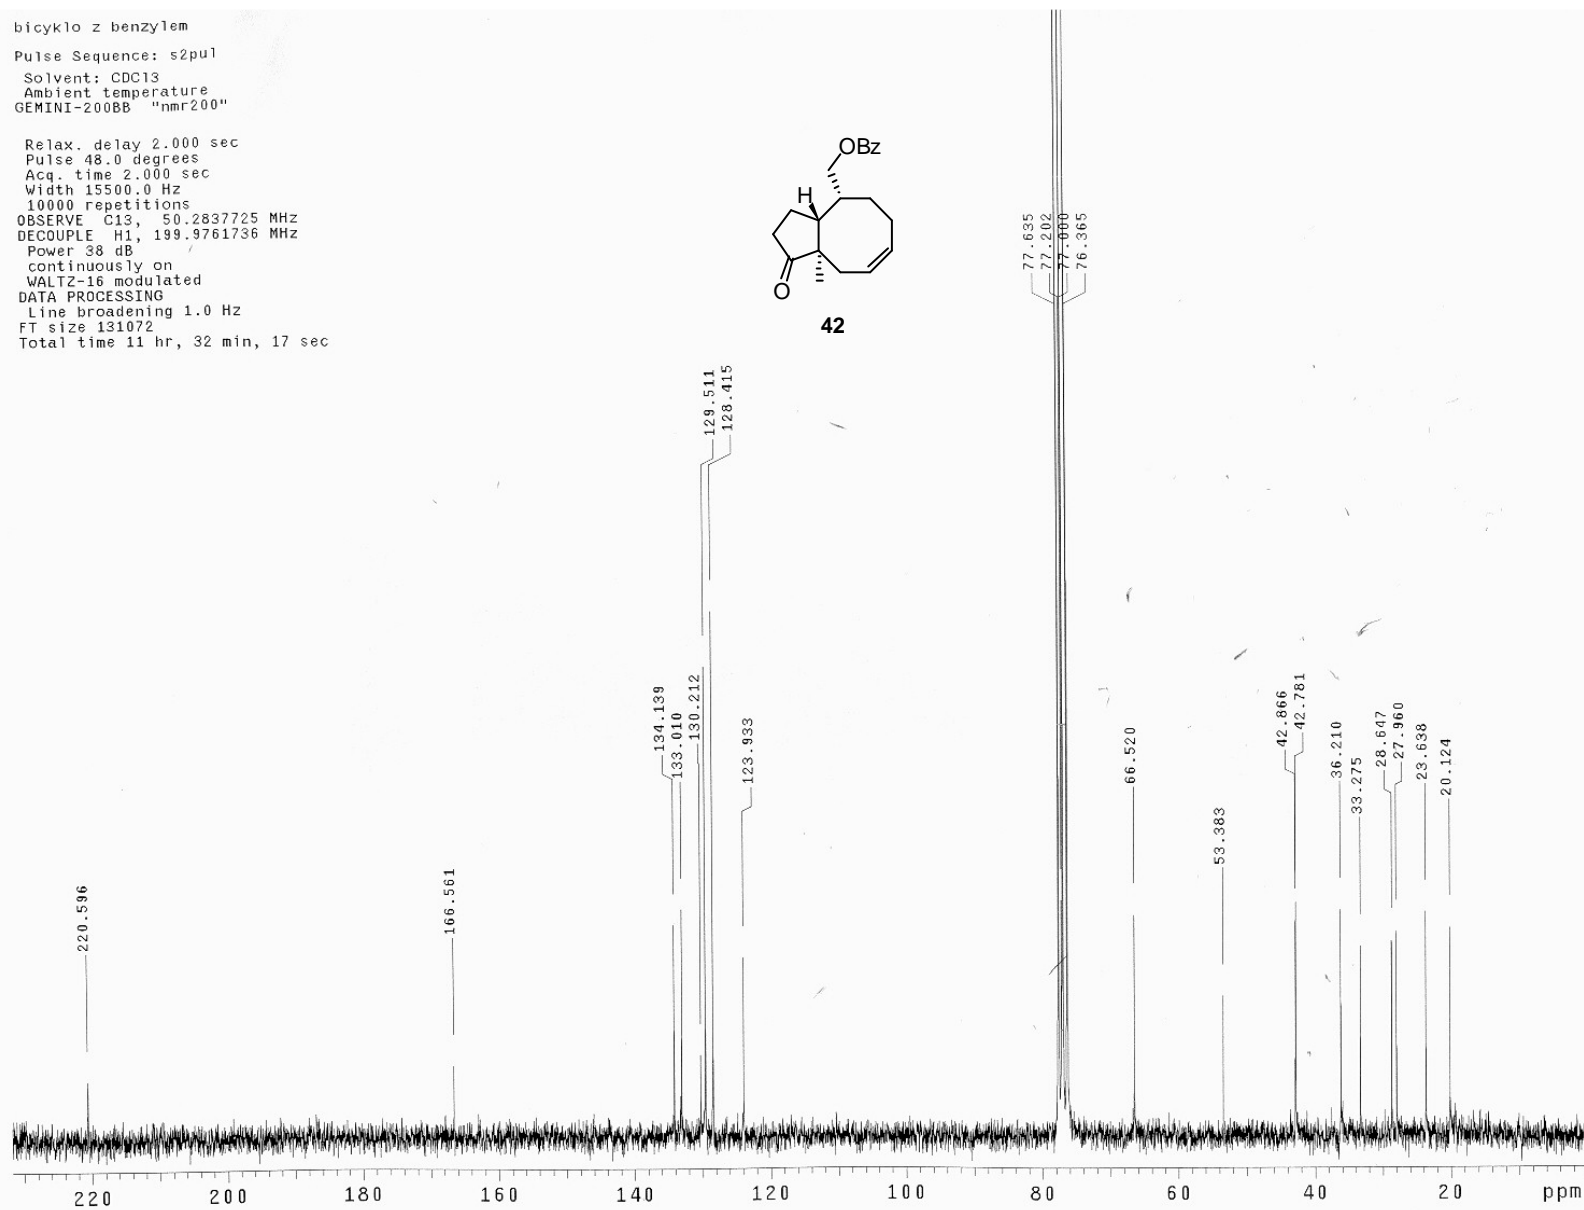

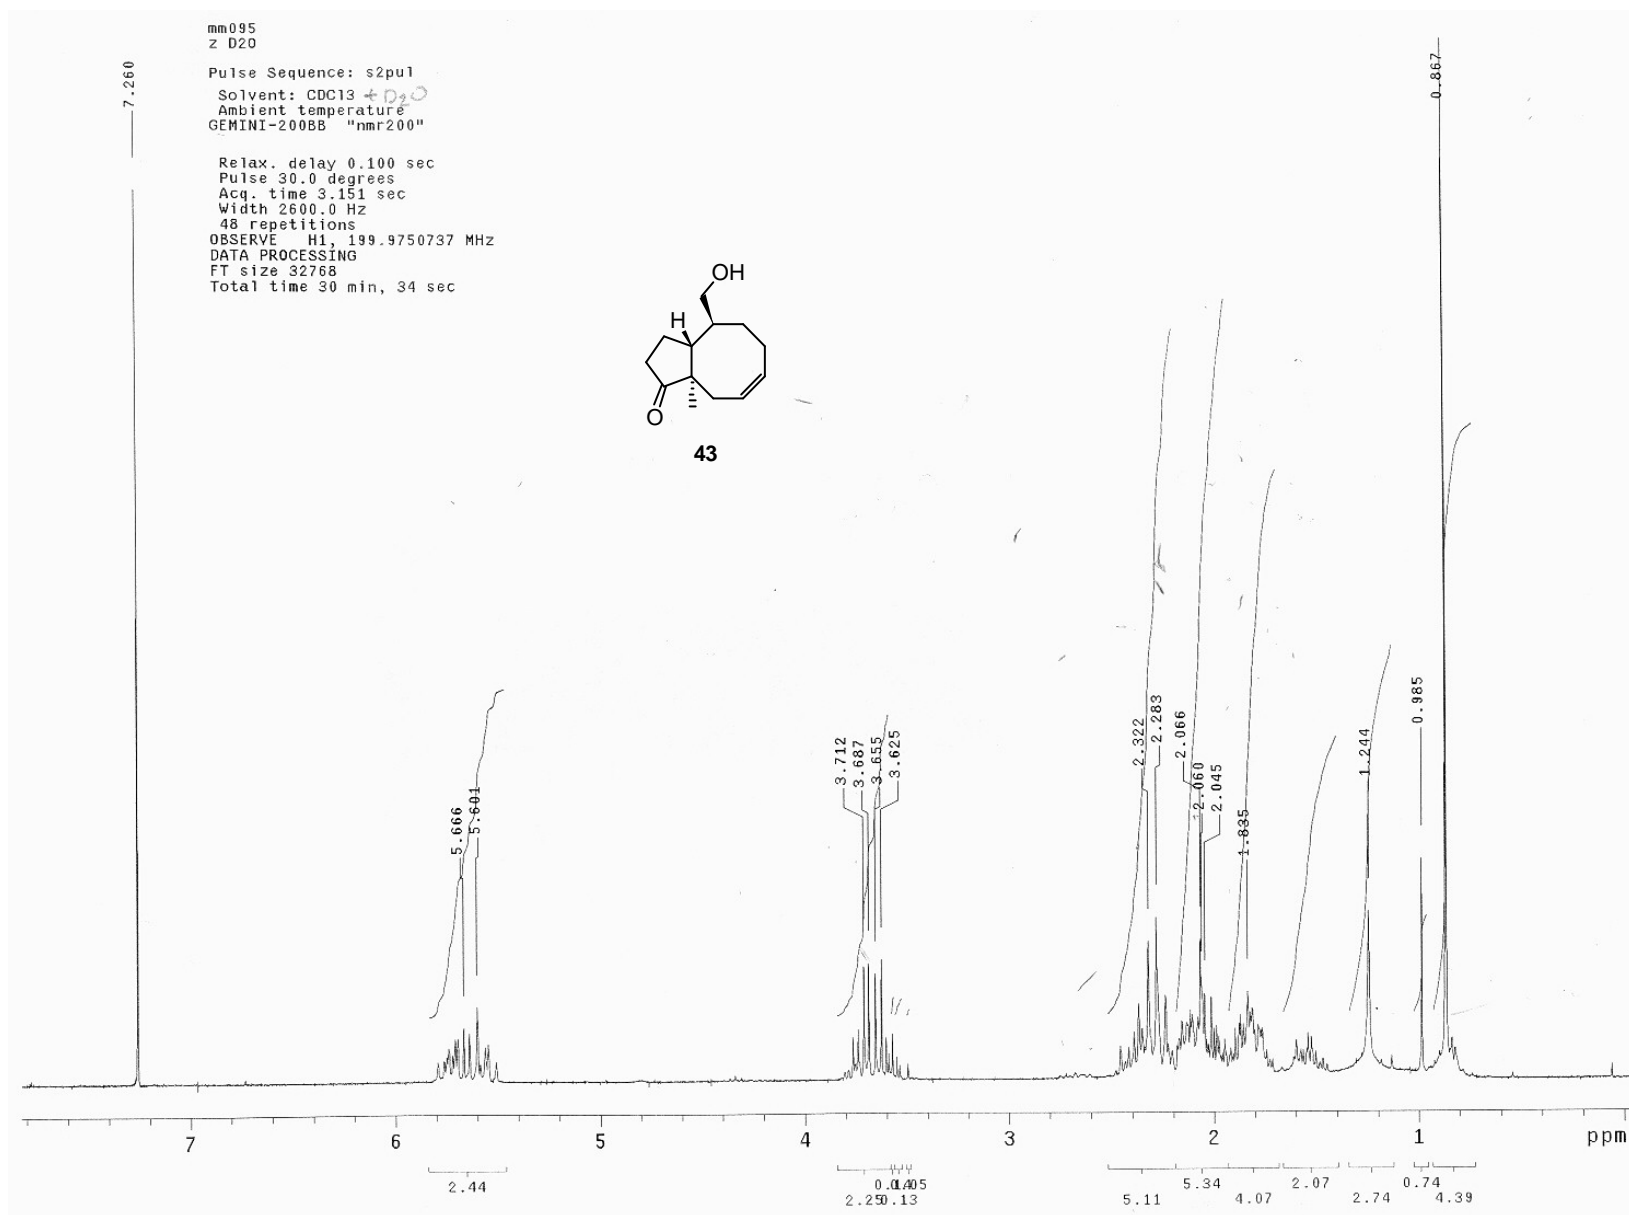



mm094

Pulse Sequence: s2pu1  
Solvent: CDC13  
Ambient temperature  
GEMINI-200BB "nmr200"

Relax. delay 2.000 sec  
Pulse 48.0 degrees  
Acq. time 2.000 sec  
Width 14500.0 Hz  
800 repetitions  
OBSERVE C13, 50.2837745 MHz  
DECOUPLE H1, 199.9761736 MHz  
Power 38 dB  
continuously on  
WALTZ-16 modulated  
DATA PROCESSING  
Line broadening 1.0 Hz  
FT size 131072  
Total time 11 hr, 31 min, 2 sec

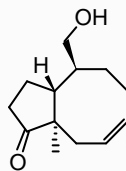

43

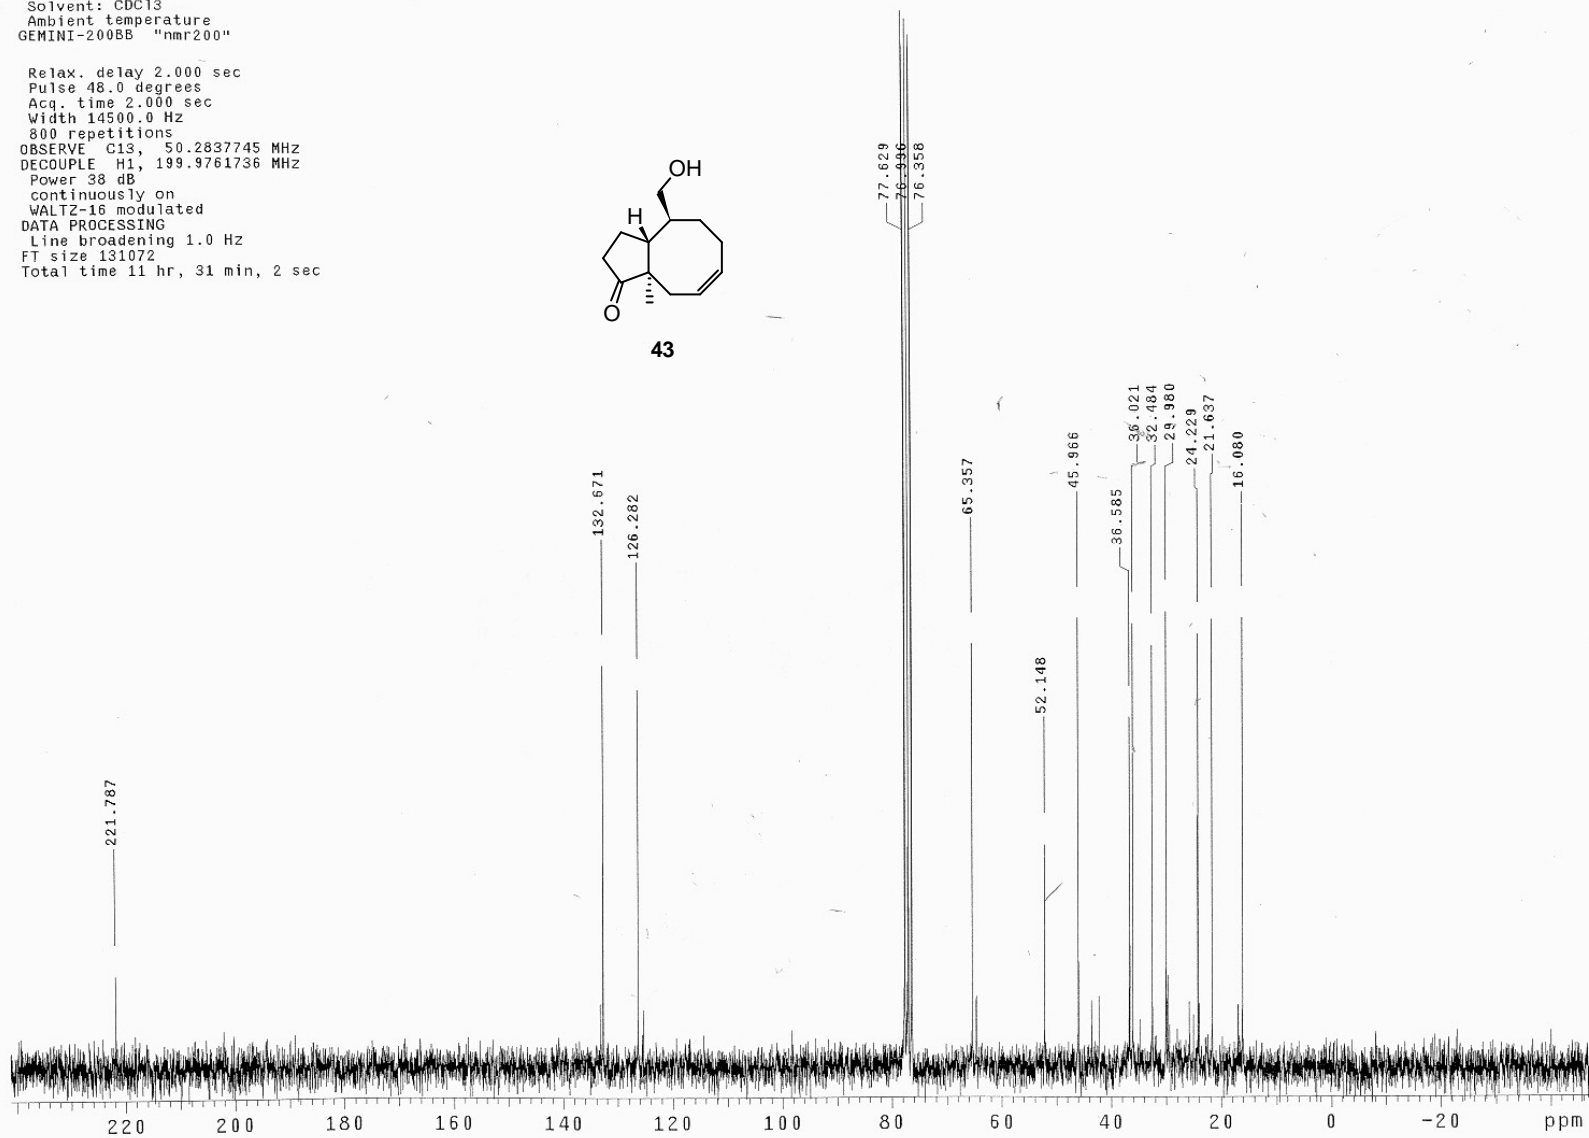

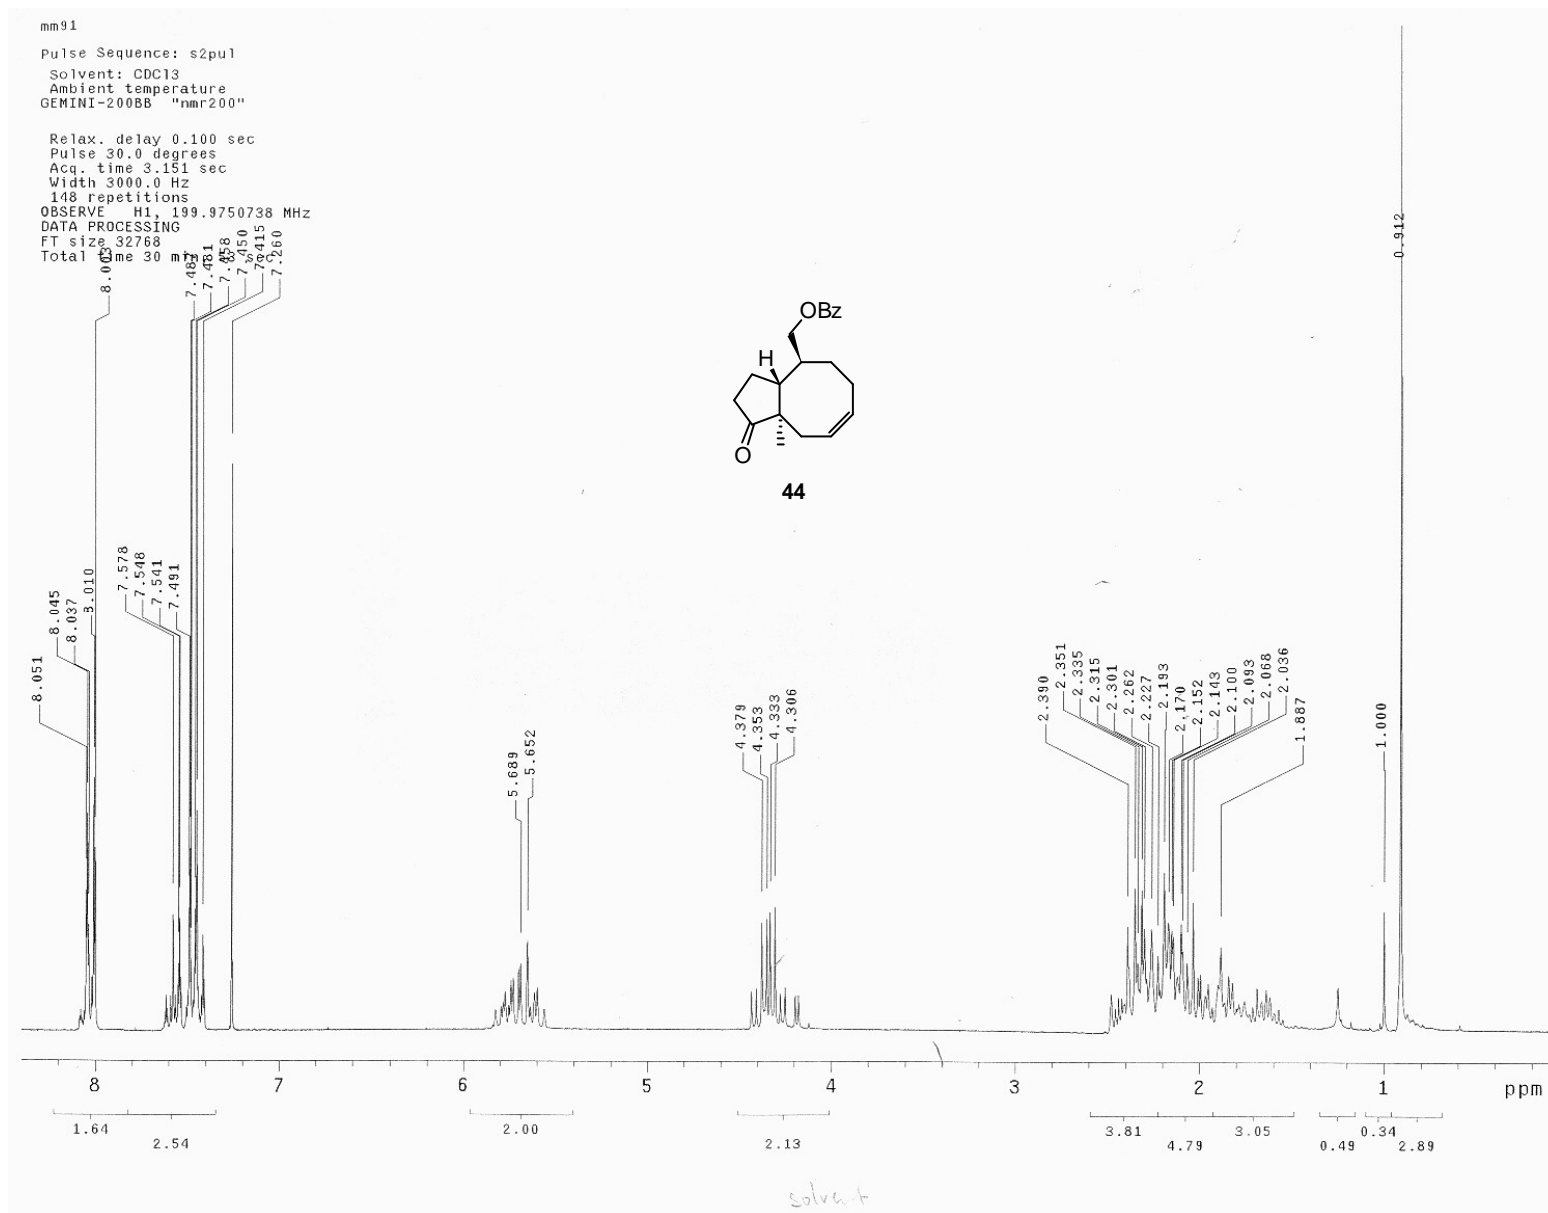

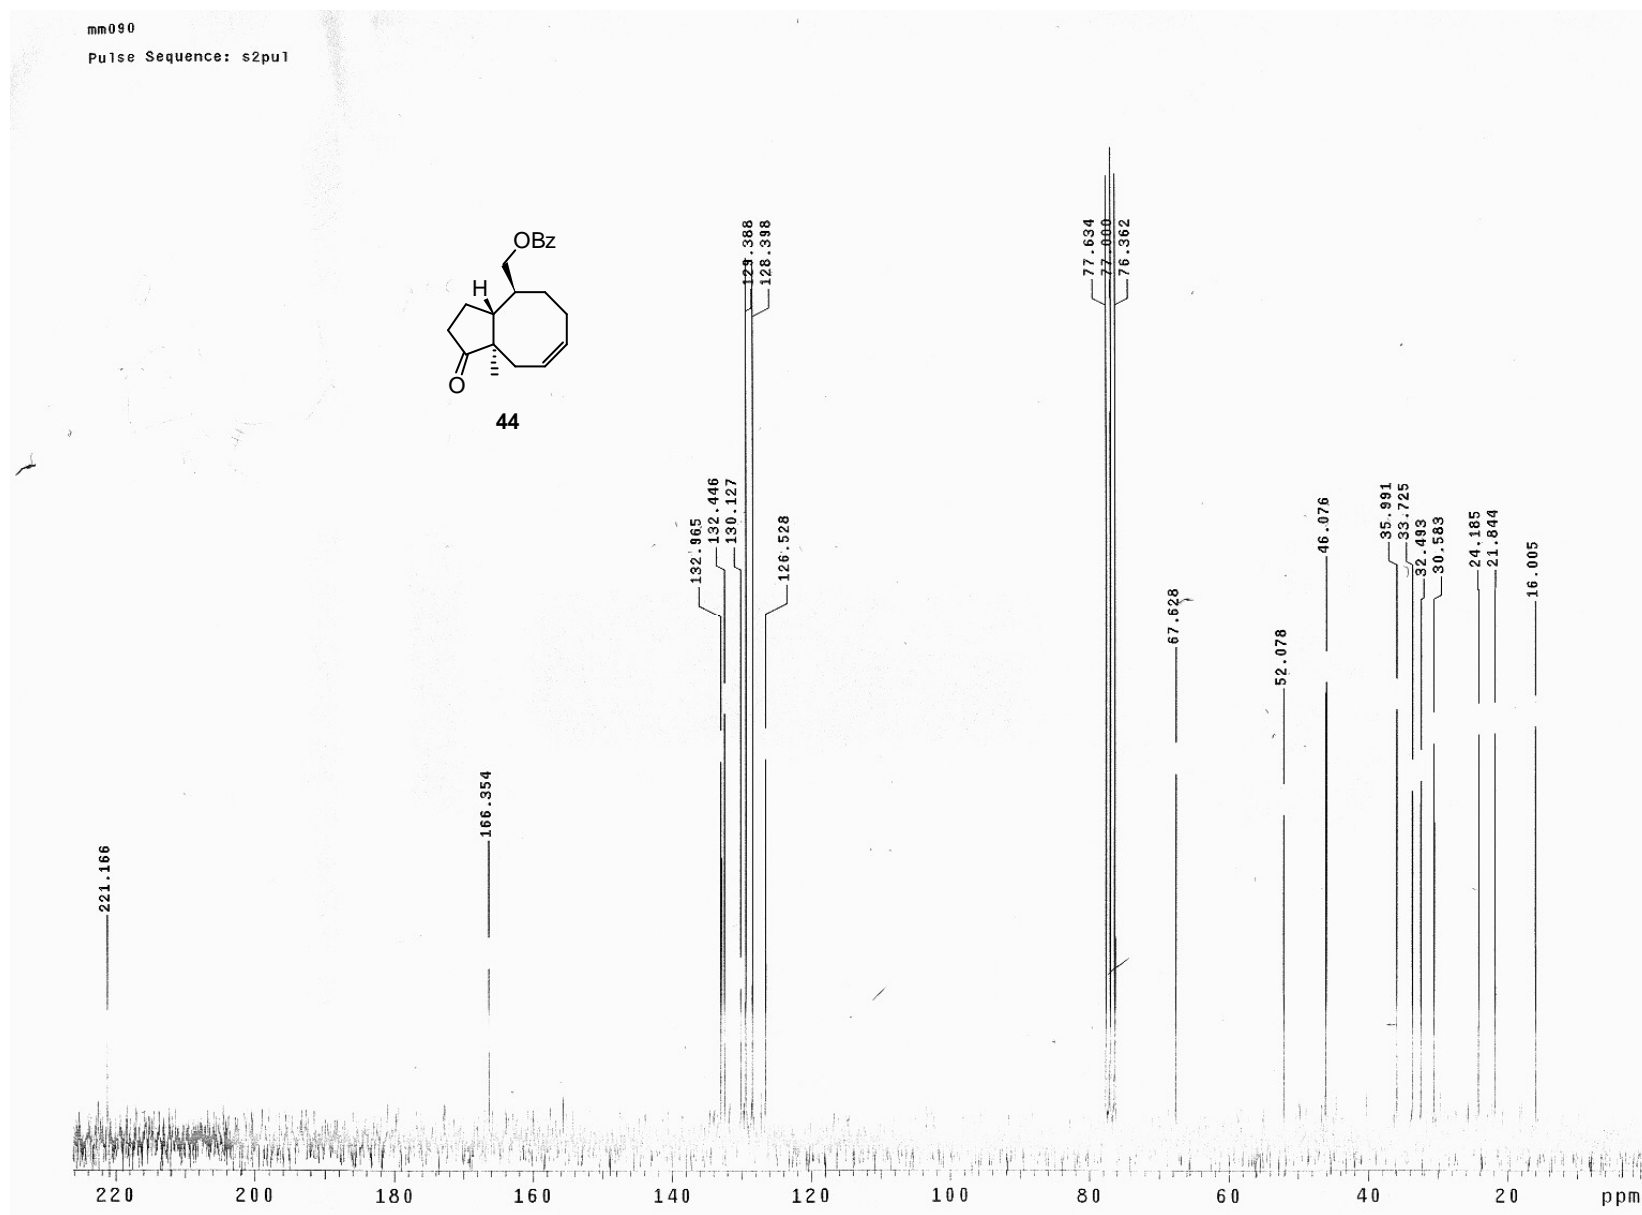

STANDARD 1H OBSERVE  
Pulse Sequence: s2pu1  
Solvent: CDCl3  
Ambient temperature  
GEMINI-2008B "nmr200"  
Relax. delay 0.100 sec  
Pulse 56.2 degrees  
Acq. time 4.000 sec  
Width 2591.2 Hz  
12 repetitions  
OBSERVE H1, 199.9710977 MHz  
DATA PROCESSING  
FT size 32768  
Total time 38 min, 23 sec

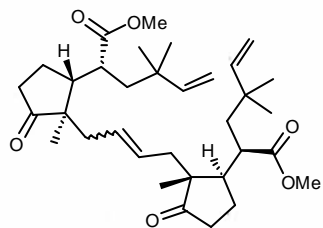

dimer of 28

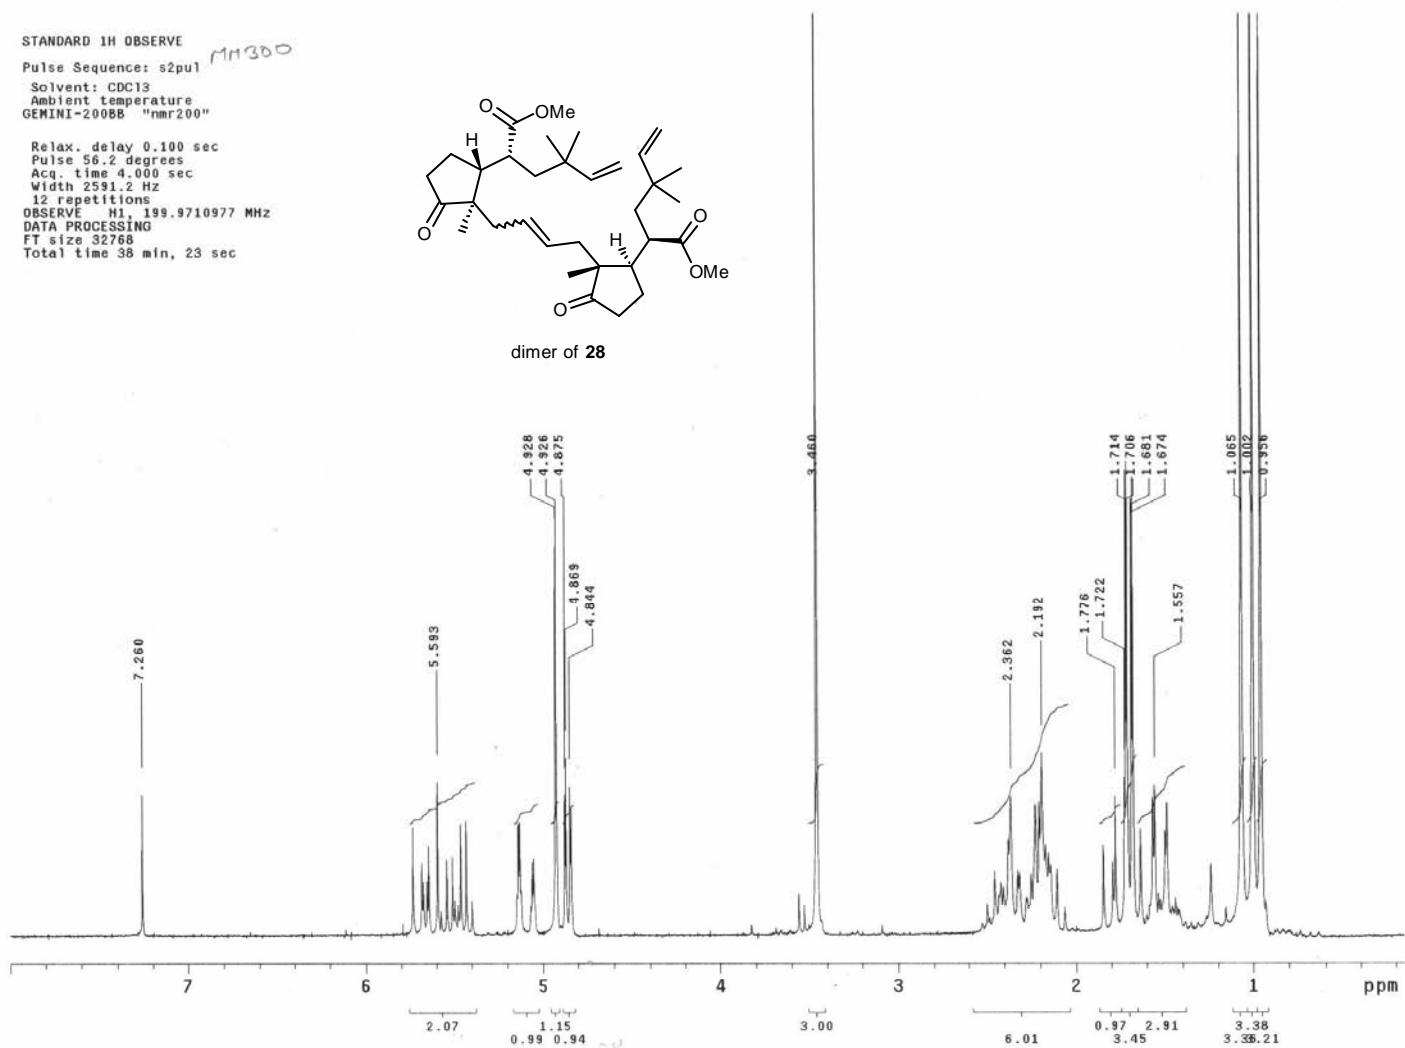

bromekcitronelal

Pulse Sequence: s2pu1

Solvent: CDC13  
Ambient temperature  
GEMINI-200BB "nmr200"

Relax. delay 2.000 sec  
Pulse 48.0 degrees  
Acq. time 2.000 sec  
Width 15500.0 Hz  
9872 repetitions  
OBSERVE C13, 50.2837730 MHz  
DECOUPLE H1, 199.9761736 MHz  
Power 38 dB  
continuously on  
WALTZ-16 modulated  
DATA PROCESSING  
Line broadening 1.0 Hz  
FT size 131072  
Total time 118 hr, 45 min, 39 sec

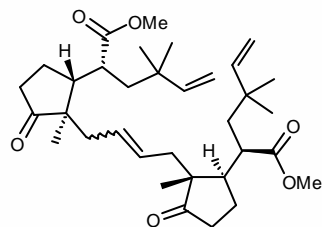

dimer of 28

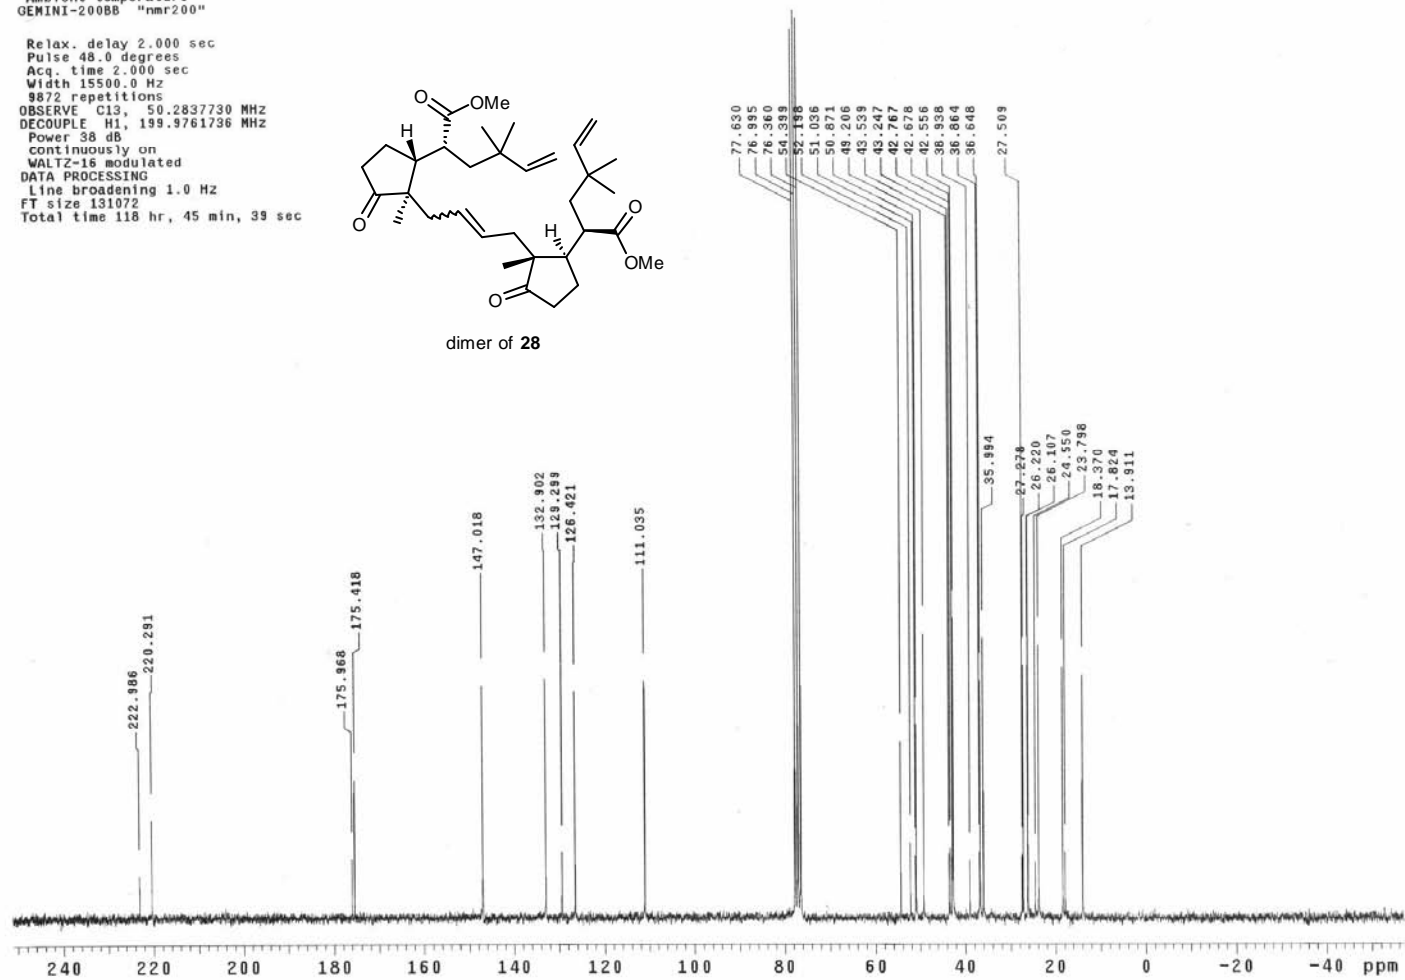

STANDARD 1H OBSERVE

Pulse Sequence: s2pu1

Solvent: CDCl3

Ambient temperature  
GEMINI-200BB "nmr200"

Relax. delay 0.100 sec  
Pulse 56.2 degrees  
Acq. time 4.000 sec  
Width 2800.0 Hz  
28 repetitions  
OBSERVE H1, 199.9710822 MHz  
DATA PROCESSING  
FT size 32768

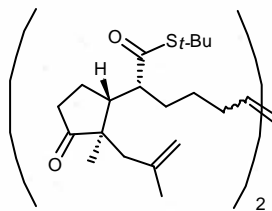

dimer of 12

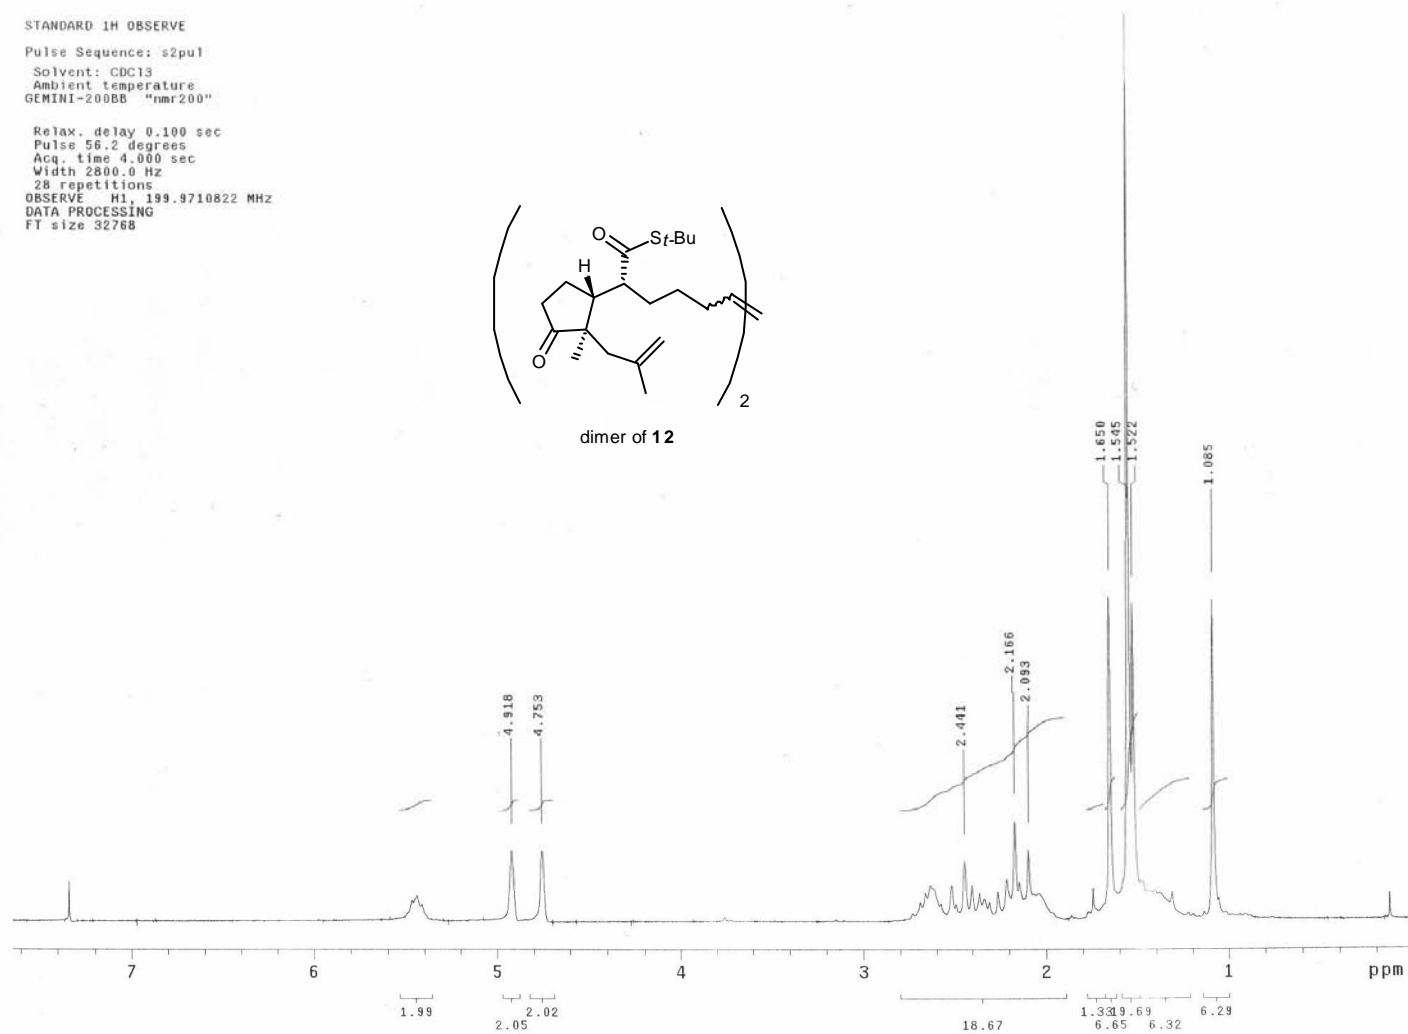

<sup>13</sup>C OBSERVE

Pulse Sequence: s2pul  
Solvent: CDCl<sub>3</sub>  
Ambient temperature  
GEMINI-200BB "nmr200"

Relax. delay 2.000 sec  
Pulse 45.0 degrees  
Acq. time 1.499 sec  
Width 14500.0 Hz  
320 repetitions  
OBSERVE C13, 50.2827746 MHz  
DECOUPLE H1, 199.9717975 MHz  
Power 38 dB  
continuously on  
WALTZ-16 modulated  
DATA PROCESSING  
Line broadening 1.0 Hz  
FT size 65536

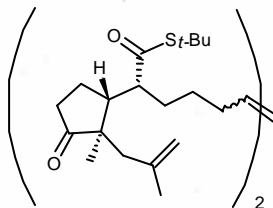

dimer of 12

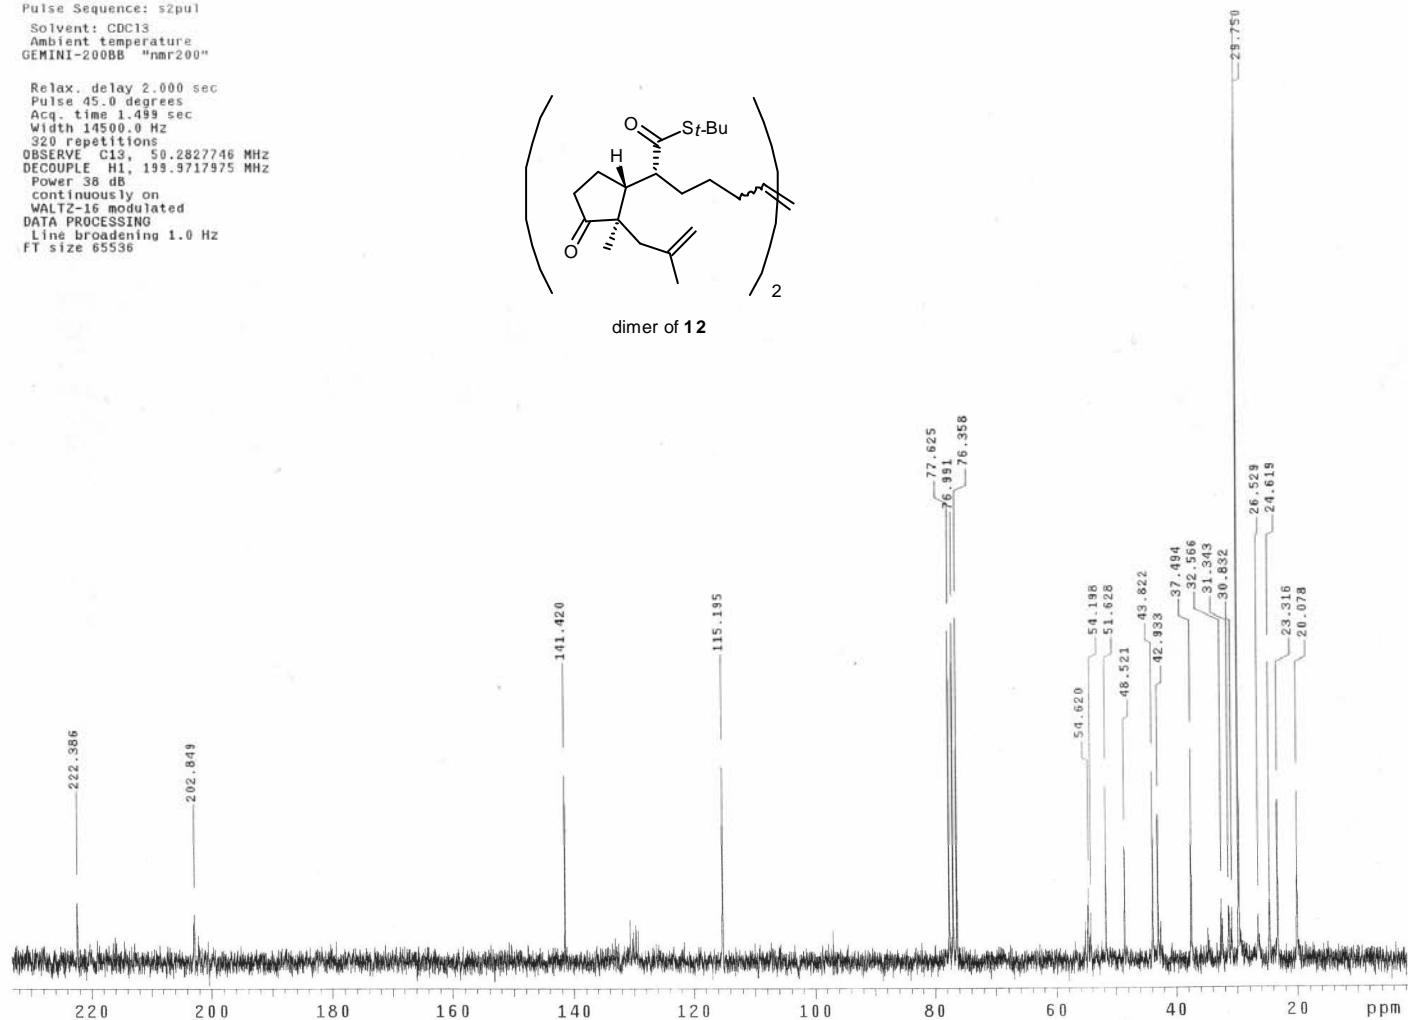

Supplement: c1ob05086a-2.pdf [file c1ob05086a-2.pdf]
