# Supplementary material for: Application of a metathesis reaction in the synthesis of sterically congested medium-sized rings. A direct ring closing versus a double bond migration–ring closing process
Source: Royal Society of Chemistry journal article supplement (doi:10.1039/c1ob05086a), 2011-01-01
Supplement: c1ob05086a-1.pdf [file c1ob05086a-1.pdf]

*Supporting Information*

*for:*

**Application of metathesis reaction in the synthesis of sterically congested medium-sized rings. A direct ring closing versus a double bond migration – ring closing process.**

**Jerzy Wicha,\*<sup>a</sup> and Michał Michalak<sup>a</sup>**

<sup>a</sup> *Institute of Organic Chemistry of the Polish Academy of Sciences*

*Kasprzaka, 44/52, 01-224 Warsaw, Poland*

*Fax: 48 22 632 6681*

*E-mail: jwicha@icho.edu.pl.*

|                                     |            |
|-------------------------------------|------------|
| <b>1. General Information.....</b>  | <b>S1</b>  |
| <b>2. Metathesis reactions.....</b> | <b>S2</b>  |
| <b>3. Syntheses of dienes.....</b>  | <b>S10</b> |
| <b>4. References.....</b>           | <b>S26</b> |

**General Information**

Melting points were determined on a hot-stage apparatus and are uncorrected. NMR spectra were recorded for CDCl<sub>3</sub> solutions at 200 MHz (<sup>1</sup>H) or 50 MHz (<sup>13</sup>C) with Varian Gemini instrument or at 500 MHz (<sup>1</sup>H) with Bruker AMX apparatus. Chemical shifts are reported in δ units, referenced for CDCl<sub>3</sub> (7.26 ppm for <sup>1</sup>H and 77.0 ppm for <sup>13</sup>C). High resolution mass spectra (HRMS) were taken using AMD – 604 unit, electron ionisation (EI) at 70 eV or liquid secondary ion mass spectroscopy (LSIMS), or electrospray ionisation (ESI). HPLC analyses were performed using a Shimadzu LC-8A chromatograph provided with an analytical column (25/0.46 cm), Nucleosil 50/5 μm, or RP18 –Hypersil ODS 5 μm column, Besta Technik GmbH and a variable UV SPD – 6A detector, at 254 nm; a flow rate 1 mL/min. TLC was performed on aluminium sheets, Merck 60F 254. Merck silica gel, 230-400 mesh was used for flash column chromatography in a ratio 30 g per 1 g of organic material, if otherwise not indicated. Deactivated silica gel was prepared by pre-washing of a column with hexane

containing 2% of Et<sub>3</sub>N (ca. 50 mL per 10 g of silica gel). Metathesis reactions and all air and/or moisture - sensitive reactions were performed in a flame-dried glassware under a positive pressure of argon, using anhydrous solvents. Benzene was distilled from Na-K alloy. Dichloromethane (DCM) and dichloroethylene were distilled over CaH<sub>2</sub>. Triethylamine and pyridine were distilled over CaH<sub>2</sub> and stored over potassium hydroxide. Diisopropylamine was distilled over CaH<sub>2</sub> and stored over 4 Å molecular sieves. Commercially available mixtures of hexanes were redistilled before the use. *n*-Butyllithium was purchased from Aldrich and standardized by titration with 1,10-phenanthroline. Trimethylsilyl triflate was purchased from Aldrich and distilled prior to use. Tris(dibenzylideneacetone)dipalladium, palladium(II) acetate, 1,2-bis-(diphenylphosphino)-ethane and 1,4-bis-(diphenylphosphino)-butane and Grubbs' catalysts were purchased from Aldrich. Organic solutions were dried over anhydrous MgSO<sub>4</sub> and solvents were evaporated using rotary evaporator.

### Metathesis reactions

**General procedure I:** A solution of diene in a chosen solvent, DCM, benzene or ethylene chloride (a half of the total volume needed for the final concentration, 0.01 M) was added to a stirred under argon solution of a Grubbs' catalyst (3-10 mol%) in the same solvent (half of the total volume). The mixture was heated at reflux temperature, under argon, until the starting material was consumed (by TLC analysis). After cooling, the solvent was evaporated (a rotary evaporator) and the residue was chromatographed on silica gel using an appropriate eluting system.

**General procedure II:** A solution of diene in a chosen solvent (a half of the total volume needed for the final concentration, 0.01 M) was added to a solution of Grubbs' catalyst **7** (5 mol%) and ruthenium hydride **9** (1-5 mol%) in the same solvent (a half of the total volume). The mixture was heated at reflux temperature, under argon, until starting material was consumed (by TLC analysis). Then the solvent was evaporated and the residue was chromatographed on silica gel using an appropriate eluting system.

### ***S*-tert-Butyl (3aR\*,4R\*,8aR\*)-7,8a-dimethyl-1-oxo-1,2,3,3a,4,5,8,8a-octahydroazulene-4-carbothioate (5)**

a. Procedure I, using diene **3** (102.3 mg, 0.30 mmol), catalyst **7** (12.9 mg, 0.015 mmol) and DCE (30 mL); reaction time, 72 h; silica gel (0.5 g, 5% EtOAc/hexanes); product **5** (60.0 mg, 67% yield).

b. Procedure II, using diene **3** (69.9 mg, 0.208 mmol), catalyst **7** (8.8 mg, 0.010 mmol), ruthenium hydride **9** (11.9 mg, 0.010 mmol) and benzene (21 mL); reaction time, 6 h; silica gel (0.5 g, 5% EtOAc/hexanes); product **5** (61.2 mg, 100%).

c. Procedure I, using diene **10** (60.5 mg, 0.180 mmol), catalyst **7** (7.6 mg, 0.009 mmol) and benzene (18 mL); reaction time, 2 h; silica gel (5.0 g, 5% EtOAc/hexanes); product **5** (51.7 mg, 98% yield): <sup>1</sup>H NMR (200 MHz): 5.69 (br t, *J*=6.0 Hz, =CH, 1H), 2.95-2.85 [m, CHCOSC(CH<sub>3</sub>)<sub>3</sub>, 1H], 2.65-1.90 (m, 9H), 1.78 (s, C7-CH<sub>3</sub>, 3H), 1.44 [s, COSC(CH<sub>3</sub>)<sub>3</sub>, 9H], 0.86 (s, C8a-CH<sub>3</sub>, 3H) <sup>13</sup>C NMR (50 MHz): 222.8 (C=O), 201.5 [COSC(CH<sub>3</sub>)<sub>3</sub>], 136.9 (CH=C), 123.4 (CH=C), 53.1, 52.8, 49.0, 48.0, 40.2, 35.4, 29.9, 29.6, 27.4, 24.0, 15.6. HRMS calc. for C<sub>17</sub>H<sub>26</sub>O<sub>2</sub>S: 294.1653; found: 294.1651.

d. Procedure I, using diene **12** (71.5 mg, 0.204 mmol), catalyst **7** (8.7 mg, 0.010 mmol) and benzene (20.4 mL); reaction time, 72 h; silica gel (5.0 g, 5% EtOAc/hexanes); products: **5** (10.2 mg, 17% yield) and dimers of **12** (45.3 mg, 66%). Dimers of diene **12**: <sup>1</sup>H NMR (200 MHz): 5.52-5.32 (m, =CH, 2H), 4.92 (br s, =CH<sub>2</sub>, 2H), 4.75 (br s, =CH<sub>2</sub>, 2H), 2.78-1.95 (m, 18H), 1.78-1.20 (m, 10H) overlapping 1.65 (s, CH<sub>3</sub>C=CH<sub>2</sub>, 6H) and 1.55 [s, COSC(CH<sub>3</sub>)<sub>3</sub>, 18H], 1.09 (s, C2CH<sub>3</sub>, 6H); <sup>13</sup>C NMR (50 MHz): 222.4 (C=O), 202.9 [COSC(CH<sub>3</sub>)<sub>3</sub>], 141.4 [C(CH<sub>3</sub>)=CH<sub>2</sub>], 115.2 (=CH), 54.6, 54.2, 51.6, 48.5, 43.8, 42.9, 37.5, 32.6, 31.3, 30.8, 29.8 [COSC(CH<sub>3</sub>)<sub>3</sub>], 26.5, 24.6, 23.3, 20.1. HRMS (EI) calc. for C<sub>40</sub>H<sub>64</sub>O<sub>4</sub>S<sub>2</sub>: 672.4246; found: 672.4235.

e. Procedure II, using diene **12** (64.6 mg, 0.185 mmol), catalyst **7** (7.8 mg, 0.009 mmol), ruthenium hydride **9** (8.8 mg, 0.009 mmol) and benzene (18.5 mL); reaction time, 24 h; silica gel (5.0 g, 5% EtOAc/hexanes); products **5** (34.7 mg, 64%) and dimers of **12** (18.6 mg, 30%). Dimers of **12**: <sup>1</sup>H NMR (200 MHz): 5.52-5.32 (m, =CH, 2H), 4.92 (br s, =CH<sub>2</sub>, 2H), 4.75 (br s, =CH<sub>2</sub>, 2H), 2.78-1.95 (m, 18H), 1.78-1.20 (m, 10H) overlapping 1.65 (s, CH<sub>3</sub>C=CH<sub>2</sub>, 6H) and 1.55 [s, COSC(CH<sub>3</sub>)<sub>3</sub>, 18H], 1.09 (s, C2CH<sub>3</sub>, 6H); <sup>13</sup>C NMR (50 MHz): 222.4 (C=O), 202.9 [COSC(CH<sub>3</sub>)<sub>3</sub>], 141.4 [C(CH<sub>3</sub>)=CH<sub>2</sub>], 115.2 (=CH), 54.6, 54.2, 51.6, 48.5, 43.8, 42.9, 37.5, 32.6, 31.3, 30.8, 29.8 [COSC(CH<sub>3</sub>)<sub>3</sub>], 26.5, 24.6, 23.3, 20.1. HRMS (EI) calc. for C<sub>40</sub>H<sub>64</sub>O<sub>4</sub>S<sub>2</sub>: 672.4246; found: 672.4235.

***S*-tert-Butyl (3a*R*\*,4*R*\*,8a*R*\*)-7,8a-dimethyl-1-oxo-1,2,3,3a,4,5,8,8a-octahydroazulene-4-carbothioate (5) and *S*-tert-butyl (3a*R*\*,4*R*\*,9a*R*\*)-8,9a-dimethyl-1-oxo-2,3,3a,4,5,6,9,9a-octahydro-1*H*-cyclopenta[8]annulen-4-carbothioate (4)**

a. Procedure I, using thioester **11** (100.0 mg, 0.286 mmol), catalyst **7** (12.1 mg, 0.014 mmol, 5 mol%) and benzene (28.6 mL); reaction time, 72 h; silica gel (10 g, 5% EtOAc/hexanes);

products: **5** (28.6 mg, 34%) and **4** (35.2 mg, 40%). Product **4**:  $^1\text{H}$  NMR (200 MHz): 5.46 (t,  $J=5.7$  Hz, =CH, 1H), 2.96-2.80 (m, 1H), 2.76-1.90 (m, 10H), 1.70-1.30 (m, 1H) overlapping 1.53 (s, C8-CH<sub>3</sub>, 3H) and 1.44 [s, COSC(CH<sub>3</sub>)<sub>3</sub>, 9H], 0.97 (s, C9a-CH<sub>3</sub>, 3H);  $^{13}\text{C}$  NMR (50 MHz): 221.0 (C=O), 202.6 [COSC(CH<sub>3</sub>)<sub>3</sub>], 133.0 (CH=C), 127.1 (CH=C), 56.2, 53.3, 48.1, 42.9, 37.8, 36.3, 29.6 [COSC(CH<sub>3</sub>)<sub>3</sub>], 28.0, 27.6, 26.4, 24.5, 19.0. HRMS calc. for C<sub>18</sub>H<sub>28</sub>O<sub>2</sub>S: 308.1810; found: 308.1816.

b. Procedure II, using diene **11** (78.4, 0.224 mmol), catalyst **7** (9.3 mg, 0.011 mmol, 5 mol%), ruthenium hydride **9** (10.6 mg, 0.011 mmol, 5 mol%) and benzene (22 mL); reaction time, 24 h; silica gel (10 g, 5% EtOAc/hexanes); product **5** (56.6 mg, 86%).

***S*-tert-Butyl (4aR\*,5R\*,9aR\*)-8,9a-dimethyl-1-oxo-2,3,4,4a,5,6,9,9a-octahydro-1H-benz[7]annulen-5-carbothioate (15)**

Procedure I, using diene **13** (68.9 mg, 0.197 mmol), catalyst **7** (8.4 mg, 0.001 mmol, 5 mol%) and benzene (20 mL); reaction time 16 h; silica gel (7.0 g, 7% EtOAc/hexanes); product **15** (34.6 mg, 57%):  $^1\text{H}$  NMR (200 MHz): 5.59-5.44 (m, =CH, 1H), 2.92-2.76 (m, 1H), 2.75-1.94 (m, 7H) overlapping 2.39 (s, CH<sub>2</sub>CCH<sub>3</sub>=CH, 2H), 1.92-1.08 (m, 3H) overlapping 1.75 (s, C8-CH<sub>3</sub>, 3H) and 1.44 [s, COSC(CH<sub>3</sub>)<sub>3</sub>, 9H] and 1.20 (s, C9a-CH<sub>3</sub>, 3H);  $^{13}\text{C}$  NMR (50 MHz): 214.5 (C=O), 201.2 [COSC(CH<sub>3</sub>)<sub>3</sub>], 139.1 [CCH<sub>3</sub>=CH], 121.9 [CCH<sub>3</sub>=CH], 55.3, 51.0, 50.3, 47.7, 38.7, 37.7, 29.8, 29.7, 27.7 [COSC(CH<sub>3</sub>)<sub>3</sub>], 26.3, 26.2, 19.2. HRMS calc. for C<sub>18</sub>H<sub>28</sub>O<sub>2</sub>S: 308.1810; found 308.1806.

***S*-tert-Butyl (3aS\*,4S\*,9aR\*)-8-methyl-1-oxo-2,3,3a,4,5,6,9,9a-octahydro-1H-cyclopenta[8]annulen-4-carbothioate (16)**

Procedure I, using thioester **14** (208.0 mg, 0.645 mmol), catalyst **7** (27.3 mg, 0.032 mmol) and benzene (65 mL); reaction time, 16 h; silica gel (20 g, 4% EtOAc/5% *tert*-BuOMe/hexane); product **16** (109.4 mg, 58%):  $^1\text{H}$  NMR (200 MHz): 5.41 (br t,  $J=7.2$  Hz, =CH, 1H), 2.85 (br t,  $J=4.3$  Hz, 1H), 2.76-1.82 (m, 10H), 1.76-1.30 (m, 2H) overlapping 1.57 (s, CH<sub>3</sub>, 3H) and 1.43 [s, COSC(CH<sub>3</sub>)<sub>3</sub>, 9H];  $^{13}\text{C}$  NMR (50 MHz): 218.9 (C=O), 202.2 [COSC(CH<sub>3</sub>)<sub>3</sub>], 134.9 (C=CH), 125.8 (C=CH), 54.2, 52.9, 48.1 [COSC(CH<sub>3</sub>)<sub>3</sub>], 42.6, 37.3, 30.1, 29.8 [COSC(CH<sub>3</sub>)<sub>3</sub>], 28.5, 27.2, 25.3, 25.1. HRMS calc. for C<sub>17</sub>H<sub>26</sub>O<sub>2</sub>S: 294.1653; found: 294.1658.

***S*-tert-Butyl (3aR\*,4R\*,8aR\*)-8a-methyl-1-oxo-1,2,3,3a,4,5,8,8a-octahydroazulene-4-carbothioate (21)**

a. Procedure I, using diene **17** (70.8 mg, 0.222 mmol), catalyst **6** (19 mg, 0.022 mmol, 10 mol%) and benzene (27 mL); reaction time, 72 h; silica gel (3% EtOAc/hexanes); product **21** (25 mg, 40%). Bicyclic product **22** was identify by HPLC-MS analysis and its content was estimated for 15%.

b. Procedure II, using diene **17** (69.1 mg, 0.215 mmol), catalyst **7** (9.1 mg, 0.011 mmol, 5 mol%) ruthenium hydride **9** (10.2 mg, 0.011 mmol, 5 mol%) and benzene (21.5 mL); reaction time 16 h; silica gel (3% EtOAc/hexanes); product **21** (22.8 mg, 38% yield, 77% pure by HPLC ( $R_t = 11.17$  min, detector RI, 5% EtOAc/hexanes):  $^1\text{H}$  NMR (200 MHz): 6.08-5.96 (m, =CH, 1H), 5.96-5.70 (m, =CH, 1H), 3.10-2.90 (m, 1H), 2.57-2.26 (m, 3H), 2.26-1.84 (m, 5H), 1.56-1.38 [m, COSC(CH<sub>3</sub>)<sub>3</sub>, 9H], 1.04-0.93 (m, 1H), 0.87 (s, C8a-CH<sub>3</sub>, 3H);  $^{13}\text{C}$  NMR (50 MHz): 220.9 (C=O), 201.5 [COSC(CH<sub>3</sub>)<sub>3</sub>], 130.5 (=CH), 128.3 (=CH), 53.2, 52.7, 49.7, 48.2, 35.6, 35.4, 30.4, 29.6, 24.4, 16.4. HRMS calc. for C<sub>16</sub>H<sub>24</sub>O<sub>2</sub>SNa: 303.1389; found: 303.1408.

***S*-tert-Butyl (3aR\*,4R\*,9aR\*)-6,6,9a-trimethyl-1-oxo-2,3,3a,4,5,6,9,9a-octahydro-1H-cyclopenta[8]annulen-4-carbothioate (23) and *S*-tert-butyl (2R\*)-4,4-dimethyl-2-((1R\*,2R\*)-2-methyl-3-oxo-2-[(1E,Z)-prop-1-enyl] cyclopentyl)hex-5-carbothioate (24)**

a. Procedure I, using diene **18** (64.0 mg, 0.18 mmol), catalyst **7** (15.5 mg, 0.018 mmol, 10 mol%) and benzene (18 mL); reaction time, 72 h; silica gel (6.0 g, 5% EtOAc/hexanes); product **23** (30.8 mg, 52%). Product **23**:  $^1\text{H}$  NMR (200 MHz): 5.41 (dt,  $J=11.9$ , 1.4 Hz, =CH, 1H), 5.08 (dt,  $J=11.9$ , 8.7 Hz, =CH, 1H), 3.01 [ddd,  $J=13.0$ , 6.0, 3.5 Hz, CHCOSC(CH<sub>3</sub>)<sub>3</sub>, 1H], 2.78-2.26 (m, 5H), 2.24-1.86 (m, 4H), 1.46 [s, COSC(CH<sub>3</sub>)<sub>3</sub>, 9H], 1.05 and 1.04 (s, C6-CH<sub>3</sub>, 6H), 0.99 (s, C9a-CH<sub>3</sub>, 3H);  $^{13}\text{C}$  NMR (50 MHz): 220.2 (C=O), 202.2 [COSC(CH<sub>3</sub>)<sub>3</sub>], 143.4 (=CH), 120.5 (=CH), 52.7, 52.3, 48.2, 40.7, 39.1, 36.9, 33.2, 32.6, 29.6 [COSC(CH<sub>3</sub>)<sub>3</sub>], 29.0, 23.5, 18.9. HRMS (EI) calc. for C<sub>19</sub>H<sub>30</sub>O<sub>2</sub>S: 322.1967; found: 322.1971.

b. Procedure II, using diene **18** (82.4 mg, 0.235 mmol), catalyst **7** (10.0 mg, 0.012 mmol, 5 mol%), ruthenium hydride **9** (11.2 mg, 0.012 mmol, 5 mol%) and benzene (23.5 mL); reaction time 16 h; silica gel (10 g, 5% EtOAc/hexanes); products: **23** (11.4 mg, 15%) and **24** (28.0 mg, 34%). Product **24**:  $^1\text{H}$  NMR (200 MHz): 5.72 (dd,  $J=17.8$ , 6.8 Hz, 1H), 5.53 (dq,  $J=15.5$ , 6.3 Hz, 1H), 5.27 (d,  $J=15.5$  Hz, 1H), 4.98 (d,  $J=8.2$  Hz, 1H), 4.91 (s, 1H), 2.72-2.50 (m, 1H), 2.47-1.82 (m, 6H), 1.68 (dd,  $J=6.1$ , 1.3 Hz, CH=CHCH<sub>3</sub>, 3H), 1.50-1.20 (m, 1H) overlapping 1.43 [s, COSC(CH<sub>3</sub>)<sub>3</sub>, 9H], 1.09 (s, C2-CH<sub>3</sub>, 3H), 1.02 (s, C4a-CH<sub>3</sub>, 6H);  $^{13}\text{C}$  NMR (50 MHz): 220.2 (C=O), 203.2 [COSC(CH<sub>3</sub>)<sub>3</sub>], 147.2 (=CH), 133.7 (=CH), 126.4 (=CH), 111.5 (=CH<sub>2</sub>), 54.7, 50.4, 49.7, 48.1, 41.4, 37.1, 36.3, 29.7 [COSC(CH<sub>3</sub>)<sub>3</sub>], 27.8, 26.6, 21.9, 18.4, 16.1. HRMS (ESI) calc. for C<sub>21</sub>H<sub>34</sub>O<sub>2</sub>S: 373.2172; found: 373.2155.

***S-tert-Butyl* (4aR\*,5R\*,9aR\*)-9a-methyl-1-oxo-2,3,4,4a,5,6,9,9a-octahydro-1H-benz[7]annulen-5-carbothioate (25)**

Procedure I, using diene **19** (56.8 mg, 0.169 mmol), catalyst **7** (7.2 mg, 0.008 mmol) and benzene (17 mL); reaction time, 16 h; silica gel (6.0 g, 4% EtOAc/hexanes); product, **25** (20.7 mg, 42%): <sup>1</sup>H NMR (200 MHz): 5.67-5.55 (m, =CH, 1H), 2.92-1.60 (m, 13H), 1.46 [s, COSC(CH<sub>3</sub>)<sub>3</sub>, 9H], 1.13 (s, C9a-CH<sub>3</sub>, 3H); <sup>13</sup>C NMR (50 MHz): 213.2 (C=O), 202.8 [COSC(CH<sub>3</sub>)<sub>3</sub>], 131.4 (=CH), 126.1 (=CH), 60.9, 54.9, 50.8, 48.1, 42.0, 37.3, 32.9, 29.7, 29.6

***S-tert-Butyl* (4aR\*,5R\*,10aR\*)-7,7,10a-trimethyl-1-oxo-1,2,3,4,4a,5,6,7,10,10a-decahydrobenzo[8]annulene-5-carbothioate (26)**

Procedure I, using diene **20** (68.9 mg, 0.197 mmol), catalyst **7** (8.4 mg, 0.001 mmol, 5 mol%) and benzene (20 mL); reaction time, 16 h; silica gel (7.0 g, 7% EtOAc/hexanes); product, **26** (34.6 mg, 57%): <sup>1</sup>H NMR (500 MHz): 5.33-5.22 (m, =CH, 2H), 2.83 (dt, *J*=13.0, 4.8, 1H), 2.64 (dd, *J*=14.8, 13.2, 1H), 2.55 (dd, *J*=13.5, 8.2 Hz, 1H), 2.47 (dd, *J*=13.5, 8.2 Hz, 1H), 2.39 (dt, *J*=14.2, 6.8 Hz, 1H), 2.28 (ddd, *J*=13.0, 4.5, 2.9 Hz, 1H), 2.15-2.05 (m, 2H), 1.98-1.90 (m, 1H), 1.70-1.62 (m, 1H), 1.52-1.30 (m, 2H) overlapping 1.41 [s, COSC(CH<sub>3</sub>)<sub>3</sub>, 9H], 1.12 [s, C10a-CH<sub>3</sub>, 3H], 0.96 [s, C7-(CH<sub>3</sub>)<sub>2</sub>, 3H], 0.93 [s, C7-(CH<sub>3</sub>)<sub>2</sub>, 3H]; <sup>13</sup>C NMR (125 MHz): 213.3 (C=O), 202.8 [COSC(CH<sub>3</sub>)<sub>3</sub>], 141.3 (=CH), 121.9 (=CH), 57.6 [CHCOSC(CH<sub>3</sub>)<sub>3</sub>], 54.2, 48.1, 40.6, 40.5, 37.4, 37.2 [C(CH<sub>3</sub>)<sub>3</sub>], 33.2, 33.0, 29.6 [CHCOSC(CH<sub>3</sub>)<sub>3</sub>], 28.7, 28.1, 25.6, 21.4. HRMS (ESI) calc. for C<sub>20</sub>H<sub>32</sub>O<sub>2</sub>SNa: 359.2015; found: 359.2030.

**Methyl (3aR\*,4R\*,8aR\*)-7,8a-dimethyl-1-oxo-1,2,3,3a,4,5,8,8a-octahydroazulene-4-carboxylate (32)**

a. Procedure I, using ester **27** (78.4 mg, 0.282 mmol), catalyst **7** (12.0 mg, 0.014 mmol, 5 mol%) and benzene (28 mL); reaction time 16 h; silica gel (0.5 g, 5% EtOAc/hexanes); product, **32** (56.6 mg, 85%).

b. Procedure II, using ester **27** (62.5 mg, 0.225 mmol), catalyst **7** (9.5 mg, 0.011 mmol), ruthenium hydride **9** (10.7 mg, 0.011 mmol) and benzene (22.5 mL); reaction time, 30 min; silica gel (5% EtOAc/hexanes); product, **32** (49.9 mg, 94%): mp 52-54 °C; <sup>1</sup>H NMR (200 MHz): 5.81-5.67 (m, =CH, 1H), 3.66 (s, CO<sub>2</sub>CH<sub>3</sub>, 3H), 2.90-2.78 [m, CHCO<sub>2</sub>CH<sub>3</sub>, 1H], 2.68-2.28 (m, 4H), 2.27-1.86 (m, 5H), 1.78 (s, C7-CH<sub>3</sub>, 3H), 0.76 (s, C8a-CH<sub>3</sub>, 3H); <sup>13</sup>C NMR (50 MHz): 221.0 (C=O), 174.2 (COOCH<sub>3</sub>), 136.4 (C7), 124.2 (C6), 53.6, 51.4, 48.9, 43.1, 40.2,

35.3, 30.0, 27.6, 23.9, 14.2. Found: C 71.27; H 8.56. Calc. for C<sub>14</sub>H<sub>20</sub>O<sub>3</sub> (236.31): C 71.16; H 8.53.

**Methyl (3aR\*,4R\*,8aR\*)-7,8a-dimethyl-1-oxo-1,2,3,3a,4,5,8,8a-octahydroazulene-4-carboxylate (32) and methyl (3aR\*,4R\*,9aR\*)-8,9a-dimethyl-1-oxo-2,3,3a,4,5,6,9,9a-octahydro-1H-cyclopent[8]annulen-4-carboxylate (33)**

Procedure II, using diene **27** (74.6 mg, 0.268 mmol), catalyst **7** (11.3 mg, 0.013 mmol, 5 mol%), ruthenium hydride **9** (2.6 mg, 0.003 mmol, 1 mol%) and benzene (27.0 mL); reaction time 6 h; silica gel (10 g, 5% EtOAc/hexanes); products: **32** (27.9 mg, 38%) and **33** (24.2 mg, 36%). Product **33**: R<sub>f</sub>=0.58 (5% EtOAc/hexane); <sup>1</sup>H NMR (500 MHz): 5.51 (t, *J*=6.4 Hz, =CH, 1H), 3.67 (s, CO<sub>2</sub>CH<sub>3</sub>, 3H), 2.83-2.75 [m, CHCO<sub>2</sub>CH<sub>3</sub>, 1H], 2.70-2.52 (m, 1H), 2.47-2.35 (m, 3H), 2.34-1.90 (m, 6H), 1.68-1.53 (m, 1H) overlapping 1.56 (s, C8-CH<sub>3</sub>, 3H), 0.86 (s, C9a-CH<sub>3</sub>, 3H); <sup>13</sup>C NMR (50 MHz): 222.1 (C=O), 175.6 (COOCH<sub>3</sub>), 132.7 (C8), 127.5 (C7), 53.2, 51.2, 45.6, 42.7, 37.7, 36.3, 27.6, 26.8, 26.3, 24.7, 18.0. HRMS (EI) calc. for C<sub>15</sub>H<sub>22</sub>O<sub>3</sub>: 250.1569; found: 250.1562.

**Methyl (3aR\*,4S\*,9aR\*)-8,9a-Dimethyl-1-oxo-2,3,3a,4,5,6,9,9a-octahydro-1H-cyclopent[8]annulen-4-carboxylate (34)**

Procedure I, using diene **29** (1.020 g, 3.76 mmol), catalyst **7** (93.4 mg, 0.11 mmol, 3 mol%) and DCM (367 mL); reaction time, 6 h; silica gel (30 g, 5% EtOAc/hexanes); product, ester **34** (871.4-889.6 mg, 96-98% yield, 94% pure by HPLC (R<sub>t</sub> = 8.85 min, column RP18, detector RI): <sup>1</sup>H NMR (200 MHz): 5.55-5.39 (m, =CH, 1H), 3.67 (s, COOCH<sub>3</sub>, 3H), 2.78-2.60 (m, 1H), 2.52-1.98 (m, 7H), 1.97-1.70 (m, 3H) overlapping 1.72 (br s, C8-CH<sub>3</sub>, 3H), 1.68-1.40 (m, 1H), 0.92 (s, C9a-CH<sub>3</sub>, 3H); <sup>13</sup>C NMR (50 MHz): 221.0 (C=O), 175.8 (COOCH<sub>3</sub>), 135.2 (C8), 126.0 (C7), 52.4, 51.6, 45.6, 42.2, 37.4, 35.8, 30.6, 27.2, 25.0, 22.8, 16.4. HRMS (EI) calc. for C<sub>15</sub>H<sub>22</sub>O<sub>3</sub>: 250.1569; found: 250.1576.

**Dimers of diene 28**

Procedure I, using ester **28** (36.0 mg, 0.12 mmol), catalyst **7** (10.5 mg, 0.012 mmol) and benzene (12 mL); reaction time 72 h; silica gel (5.0 g, 5% EtOAc/hexanes); product, dimers of diene **28** (28.4 mg, 83%): <sup>1</sup>H NMR (200 MHz): 5.76-5.28 (m, =CH, 3H), 5.10 (dq, *J*=15.4, 1.6 Hz, 1H), 4.93 (br s, 1H), 4.86 (dd, *J*=6.2, 1.2 Hz, 1H), 3.46 (s, COOCH<sub>3</sub>, 6H), 2.56-2.04 (m, 10H), 1.88-1.36 (m, 12H), 1.07 [s, C(2'')CH<sub>3</sub>, 6H], 1.00 [s, C(2'')CH<sub>3</sub>, 6H], 0.96 (s, C2'-CH<sub>3</sub>, 6H); <sup>13</sup>C NMR (50 MHz): 223.0 (C=O), 220.3 (C=O), 176.0 (COOCH<sub>3</sub>), 175.6

(COOCH<sub>3</sub>), 147.0, 132.9, 129.3, 126.4, 111.0, 54.4, 52.2, 51.0, 50.9, 49.2, 43.5, 43.3, 42.8, 42.7, 42.6, 38.9, 36.9, 36.5, 36.0, 27.5, 27.3, 26.2, 26.1, 24.6, 23.8, 18.4, 17.8, 13.9. HRMS calc. for C<sub>34</sub>H<sub>52</sub>O<sub>6</sub>: 556.3764; found: 556.3764.

**Methyl (3aR\*,4R\*,9aR\*)-9a-Methyl-1-oxo-2,3,3a,4,5,6,9,9a-oktahydro-1H-cyclopent[8]annulen-4-carboxylate (35)**

a. Procedure I, using diene **30** (42.0 mg, 0.159 mmol), catalyst **6** (3.9 mg, 0.005 mmol, 3 mol%) and benzene (16 mL); reaction time, 72 h; silica gel (0.5 g, 5% EtOAc/hexanes); product, **35** (19.8 mg, 56%).

b. Procedure II, using diene **30** (22.8 mg, 0.086 mmol), catalyst **7** (3.7 mg, 0.04 mmol, 5 mol%) ruthenium hydride **9** (4.1 mg, 0.004 mmol, 5 mol%) and benzene (16 mL); reaction time, 6 h; silica gel (0.5 g, 3% EtOAc/hexanes); product, **35** (5.4 mg, 28% yield, 94% pure by HPLC (R<sub>t</sub> = 6.42 min, column RP18, detector RI, MeOH : H<sub>2</sub>O = 6 : 4): <sup>1</sup>H NMR (500 MHz): 6.08-5.97 (m, =CH, 1H), 5.82-5.71 (m, =CH, 1H), 3.67 (s, COOCH<sub>3</sub>, 3H), 2.90-2.84 (m, 1H), 2.66 (ddd, J=14.8, 8.6, 4.7 Hz, CHCOOCH<sub>3</sub>, 1H), 2.50-2.33 (m, 3H), 2.25-2.06 (m, 3H), 2.04-1.97 (m, 1H), 1.96-1.87 (m, 1H), 0.76 (s, C9a-CH<sub>3</sub>, 3H); <sup>13</sup>C NMR (50 MHz): 221.0 (C=O), 174.2 (COOCH<sub>3</sub>), 131.5 (=CH), 127.7 (=CH), 53.5, 51.5, 49.4, 42.9, 35.5, 35.2, 30.4, 24.2, 14.9. HRMS calc. for C<sub>13</sub>H<sub>18</sub>O<sub>3</sub>: 222.1256; found: 222.1262.

**Methyl (3aR\*,4S\*,9aR\*)-9a-Methyl-1-oxo-2,3,3a,4,5,6,9,9a-octahydro-1H-cyclopent[8]annulen-4-carboxylate (36)**

Procedure I, using diene **31** (31.0 mg, 0.117 mmol), catalyst **6** (2.9 mg, 0.003 mmol, 3 mol%) and DCM (12 mL); reaction time, 16 h; silica gel (0.5 g, 10% EtOAc/hexanes); product, **36** (26.2 mg, 94%): <sup>1</sup>H NMR (500 MHz): 5.77-5.70 (m, =CH, 1H), 5.65-5.59 (m, =CH, 1H), 3.67 (s, COOCH<sub>3</sub>, 3H), 2.68 (ddd, J=10.2, 6.8, 5.3 Hz, CHCOOCH<sub>3</sub>, 1H), 2.42-2.16 (m, 5H), 2.13-2.04 (m, 2H), 1.96-1.83 (m, 3H), 1.62-1.49 (m, 1H), 0.91 (s, CH<sub>3</sub>, 3H); <sup>13</sup>C NMR (50 MHz): 220.1 (C=O), 175.3 (COOCH<sub>3</sub>), 132.2 (=CH), 126.7 (=CH), 52.2 (C9a), 51.3 (CHCOOCH<sub>3</sub>), 45.2, 41.7, 35.4, 32.0, 29.9, 23.8, 22.6, 15.8 (CH<sub>3</sub>). HRMS (EI) calc. for C<sub>14</sub>H<sub>20</sub>O<sub>3</sub>Na: 236.1412; found: 236.1411.

**(3aR\*,4R\*,9aR\*)-4-(Hydroxymethyl)-9a-methyl-2,3,3a,4,5,6,9,9a-octahydro-1H-cyclopenta[8]annulen-1-on (41)**

Procedure I, using diene **37** (38.0 mg, 0.16 mmol), catalyst **6** (3.9 mg, 0.016 mmol, 3 mol%) and benzene (16 mL); reaction time, 72 h; silica gel (3.0 g, 30%EtOAc/hexanes); product, **41**



(15.7 mg, 47%):  $^1\text{H}$  NMR (200 MHz): 5.82-5.66 (m, =CH, 1H), 5.42-5.22 (m, =CH, 1H), 3.96 (dd,  $J = 10.3, 3.2$  Hz,  $\text{CH}_2\text{OH}$ , 1H), 3.61 (dd,  $J = 10.3, 8.7$  Hz,  $\text{CH}_2\text{OH}$ , 1H), 2.70-2.25 (m, 5H), 2.24-1.74 (m, 7H), 0.91 (m, C9a-CH<sub>3</sub>, 3H);  $^{13}\text{C}$  NMR (200 MHz): 221.0 (C=O), 134.3 (=CH), 123.7 (=CH), 64.2 (CH<sub>2</sub>OH), 53.4, 46.6, 43.0, 36.2, 33.3, 28.7, 27.4, 23.6, 20.1. HRMS calc. for C<sub>13</sub>H<sub>20</sub>O<sub>2</sub>: 208.1463; found: 208.1461.

**[(3a*R*\*,4*R*\*,9a*R*\*)-9a-Methyl-1-oxo-2,3,3a,4,5,6,9,9a-octahydro-1*H*-cyclopent[8]annulen-4-yl]methyl benzoate (42)**

Procedure I, using ester **38** (29.9 mg, 0.088 mmol), catalyst **6** (2.2 mg, 0.0026 mmol, 3 mol%) and benzene (9 mL); reaction time, 72 h; silica gel (1.0 g, 5% EtOAc/hexanes); product, **42** (4.9 mg, 18% yield, 78% pure by HPLC: ( $R_t = 53.9$  min, Nucleosil, detector UV, 3% EtOAc/hexanes);  $^1\text{H}$  NMR (200 MHz): 8.15-8.00 (m, C<sub>6</sub>H<sub>5</sub>, 2H), 7.65-7.40 (m, C<sub>6</sub>H<sub>5</sub>, 3H), 5.88-5.68 (m, =CH, 1H), 5.48-5.26 (m, =CH, 1H), 4.63 (dd,  $J = 10.8, 4.3$  Hz,  $\text{CH}_2\text{OCOC}_6\text{H}_5$ , 1H), 4.28 (dd,  $J = 10.8, 9.4$  Hz,  $\text{CH}_2\text{OCOC}_6\text{H}_5$ , 1H), 2.78-2.22 (m, 6H), 2.20-1.78 (m, 6H), 1.00 (s, CH<sub>3</sub>, 3H);  $^{13}\text{C}$  NMR (50 MHz): 220.6 (C=O), 166.6 (C<sub>6</sub>H<sub>5</sub>C=O), 134.1 (=CH), 133.0 (=CH), 130.2 (=CH), 129.5 (C<sup>IV</sup>, C<sub>6</sub>H<sub>5</sub>), 128.4 (=CH), 123.9 (=CH), 66.5, 53.4, 42.9, 42.8, 36.2, 33.3, 28.7, 28.0, 23.6, 20.1. HRMS calc. for C<sub>20</sub>H<sub>24</sub>O<sub>3</sub>: 312.1725; found: 312.1728.

**(3a*R*\*,4*S*\*,9a*R*\*)-4-(Hydroxymethyl)-9a-methyl-2,3,3a,4,5,6,9,9a-octahydro-1*H*-cyclopent[8]annulen-1-on (43)**

Procedure I, using diene **39** (30 mg, 0.127 mmol), catalyst **6** (3.1 mg, 0.004 mmol, 3 mol%) and DCM (13 mL); reaction time, 16 h; silica gel (6.0 g, 35% EtOAc/hexanes); product, **43** (26.1 mg, 99%):  $^1\text{H}$  NMR (200 MHz): 5.80-5.49 (m, =CH, 2H), 3.73 (dd,  $J = 10.6, 4.9$  Hz,  $\text{CH}_2\text{OH}$ , 1H), 3.62 (dd,  $J = 10.6, 6.0$  Hz,  $\text{CH}_2\text{OH}$ , 1H), 2.49-2.20 (m, 4H), 2.20-1.70 (m, 6H), 1.64-1.42 (m, 2H) overlapping 1.57 (br s, 1H, -OH, disappears on exchange with D<sub>2</sub>O), 0.87 (s, C9a-CH<sub>3</sub>, 3H);  $^{13}\text{C}$  NMR (50 MHz): 221.8 (C=O), 132.7 (=CH), 126.3 (=CH), 65.4 (CH<sub>2</sub>OH), 52.2, 46.0, 36.6, 36.0, 32.5, 30.0, 24.2, 21.6, 16.1. HRMS calc. for C<sub>13</sub>H<sub>20</sub>O<sub>2</sub>: 208.1463; found: 208.1456.

**[(3a*R*\*,4*S*\*,9a*R*\*)-9a-Methyl-1-oxo-2,3,3a,4,5,6,9,9a-octahydro-1*H*-cyclopent[8]annulen-4-yl]methyl benzoate (44)**

Procedure, I using diene **40** (94.0 mg, 0.276 mmol), catalyst **6** (6.8 mg, 0.008 mmol, 3 mol%) and DCM (28 mL); reaction was heated under reflux for 16 h; silica gel (1.0 g, 10% EtOAc/hexanes); product, **44** (colourless oil, 85.3 mg, 99%):  $^1\text{H}$  NMR (200 MHz): 8.10-7.98

(m, C<sub>6</sub>H<sub>5</sub>, 2H), 7.66-7.38 (m, C<sub>6</sub>H<sub>5</sub>, 3H), 5.90-5.54 (m, =CH, 2H), 4.39 (dd, *J* = 11.3, 5.3 Hz, CH<sub>2</sub>OCOC<sub>6</sub>H<sub>5</sub>, 1H), 4.29 (dd, *J* = 11.3, 5.5 Hz, CH<sub>2</sub>OCOC<sub>6</sub>H<sub>5</sub>, 1H), 2.52-1.40 (m, 12H), 0.91 (s, CH<sub>3</sub>, 3H); <sup>13</sup>C NMR (50 MHz): 221.2 (C=O), 166.4 (C=O), 133.0 (=CH), 132.5 (=CH), 130.1 (C<sup>IV</sup>, C<sub>6</sub>H<sub>5</sub>), 129.4 (=CH), 128.4 (=CH), 126.5 (=CH), 67.6, 52.1, 46.1, 36.0, 33.7, 32.5, 30.6, 24.2, 21.8, 16.0. HRMS (EI) calc. for C<sub>20</sub>H<sub>24</sub>O<sub>3</sub>: 312.1722; found: 312.1725.

## Syntheses of dienes

### Hex-5-enoic acid<sup>1</sup>

Aqueous H<sub>2</sub>O<sub>2</sub> (30%, 227 mL, 2 mol) was added dropwise, within 30 min, maintaining the temperature at 20-25 °C, to a stirred mixture of cyclohexanone (98.0 g, 1 mol) and MeOH (100 mL). The mixture was then added dropwise, within 3 to 4 hrs, maintaining the temperature at 18-20 °C, to a solution of FeSO<sub>4</sub>·6H<sub>2</sub>O (278 g, 1 mol) and CuSO<sub>4</sub>·5H<sub>2</sub>O (250 g, 1 mol) in water (1.8 L). The mixture was then extracted with Et<sub>2</sub>O (3 × 200 mL). The combined extracts were washed with 20% aq NaOH (3 × 100 mL). The alkaline extract was brought to pH 2 with 20% H<sub>2</sub>SO<sub>4</sub> (ca. 250 mL) and the solution was extracted with Et<sub>2</sub>O (3 × 200 mL). The combined extracts were washed with water (2 × 100 mL), brine (2 × 200 mL) and dried (MgSO<sub>4</sub>). The solution was concentrated and then the residue was distilled in vacuo collecting the fraction at 87-90 °C/10 mmHg, to give hex-5-ene carboxylic acid (51.8 g, 42%, 94% pure by GC): <sup>1</sup>H NMR (200 MHz) 11.40-11.20 (m, 1H), 5.88-5.64 (m, 1H), 5.10-5.82 (m, 2H), 2.36 (t, *J*=7.6 Hz, 2H), 2.18-2.02 (m, 2H), 1.82-1.74 (m, 2H); <sup>13</sup>C NMR (50MHz) 180.3, 137.4, 115.5, 33.3, 32.9, 23.7.

### Methyl hex-5-enoate

Me<sub>3</sub>SiCl (0.44 mL, 3.5 mmol) was added to a solution of hex-5-enoic acid (8.010 g, 70.0 mmol) in anhyd MeOH (140 mL). The mixture was heated under reflux for 4 h and then distilled at the atmospheric pressure. The fraction at 140-142 °C was collected to give the title compound (7.63 g, 85%): <sup>1</sup>H NMR (200 MHz) 5.90-5.68 (m, 1H), 5.12-4.90 (m, 2H), 3.67 (s, 3H), 2.32 (t, *J*=7.2, 2H), 2.47-2.28 (m, 2H), 1.85-1.63 (m, 2H); <sup>13</sup>C NMR (50MHz) 174.0, 137.6, 115.3, 51.4, 33.2, 33.0, 24.0. Spectrum in agreement with that reported.<sup>2</sup>

### *S*-tert-Butyl hex-5-enethioate

a. Thionyl chloride (8.9 mL, 0.12 mol) and a drop of DMF were added to a mixture of hex-5-enoic acid (11.7 g, 0.10 mol) and benzene (20 mL), stirred at rt. The solvent was evaporated and the residue was added dropwise to a mixture of *t*-BuSH (10.1 mL, 0.90 mol) and Et<sub>3</sub>N (16.7 mL, 0.12 mol) and DCM (150 mL), stirred at 0 °C. The cooling bath was removed and, after 30 min, the mixture was washed consecutively with water (2 × 50 mL) and 5% HCl (2 × 50 mL), and dried. The solvent was evaporated and then the residue was distilled in vacuo collecting the fraction at 64-68 °C/1.7 mmHg to give the title product (light yellow oil, 14.7 g, 77% yield, 98% pure by GC).

b. <sup>3</sup> *tert*-BuSH (3.608 g, 40.0 mmol) was added at 0 °C, under argon, to a stirred mixture of Me<sub>3</sub>Al (2 M in heptane, 20 mL, 40.0 mmol) and DCM (40 mL). The solution was warmed to rt in ca. 10 min and, after subsequent 30 min, recooled to 0 °C again and methyl hex-5-enoate<sup>2</sup> (2.560 g, 20.0 mmol) was added. The mixture was stirred at rt 14 h and then water (100 mL) and 3% HCl (50 mL) were added. The aq layer was separated and extracted with DCM (3 × 50 mL). The combined organic solutions were washed with 5% NaOH (3 × 30 mL) and dried. The solvent was evaporated to give the title product (3.68 g, 99% yield, 94% pure by GC): <sup>1</sup>H NMR (200 MHz): 5.88-5.64 (m, =CH, 1H), 5.10-4.92 (m, =CH<sub>2</sub>, 2H), 2.46 [t, *J*=7.2 Hz, CH<sub>2</sub>COSC(CH<sub>3</sub>)<sub>3</sub>, 2H], 2.16-2.00 (m, 2H), 1.82-1.64 (m, 2H), 1.45 [s, COSC(CH<sub>3</sub>)<sub>3</sub>, 9H]; <sup>13</sup>C NMR (50MHz): 200.1 [COSC(CH<sub>3</sub>)<sub>3</sub>], 137.5 (=CH), 115.3 (=CH<sub>2</sub>), 47.8 [COSC(CH<sub>3</sub>)<sub>3</sub>], 43.8, 32.8, 29.8 [COSC(CH<sub>3</sub>)<sub>3</sub>], 24.7. HRMS (ESI) calc. for C<sub>10</sub>H<sub>18</sub>OSNa: 209.0971; found: 209.0980.

### Hept-5-enoic acid

A solution of *t*-BuOK (8.38 g, 19.0 mmol) in THF (80 mL) was added to a stirred at rt suspension of (4-carboxybutyl)triphenylphosphonium bromide<sup>4</sup> (16.362 g, 36.9 mmol) in THF (20 mL). After 3 h, freshly distilled acetaldehyde (8 mL) in THF (20 mL) was added. After 1 h, the solvent was evaporated and residue was diluted with water (200 mL) and the solid material was filtered off. The filtrate was acidified with H<sub>3</sub>PO<sub>4</sub> (100 mL, 1:1 = conc H<sub>3</sub>PO<sub>4</sub>:H<sub>2</sub>O) and extracted with DCM (4 × 50 mL). The combined organic solutions were dried, the solvent was evaporated and the residue was distilled at 130-132 °C/27 mmHg to give hept-5-enoic acid as a yellow oil (2.305 g, 49%): <sup>1</sup>H NMR (200 MHz): 9.80-9.00 (br s, COOH, 1H), 5.60-5.20 (m, =CH, 2H), 2.36 (t, *J*=7.2 Hz, CH<sub>2</sub>CO<sub>2</sub>H, 2H), 2.20-1.96 (m, 2H), 1.82-1.55 (m, 5H). Reported distillation temp.<sup>5</sup>: 120-121 °C/16 mmHg.

### *S-tert*-Butyl hept-5-enethioate

Thionyl chloride (2.2 mL, 29.4 mmol) and a drop of DMF were added to a mixture of hept-5-enoic acid (3.131 g, 24.5 mmol) and benzene (5 mL), stirred at rt. The solvent was evaporated and the residue was added dropwise to a mixture of *tert*-BuSH (3 mL, 26.9 mmol), Et<sub>3</sub>N (4.9 mL, 35.0 mmol) and DCM (37 mL), stirred at 0 °C. The cooling bath was removed and, after 30 min, the mixture was washed consecutively with water (2 × 25 mL) and 5% HCl (1 × 10 mL), dried. The solvent was evaporated and the residue was distilled in vacuo collecting the fraction at 84-88 °C/2.0 mmHg to give the title product (colourless oil, 2.690 g, 55%): GC 13.3 and 13.2 (dr=7:1, 60-200 °C, 60 °C-1 min., 10 °C/min.); <sup>1</sup>H NMR (200 MHz): 5.60-5.25 (m, =CH, 2H), 2.45 [t, *J*=7.3 Hz, CH<sub>2</sub>COSC(CH<sub>3</sub>)<sub>3</sub>, 2H], 2.20-1.90 (m, 2H), 1.82-1.50 (m, 5H), 1.45 [s, CH<sub>2</sub>COSC(CH<sub>3</sub>)<sub>3</sub>, 9H]; <sup>13</sup>C NMR (50 MHz): 175.7 [COSC(CH<sub>3</sub>)<sub>3</sub>], 129.3 (=CH), 124.9 (=CH), 47.7, 43.9, 29.8 [COSC(CH<sub>3</sub>)<sub>3</sub>], 25.9, 25.3, 12.7. HRMS (EI) calc. for C<sub>11</sub>H<sub>20</sub>OS: 200.1235; found: 200.1239.

#### ***S*-(*tert*-Butyl) hept-6-enthioate**

Thionyl chloride (1.4 mL, 72.0 mmol) and a drop of DMF were added to a mixture of hept-6-enoic acid (2.00 g, 16.5 mmol) and benzene (3.3 mL), stirred at rt. The solvent was evaporated and the residue was added dropwise to a mixture of *tert*-BuSH (1.8 mL, 15.5 mmol), Et<sub>3</sub>N (2.6 mL, 18.7 mmol) and DCM (25 mL), stirred at 0 °C. The cooling bath was removed and, after 30 min, the mixture was washed consecutively with water (2 × 20 mL) and 5% HCl (1 × 20 mL), and dried. The solvent was evaporated and the residue was distilled in vacuo collecting the fraction at 80-82 °C/2.0 mmHg to give the title product (colourless oil, 2.806 g, 92%): <sup>1</sup>H NMR (200 MHz): 6.00-5.5.80 (m, =CH, 1H), 5.14-4.92 (m, =CH<sub>2</sub>, 2H), 2.53 [t, *J*=7.2 Hz, CH<sub>2</sub>COSC(CH<sub>3</sub>)<sub>3</sub>, 2H], 2.24-2.04 (m, 2H), 1.90-1.30 (m, 4H) overlapping 1.54 [s, CH<sub>2</sub>COSC(CH<sub>3</sub>)<sub>3</sub>, 9H]; <sup>13</sup>C NMR (50 MHz): 200.2 [COSC(CH<sub>3</sub>)<sub>3</sub>], 138.3 (=CH), 114.7 (=CH), 47.7 [COSC(CH<sub>3</sub>)<sub>3</sub>], 44.4, 33.3, 29.7 [COSC(CH<sub>3</sub>)<sub>3</sub>], 28.1, 25.0. HRMS (EI) calc. for C<sub>11</sub>H<sub>20</sub>OS: 200.1235; found: 200.1240.

#### **4,4-Dimethylhex-5-en-1-ol**

To a suspension of Mg (2.413 g, 89.3 mmol) in Et<sub>2</sub>O (75 mL), stirred at 0 °C, prenyl bromide (11.012 g, 74.4 mmol) in Et<sub>2</sub>O (75 mL) was added dropwise at within 3 h. To the Grignard reagent thus prepared, oxetane (5.8 mL, 89.3 mmol) was added dropwise at 0 °C and the mixture was stirred at 0 °C for 3 h and then at rt for 16 h. The reaction was quenched with 20% HCl (30 mL) and the organic phase was separated. The aq phase was extracted with Et<sub>2</sub>O (2 × 40 mL). The combined organic solutions was washed with brine (1 × 20 mL) and dried. The solvent was evaporated and the residue was distilled in vacuo collecting the fraction at

89-92 °C/10 mmHg to the title product (colourless oil, 5.911 g, 62%): <sup>1</sup>H NMR (200 MHz): 5.75 (dd, *J*=18.1, 10.1 Hz, =CH, 1H), 4.96-4.89 (m, =CH<sub>2</sub>, 1H), 4.87 (dd, *J*=5.4, 1.4 Hz, =CH<sub>2</sub>, 1H), 3.59 (t, *J*=6.3 Hz, CH<sub>2</sub>OH, 2H), 1.65-1.22 (m, 4H), 0.97 (s, CH<sub>3</sub>, 6H); <sup>13</sup>C NMR (50 MHz): 148.1 (=CH), 110.5 (=CH<sub>2</sub>), 63.6 (CH<sub>2</sub>OH), 38.5, 37.2, 28.0, 26.7 (CH<sub>3</sub>). Spectral data are in agreement with those reported.<sup>6</sup>

#### 4,4-Dimethylhex-5-enoic acid

Jones' reagent (ca. 17.5 mL) was added dropwise to a stirred solution of 4,4-dimethylhex-5-en-1-ol (5.824 g, 45.6 mmol) in acetone (30 mL), until deep orange colour persisted. After 0.5 h, *i*-PrOH (ca. 0.5 mL) was added and the solvent was evaporated. The residue was diluted with water (100 mL) and extracted with hexanes (3 × 20 mL). The combined organic extracts were dried and the solvent was evaporated. The residue was distilled in vacuo collecting the fraction at 88-90 °C/3 mmHg to give the title product (colourless oil, 4.530 g, 70%): <sup>1</sup>H NMR (200 MHz): 11.60-10.80 (br s, COOH, 1H), 5.72 (dd, *J*=17.2, 10.9 Hz, =CH, 1H), 4.98 (m, *J*=10.9, 1.3 Hz, =CH<sub>2</sub>, 1H), 4.91 (dd, *J*=10.9, 1.3 Hz, =CH<sub>2</sub>, 1H), 2.35-2.18 (m, 2H), 1.73-1.55 (m, 2H), 1.00 (s, CH<sub>3</sub>, 6H); <sup>13</sup>C NMR (50 MHz): 180.8 (COOH), 146.8 (=CH), 111.6 (=CH<sub>2</sub>), 36.7, 36.2 [C(CH<sub>3</sub>)<sub>2</sub>], 29.9, 26.7 (CH<sub>3</sub>).

#### *S*-tert-Butyl 4,4-dimethylhex-5-enethioate

Thionyl chloride (4.5 mL, 60.0 mmol) and a drop of DMF were added to a mixture of 4,4-dimethylhex-5-enoic acid (7.110 g, 50.0 mmol) and benzene (10 mL), stirred at rt. The solvent was evaporated and the residue was added dropwise to a mixture of *tert*-BuSH (5.0 mL, 45.0 mmol) and Et<sub>3</sub>N (8.4 mL, 60.0 mmol) and DCM (40 mL), stirred at 0 °C. The cooling bath was removed and, after 30 min, the mixture was washed consecutively with water (2 × 40 mL) and 5% HCl (1 × 25 mL), and dried. The solvent was evaporated and the residue was distilled in vacuo collecting the fraction at 94-96 °C/1.0 mmHg to give the title product (colourless oil, 10.715 g, 84%): <sup>1</sup>H NMR (200 MHz): 5.70 (dd, *J*=17.2, 11.0 Hz, =CH, 1H), 5.00-4.90 (m, =CH<sub>2</sub>, 2H), 2.42-2.32 [m, CH<sub>2</sub>COSC(CH<sub>3</sub>)<sub>3</sub>, 2H], 1.68-1.54 [m, CH<sub>2</sub>CH<sub>2</sub>COSC(CH<sub>3</sub>)<sub>3</sub>, 2H], 1.43 [s, COSC(CH<sub>3</sub>)<sub>3</sub>, 9H], 0.97 (s, CH<sub>3</sub>, 6H); <sup>13</sup>C NMR (50 MHz): 200.6 [COSC(CH<sub>3</sub>)<sub>3</sub>], 147.0 (=CH), 111.4 (=CH<sub>2</sub>), 47.7 [C(CH<sub>3</sub>)<sub>2</sub>], 40.6, 37.5, 36.3, 29.8 [COSC(CH<sub>3</sub>)<sub>3</sub>], 26.5 (CH<sub>3</sub>). HRMS (EI) calc. for C<sub>12</sub>H<sub>22</sub>OSNa: 237.1284; found: 237.1295.

**{1(Z)-1-[(*tert*-Butylthio)hexa-1,5-dienyl]oxo}trimethylsilane (45)**

*S*-(*tert*-Butyl) hex-5-enethioate<sup>7</sup> (12.1 g, 65.0 mmol) was added dropwise to a solution LDA (78 mmol) [prepared from (*i*-Pr)<sub>2</sub>NH (1.102 mL, 78 mmol) in THF (100 mL) and *n*-BuLi (2.5 M in hexanes, 31 mL, 78 mmol)], stirred at -78 °C. After 30 min, Me<sub>3</sub>SiCl (9.89 mL, 78 mmol) was added. The solution was stirred at rt for 3 h and then the solvent was evaporated. The residue was diluted with hexanes (200 mL) and filtered through a pad of Celite. The solvent was evaporated and the residue was distilled at 79-82 °C/3 mmHg to give **45** [14.4 g, 87%, GC analysis of this product showed the presence of one isomer (Z) only]: <sup>1</sup>H NMR (200 MHz): 5.92-5.68 (m, CH=CH<sub>2</sub>, 1H), 5.20 [t, *J* = 7.2 Hz, =CHCOSC(CH<sub>3</sub>)<sub>3</sub>, 1H], 5.10-4.90 (m, CH=CH<sub>2</sub>, 2H), 2.37-2.20 (m, 2H), 2.18-2.00 (m, 2H), 1.37 [s, SC(CH<sub>3</sub>)<sub>3</sub>, 9H], 0.22 [s, Si(CH<sub>3</sub>)<sub>3</sub>, 9H]; <sup>13</sup>C NMR (50 MHz): 145.5 [HC=CS(CH<sub>3</sub>)<sub>3</sub>OSi(CH<sub>3</sub>)<sub>3</sub>], 138.2 [HC=CS(CH<sub>3</sub>)<sub>3</sub>OSi(CH<sub>3</sub>)<sub>3</sub>], 119.8 (=CH), 114.7 (=CH<sub>2</sub>), 46.3, 34.2, 31.8 [SC(CH<sub>3</sub>)<sub>3</sub>], 31.4, 28.7, 0.8 [Si(CH<sub>3</sub>)<sub>3</sub>], 0.3 [Si(CH<sub>3</sub>)<sub>3</sub>]. HRMS (EI) calc. for C<sub>9</sub>H<sub>17</sub>OSSi (M<sup>+</sup>-C<sub>4</sub>H<sub>9</sub>) 201.0769; found: 201.0758.

**{1(Z)-1-[(*tert*-Butylthio)hepta-1,5-dienyl]oxo}trimethylsilane (48)**

*S*-(*tert*-Butyl) hept-5-enethioate<sup>7</sup> (2.695 g, 13.5 mmol) was added dropwise to a solution LDA (17.5 mmol) [prepared from (*i*-Pr)<sub>2</sub>NH (2.5 mL, 17.5 mmol) in THF (22 mL) and *n*-BuLi (2.5 M in hexanes, 7.0 mL, 17.5 mmol)], stirred at -78 °C. After 30 min, Me<sub>3</sub>SiCl (2.2 mL, 16.8 mmol) was added. The solution was stirred at rt for 3 h and then the solvent was evaporated. The residue was diluted with hexanes (28 mL) and filtered through a pad of Celite. The solvent was evaporated and the residue was distilled in vacuo collecting the fraction at 100-103 °C/2 mmHg to give **48** (3.040 g, 82% yield, 94% pure by GC) (GC analysis of this product showed the presence of four isomers, isomer ratio, 7 : 1, C5-C6, and 12 : 1, C1-C2: <sup>1</sup>H NMR (200 MHz): 5.60-5.5.26 (m, =CH, 2H), 5.21 [t, *J*=7.4 Hz, =CHCOSC(CH<sub>3</sub>)<sub>3</sub>, 1H], 2.35-1.85 (m, 4H), 1.70-1.55 (m, =CHCH<sub>3</sub>, 3H), 1.37 [s, SC(CH<sub>3</sub>)<sub>3</sub>, 9H], 0.22 [s, Si(CH<sub>3</sub>)<sub>3</sub>, 9H]; separated signal of an isomer: 5.19 [t, *J*=7.4 Hz, =CHCOSC(CH<sub>3</sub>)<sub>3</sub>]; <sup>13</sup>C NMR (50 MHz): 130.0 (=CH), 124.2 (=CH), 120.1, 46.3 [SC(CH<sub>3</sub>)<sub>3</sub>], 31.7, 31.3, 29.2, 27.3, 12.8, 0.2 [Si(CH<sub>3</sub>)<sub>3</sub>]. HRMS (EI) calc. for C<sub>14</sub>H<sub>28</sub>OSSi: 272.1630; found: 272.1626.

**(1Z)-[1-[(*tert*-Butylthio)hepta-1,6-dienyloxy]trimethylsilane (47)**

*S*-(*tert*-Butyl) hept-6-enethioate<sup>7</sup> (3.648 g, 18.2 mmol) was added dropwise to a solution LDA (21.9 mmol) [prepared from (*i*-Pr)<sub>2</sub>NH (3.1 mL, 21.9 mmol) in THF (23 mL) and *n*-BuLi (2.5 M in hexanes, 8.8 mL, 21.9 mmol)], stirred at -78 °C. After 30 min, Me<sub>3</sub>SiCl (2.8 mL, 21.9

mmol) was added. The solution was stirred at rt for 3 h and the solvent was evaporated. The residue was diluted with hexanes (50 mL) and filtered through a pad of Celite. The solvent was evaporated and the residue was distilled in vacuo collecting the fraction at 100-102 °C/2 mmHg to give **47** (4.549 g, 92% yield, 98% pure by GC): <sup>1</sup>H NMR (200 MHz): 5.94-5.70 (m, CH=CH<sub>2</sub>, 1H), 5.20 [t, *J*=7.4 Hz, =CHCOSC(CH<sub>3</sub>)<sub>3</sub>, 1H], 5.08-4.88 (m, CH=CH<sub>2</sub>, 2H), 2.24-1.94 (m, 4H), 1.45-1.30 (m, 2H) overlapping 1.37 [s, SC(CH<sub>3</sub>)<sub>3</sub>, 9H], 0.21 [s, Si(CH<sub>3</sub>)<sub>3</sub>, 9H]; <sup>13</sup>C NMR (50 MHz): 145.4 HC=CS(CH<sub>3</sub>)<sub>3</sub>OSi(CH<sub>3</sub>)<sub>3</sub>, 138.8 [HC=CS(CH<sub>3</sub>)<sub>3</sub>OSi(CH<sub>3</sub>)<sub>3</sub>], 120.4 (=CH), 114.4 (=CH<sub>2</sub>), 46.3 [SC(CH<sub>3</sub>)<sub>3</sub>], 33.4, 31.8 [SC(CH<sub>3</sub>)<sub>3</sub>], 29.4, 28.7, 0.3 [Si(CH<sub>3</sub>)<sub>3</sub>]. HRMS (EI) calc. for C<sub>14</sub>H<sub>28</sub>OSiS: 272.1630; found: 272.1641.

**(1E)-(1-(tert-Butylthio)-4,4-dimethylhexa-1,5-dienyloxy)trimethylsilane (46)**

*S*-(tert-Butyl) 4,4-dimethylhex-5-enthioate<sup>7</sup> (4.420 g, 20.6 mmol) was added dropwise to a solution LDA (24.8 mmol) [prepared from (*i*-Pr)<sub>2</sub>NH (3.5 mL, 24.8 mmol) in THF (32 mL) and *n*-BuLi (9.9 mL, 24.8 mmol, 2.5 M in hexanes,)], stirred at -78 °C. After 30 min, Me<sub>3</sub>SiCl (3.2 mL, 24.8 mmol) was added. The solution was stirred at rt for 3 h and then the solvent was evaporated. The residue was diluted with hexanes (54 mL) and filtered through a pad of Celite. The solvent was evaporated and the residue was distilled in vacuo collecting the fraction at 123-125 °C/0.1 mmHg to give **46** (4.607 g, 78% yield, isomer ratio 4.9:1 from <sup>1</sup>H NMR): <sup>1</sup>H NMR (200 MHz): 5.90-5.68 (m, CH=CH<sub>2</sub>, 1H), 5.15 [t, *J* = 7.6 Hz, =CHCOSC(CH<sub>3</sub>)<sub>3</sub>, 1H], 4.98-4.84 (m, CH=CH<sub>2</sub>, 2H), 2.21 (d, *J* = 7.6 Hz, CH<sub>2</sub>, 2H), 1.36 [s, SC(CH<sub>3</sub>)<sub>3</sub>, 9H], 0.98 [s, C4-CH<sub>3</sub>, 6H], 0.21 [s, Si(CH<sub>3</sub>)<sub>3</sub>, 6H]; separated signals of the minor isomer: 5.17 (t, *J* = 7.3 Hz, =C2H), 2.05 (d, *J* = 7.3 Hz, CH<sub>2</sub>), 1.33 [s, SC(CH<sub>3</sub>)<sub>3</sub>]; <sup>13</sup>C NMR (50 MHz): 148.2, 146.4, 116.9, 110.4, 46.5, 41.9, 37.5, 31.8, 31.5, 26.8, 26.7, 24.5, 0.38; separated signals of the minor isomer: 31.5, 0.88. HRMS (ESI) calc. for C<sub>15</sub>H<sub>30</sub>OSSiNa: 309.1679; found: 309.1686

***S*-tert-Butyl (2*R*\*)-2-[(1*R*\*,2*R*\*)-2-methyl-2-(2-methylprop-2-enyl)-3-oxocyclopentyl]hex-5-enthioate (3)**

2-Methylcyclopent-2-en-1-one (**49**) (0.96 g, 10.0 mmol) was added dropwise to a mixture of **45** (3.43 g, 12.0 mmol), Me<sub>3</sub>SiOTf (100 μL, 0.5 mmol, 5 mol%) and anhyd DCM (30 mL), stirred under argon at -78 °C. Stirring at -78 °C was continued for 3 h and then 2-pyridinemethanol (72 μL, 0.75 mmol, 7.5 mol%) was added. The mixture was allowed to warm to rt (in ca. 30 min) and then it was diluted with hexanes (60 mL) and filtered through

deactivated silica gel (12 g). The solvent was evaporated in vacuo to give silyl enol ether 51 as a light yellow oil. A solution of this product and methyl 2-methylprop-2-enyl carbonate<sup>8</sup> (**53**), (2.60 g, 20.0 mmol) in THF (12 mL) was added to a solution of Pd(OAc)<sub>2</sub> (112.0 mg, 0.5 mmol, 5 mol%) and dppb (213.1 mg, 0.5 mmol, 5 mol%) in THF (18 mL), and stirred under argon at rt. Stirring was continued for 120 h and then the solvent was evaporated. The residue was chromatographed on silica gel (3% EtOAc/hexanes) to give **3** as a light yellow oil (1.79 g, 86%): <sup>1</sup>H NMR (200 MHz): 5.90-5.66 (m, CH=CH<sub>2</sub>, 1H), 5.10-4.92 (m, CH=CH<sub>2</sub>, 2H), 4.85 (br s, CH<sub>2</sub>=CCH<sub>3</sub>, 1H), 4.69 (br s, CH<sub>2</sub>=CCH<sub>3</sub>, 1H), 2.69-2.49 (m, 2H), 2.47-2.23 (m, 2H), 2.22-1.92 (m, 5H), 1.84-1.30 (m, 3H) overlapping 1.58 (s, CH<sub>2</sub>=CCH<sub>3</sub>, 3H) and 1.48 [s, COSC(CH<sub>3</sub>)<sub>3</sub>, 9H], 1.02 (s, C2-CH<sub>3</sub>, 3H); <sup>13</sup>C NMR (50 MHz): 222.4 (C=O), 202.8 [COSC(CH<sub>3</sub>)<sub>3</sub>], 141.4 (CH<sub>2</sub>=CCH<sub>3</sub>), 137.8 (CH=CH<sub>2</sub>), 115.3 (2 × =CH<sub>2</sub>), 54.2, 51.7, 48.7, 43.8, 42.9, 37.5, 30.9, 30.7, 29.8 [COSC(CH<sub>3</sub>)<sub>3</sub>], 24.6, 23.3, 20.1. HRMS (EI) calc. for C<sub>20</sub>H<sub>32</sub>O<sub>2</sub>S: 336.2123; found: 336.2125.

***S*-tert-Butyl (2*R*\*,5*E/Z*)-2-[(1*R*\*,2*R*\*)-2-methyl-2-(2-methyl-2-propenyl)-3-oxocyclopentyl]hept-5-enethioate (**11**)**

2-Methylcyclopent-2-en-1-one (**49**) (352.0 mg, 3.67 mmol) in DCM (13 mL) was added dropwise to a mixture of 48 (1.211 g, 4.40 mmol), Me<sub>3</sub>SiOTf (36 μL, 0.18 mmol, 5 mol%) and anhyd DCM (20 mL), stirred under argon at -78 °C. Stirring at -78 °C was continued for 1 h and then 2-pyridinemethanol (26 μL, 0.33 mmol, 7.5 mol%) was added. The mixture was allowed to warm to rt (in ca. 30 min) and then it was diluted with hexanes (66 mL), and filtered through deactivated silica gel (6 g). The solvent was evaporated to give silyl enol ether **51** as a light yellow oil. A solution of this product and carbonate **53** (1.131 g, 8.80 mmol) in THF (5 mL) was added to a stirred solution of Pd(OAc)<sub>2</sub> (40.3 mg, 0.18 mmol, 5 mol%) and dppb (76.8 mg, 0.18 mmol, 5 mol%) in THF (15 mL). Stirring was continued 72 h at rt and then the solvent was evaporated. The residue was chromatographed on silica gel (2-5% EtOAc/hexanes) to give **11** (815.5 mg, 64%): <sup>1</sup>H NMR (200 MHz): 5.56-5.25 (m, =CH, 2H), 4.95 (br s, =CH, 1H), 4.85 (br s, =CH, 1H), 4.67 (br s, =CH, 1H), 2.70-2.48 (m, 2H), 3.79 (s, a contamination), 2.47-1.93 (m, 7H), 1.82-1.25 (m, 6H) overlapping 1.58 (br s, CH<sub>2</sub>=CCH<sub>3</sub>, 3H) and 1.49 [s, COSC(CH<sub>3</sub>)<sub>3</sub>, 9H], 1.02 (s, C2-CH<sub>3</sub>, 3H); <sup>13</sup>C NMR (50 MHz): 222.6 (C=O), 203.1 [COSC(CH<sub>3</sub>)<sub>3</sub>], 141.5 (CH<sub>2</sub>=CCH<sub>3</sub>), 129.5 (=CH), 124.8 (=CH), 115.3 (CH<sub>2</sub>=CCH<sub>3</sub>), 54.4, 51.7, 48.6, 43.8, 42.9, 37.5, 31.2, 29.7 [SC(CH<sub>3</sub>)<sub>3</sub>], 24.6, 24.2, 23.2, 20.0, 12.8. HRMS (EI) calc. for C<sub>21</sub>H<sub>34</sub>O<sub>2</sub>S: 350.2280; found: 350.2274.



***S*-tert-Butyl (2*R*\*)-2-[(1*R*\*,2*R*\*)-2-methyl-2-(2-methyl-2-propenyl)-3-oxocyclopentyl]hept-6-enethioate (12)**

2-Methylcyclopent-2-en-1-one (**49**) (192 mg, 2.00 mmol) was added dropwise to a mixture of **47** (614.9 mg, 2.40 mmol), Me<sub>3</sub>SiOTf (19.7 μl, 0.10 mmol, 5 mol%) and anhyd DCM (15 mL), stirred under argon at -78 °C. Stirring at -78 °C was continued for 3 h and then 2-pyridinemethanol (14.5 μl, 0.15 mmol, 7.5 mol%) was added. The mixture was allowed to warm to rt (in ca. 30 min) and then it was diluted with hexanes (30 mL) and filtered through deactivated silica gel (6 g). The solvent was evaporated to give silyl enol ether **51** as a light yellow oil. A solution of this product and carbonate **53** (520.0 mg, 4.00 mmol) in THF (5 mL) was added to a stirred solution of Pd(OAc)<sub>2</sub> (22.4 mg, 0.1 mmol, 5 mol%) and dppb (42.7 mg, 0.1 mmol, 5 mol%) in THF (10 mL). The mixture was heated under reflux for 6 h, cooled and the solvent was evaporated. The residue was chromatographed on silica gel (8 g, 2-5% EtOAc/hexanes) to give **12** as a light yellow oil (272.1 mg, 39%): <sup>1</sup>H NMR (200 MHz): 5.88-5.64 (m, =CH, 1H), 5.06-4.91 (m, CH=CH<sub>2</sub>, 2H), 4.85 [br s, C(CH<sub>3</sub>)=CH<sub>2</sub>, 1H], 4.68 [br s, C(CH<sub>3</sub>)=CH<sub>2</sub>, 1H], 2.70-2.05 (m, 9H), 1.75-1.3 (m, 5H) overlapping 1.58 [s, (CH<sub>3</sub>)C=CH<sub>2</sub>, 3H] and 1.48 [s, COSC(CH<sub>3</sub>)<sub>3</sub>, 9H], 1.02 (s, C2-CH<sub>3</sub>, 3H); <sup>13</sup>C NMR (50 MHz): 222.4 (C=O), 202.9 [COSC(CH<sub>3</sub>)<sub>3</sub>], 141.4 [C(CH<sub>3</sub>)=CH<sub>2</sub>], 138.2 (CH=CH<sub>2</sub>), 115.2 (=CH<sub>2</sub>), 114.8 (=CH<sub>2</sub>), 54.6, 51.6, 48.6, 43.8, 42.9, 37.5, 33.7, 30.8, 29.8 [SC(CH<sub>3</sub>)], 25.9, 24.6, 23.3, 20.1. HRMS (EI) calc. for C<sub>21</sub>H<sub>34</sub>O<sub>2</sub>S: 350.2280; found: 350.2274.

***S*-tert-Butyl (2*R*\*)-2-[(1*R*\*,2*R*\*)-2-methyl-2-(2-methyl-2-propenyl)-3-oxocyclohexyl]hex-5-enethioate (13)**

2-Methylcyclohex-2-en-1-one (**50**) (220.0 mg, 2.0 mmol) was added dropwise to a mixture of **45** (620.0 mg, 2.40 mmol), Me<sub>3</sub>SiOTf (40 μl, 0.2 mmol, 10 mol%) and anhyd DCM (6 mL), stirred under argon at -78 °C. Stirring at -78 °C was continued for 20 h and then 2-pyridinemethanol (29 μl, 0.30 mmol, 15 mol%) was added. The mixture was allowed to warm to rt (in ca. 30 min) and then it was diluted with hexanes (12 mL) and filtered through deactivated silica gel (15 g). The solvent was evaporated to give silyl enol ether **51**. A solution of this product and carbonate **53** (520.0 mg, 4.0 mmol) in THF (6 mL) was added to a stirred solution of Pd(OAc)<sub>2</sub> (22.4 mg, 0.10 mmol, 5 mol%) and dppb (42.7 mg, 0.10 mmol) in THF (6 mL). The mixture was heated under reflux for 6 h, cooled and the solvent was evaporated. The residue was chromatographed on silica gel (3% EtOAc/hexanes) to give **13**

(154.1 mg, 22%):  $^1\text{H}$  NMR (200 MHz): 5.88-5.64 (m,  $\text{CH}=\text{CH}_2$ , 1H), 5.12-4.92 (m,  $\text{CH}=\text{CH}_2$ , 2H), 4.84 [br s,  $\text{C}(\text{CH}_3)=\text{CH}_2$ , 1H], 4.64 [br s,  $\text{C}(\text{CH}_3)=\text{CH}_2$ , 1H], 2.70-2.26 (m, 7H), 2.24-1.40 (m, 7H) overlapping 1.62 [s,  $\text{C}(\text{CH}_3)=\text{CH}_2$ , 3H] and 1.44 [s,  $\text{COSC}(\text{CH}_3)_3$ , 9H], 1.02 (s,  $\text{C}2'-\text{CH}_3$ , 3H);  $^{13}\text{C}$  NMR (50 MHz): 214.7 (C=O), 203.4 [ $\text{COSC}(\text{CH}_3)_3$ ], 141.5 [ $\text{C}(\text{CH}_3)=\text{CH}_2$ ], 137.6 ( $\text{CH}=\text{CH}_2$ ), 115.6 ( $=\text{CH}_2$ ), 115.3 ( $=\text{CH}_2$ ), 52.9, 48.0, 44.5, 44.2, 38.4, 32.0, 29.7 [ $\text{COSC}(\text{CH}_3)_3$ ], 28.2, 24.5, 23.8, 22.6, 20.8. HRMS (EI,  $m/z$ ) calc. for  $\text{C}_{21}\text{H}_{34}\text{O}_2\text{S}$ : 350.2288; found: 350.2280.

***S*-tert-Butyl (2*S*\*)-2-[(1*R*\*,2*R*\*)-2-(2-methyl-2-propenyl)-3-oxocyclopentyl]-hex-5-enthioate (14)**

Cyclopent-2-en-1-one (**54**) (82.0 mg, 1.00 mmol) was added dropwise to a mixture of **45** (309.8 mg, 1.20 mmol) and  $\text{Me}_3\text{SiOTf}$  (10  $\mu\text{l}$ , 0.05 mmol, 5 mol %), and anhyd DCM (3 mL), stirred under argon at  $-78$  °C. Stirring at  $-78$  °C was continued for 3 h and then 2-pyridinemethanol (7.2  $\mu\text{l}$ , 0.075 mmol, 7.5 mol%) was added. The mixture was allowed to warm to rt (in ca. 30 min) and then it was diluted with hexanes (6 mL) and filtered through deactivated silica gel (1.5 g). The solvent was removed to give silyl enol ether **55**. A solution of this product and carbonate **53** (260.3 mg, 2.00 mmol) in THF (5 mL) was added to a stirred solution of  $\text{Pd}_2(\text{dba})_3$  (45.8 mg, 0.050 mmol, 5 mol%) and dppe (119.0 mg, 0.30 mmol, 30 mol%) in THF (5 mL). The mixture was heated under reflux for 6 h, cooled and the solvent was evaporated. The residue was chromatographed on silica gel (5% EtOAc/hexanes) to give **14** (119.1 mg, 37%):  $^1\text{H}$  NMR (200 MHz): 5.90-5.64 (m,  $\text{CH}=\text{CH}_2$ , 1H), 5.12-4.92 (m,  $\text{CH}_2=$ , 2H), 4.88-4.68 (m,  $\text{CH}_2=$ , 2H), 2.74-2.56 (m, 1H), 2.44-1.54 (m, 11H) overlapping 1.68 (s,  $\text{CH}_3\text{C}=\text{CH}_2$ , 3H), 1.52-1.20 (m, 1H) overlapping 1.46 [s,  $\text{SC}(\text{CH}_3)_3$ , 9H];  $^{13}\text{C}$  NMR (50 MHz): 219.5 (C=O), 202.8 [ $\text{COSC}(\text{CH}_3)_3$ ], 142.6 ( $\text{CH}_3\text{C}=\text{CH}_2$ ), 137.6 ( $\text{CH}=\text{}$ ), 115.5 ( $\text{CH}_2=$ ), 113.5 ( $\text{CH}_2=$ ), 55.8, 49.7, 48.4 [ $\text{COSC}(\text{CH}_3)_3$ ], 43.8, 37.9, 37.1, 31.5, 29.7 [ $\text{COSC}(\text{CH}_3)_3$ ], 27.6, 23.5, 22.5. HRMS (EI) calc. for  $\text{C}_{19}\text{H}_{30}\text{O}_2\text{S}$ : 322.1967; found: 322.1974.

***S*-tert-Butyl (2*R*\*)-2[(1*R*\*,2*R*\*)-2-allyl-2-methyl-3-oxocyclopentyl]hex-5-enthioate (17)**

2-Methylcyclopent-2-en-1-one (**49**) (1.0 mL, 10.0 mmol) was added dropwise to a mixture of **45** (3.102 g, 12.0 mmol),  $\text{Me}_3\text{SiOTf}$  (98  $\mu\text{l}$ , 0.5 mmol) and anhyd DCM (90 mL), stirred under argon at  $-78$  °C. Stirring at  $-78$  °C was continued for 3 h and then 2-pyridinemethanol (72  $\mu\text{l}$ , 0.75 mmol) was added. The mixture was allowed to warm to rt (in ca. 30 min) and then it was diluted with hexanes (90 mL) and filtered through deactivated silica gel (40 g).

The solvent was evaporated to give silyl enol ether **51** (3.612 g, 98%). A solution of this product (3.612 g, 9.80 mmol) and allyl methyl carbonate<sup>9</sup> **52** (2.276 g, 19.6 mmol) in THF (24 mL) (prepared under argon) was added to a stirred solution of Pd<sub>2</sub>(dba)<sub>3</sub> (274.7 mg) and dppe (956.2 mg, 2.4 mmol) in THF (48 mL). The mixture was heated under reflux for 6 h, cooled and the solvent was evaporated. The residue was chromatographed on silica gel (120 g, 3% EtOAc/hexanes) to give **17** (3.162 g, 68%): <sup>1</sup>H NMR (200 MHz): 5.90-5.50 (m, CH=CH<sub>2</sub>, 2H), 5.10-4.92 (m, CH=CH<sub>2</sub>, 4H), 2.70-2.25 (m, 4H), 2.20-1.85 (m, 5H), 1.80-1.55 (m, 3H), 1.49 [s, SC(CH<sub>3</sub>)<sub>3</sub>, 9H], 1.01 (s, C<sub>2</sub>CH<sub>3</sub>, 3H); <sup>13</sup>C NMR (50 MHz): 221.9 (C=O), 202.9 [COSC(CH<sub>3</sub>)<sub>3</sub>], 137.8 (CH=CH<sub>2</sub>), 133.8 (CH=CH<sub>2</sub>), 118.7 (CH=CH<sub>2</sub>), 115.3 (CH=CH<sub>2</sub>), 54.0 [CHCOSC(CH<sub>3</sub>)<sub>3</sub>], 52.3 (C<sub>2</sub>), 48.7 [COSC(CH<sub>3</sub>)<sub>3</sub>], 43.1, 39.8, 37.5, 30.8, 29.6 [COSC(CH<sub>3</sub>)<sub>3</sub>], 23.4, 18.7. HRMS (EI) calc. for C<sub>19</sub>H<sub>30</sub>O<sub>2</sub>S: 322.1967; found: 322.1970.

***S*-tert-Butyl (2*R*\*)-2-[(1*R*\*,2*R*\*)-2-allyl-2-methyl-3-oxocyclopentyl]-4,4-dimethylhex-5-enthioate (18)**

2-Methylcyclopent-2-en-1-one (**49**) (1.0 g, 3.50 mmol) was added dropwise to a mixture of **46** (280.0 mg, 2.91 mmol), TrSbCl<sub>6</sub> (67.4 mg, 0.12 mmol, 4 mol%) and anhyd DCM (20 mL), stirred under argon at -78 °C. Stirring at -78 °C was continued for 1 h and then 2-pyridinemethanol (21 μL, 0.22 mmol, 7.5 mol%) was added. The mixture was allowed to warm to rt (in ca. 30 min) and then it was diluted with hexanes (40 mL) and filtered through deactivated silica gel (8 g). The solvent was evaporated to give silyl enol ether **51**. A solution of this product and carbonate **52** (676.7 mg, 5.83 mmol) in THF (10 mL) was added to a stirred solution of Pd<sub>2</sub>(dba)<sub>3</sub> (80.1 mg, 0.09 mmol, 3 mol%) and dppe (200.2 mg, 0.53 mmol, 18 mol%) in THF (20 mL). The mixture was heated under reflux for 6 h, cooled and the solvent was evaporated. The residue was chromatographed on silica gel (3% EtOAc/hexanes) to give **18** (704.4 mg, 69%): <sup>1</sup>H NMR (200 MHz): 5.82-5.48 (m, =CH, 1H) overlapping 5.72 (dd, *J*= 17.5, 10.6 Hz, 1H), 5.20-4.86 (m, =CH<sub>2</sub>, 4H), 2.72-2.52 (m, 1H), 2.44-2.22 (m, 3H), 2.21-1.50 (m, C<sub>4</sub>-CH<sub>3</sub>, 6H), 1.45 [s, COSC(CH<sub>3</sub>)<sub>3</sub>, 9H], 1.02 (s, 6H), 0.99 (s, C<sub>2</sub>-CH<sub>3</sub>, 3H); <sup>13</sup>C NMR (50 MHz): 221.6 (C=O), 203.4 [COSC(CH<sub>3</sub>)<sub>3</sub>], 147.1 (=CH), 133.6 (=CH), 118.9 (=CH<sub>2</sub>), 111.6 (=CH<sub>2</sub>), 52.6, 50.6, 48.4, 44.8, 41.8, 40.2, 37.2, 37.1, 29.7 [C(CH<sub>3</sub>)<sub>3</sub>], 27.9, 26.6, 22.4, 18.2. HRMS (EI) calc. for C<sub>21</sub>H<sub>34</sub>O<sub>2</sub>S: 350.2280; found: 350.2283.

***S*-tert-Butyl (2*R*\*)-2-[(1*R*\*,2*R*\*)-2-allyl-2-methyl-3-oxocyclohexyl]-hex-5-enthioate (19)**

2-Methylcyclohex-2-en-1-one (**50**) (441 mg, 4.00 mmol) was added dropwise to a mixture of **45** (1.241 g, 4.8 mmol), Me<sub>3</sub>SiOTf (79 μl, 0.4 mmol, 10 mol%) and anhyd DCM (12 mL),

stirred under argon at  $-78\text{ }^{\circ}\text{C}$ . Stirring at  $-78\text{ }^{\circ}\text{C}$  was continued for 20 h and then 2-pyridinemethanol (50  $\mu\text{l}$ , 0.52 mmol, 13 mol%) was added. The mixture was allowed to warm to rt (in ca. 30 min) and then it was diluted with hexanes (24 mL) and filtered through deactivated silica gel (6 g). The solvent was evaporated in vacuo to give silyl enol ether **51**. A solution of this product and carbonate **52** (928.0 mg, 8.0 mmol) in THF ( mL) was added to a stirred solution of  $\text{Pd}_2(\text{dba})_3$  (109.9 mg, 0.12 mmol, 3 mol%) and dppe (286.9 mg, 0.72 mmol) in THF (10 mL). The mixture was heated at  $60\text{ }^{\circ}\text{C}$  for 30 h, cooled and the solvent was evaporated. The residue was chromatographed on silica gel (5% EtOAc/hexanes) to give **19** (927.4 mg, 69%):  $^1\text{H}$  NMR (200 MHz): 5.86-5.60 (m,  $\text{CH}=\underline{\text{C}}\text{H}_2$ , 2H), 5.20-4.80 (m,  $\text{C}\underline{\text{H}}=\text{CH}_2$ , 4H), 2.72-2.43 (m, 2H), 2.41-1.34 (m, 12H) overlapping 1.44 [s,  $\text{SC}(\text{CH}_3)_3$ , 9H] and 1.02 (s,  $\text{C}2'-\text{CH}_3$ , 3H),  $^{13}\text{C}$  NMR (50 MHz): 214.0 (C=O), 203.1 [ $\text{COSC}(\text{CH}_3)_3$ ], 137.6 ( $\text{C}\underline{\text{H}}=\text{CH}_2$ ), 134.1 ( $\text{C}\underline{\text{H}}=\text{CH}_2$ ), 118.5 ( $\text{CH}=\underline{\text{C}}\text{H}_2$ ), 115.6 ( $\text{CH}=\underline{\text{C}}\text{H}_2$ ), 53.4 (C2'), 52.6, 48.1 [ $\text{COSC}(\text{CH}_3)_3$ ], 44.2, 40.7, 38.6, 32.0, 29.7 [ $\text{COSC}(\underline{\text{C}}\text{H}_3)_3$ ], 28.0, 24.2, 22.6, 20.4. HRMS (EI) calc. for  $\text{C}_{20}\text{H}_{32}\text{O}_2\text{S}$ : 336.2123; found: 336.2122.

***S*-tert-Butyl (2*R*\*)-2-[(1*R*\*,2*R*\*)-2-allyl-2-methyl-3-oxocyclohexyl]-4,4-dimethyl hex-5-enethioate (20)**

2-Methylcyclohex-2-en-1-one (**50**) (441.0 mg, 4.0 mmol) was added dropwise to a mixture of **46** (1.375 g, 4.8 mmol),  $\text{Me}_3\text{SiOTf}$  (79  $\mu\text{l}$ , 0.4 mmol, 10 mol%) and anhyd DCM (12 mL), stirred under argon at  $-78\text{ }^{\circ}\text{C}$ . Stirring at  $-78\text{ }^{\circ}\text{C}$  was continued for 20 h and then 2-pyridinemethanol (58  $\mu\text{l}$ , 0.6 mmol, 15 mol%) was added. The mixture was allowed to warm to rt (in ca. 30 min) and then it was diluted with hexanes (24 mL) and filtered through deactivated silica gel (6 g). The solvent was evaporated to give silyl enol ether **51**. A solution of this product and carbonate **52** (928 mg, 7.99 mmol) in THF (12 mL) was added to a stirred solution of  $\text{Pd}_2(\text{dba})_3$  (109.9 mg, 0.12 mmol, 3 mol%) and dppe (286.9 mg, 0.72 mmol, 18 mol%) in THF (10 mL). The mixture was heated at  $60\text{ }^{\circ}\text{C}$  for 30 h, cooled and the solvent was evaporated. The residue was chromatographed on silica gel (5% EtOAc/hexanes) to give **20** (902.7 mg, 62%):  $^1\text{H}$  NMR (200 MHz): 5.96-5.60 (m,  $\text{C}\underline{\text{H}}=\text{CH}_2$ , 2H), 5.24-4.88 (m,  $\text{C}\underline{\text{H}}=\text{CH}_2$ , 4H), 2.77 (br s, 0.5 $\times$ 1H), 2.72 (br s, 0.5 $\times$ 1H), 2.58-2.20 (m, 4H), 2.10-1.48 (m, 6H), 1.46-1.30 (m, 9H) overlapping 1.42 [s,  $\text{COSC}(\text{CH}_3)_3$ , 9H], 1.06 (s,  $\text{C}4-\text{CH}_3$ , 3H), 1.01 (s,  $\text{C}4-\text{CH}_3$ , 3H), 0.97 (s,  $\text{C}2'-\text{CH}_3$ , 3H);  $^{13}\text{C}$  NMR (50 MHz): 214.1 (C=O), 203.0, [ $\text{COSC}(\text{CH}_3)_3$ ], 147.2 ( $\text{C}\underline{\text{H}}=\text{CH}_2$ ), 134.4 ( $\text{C}\underline{\text{H}}=\text{CH}_2$ ), 118.4 ( $\text{CH}=\underline{\text{C}}\text{H}_2$ ), 111.8 ( $\text{CH}=\underline{\text{C}}\text{H}_2$ ), 53.7, 49.7, 47.8, 46.3,

40.7, 38.9, 38.6, 37.4, 29.7 [COSC(CH<sub>3</sub>)<sub>3</sub>], 28.1, 25.8, 24.7, 21.7, 20.3. HRMS (EI) calc. for C<sub>24</sub>H<sub>36</sub>O<sub>2</sub>S: 364.2436; found: 364.2424.

***S*-tert-Butyl (2*R*\*,4*E/Z*)-2-[(1*R*\*,2*R*\*)-2-methyl-2-(2-methylprop-2-enyl)-3-oxocyclopentyl]hex-4-enethioate (10)**

A solution of thioester **3** (180.6 mg, 0.54 mmol) in benzene (4 mL) was added to a solution of ruthenium hydride **9** (5.1 mg, 0.054 mmol, 1 mol%) in benzene (4 mL), and the mixture was heated under reflux for 10 min (GC indicated the substrate consumption). The solvent was evaporated and residue was chromatographed on silica (5% EtOAc/hexane) to give **10** as a yellow oil (157.1 mg, 87%; *E:Z* = 2.6 : 1 by GC): <sup>1</sup>H NMR (400 MHz): 5.57-5.32 (m, =CH<sub>2</sub>, 2H), 4.88-4.82 (m, =CH<sub>2</sub>, 1H), 4.70-4.66 (m, =CH<sub>2</sub>, 1H), 2.69-2.52 (m, 2H), 2.47-2.04 (m, 8H), 1.66-1.61 (m, 3H), 1.60-1.56 (m, 3H), 1.45 [s, COSC(CH<sub>3</sub>)<sub>3</sub>, 9H], 1.03 and 1.02 (2s, =CHCH<sub>3</sub>, 3H); <sup>13</sup>C NMR (50 MHz): 222.6 (C=O), 202.4 [COSC(CH<sub>3</sub>)<sub>3</sub>], 141.5 [C(CH<sub>3</sub>)=CH<sub>2</sub>], 127.8 (=CH), 126.9 (=CH), 126.2 (=CH), 126.0 (=CH), 115.2 [C(CH<sub>3</sub>)=CH<sub>2</sub>], 55.1, 54.7, 51.6, 48.5, 43.7, 42.5, 37.5, 34.8, 29.7 [SC(CH<sub>3</sub>)], 28.9, 24.6, 23.4, 23.3, 20.2, 17.8. HRMS (ESI) calc. for C<sub>20</sub>H<sub>32</sub>O<sub>6</sub>Na: 336.2123; found: 336.2126.

**Methyl (2*S*\*)-2-[(1*R*\*,2*R*\*)-2-methyl-2-(2-methylprop-2-enyl)-3-oxocyclopentyl]hex-5-enoate (27) and methyl (2*R*\*)-2-[(1*R*\*,2*R*\*)-2-methyl-2-(2-methylprop-2-enyl)-3-oxocyclopentyl]hex-5-enoate (29)**

A mixture of thioester **3** (635 mg, 1.89 mmol) and MeOK in MeOH (freshly prepared from K, 0.515 g, 13.2 mg atom, and MeOH, 3 mL) was heated under reflux for 30 h, cooled and poured into water (30 mL). The product was isolated with toluene and chromatographed on silica gel (80 g, 3% EtOAc/hexanes, 100 : 1), to give **27** (210-221 mg, 40-42%) and **29** (237-258 mg, 45-49%); TLC (10% EtOAc/hexanes, R<sub>f</sub> 0.22 and 0.17, respectively).

**27**: <sup>1</sup>H NMR (200 MHz): 5.90-5.66 (m, CH=CH<sub>2</sub>, 1H), 5.10-4.92 (m, CH=CH<sub>2</sub>, 2H), 4.83 (br s, CH<sub>2</sub>=CCH<sub>3</sub>, 1H), 4.63 (br s, CH<sub>2</sub>=CCH<sub>3</sub>, 1H), 3.70 (s, CO<sub>2</sub>CH<sub>3</sub>, 3H), 2.62-2.29 (m, 4H), 2.28-2.05 (m, 2H), 2.04-1.80 (m, 2H), 1.78-1.58 (m, 3H), 1.56 (br. s, CH<sub>2</sub>=CCH<sub>3</sub>, 3H), 1.54-1.36 (m, 1H), 0.96 (s, C2-CH<sub>3</sub>, 3H); <sup>13</sup>C NMR (50 MHz): 222.5 (C=O), 175.6 (CO<sub>2</sub>CH<sub>3</sub>), 141.5 (CH<sub>2</sub>=CCH<sub>3</sub>), 137.5 (CH=CH<sub>2</sub>), 115.4 (=CH<sub>2</sub>), 115.4 (=CH<sub>2</sub>), 51.5, 51.4, 46.1, 43.8, 43.0, 37.3, 31.5, 29.8, 24.5, 23.6, 19.5. HRMS calc. for C<sub>17</sub>H<sub>26</sub>O<sub>3</sub>: 278.1882; found: 278.1884.

**29**: <sup>1</sup>H NMR (200 MHz): 5.90-5.66 (m, CH=CH<sub>2</sub>, 1H), 5.10-4.92 (m, CH<sub>2</sub>=CCH<sub>3</sub>, 2H), 4.86 (br s, CH<sub>2</sub>=CCH<sub>3</sub>, 1H), 4.69 (br s, CH<sub>2</sub>=CCH<sub>3</sub>, 1H), 3.69 (s, CO<sub>2</sub>CH<sub>3</sub>, 3H), 2.74-2.39 (m, 2H),

2.38-2.09 (m, 4H), 2.08-1.74 (m, 4H), 1.73-1.56 (m, 2H), 1.52 (br. s, CH<sub>2</sub>=CCH<sub>3</sub>, 3H), 0.88 (s, C<sub>2</sub>-CH<sub>3</sub>, 3H); <sup>13</sup>C NMR (50 MHz): 222.2 (C=O), 175.6 (CO<sub>2</sub>CH<sub>3</sub>), 141.9 (CH<sub>2</sub>=CCH<sub>3</sub>), 137.3 (CH=CH<sub>2</sub>), 115.9 (=CH<sub>2</sub>), 115.5 (=CH<sub>2</sub>), 51.4, 51.4, 47.0, 45.6, 43.3, 37.1, 31.8, 30.8, 23.9, 23.3, 19.1. HRMS calc. for C<sub>17</sub>H<sub>26</sub>O<sub>3</sub>: 278.1882, found: 278.1886.

**Methyl (2R\*)-2-[(1R\*,2R\*)-2-allyl-2-methyl-3-oxocyclopentyl]-4,4-dimethylhex-5-enoate (28)**

The mixture of thioester **18** (204.0 mg, 0.58 mmol) and MeOK in MeOH (prepared from K, 272 mg, 6.98 mg atom and MeOH, 3 mL) was heated under reflux for 6 h, cooled and poured into water (20 mL). The product was isolated with toluene and chromatographed on silica gel (5% EtOAc/hexanes) to give ester **28** (137 mg, 82%): <sup>1</sup>H NMR (200 MHz): 5.78-5.40 (m, =CH, 2H), 5.07-4.82 (m, =CH<sub>2</sub>, 4H), 3.63 (s, COOCH<sub>3</sub>, 3H), 2.52 (m, 4H), 2.20-1.68 (m, 4H), 1.65-1.24 (m, 2H), 1.02 (s, C<sub>2</sub>'-CH<sub>3</sub>, 3H), 0.97 [s, C<sub>4</sub>-(CH<sub>3</sub>)<sub>2</sub>, 6H]; <sup>13</sup>C NMR (50 MHz): 221.9 (C=O), 176.3 (CO<sub>2</sub>CH<sub>3</sub>), 147.0 (=CH), 133.6 (=CH), 118.8 (=CH<sub>3</sub>), 111.1 (=CH<sub>3</sub>), 52.3, 51.1, 43.6, 42.8, 42.6, 39.5, 37.1, 36.7, 27.6, 26.0, 23.9, 18.0. HRMS calc. for C<sub>18</sub>H<sub>28</sub>O<sub>3</sub>: 292.2038; found: 292.2046.

**Methyl (2R\*)-2-[(1R\*,2R\*)-2-allyl-2-methyl-3-oxocyclopentyl]hex-5-enoate (30) and methyl (2S\*)-2-[(1R\*,2R\*)-2-allyl-2-methyl-3-oxocyclopentyl]hex-5-enoate (31)**

The mixture of thioester **17** (330 mg, 1.02 mmol) and MeOK in MeOH (prepared from 0.73 g K, 18.7 mg atom and 8 mL MeOH) was heated under reflux for 3.5 h, cooled and poured into water (10 mL). The product was isolated with hexanes and chromatographed on silica gel (33 g, 3% EtOAc/hexanes) to give **30** (124 mg, 46%) and **31** (113 mg, 42%).

**30**: <sup>1</sup>H NMR (200 MHz): 5.85-5.35 (m, =CH, 2H), 5.15-4.85 (m, =CH<sub>2</sub>, 4H), 3.65 (s, COOCH<sub>3</sub>, 3H), 2.55-2.20 (m, 4H), 2.15-1.55 (m, 5H), 1.53-1.20 (m, 3H), 0.89 (s, C<sub>2</sub>'-CH<sub>3</sub>, 3H); <sup>13</sup>C NMR (50 MHz): 221.6 (C=O), 175.4 (COOCH<sub>3</sub>), 137.3 (=CH), 133.5 (=CH), 118.7 (=CH<sub>2</sub>), 115.2 (=CH<sub>2</sub>), 51.9, 51.2, 45.9, 43.1, 39.7, 37.2, 31.2, 29.9, 23.6, 18.2. HRMS calc. for C<sub>16</sub>H<sub>24</sub>O<sub>3</sub>: 264.1725; found: 264.1734.

**31**: <sup>1</sup>H NMR (200 MHz): 5.90-5.45 (m, =CH, 2H), 5.18-4.90 (m, =CH<sub>2</sub>, 4H), 3.70 (s, COOCH<sub>3</sub>, 3H), 2.58-2.24 (m, 4H), 2.22-1.60 (m, 5H), 1.58-1.25 (m, 3H), 0.94 (s, C<sub>2</sub>'-CH<sub>3</sub>, 3H); <sup>13</sup>C NMR (50 MHz): 221.8 (C=O), 175.6 (COOCH<sub>3</sub>), 137.4 (=CH), 133.6 (=CH), 118.8 (=CH<sub>2</sub>), 115.4 (=CH<sub>2</sub>), 52.0, 51.3, 46.0, 43.2, 39.8, 37.4, 31.3, 30.0, 23.7, 18.3. HRMS calc. for C<sub>16</sub>H<sub>24</sub>O<sub>3</sub>: 264.1725; found: 264.1713.

**(2*R*\*)-2-[(1*R*\*,2*R*\*)-2-Allyl-2-methyl-3-oxocyclopentyl]hex-5-enyl benzoate (38)**

DIBALH (1.5 M in toluene, 3 mL, 4.5 mmol) was added to a solution of thioestr 3 (203 mg, 0.63 mmol) in DCM (10 mL), stirred at  $-78$  °C. Stirring at  $-78$  °C was continued for 1 h and then the mixture was allowed to warm to rt. After 24 h, MeOH (6 mL) and 10% aqueous tartaric acid (30 mL) were added. The mixture was extracted with DCM ( $3 \times 25$  mL). The combined organic extracts were dried and the solvent was evaporated to give (1*R*\*,2*R*\*,3*R*\*)- and (1*S*\*,2*R*\*,3*R*\*)-2-allyl-3-[1-(hydroxymethyl)pent-4-enyl]-2-methylcyclopentanols (bright yellow oil, 138 mg, 94%):

$^1\text{H}$  NMR (200 MHz): 6.11-5.68 (m, =CH, 2H), 5.20-4.90 (m, =CH<sub>2</sub>, 4H), 3.86 (dd,  $J = 8.4$ , 8.4 Hz,  $\underline{\text{C}}\text{HOH}$ , 0.3×1H), 3.76 (dd,  $J = 5.3$ , 1.5 Hz,  $\underline{\text{C}}\text{HOH}$ , 0.7×1H), 3.70-3.50 (m,  $\underline{\text{C}}\text{H}_2\text{OH}$ , 2H), 2.42-1.85 (m, 6H), 1.80 (s, OH, 2H, disappears on exchange with D<sub>2</sub>O), 1.75-1.07 (m, 6H), 0.82 (s, C2-CH<sub>3</sub>, 0.3×3H), 0.80 (s, C2-CH<sub>3</sub>, 0.7×3H), (diastereomer ratio ca. 2 : 1);  $^{13}\text{C}$  NMR (50 MHz): 138.9 (=CH), 136.4 (=CH), 136.0 (=CH), 117.5 (=CH<sub>2</sub>), 116.8 (=CH<sub>2</sub>), 114.6 (=CH<sub>2</sub>), 81.1 ( $\underline{\text{C}}\text{HOH}$ ), 78.3 ( $\underline{\text{C}}\text{HOH}$ ), 64.3 ( $\underline{\text{C}}\text{H}_2\text{OH}$ ), 63.8 ( $\underline{\text{C}}\text{H}_2\text{OH}$ ), 48.2, 46.3, 44.9, 44.0, 43.8, 41.4, 40.4, 40.2, 39.7, 31.6, 31.5, 30.7, 29.7, 29.2, 28.3, 27.6, 24.8, 22.7, 18.3, 14.1, 13.5. HRMS calc. for C<sub>15</sub>H<sub>26</sub>O<sub>2</sub>: 238.1933; found: 238.1939.

To a solution of these alcohols (96 mg, 0.40 mmol) in DCM (3 mL), pyridine (65  $\mu\text{L}$ , 8.05 mmol) and benzoyl chloride (68  $\mu\text{L}$ , 0.6 mmol) were added. The mixture was stirred for 3 h at rt, diluted with DCM (10 mL) and washed with water ( $3 \times 10$  mL). The water layer was extracted with DCM ( $2 \times 10$  mL). The combined organic extracts were dried and evaporated. The residue was chromatographed on silica gel (15% EtOAc/hexanes) to give monobenzoates, (1*R*\*,2*R*\*,3*R*\*)- and (1*S*\*,2*R*\*,3*R*\*)-2-allyl-3-[1-(benzoyloxymethyl)pent-4-enyl]-2-methylcyclopentanols (oil, 114 mg, 82%, diastereomer ratio 7:3, by integration of  $\underline{\text{C}}\text{H}_2\text{OBz}$  signals in the  $^1\text{H}$  NMR spectrum, 3.86 and 3.79 ppm).

$^1\text{H}$  NMR (200 MHz): 8.10-7.95 (m, C<sub>6</sub>H<sub>5</sub>, 2H), 7.68-7.13 (m, C<sub>6</sub>H<sub>5</sub>, 3H), 6.12-5.70 (m, =CH, 2H), 5.18-4.90 (m, =CH<sub>2</sub>, 4H), 4.37 (dd,  $J = 11.1$ , 5.0 Hz,  $\underline{\text{C}}\text{H}_2\text{OCOC}_6\text{H}_5$ , 1H), 4.25 (dd,  $J = 11.1$ , 4.6 Hz,  $\underline{\text{C}}\text{H}_2\text{OCOC}_6\text{H}_5$ , 1H), 3.86 (dd,  $J = 8.4$ , 8.4 Hz,  $\underline{\text{C}}\text{HOH}$ , 0.3×1H), 3.79 (dd,  $J = 5.1$ , 1.3 Hz,  $\underline{\text{C}}\text{HOH}$ , 0.7×1H), 2.40-1.30 (m, 12H) overlapping 1.71 (s, OH, 1H), 0.89 (s, C2'-CH<sub>3</sub>, 0.33×3H), 0.86 (s, C2'-CH<sub>3</sub>, 0.66×3H);  $^{13}\text{C}$  NMR (50 MHz): 166.6 ( $\underline{\text{C}}\text{H}_2\text{OCOC}_6\text{H}_5$ ), 138.5, 136.1, 135.5, 132.8, 130.2, 129.5, 128.3, 117.7, 116.9, 114.8, 81.1, 78.5, 66.5, 48.4, 46.6, 45.8, 45.1, 44.3, 41.5, 37.1, 31.3, 30.7, 29.0, 28.1, 25.5, 22.8, 18.2, 13.5. HRMS (LSIMS) calc. for C<sub>22</sub>H<sub>30</sub>O<sub>3</sub>Na: 365.2087; found: 365.2098.

To a solution of these benzoates (112 mg, 0.33 mmol) in acetone (5 mL), Jones' reagent (ca. 3 mL) was added dropwise until deep orange colour persisted. After 0.5 h, *i*-PrOH (0.2 mL) was added the solution was diluted with hexanes (10 mL), washed with water (2 × 10 mL) and brine (1 × 10 mL), dried and evaporated. The residue was chromatographed on silica gel (5% EtOAc/hexanes) to give **38** (84 mg, 76%): <sup>1</sup>H NMR (200 MHz): 8.10-7.95 (m, C<sub>6</sub>H<sub>5</sub>, 2H), 7.65-7.40 (m, C<sub>6</sub>H<sub>5</sub>, 3H), 5.95-5.72 (m, =CH, 1H), 5.66-5.44 (m, =CH, 1H), 5.11-4.87 (m, =CH<sub>2</sub>, 4H), 4.47 (dd, *J* = 11.4, 5.0 Hz, CH<sub>2</sub>OCOC<sub>6</sub>H<sub>5</sub>, 1H), 4.28 (dd, *J* = 11.4, 5.0 Hz, CH<sub>2</sub>OCOC<sub>6</sub>H<sub>5</sub>, 1H) 2.60-1.92 (m, 9H), 1.76-1.42 (m, 3H), 0.99 (s, C2'-CH<sub>3</sub>, 3H); <sup>13</sup>C NMR (50 MHz): 222.3 (C=O), 166.5 (CH<sub>2</sub>OCOC<sub>6</sub>H<sub>5</sub>), 138.1, 133.8, 133.0, 130.1, 129.5, 128.4, 118.6 (=CH<sub>2</sub>), 115.1 (=CH<sub>2</sub>), 65.5, 52.0, 42.6, 41.8, 37.6, 37.3, 30.8, 27.9, 22.7, 18.2. HRMS calc. for C<sub>22</sub>H<sub>28</sub>O<sub>3</sub>: 340.2038, found: 340.2037.

**(2*R*\*,3*R*\*)-2-Allyl-3-[(1*S*\*)-1-(hydroxymethyl)pent-4-enyl]-2-methylcyclopentanone (37)**

Ester **38** (180 mg, 0.53 mmol) in MeOH (5 mL) was added to a solution of KOH (296 mg, 5.27 mmol) in MeOH (5 mL). The mixture was stirred at rt for 2 h, and then it was diluted with water (10 mL) and was extracted with DCM (3 × 10 mL). The organic extract was dried and evaporated. The residue was chromatographed on silica gel (20% EtOAc/hexanes) to give alcohol **37** (oil, 109 mg, 87%). <sup>1</sup>H NMR (200 MHz): 5.92-5.50 (m, =CH, 2H), 5.16-4.90 (m, =CH<sub>2</sub>, 4H), 3.68 (d, *J* = 4.4 Hz, CH<sub>2</sub>OH, 2H), 2.62-1.88 (m, 8H), 1.74-1.15 (m, 4H), 1.53 (s, 1H, disappears on exchange with D<sub>2</sub>O), 0.92 (s, CH<sub>3</sub>, 3H); <sup>13</sup>C NMR (50 MHz): 223.0 (C=O), 138.5 (=CH), 134.9 (=CH), 118.2 (=CH<sub>2</sub>), 114.8 (=CH<sub>2</sub>), 62.8, 51.9, 41.9, 41.8, 40.0, 37.6, 31.0, 27.3, 22.7, 18.1. HRMS calc. for C<sub>15</sub>H<sub>24</sub>O<sub>2</sub>: 236.1776; found: 236.1771.

**(2*S*\*)-2-[(1*R*\*,2*R*\*)-2-Allyl-2-methyl-3-oxocyclopentyl]hex-5-enyl benzoate (40)**

DIBALH (1.5 M in toluene, 12.8 mL, 19.25 mmol) was added to a solution of ester 31 (727 mg, 2.75 mmol) in DCM (35 mL), stirred at -78 °C. Stirring at -78 °C was continued for 1 h and at rt for 6 h. MeOH (20 mL) and 10% aqueous tartaric acid (140 mL) were then added and the mixture was extracted with DCM (3 × 50 mL). The combined extract was dried and the solvent was evaporated. The residue was chromatographed on silica gel (35% EtOAc/hexanes) to give diols, (1*R*\*,2*R*\*,3*R*\*)- and (1*S*\*,2*R*\*,3*R*\*)-3-[(1*S*\*)-1-(hydroxymethyl)pent-4-enyl]-2-methyl-2-allylcyclopentan-1-ols (oil, 612 mg, 93%): <sup>1</sup>H NMR (200 MHz): 6.10-5.70 (m, =CH, 2H), 5.20-4.90 (m, =CH<sub>2</sub>, 4H), 3.98-3.68 (m, CH<sub>2</sub>OH, 2H), 3.58-3.46 (m, CHOH, 1H), 2.42-2.20 (m, 2H), 2.18-1.82 (m, 4H), 1.78-1.36 (m, 7H). 0.88 (s,



C2-CH<sub>3</sub>, 0.4×3H), 0.81 (s, C2-CH<sub>3</sub>, 0.6×3H), (diastereomer ratio ca. 3 : 2 based on integration of the C2-CH<sub>3</sub> signals); <sup>13</sup>C NMR (50 MHz): 138.9 (=CH), 138.7 (=CH), 136.4 (=CH), 135.7 (=CH), 117.7 (=CH<sub>2</sub>), 116.8 (=CH<sub>2</sub>), 114.7 (=CH<sub>2</sub>), 114.6 (=CH<sub>2</sub>), 80.9, 79.0, 74.6, 63.9, 63.1, 48.3, 46.7, 45.4, 45.1, 41.7, 40.0, 39.7, 31.2, 30.9, 30.6, 30.2, 30.1, 29.5, 25.2, 23.2, 18.0, 13.8. MS (EI, m/z): 97 (57), 95 (65), 93 (58), 81 (100), 79 (57), 67 (70), 55 (74), 41 (86). HRMS (ES) calc. for C<sub>15</sub>H<sub>26</sub>O<sub>2</sub>Na: 261.1825 (M+Na)<sup>+</sup>; found: 261.1823.

To a solution of these diols (540 mg, 2.26 mmol) in DCM (3 mL), pyridine (380 μL, 4.6 mmol, 2 equiv.) and benzoyl chloride (395 μL, 3.4 mmol, 1.5 equiv.) were added. The mixture was stirred at rt for 3 h and poured into water (30 mL). The usual workup (DCM) gave a crude product which was chromatographed on silica gel (15% -30% EtOAc/hexanes) to give (1*R*\*,2*R*\*,3*R*\*)- and (1*S*\*,2*R*\*,3*R*\*)-3-[(1*S*\*)-1-(benzoiloxymethyl)pent-4-enyl]-2-methyl-2-allylcyclopentan-1-ols (oil, 671 mg, 86%): <sup>1</sup>H NMR (200 MHz): 8.12-7.96 (m, C<sub>6</sub>H<sub>5</sub>, 2H), 7.64-7.38 (m, C<sub>6</sub>H<sub>5</sub>, 3H), 6.15-5.68 (m, =CH, 2H), 5.24-4.90 (m, =CH<sub>2</sub>, 4H), 4.46 (dd, *J* = 11.3, 3.5 Hz, CH<sub>2</sub>OCOC<sub>6</sub>H<sub>5</sub>, 1H), 4.38-4.08 (m, CH<sub>2</sub>OCOC<sub>6</sub>H<sub>5</sub>, 1H), 3.88 (dd, *J* = 8.4, 8.4 Hz, CHOH, 0.4×1H), 3.80 (d, *J* = 5.7 Hz, CHOH, 0.6×1H), 2.46-2.26 (m, 2H), 2.24-1.78 (m, 5H), 1.88 (s, OH, 1H, disappears on exchange with D<sub>2</sub>O), 1.76-1.38 (m, 5H), 0.91 (s, C2'-CH<sub>3</sub>, 0.4×3H), 0.87 (s, C2'-CH<sub>3</sub>, 0.6×3H), (diastereomer ratio 3 : 2); <sup>13</sup>C NMR (50 MHz): 166.7 (CH<sub>2</sub>OCOC<sub>6</sub>H<sub>5</sub>), 138.5, 136.3, 135.7, 132.9, 130.3, 129.5, 128.4, 117.8, 117.0, 114.8, 80.7, 78.4, 66.4, 48.5, 46.5, 46.0, 45.3, 44.5, 41.6, 37.6, 36.6, 31.1, 31.0, 30.9, 30.6, 29.1, 25.1, 23.4, 18.0, 13.2. HRMS calc. for C<sub>22</sub>H<sub>30</sub>O<sub>3</sub>: 342.2195 (M<sup>+</sup>), found: 342.2200.

To a solution of these monobenzoates (651 mg, 1.89 mmol) in acetone (20 mL), Jones' reagent (ca. 5 mL) was added dropwise until orange colour persisted. After 0.5 h *i*-PrOH (0.5 mL) was added. The usual workup gave **40** (oil, 504 mg, 78%): <sup>1</sup>H NMR (200 MHz): 8.08-7.96 (m, C<sub>6</sub>H<sub>5</sub>, 2H), 7.66-7.40 (m, C<sub>6</sub>H<sub>5</sub>, 3H), 5.94-5.46 (m, =CH, 2H), 5.16-4.90 (m, =CH<sub>2</sub>, 4H), 4.48 (dd, *J*=11.5, 3.7 Hz, CH<sub>2</sub>OCOC<sub>6</sub>H<sub>5</sub>, 1H), 4.32 (dd, *J*=11.5, 4.4 Hz, CH<sub>2</sub>OCOC<sub>6</sub>H<sub>5</sub>, 1H), 2.68-2.52 (m, 1H), 2.50-1.82 (m, 8H), 1.80-1.44 (m, 3H), 0.99 (s, C2-CH<sub>3</sub>, 3H); <sup>13</sup>C NMR (50 MHz): 222.4 (C=O), 166.5 (CH<sub>2</sub>OCOC<sub>6</sub>H<sub>5</sub>), 138.0, 134.2, 133.0, 130.1, 129.5, 128.4, 118.5 (=CH<sub>2</sub>), 115.2 (=CH<sub>2</sub>), 64.5, 51.9, 42.7, 42.2, 38.0, 37.8, 30.9, 29.5, 23.6, 18.2. HRMS calc. for C<sub>22</sub>H<sub>28</sub>O<sub>3</sub>: 340.2038 (M<sup>+</sup>); found: 340.2044.

**(2*R*\*,3*R*\*)-2-Allyl-3-[(1*S*\*)-1-(hydroxymethyl)pent-4-enyl]-2-methylcyclopentanone (39)**

Benzoate **40** (154 mg, 0.441 mmol) was added to a solution of KOMe in MeOH, prepared by from potassium (120 mg) and MeOH (10 mL). The mixture was heated under reflux for 2 h,

cooled, diluted with water (10 mL) and extracted with DCM (3 × 10 mL). The combined organic extract were dried and the solvent was evaporated. The residue was chromatographed on silica gel (EtOAc/*t*-BuOMe/hexanes = 1/1/3) to give **39** (84 mg, 82%): IR (film): 3452 cm<sup>-1</sup> (-OH), 1736 cm<sup>-1</sup> (-C=O); <sup>1</sup>H NMR (200 MHz): 5.95-5.67 (m, =CH, 1H), 5.65-5.45 (m, =CH, 1H), 5.15-4.90 (m, =CH<sub>2</sub>, 4H), 3.90-3.60 (m, CH<sub>2</sub>OH, 2H), 2.60-2.43 (m, 1H), 2.40-1.90 (m, 6H), 1.76-1.42 (m, 4H), 1.40-1.08 (m, 2H), 0.94 (s, C<sub>2</sub>-CH<sub>3</sub>, 3H); <sup>13</sup>C NMR (50 MHz): 138.4 (=CH), 134.2 (=CH), 118.4 (=CH<sub>2</sub>), 114.9 (=CH<sub>2</sub>), 62.1, 51.8, 42.3, 40.2, 37.7, 31.1, 28.7, 23.2, 18.2. HRMS calc. for C<sub>15</sub>H<sub>24</sub>O<sub>2</sub>: 236.1776; found: 236.1778.

## References

1. Y. N. Ogibin, E. K. Starostin, A. V. Aleksandrov, K. K. Pivnitsky and G. I. Nikishin, *Synthesis*, 1994, 901-903.
2. W. G. Dauben, J. M. Cogen, G. A. Ganzer and V. Behar, *Journal of the American Chemical Society*, 1991, **113**, 5817-5824.
3. R. P. Hatch and S. M. Weinreb, *J. Org. Chem.*, 1977, **42**, 3960-3961.
4. N. A. Bergman, M. Jansson, Y. Chiang, A. J. Kresge and Y. Yin, *J. Org. Chem.*, 1987, **52**, 4449-4453.
5. K. Matsumoto, S. Tsutsumi, T. Ihori and H. Ohta, *Journal of the American Chemical Society*, 1990, **112**, 9614-9619.
6. A. L. J. Beckwith, C. J. Easton, T. Lawrence and A. K. Serelis, *Australian Journal of Chemistry*, 1983, **36**, 545-556.
7. Undistilled product prepared as described above was routinely used.
8. I. Minami and J. Tsuji, *Tetrahedron*, 1987, **43**, 3903-3915.
9. J. Tsuji, I. Shimizu, I. Minami, Y. Ohashi, T. Sugiura and K. Takahashi, *J. Org. Chem.*, 1985, **50**, 1523 - 1529.
